# Supplementary material for: Molecular Zinc Hydride Cations [ZnH]+: Synthesis, Structure, and CO2 Hydrosilylation Catalysis
Source: PubMed Central journal article supplement — Angew Chem Int Ed Engl. 2020 Oct 15;59(51):23335–42. doi: 10.1002/anie.202011480 (PMC7756573; doi:10.1002/anie.202011480), 2020-10-15
Supplement: ANIE-59-23335-s001.pdf [file ANIE-59-23335-s001.pdf]

Supporting Information

**Molecular Zinc Hydride Cations  $[\text{ZnH}]^+$ : Synthesis, Structure, and  $\text{CO}_2$  Hydrosilylation Catalysis**

*Florian Ritter, Thomas P. Spaniol, Iskander Douair, Laurent Maron, and Jun Okuda\**

anie\_202011480\_sm\_miscellaneous\_information.pdf

## Supporting Information

|                                                                                                                                                                                    |     |
|------------------------------------------------------------------------------------------------------------------------------------------------------------------------------------|-----|
| General Remarks .....                                                                                                                                                              | 1   |
| Experimental Procedures and Spectroscopic Data .....                                                                                                                               | 2   |
| Synthesis of [(TMEDA)H][B(3,5-(CF <sub>3</sub> ) <sub>2</sub> -C <sub>6</sub> H <sub>3</sub> ) <sub>4</sub> ] ( <b>1a</b> ) .....                                                  | 2   |
| Synthesis of [(TEEDA)H][B(3,5-(CF <sub>3</sub> ) <sub>2</sub> -C <sub>6</sub> H <sub>3</sub> ) <sub>4</sub> ] ( <b>1b</b> ) .....                                                  | 4   |
| Synthesis of [(TMEDA)ZnH(thf)][B(3,5-(CF <sub>3</sub> ) <sub>2</sub> -C <sub>6</sub> H <sub>3</sub> ) <sub>4</sub> ] ( <b>2a</b> ) .....                                           | 8   |
| Synthesis of [(TEEDA)ZnH] <sub>2</sub> [B(3,5-(CF <sub>3</sub> ) <sub>2</sub> -C <sub>6</sub> H <sub>3</sub> ) <sub>4</sub> ] ( <b>2b</b> ) .....                                  | 13  |
| Synthesis of [(TMEDA) <sub>2</sub> Zn <sub>2</sub> H <sub>3</sub> ][B(3,5-(CF <sub>3</sub> ) <sub>2</sub> -C <sub>6</sub> H <sub>3</sub> ) <sub>4</sub> ] ( <b>3a</b> ) .....      | 19  |
| Synthesis of [(TEEDA) <sub>2</sub> Zn <sub>2</sub> H <sub>3</sub> ][B(3,5-(CF <sub>3</sub> ) <sub>2</sub> -C <sub>6</sub> H <sub>3</sub> ) <sub>4</sub> ] ( <b>3b</b> ) .....      | 25  |
| Synthesis of [(TMEDA) <sub>3</sub> Zn <sub>3</sub> H <sub>4</sub> ][B(3,5-(CF <sub>3</sub> ) <sub>2</sub> -C <sub>6</sub> H <sub>3</sub> ) <sub>4</sub> ] ( <b>4a</b> ) .....      | 28  |
| Synthesis of [(TEEDA) <sub>3</sub> Zn <sub>3</sub> H <sub>4</sub> ][B(3,5-(CF <sub>3</sub> ) <sub>2</sub> -C <sub>6</sub> H <sub>3</sub> ) <sub>4</sub> ] ( <b>4b</b> ) .....      | 31  |
| Synthesis of [{(TEEDA)Zn(μ-H <sub>2</sub> )}{(TMEDA)ZnH] <sub>2</sub> ][B(3,5-(CF <sub>3</sub> ) <sub>2</sub> -C <sub>6</sub> H <sub>3</sub> ) <sub>2</sub> ] ( <b>4c</b> ) .....  | 35  |
| Synthesis of [(TMEDA)Zn(OCHO)] <sub>2</sub> [B(3,5-(CF <sub>3</sub> ) <sub>2</sub> -C <sub>6</sub> H <sub>3</sub> ) <sub>4</sub> ] ( <b>5a</b> ) .....                             | 40  |
| Synthesis of [(TEEDA)Zn(OCHO)] <sub>2</sub> [B(3,5-(CF <sub>3</sub> ) <sub>2</sub> -C <sub>6</sub> H <sub>3</sub> ) <sub>4</sub> ] ( <b>5b</b> ) .....                             | 43  |
| Synthesis of [(TMEDA) <sub>2</sub> Zn(OCHO) <sub>3</sub> ][B(3,5-(CF <sub>3</sub> ) <sub>2</sub> -C <sub>6</sub> H <sub>3</sub> ) <sub>4</sub> ] ( <b>6a</b> ) .....               | 46  |
| Synthesis of [(TEEDA) <sub>2</sub> Zn <sub>2</sub> (OCHO) <sub>3</sub> ][B(3,5-(CF <sub>3</sub> ) <sub>2</sub> -C <sub>6</sub> H <sub>3</sub> ) <sub>4</sub> ] ( <b>6b</b> ) ..... | 49  |
| Synthesis of [(TMEDA)Zn(OCHO) <sub>2</sub> ] ( <b>7a</b> ) .....                                                                                                                   | 52  |
| Synthesis of [(TEEDA)Zn(OCHO) <sub>2</sub> ] ( <b>7b</b> ) .....                                                                                                                   | 54  |
| Synthesis of silanes .....                                                                                                                                                         | 57  |
| Catalysis of CO <sub>2</sub> Hydrosilylation .....                                                                                                                                 | 65  |
| Single Crystal X-ray Diffraction .....                                                                                                                                             | 87  |
| DFT Calculations .....                                                                                                                                                             | 92  |
| References .....                                                                                                                                                                   | 105 |

## General Remarks

All reactions were performed under dry argon atmosphere using standard Schlenk technique or under argon in a glovebox, unless otherwise stated. Prior to use, glassware were dried at 130 °C overnight. Solvents were dried, distilled and degassed using standard methods or using a *MB SPS-800* solvent purification system. TMEDA (*N,N,N',N'*-tetramethylethylenediamine) and TEEDA (*N,N,N',N'*-tetraethylethylenediamine) were purchased from Sigma-Aldrich.  $[\text{ZnH}_2]_n$ ,<sup>[S1]</sup>  $[\text{NEt}_3\text{H}][\text{B}(3,5\text{-(CF}_3)_2\text{C}_6\text{H}_3)_4]$ ,<sup>[S2]</sup>  $\text{Et}_3\text{SiH}$ ,<sup>[S3]</sup> and  $\text{B}(3,5\text{-(CF}_3)_2\text{C}_6\text{H}_3)_3$ <sup>[S4]</sup> were synthesized following literature procedures.  $^1\text{H}$ ,  $^{13}\text{C}\{^1\text{H}\}$ ,  $^{11}\text{B}\{^1\text{H}\}$ ,  $^{19}\text{F}\{^1\text{H}\}$  and  $^{29}\text{Si}\{^1\text{H}\}$  NMR spectra were recorded on a *Bruker Avance II 400* or *Bruker Avance III HD 400* spectrometer in J. Young style NMR tubes at ambient temperature unless otherwise stated. Chemical shifts ( $\delta$  in ppm) in the  $^1\text{H}$  and  $^{13}\text{C}\{^1\text{H}\}$  NMR spectra were referenced internally to the residual signals of the deuterated solvents. Chemical shifts in the  $^{11}\text{B}\{^1\text{H}\}$  and  $^{29}\text{Si}\{^1\text{H}\}$  spectra were referenced externally to  $\text{BF}_3(\text{OEt}_2)$  or tetramethylsilane, respectively. The resonances in the  $^1\text{H}$  and  $^{13}\text{C}\{^1\text{H}\}$  NMR spectra were assigned based on two-dimensional NMR experiments (COSY, HSQC, HMBC). Abbreviations for multiplicities of NMR signals are as follows: s (singlet), d (doublet), t (triplet), q (quartet), sep (septet), br (broad). IR spectra were recorded as KBr pellets using an *AVATAR 360 FT-IR* spectrometer. Elemental analysis were performed on an *elementar vario EL* machine.

## Experimental Procedures and Spectroscopic Data

### Synthesis of [(TMEDA)H][B(3,5-(CF<sub>3</sub>)<sub>2</sub>-C<sub>6</sub>H<sub>3</sub>)<sub>4</sub>] (1a).

To a stirred solution of [NEt<sub>3</sub>H][B(3,5-(CF<sub>3</sub>)<sub>2</sub>-C<sub>6</sub>H<sub>3</sub>)<sub>4</sub>] (1.50 g, 1.55 mmol) in Et<sub>2</sub>O (5 mL) was added dropwise TMEDA (0.27 g, 2.32 mmol) in Et<sub>2</sub>O (2 mL) and the mixture was stirred overnight at room temperature. The solution was concentrated *in vacuo*. Addition of *n*-pentane resulted in the precipitation of a solid. The supernatant was decanted off, the residue was washed with *n*-pentane (2 × 3 mL) and dried *in vacuo* to give [(TMEDA)H][B(3,5-(CF<sub>3</sub>)<sub>2</sub>-C<sub>6</sub>H<sub>3</sub>)<sub>4</sub>] as colorless solid (1.50 g, 1.52 mmol). Yield: 98%.

<sup>1</sup>H NMR (400 MHz, [D<sub>3</sub>]acetonitrile): δ = 2.46 (s, N-CH<sub>3</sub>, 12H), 2.75 (s, N-CH<sub>2</sub>, 4H), 3.64 (br, NH, 1H), 7.67 (s, *para*-C<sub>6</sub>H<sub>3</sub>, 4H), 7.69 (s, *ortho*-C<sub>6</sub>H<sub>3</sub>, 8H) ppm.

<sup>13</sup>C{<sup>1</sup>H} NMR (101 MHz, [D<sub>3</sub>]acetonitrile): δ = 44.86 (N-CH<sub>3</sub>), 55.27 (N-CH<sub>2</sub>), 118.72 (*para*-C<sub>6</sub>H<sub>3</sub>), 124.16 (q, <sup>1</sup>J<sub>C-F</sub> = 271.6 Hz, CF<sub>3</sub>), 130.08 (qq, <sup>2</sup>J<sub>C-F</sub> = 31.6 Hz, <sup>3</sup>J<sub>C-B</sub> = 2.8 Hz, *meta*-C<sub>6</sub>H<sub>3</sub>), 135.70 (*ortho*-C<sub>6</sub>H<sub>3</sub>), 162.66 (q, <sup>1</sup>J<sub>B-C</sub> = 50.1 Hz, *ipso*-C<sub>6</sub>H<sub>3</sub>) ppm.

<sup>11</sup>B{<sup>1</sup>H} NMR (128 MHz, [D<sub>3</sub>]acetonitrile): δ = -6.67 ppm.

<sup>19</sup>F{<sup>1</sup>H} NMR (377 MHz, [D<sub>3</sub>]acetonitrile): δ = -63.27 ppm.

IR (KBr): ν = 2973 cm<sup>-1</sup> (br, NH).

Anal. Calcd. for C<sub>38</sub>H<sub>29</sub>N<sub>2</sub>BF<sub>24</sub> (980.44 g · mol<sup>-1</sup>): C, 46.55; H, 2.98; N, 2.86. Found: C, 46.77; H, 3.05; N, 3.21%.

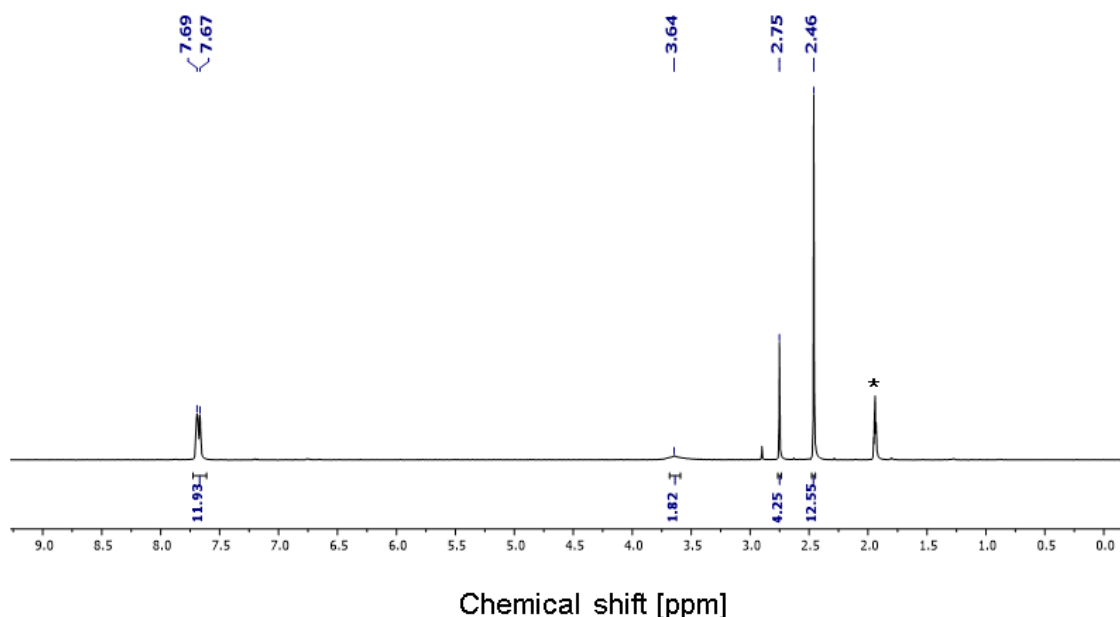

**Figure S1:** <sup>1</sup>H NMR spectrum of [(TMEDA)H][B(3,5-(CF<sub>3</sub>)<sub>2</sub>-C<sub>6</sub>H<sub>3</sub>)<sub>4</sub>] (1a) in [D<sub>3</sub>]acetonitrile (\*).

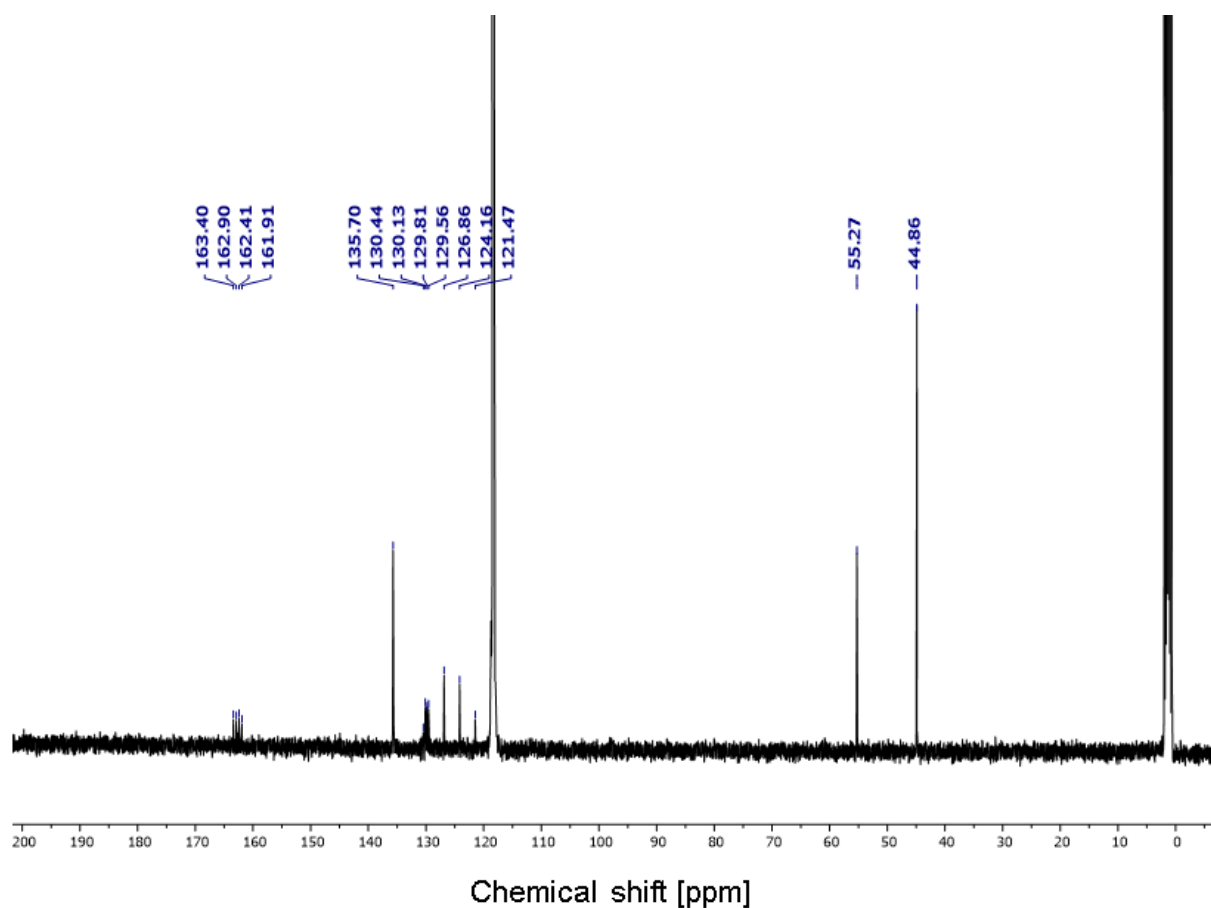

**Figure S2:**  $^{13}\text{C}\{^1\text{H}\}$  NMR spectrum of  $[(\text{TMEDA})\text{H}][\text{B}(3,5\text{-(CF}_3)_2\text{C}_6\text{H}_3)_4]$  (**1a**) in  $[\text{D}_3]$ acetonitrile.

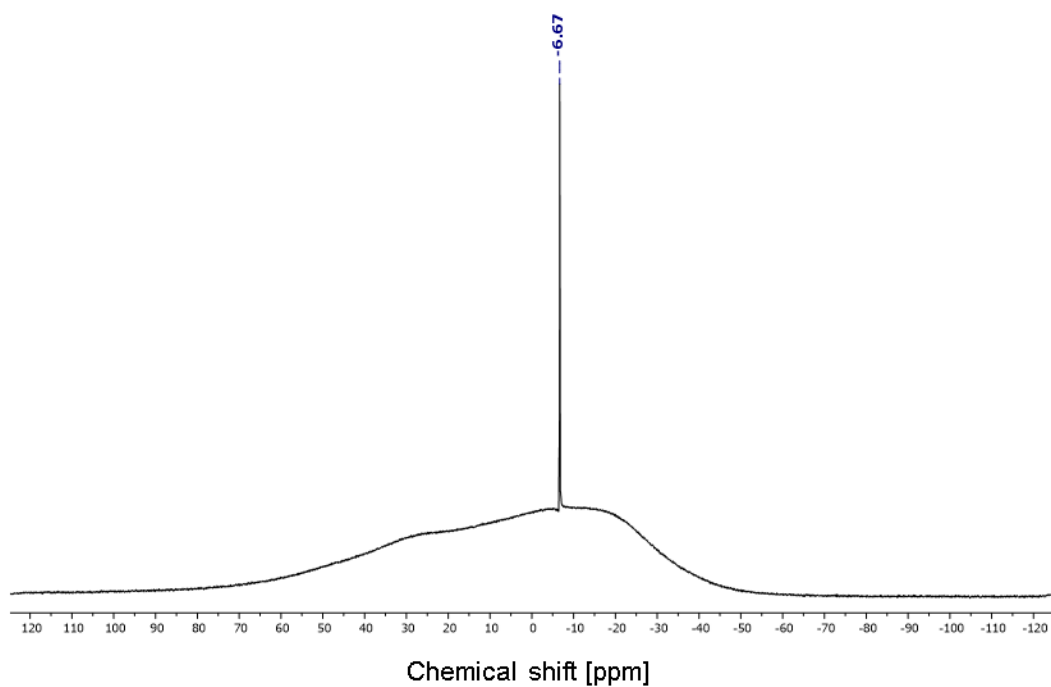

**Figure S3:**  $^{11}\text{B}\{^1\text{H}\}$  NMR spectrum of  $[(\text{TMEDA})\text{H}][\text{B}(3,5\text{-(CF}_3)_2\text{-C}_6\text{H}_3)_4]$  (**1a**) in  $[\text{D}_3]$ acetonitrile.

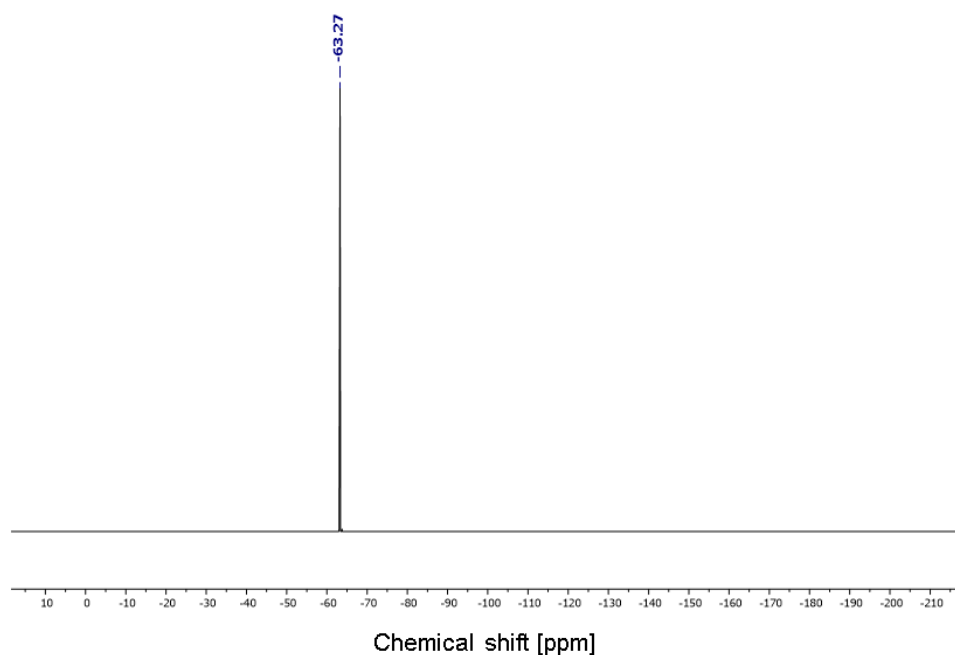

**Figure S4:**  $^{19}\text{F}\{^1\text{H}\}$  NMR spectrum of  $[(\text{TMEDA})\text{H}][\text{B}(3,5\text{-(CF}_3)_2\text{-C}_6\text{H}_3)_4]$  (**1a**) in  $[\text{D}_3]$ acetonitrile.

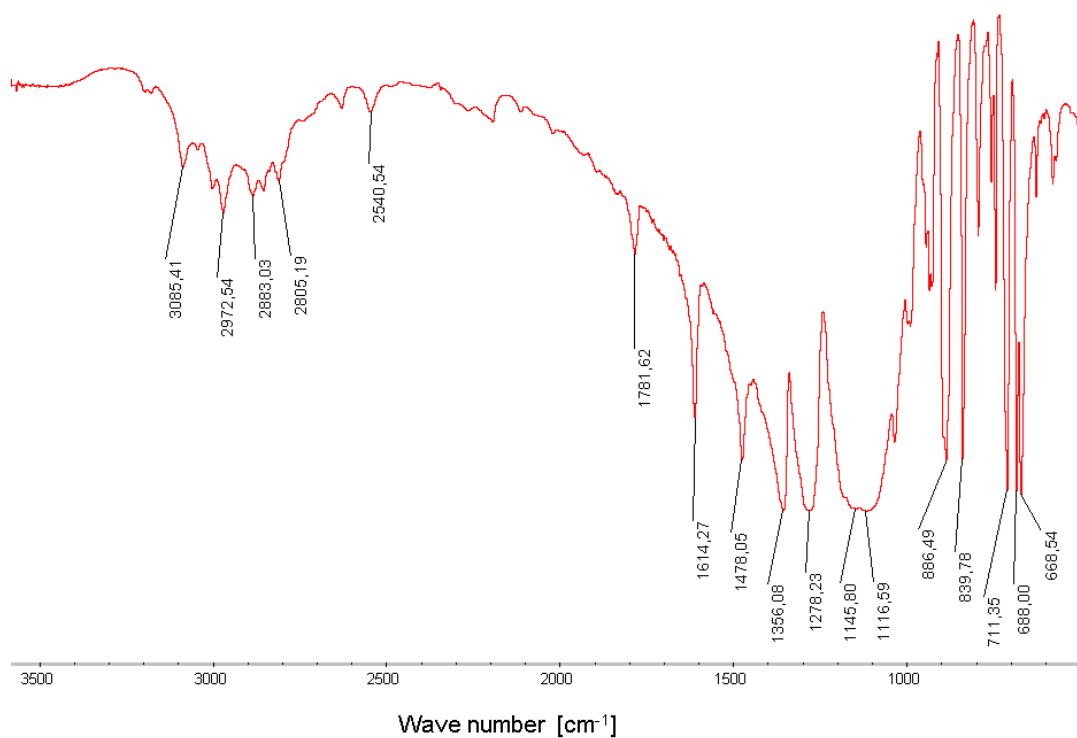

**Figure S5:** IR spectrum (KBr pellet) of  $[(\text{TMEDA})\text{H}][\text{B}(3,5\text{-(CF}_3)_2\text{-C}_6\text{H}_3)_4]$  (**1a**).

### Synthesis of $[(\text{TEEDA})\text{H}][\text{B}(3,5\text{-(CF}_3)_2\text{-C}_6\text{H}_3)_4]$ (**1b**).

To a stirred solution of  $[\text{NEt}_3\text{H}][\text{B}(3,5\text{-(CF}_3)_2\text{-C}_6\text{H}_3)_4]$  (0.500 g, 0.517 mmol) in  $\text{Et}_2\text{O}$  (5 mL) was added a solution of TEEDA (0.131 g, 0.760 mmol) in  $\text{Et}_2\text{O}$  (2 mL) and the mixture was stirred overnight at room temperature. The solution was concentrated *in vacuo*. Addition of n-pentane resulted in the precipitation of a solid. The supernatant was decanted off, the residue washed

with *n*-pentane (2 × 3 mL) and dried *in vacuo* to give [(TEEDA)H][B(3,5-(CF<sub>3</sub>)<sub>2</sub>-C<sub>6</sub>H<sub>3</sub>)<sub>4</sub>] as a colorless solid (0.523 g, 0.504 mmol). Yield: 97%.

<sup>1</sup>H NMR (400 MHz, [D<sub>3</sub>]acetonitrile): δ = 1.13 (t, <sup>3</sup>J<sub>H-H</sub> = 7.2 Hz, N-CH<sub>2</sub>CH<sub>3</sub>, 12H), 2.51 (q, <sup>3</sup>J<sub>C-H</sub> = 7.2 Hz, N-CH<sub>2</sub>CH<sub>3</sub>, 8H), 2.89 (s, N-CH<sub>2</sub>CH<sub>2</sub>, 4H), 4.92 (br, NH, 1H), 7.67 (s, *para*-C<sub>6</sub>H<sub>3</sub>, 4H), 7.70 (s, *ortho*-C<sub>6</sub>H<sub>3</sub>, 8H) ppm.

<sup>13</sup>C{<sup>1</sup>H} NMR (101 MHz, [D<sub>3</sub>]acetonitrile): δ = 10.27 (N-CH<sub>2</sub>CH<sub>3</sub>), 47.57 (N-CH<sub>2</sub>CH<sub>3</sub>), 48.75 (N-CH<sub>2</sub>), 118.71 (*para*-C<sub>6</sub>H<sub>3</sub>), 125.49 (q, <sup>1</sup>J<sub>C-F</sub> = 271.7 Hz, CF<sub>3</sub>), 129.95 (qq, <sup>2</sup>J<sub>C-F</sub> = 31.5 Hz, <sup>3</sup>J<sub>C-B</sub> = 2.8 Hz, *meta*-C<sub>6</sub>H<sub>3</sub>), 135.68 (*ortho*-C<sub>6</sub>H<sub>3</sub>), 162.63 (q, <sup>1</sup>J<sub>B-C</sub> = 49.8 Hz, *ipso*-C<sub>6</sub>H<sub>3</sub>) ppm.

<sup>13</sup>B{<sup>1</sup>H} NMR (128 MHz, [D<sub>3</sub>]acetonitrile): δ = -6.67 ppm.

<sup>19</sup>F{<sup>1</sup>H} NMR (377 MHz, [D<sub>3</sub>]acetonitrile): δ = -63.67 ppm.

IR (KBr): ν = 2976 cm<sup>-1</sup>(br, NH).

Anal. Calcd. for C<sub>42</sub>H<sub>37</sub>N<sub>2</sub>BF<sub>24</sub> (1036.54 g · mol<sup>-1</sup>): C, 48.67; H, 3.60; N, 2.70. Found: C, 48.16; H, 4.05; N, 2.94%.

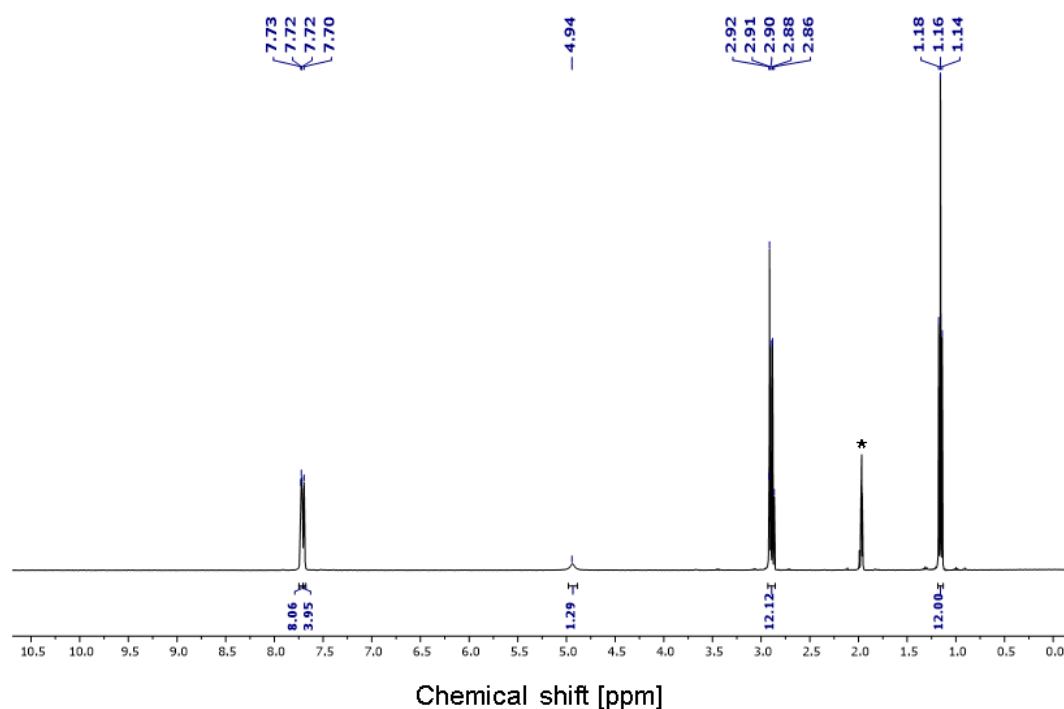

**Figure S6:** <sup>1</sup>H NMR spectrum of [(TEEDA)H][B(3,5-(CF<sub>3</sub>)<sub>2</sub>-C<sub>6</sub>H<sub>3</sub>)<sub>4</sub>] (**1b**) in [D<sub>3</sub>]acetonitrile (\*).

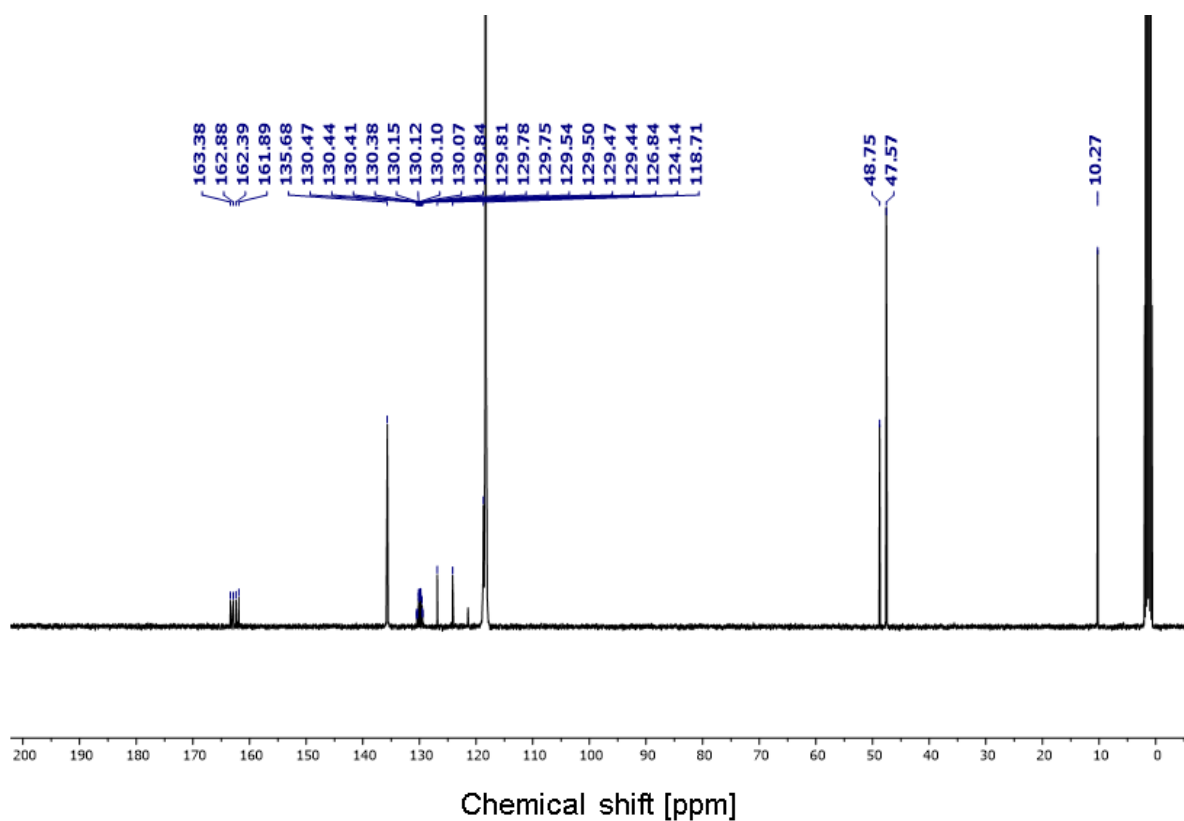

**Figure S7:**  $^{13}\text{C}\{^1\text{H}\}$  NMR spectrum of  $[(\text{TEEDA})\text{H}][\text{B}(3,5\text{-(CF}_3)_2\text{-C}_6\text{H}_3)_4]$  (**1b**) in  $[\text{D}_3]$ acetonitrile.

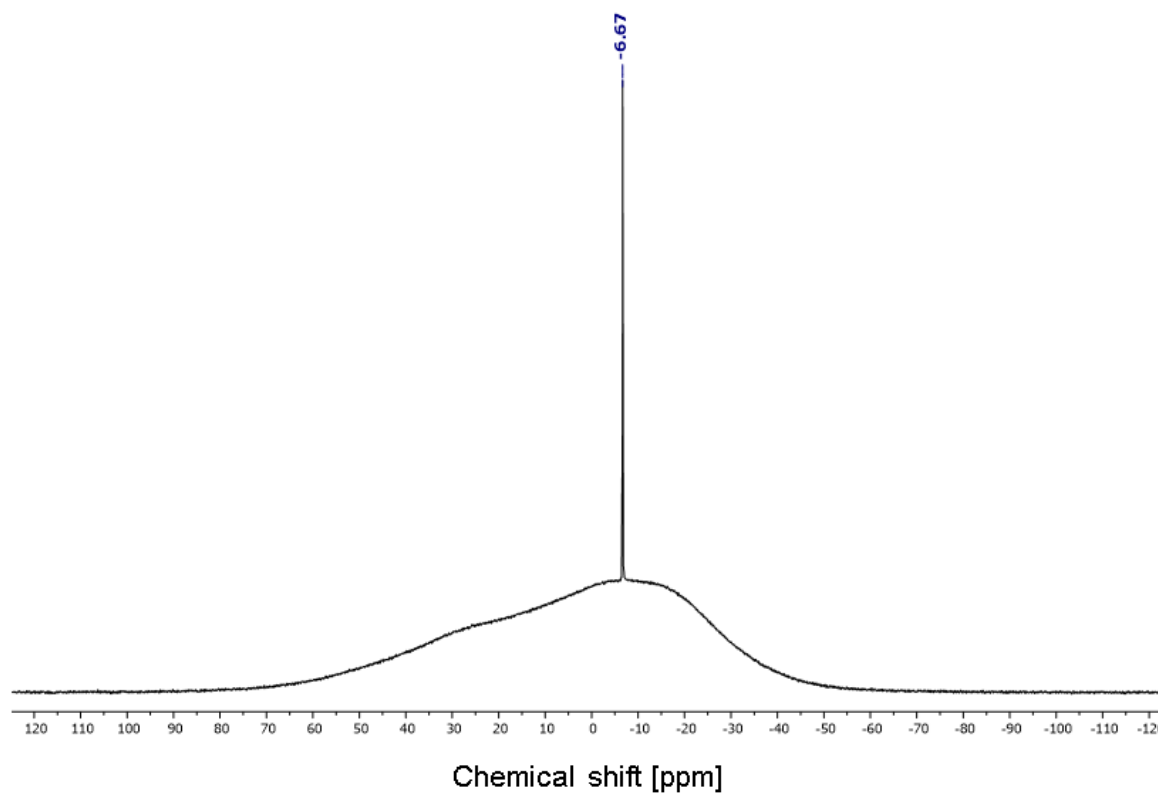

**Figure S8:**  $^{11}\text{B}\{^1\text{H}\}$  NMR spectrum of  $[(\text{TEEDA})\text{H}][\text{B}(3,5\text{-(CF}_3)_2\text{-C}_6\text{H}_3)_4]$  (**1b**) in  $[\text{D}_3]$ acetonitrile.



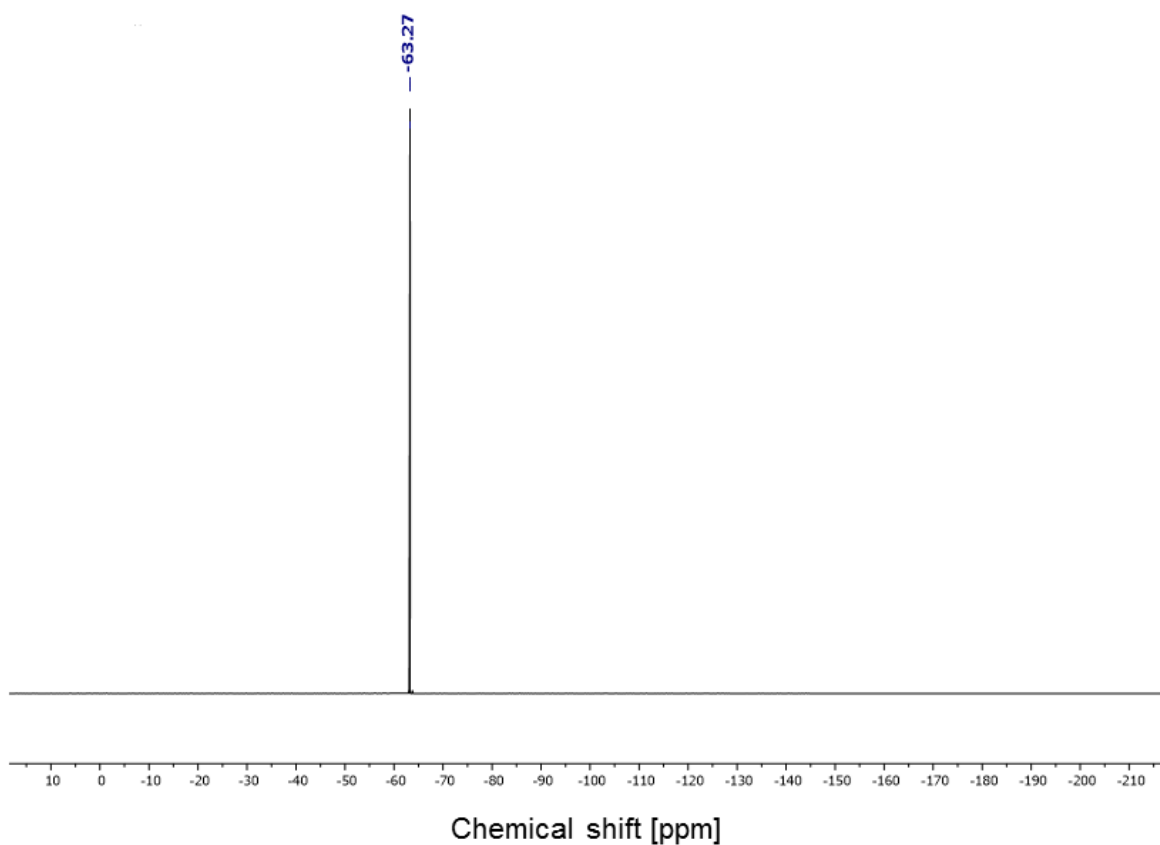

**Figure S9:**  $^{19}\text{F}\{^1\text{H}\}$  NMR spectrum of  $[(\text{TEEDA})\text{H}][\text{B}(3,5\text{-(CF}_3)_2\text{-C}_6\text{H}_3)_4]$  (**1b**) in  $[\text{D}_3]$ acetonitrile.

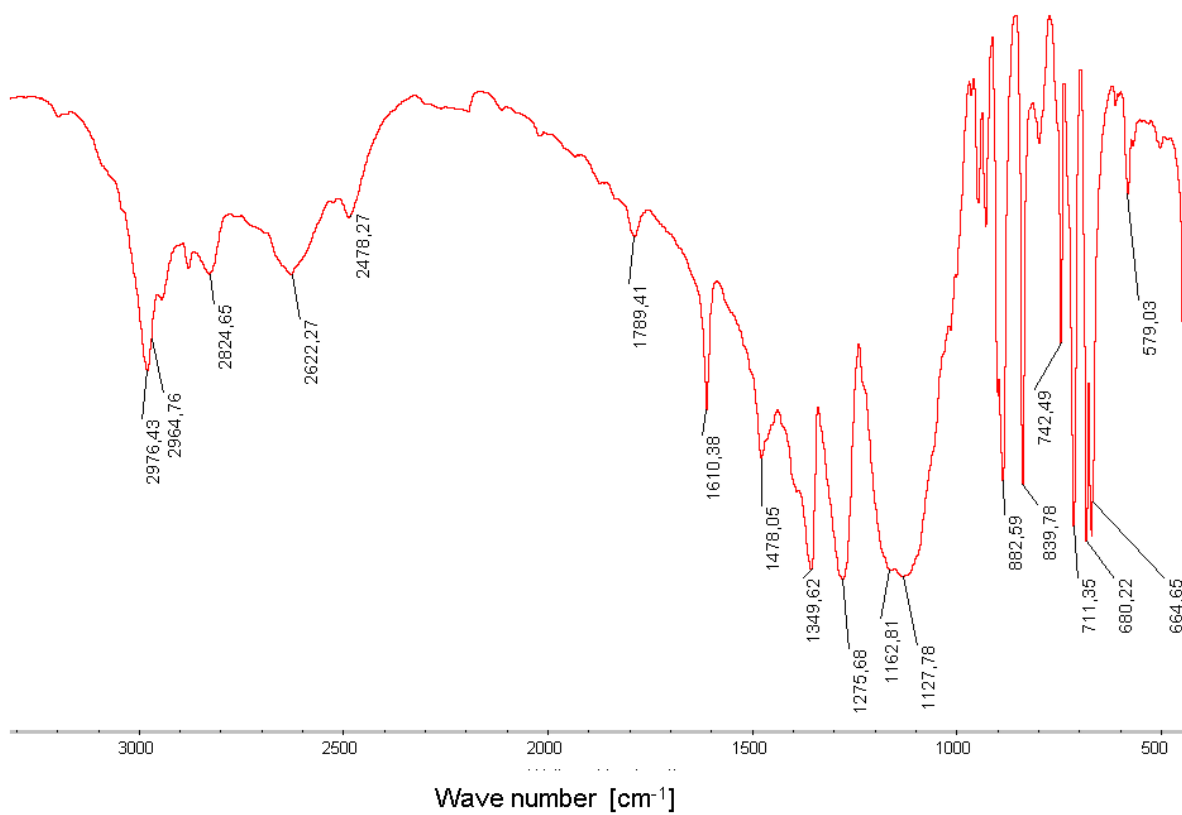

**Figure S10:** IR spectrum (KBr pellet) of  $[(\text{TEEDA})\text{H}][\text{B}(3,5\text{-(CF}_3)_2\text{-C}_6\text{H}_3)_4]$  (**1b**).

### Synthesis of [(TMEDA)ZnH(thf)][B(3,5-(CF<sub>3</sub>)<sub>2</sub>-C<sub>6</sub>H<sub>3</sub>)<sub>4</sub>] (2a).

To a suspension of [ZnH<sub>2</sub>]<sub>n</sub> (34 mg, 0.51 mmol) in THF (5 mL) was added dropwise a solution of [(TMEDA)H][B(3,5-(CF<sub>3</sub>)<sub>2</sub>-C<sub>6</sub>H<sub>3</sub>)<sub>4</sub>] (0.500 g, 0.51 mmol) in THF (5 mL) at room temperature. After gas evolution had ceased (approximately 15 min) the reaction mixture was filtered. The solution was concentrated in *vacuo* and subsequent addition of *n*-pentane resulted in the precipitation of a colorless solid. The solvent was removed by decantation. Drying under reduced pressure gave [(TMEDA)ZnH(thf)][B(3,5-(CF<sub>3</sub>)<sub>2</sub>-C<sub>6</sub>H<sub>3</sub>)<sub>4</sub>] as a colorless solid (535 mg, 0.48 mmol). Yield: 94%.

<sup>1</sup>H NMR (400 MHz, [D<sub>8</sub>]THF): δ = 1.78 (m, THF, 4H), 2.60 (s, N-CH<sub>3</sub>, 12H), 2.87 (s, N-CH<sub>2</sub>, 4H), 3.65 (m, THF, 4H), 3.68 (s, Zn-H, 1H) 7.59 (s, *para*-C<sub>6</sub>H<sub>3</sub>, 4H), 7.80 (s, *ortho*-C<sub>6</sub>H<sub>3</sub>, 8H) ppm.

<sup>13</sup>C{<sup>1</sup>H} NMR (101 MHz, [D<sub>8</sub>]THF): δ = 26.43 (thf), 47.37 (N-CH<sub>3</sub>), 57.97 (N-CH<sub>2</sub>CH<sub>2</sub>), 68.27 (thf), 118.26 (*para*-C<sub>6</sub>H<sub>3</sub>), 125.58 (q, <sup>1</sup>J<sub>C-F</sub> = 272 Hz, CF<sub>3</sub>), 130.08 (qq, <sup>2</sup>J<sub>C-F</sub> = 31.6 Hz, <sup>3</sup>J<sub>C-B</sub> = 3.5 Hz, *meta*-C<sub>6</sub>H<sub>3</sub>), 135.66 (*ortho*-C<sub>6</sub>H<sub>3</sub>), 162.88 (q, <sup>1</sup>J<sub>B-C</sub> = 50 Hz, *ipso*-C<sub>6</sub>H<sub>3</sub>).ppm.

<sup>11</sup>B{<sup>1</sup>H} NMR (128 MHz, [D<sub>8</sub>]THF): δ = -6.48 ppm.

<sup>19</sup>F{<sup>1</sup>H} NMR (377 MHz, [D<sub>8</sub>]THF): δ = 63.42 ppm.

<sup>1</sup>H NMR (400 MHz, CD<sub>2</sub>Cl<sub>2</sub>): δ = 1.99 (m, THF, 4H), 2.56 (s, N-CH<sub>3</sub>, 12H), 2.75 (s, N-CH<sub>2</sub>, 4H), 3.56 (s, Zn-H, 1H), 4.03 (m, THF, 4H), 7.58 (s, *para*-C<sub>6</sub>H<sub>3</sub>, 4H), 7.73 (s, *ortho*-C<sub>6</sub>H<sub>3</sub>, 2.1, 8H) ppm.

<sup>13</sup>C{<sup>1</sup>H} NMR (101 MHz, CD<sub>2</sub>Cl<sub>2</sub>): δ = 25.87 (THF), 47.97 (N-CH<sub>3</sub>), 57.84 (N-CH<sub>2</sub>), 72.61 (THF), 118.12 (*para*-C<sub>6</sub>H<sub>3</sub>), 125.24 (q, <sup>1</sup>J<sub>C-F</sub> = 272.4 Hz, CF<sub>3</sub>), 129.46 (qq, <sup>2</sup>J<sub>C-F</sub> = 31.5 Hz, <sup>3</sup>J<sub>C-B</sub> = 2.5 Hz, *meta*-C<sub>6</sub>H<sub>3</sub>), 135.44 (*ortho*-C<sub>6</sub>H<sub>3</sub>), 162.39 (q, <sup>1</sup>J<sub>B-C</sub> = 49.8 Hz, *ipso*-C<sub>6</sub>H<sub>3</sub>) ppm.

<sup>11</sup>B{<sup>1</sup>H} NMR (128 MHz, CD<sub>2</sub>Cl<sub>2</sub>): δ = -6.47 ppm.

<sup>19</sup>F{<sup>1</sup>H} NMR (377 MHz, CD<sub>2</sub>Cl<sub>2</sub>): δ = -63.42 ppm.

IR (KBr): ν = 1804, 1609 cm<sup>-1</sup> (m, ZnH).

Anal. Calcd. for C<sub>42</sub>H<sub>37</sub>BF<sub>24</sub>ON<sub>2</sub>Zn (1117.92 g · mol<sup>-1</sup>): C, 45.12; H, 3.34; N, 2.51. Found: C, 44.41; H, 3.68; N, 2.98%.

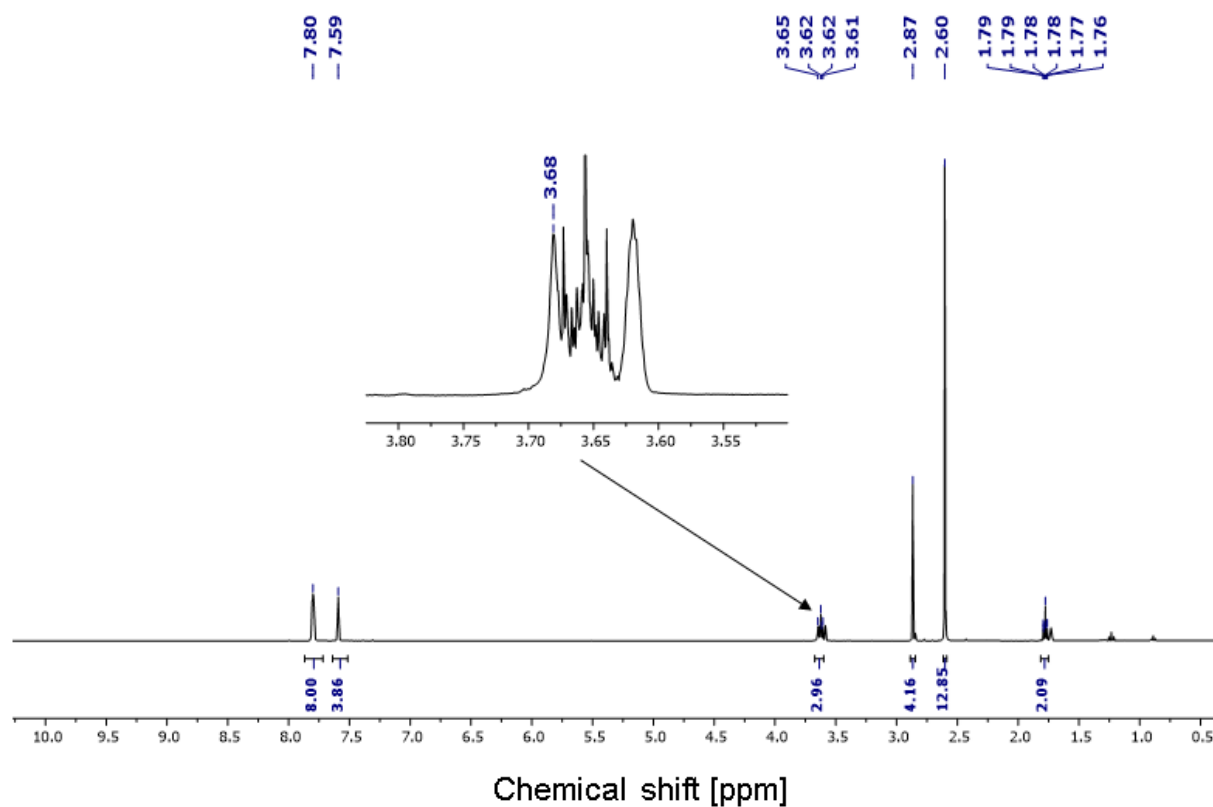

**Figure S11:**  $^1\text{H}$  NMR spectrum of  $[(\text{TMEDA})\text{ZnH}(\text{thf})][\text{B}(3,5\text{-}(\text{CF}_3)_2\text{-C}_6\text{H}_3)_4]$  (**2a**) in  $[\text{D}_8]\text{THF}$ .

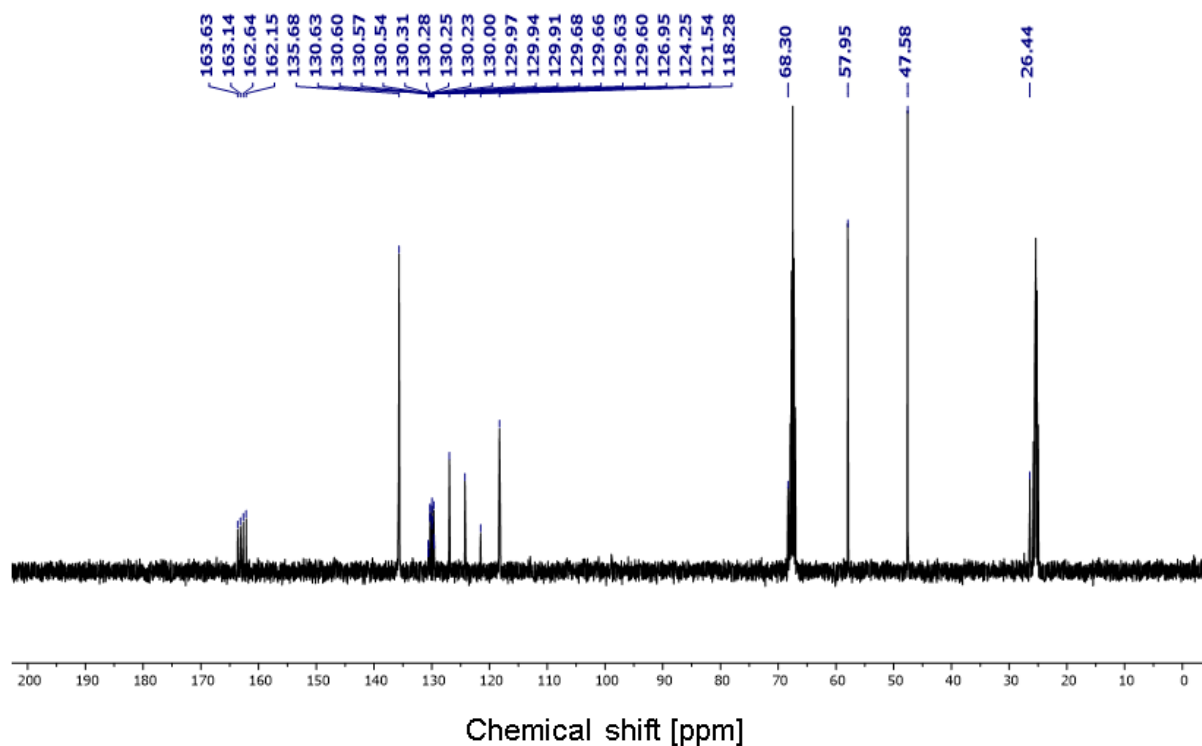

**Figure S12:**  $^{13}\text{C}\{^1\text{H}\}$  NMR spectrum of  $[(\text{TMEDA})\text{ZnH}(\text{thf})][\text{B}(3,5\text{-}(\text{CF}_3)_2\text{-C}_6\text{H}_3)_4]$  (**2a**) in  $[\text{D}_8]\text{THF}$ .

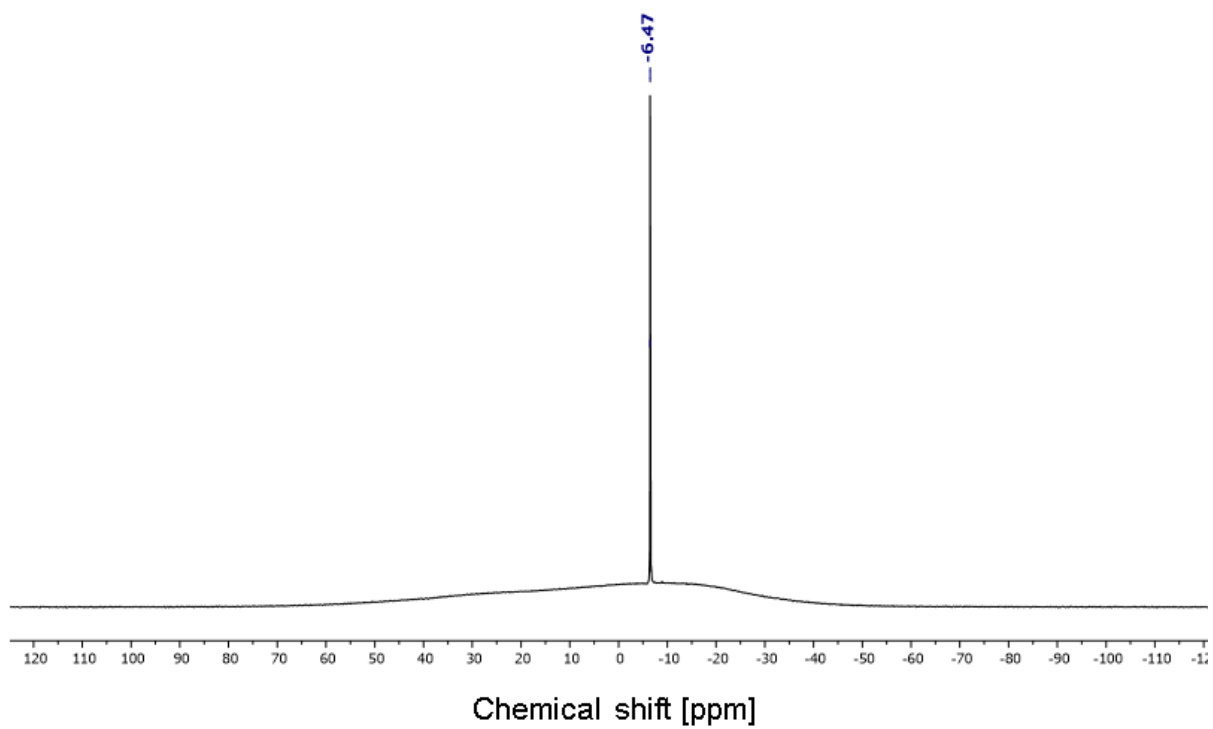

**Figure S13:**  $^{11}\text{B}\{^1\text{H}\}$  NMR spectrum of  $[(\text{TMEDA})\text{ZnH}(\text{thf})][\text{B}(3,5\text{-(CF}_3)_2\text{-C}_6\text{H}_3)_4]$  (**2a**) in  $[\text{D}_8]\text{THF}$ .

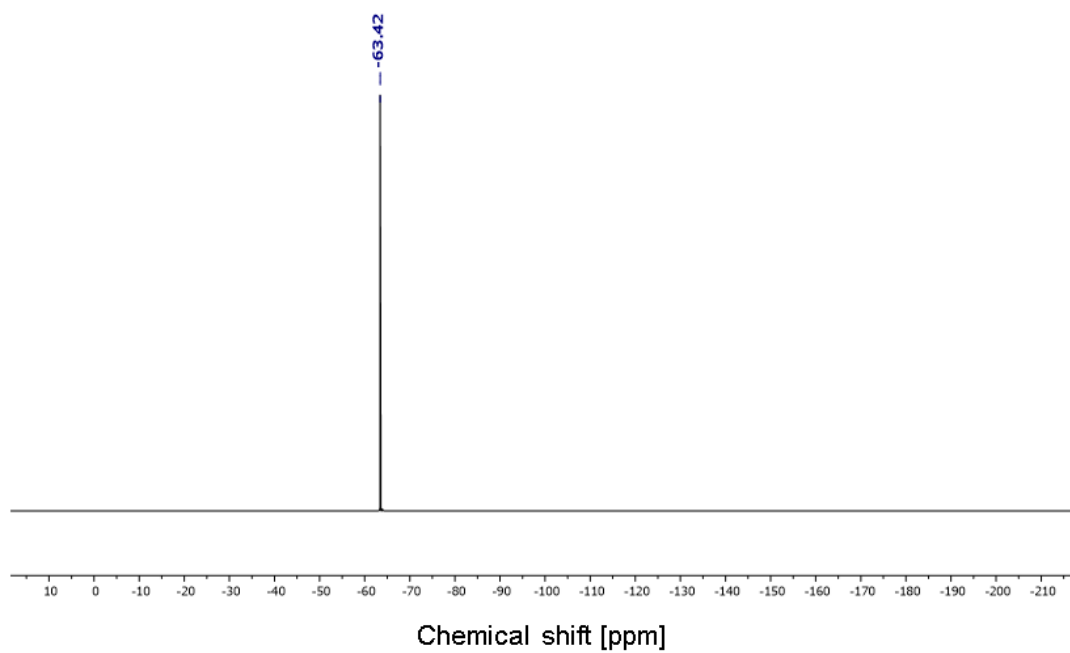

**Figure S14:**  $^{19}\text{F}\{^1\text{H}\}$  NMR spectrum of  $[(\text{TMEDA})\text{ZnH}(\text{thf})][\text{B}(3,5\text{-(CF}_3)_2\text{-C}_6\text{H}_3)_4]$  (**2a**) in  $[\text{D}_8]\text{THF}$ .

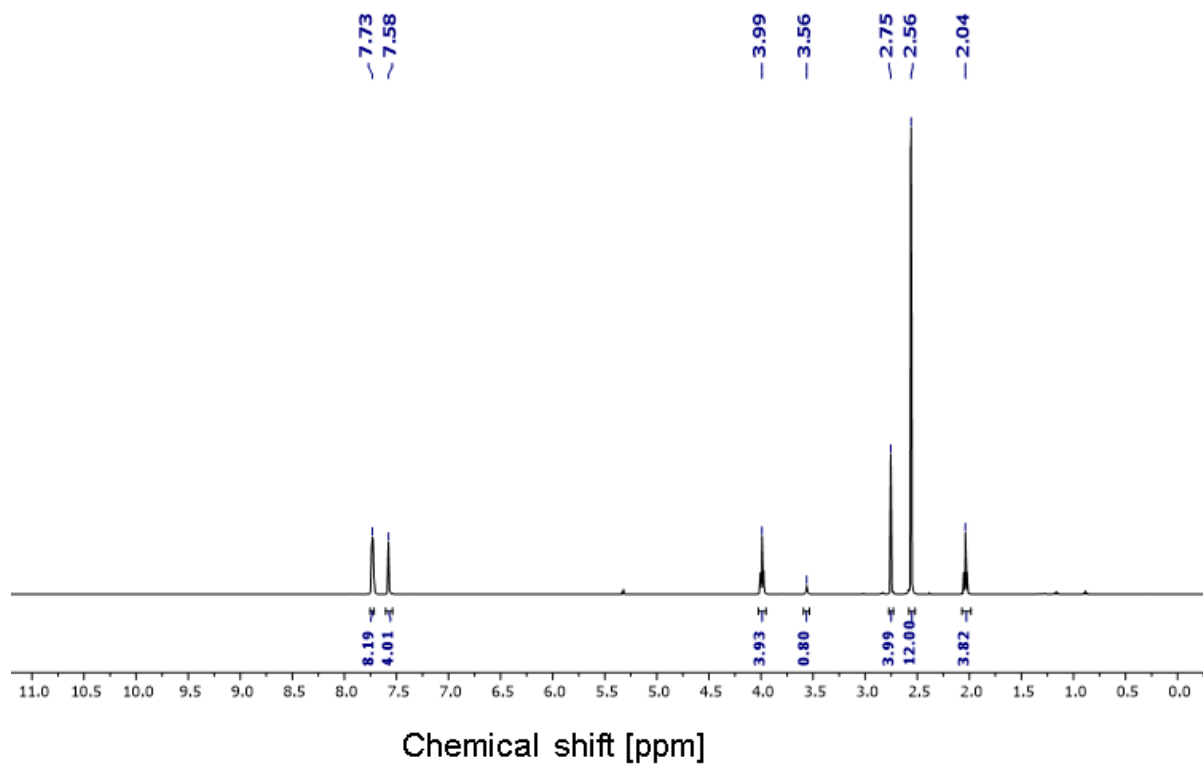

Figure S15:  $^1\text{H}$  NMR spectrum of  $[(\text{TMEDA})\text{ZnH}(\text{thf})][\text{B}(3,5\text{-(CF}_3)_2\text{-C}_6\text{H}_3)_4]$  (**2a**) in  $\text{CD}_2\text{Cl}_2$ .

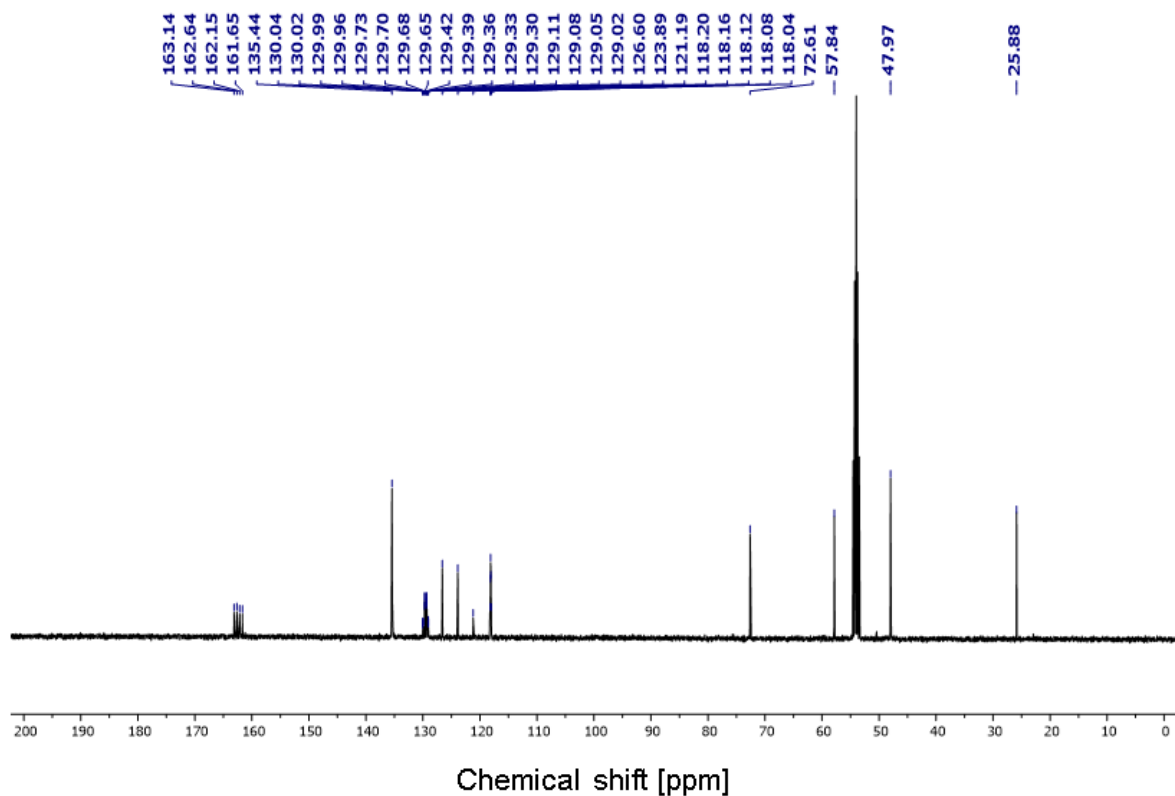

Figure S16:  $^{13}\text{C}\{^1\text{H}\}$  NMR spectrum of  $[(\text{TMEDA})\text{ZnH}(\text{thf})][\text{B}(3,5\text{-(CF}_3)_2\text{-C}_6\text{H}_3)_4]$  (**2a**) in  $\text{CD}_2\text{Cl}_2$ .

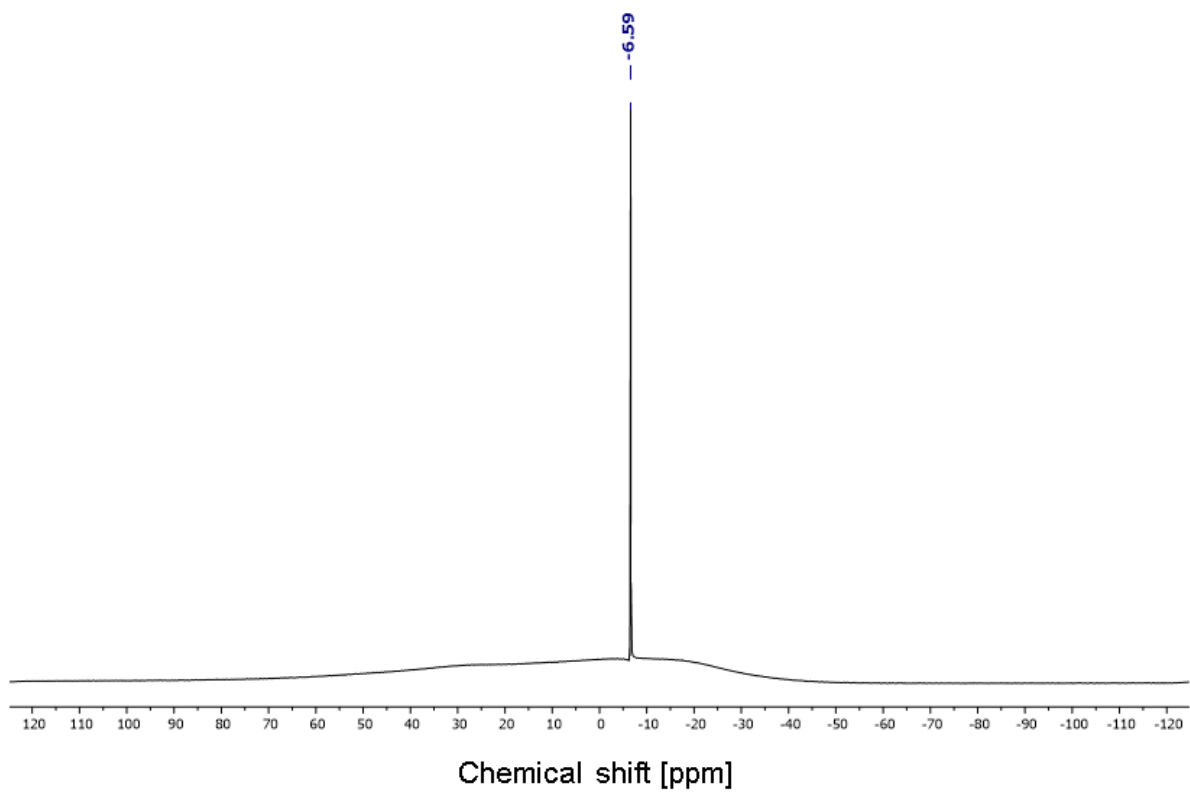

**Figure S17:**  $^{11}\text{B}\{^1\text{H}\}$  NMR spectrum of  $[(\text{TMEDA})\text{ZnH}(\text{thf})][\text{B}(3,5\text{-(CF}_3)_2\text{-C}_6\text{H}_3)_4]$  (**2a**) in  $\text{CD}_2\text{Cl}_2$ .

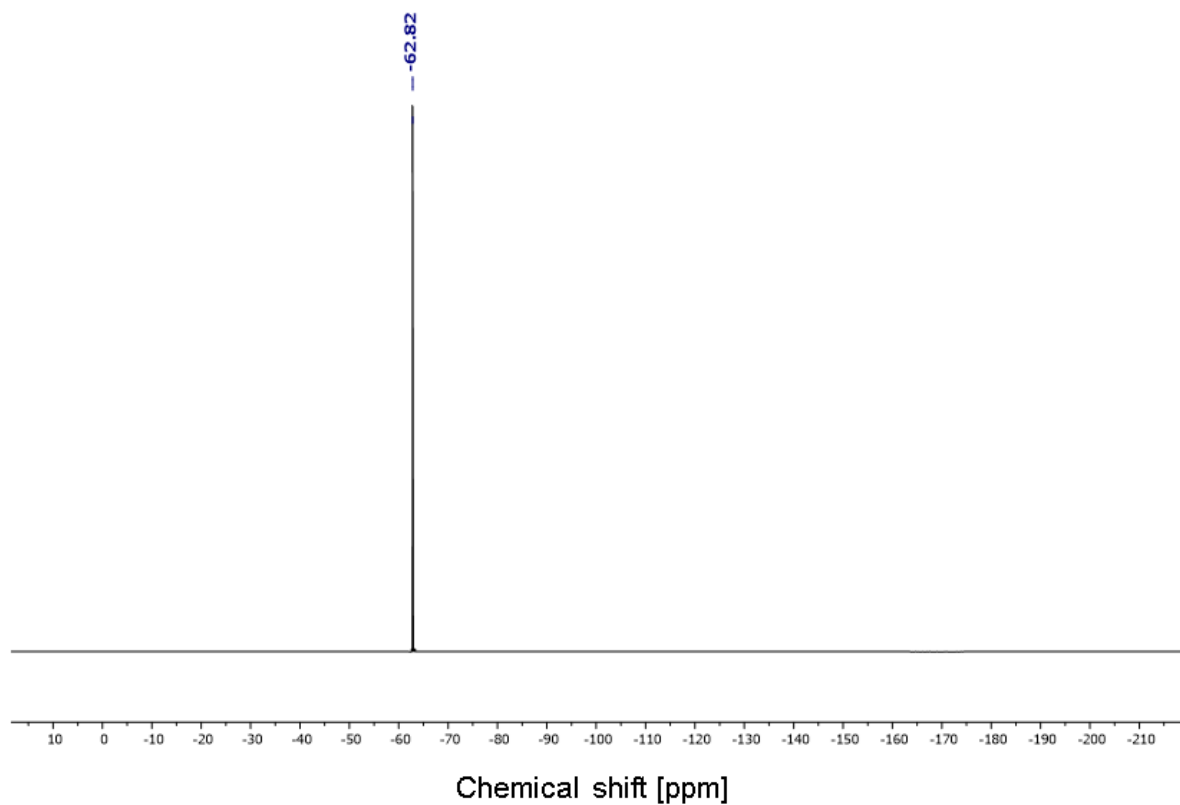

**Figure S18:**  $^{19}\text{F}\{^1\text{H}\}$  NMR spectrum of  $[(\text{TMEDA})\text{ZnH}(\text{thf})][\text{B}(3,5\text{-(CF}_3)_2\text{-C}_6\text{H}_3)_4]$  (**2a**) in  $\text{CD}_2\text{Cl}_2$ .

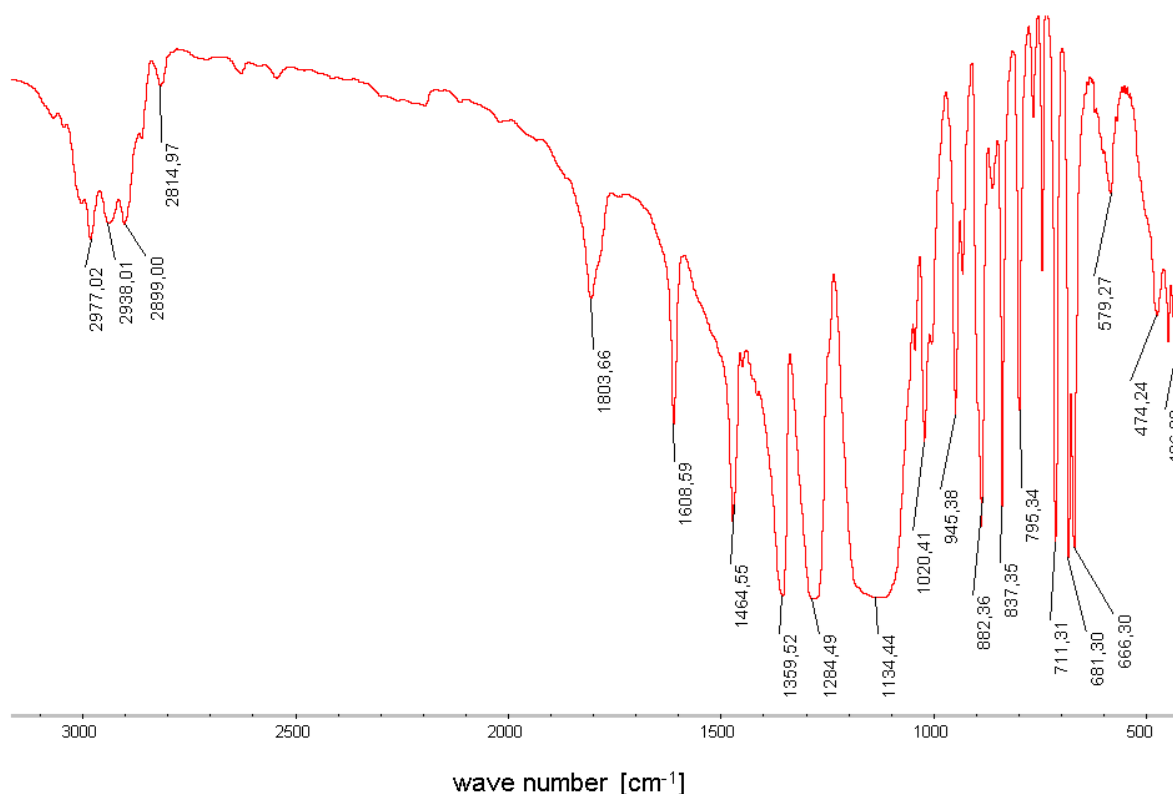

**Figure S19:** IR spectrum (KBr pellet) of [(TMEDA)ZnH(thf)][B(3,5-(CF<sub>3</sub>)<sub>2</sub>-C<sub>6</sub>H<sub>3</sub>)] (**2a**).

### Synthesis of [(TEEDA)ZnH]<sub>2</sub>[B(3,5-(CF<sub>3</sub>)<sub>2</sub>-C<sub>6</sub>H<sub>3</sub>)<sub>4</sub>]<sub>2</sub> (**2b**).

To a suspension of [ZnH<sub>2</sub>]<sub>n</sub> (26 mg, 385 μmol) in THF (5 mL) was added dropwise a solution of [(TEEDA)H][B(3,5-(CF<sub>3</sub>)<sub>2</sub>-C<sub>6</sub>H<sub>3</sub>)] (400 mg, 385 μmol) in THF (5 mL) at room temperature. After gas evolution had ceased (approximately 15 min) the reaction mixture was filtered and the solvent volume reduced in *vacuo*. Addition of *n*-pentane resulted in the precipitation of a colorless solid which could be isolated by decantation and subsequent drying under reduced pressure. The title complex was recrystallized by layering a solution of [(TEEDA)ZnH]<sub>2</sub>[B(3,5-(CF<sub>3</sub>)<sub>2</sub>-C<sub>6</sub>H<sub>3</sub>)<sub>4</sub>]<sub>2</sub> in CD<sub>2</sub>Cl<sub>2</sub> with *n*-pentane at -30 °C to give colorless crystals (392 mg, 355 μmol). Yield: 92%.

<sup>1</sup>H NMR (400 MHz, [D<sub>8</sub>]THF): δ = 1.17 (t, <sup>3</sup>J<sub>H-H</sub> = 7.2 Hz, N-CH<sub>2</sub>CH<sub>3</sub>, 24H), 2.84 – 2.95 (AA'BB', N-CH<sub>2</sub>CH<sub>3</sub>, 8H), 2.96 (s, N-CH<sub>2</sub>CH<sub>2</sub>, 8H), 2.98 – 3.11 (AA'BB', N-CH<sub>2</sub>CH<sub>3</sub>, 8H), 3.73 (s, Zn-H, 2H), 7.59 (s, *para*-C<sub>6</sub>H<sub>3</sub>, 8H), 7.80 (s, *ortho*-C<sub>6</sub>H<sub>3</sub>, 16H) ppm.

<sup>13</sup>C{<sup>1</sup>H} NMR (101 MHz, [D<sub>8</sub>]THF): δ = 8.87 (N-CH<sub>2</sub>CH<sub>3</sub>), 46.97 (N-CH<sub>2</sub>CH<sub>3</sub>), 51.64 (N-CH<sub>2</sub>CH<sub>2</sub>), 118.28 (*para*-C<sub>6</sub>H<sub>3</sub>), 125.61 (q, <sup>1</sup>J<sub>C-F</sub> = 272.2 Hz, CF<sub>3</sub>), 129.99 (qq, <sup>2</sup>J<sub>C-F</sub> = 31.52 Hz, <sup>3</sup>J<sub>C-B</sub> = 2.81 Hz, *meta*-C<sub>6</sub>H<sub>3</sub>), 135.69 (*ortho*-C<sub>6</sub>H<sub>3</sub>), 162.89 (q, <sup>1</sup>J<sub>B-C</sub> = 49.9 Hz, *ipso*-C<sub>6</sub>H<sub>3</sub>) ppm.

<sup>11</sup>B{<sup>1</sup>H} NMR (128 MHz, [D<sub>8</sub>]THF): δ = -6.50 ppm.

<sup>19</sup>F{<sup>1</sup>H} NMR (377 MHz, [D<sub>8</sub>]THF): δ = -63.44 ppm.

$^1\text{H}$  NMR (400 MHz,  $\text{CD}_2\text{Cl}_2$ ):  $\delta$  = 1.23 (t,  $^3J_{\text{H-H}} = 7.2$  Hz, N- $\text{CH}_2\text{CH}_3$ , 24H), 2.95 (p,  $^3J_{\text{H-H}} = 7.1$  Hz, N- $\text{CH}_2\text{CH}_3$ , 16H), 3.03 (s, N- $\text{CH}_2\text{CH}_2$ , 8H), 4.28 (s, Zn-H, 2H), 7.58 (s, *para*- $\text{C}_6\text{H}_3$ , 8H), 7.73 (s, *ortho*- $\text{C}_6\text{H}_3$ , 16H). ppm.

$^{13}\text{C}\{^1\text{H}\}$  NMR (101 MHz,  $\text{CD}_2\text{Cl}_2$ ):  $\delta$  = 10.92 87 (N- $\text{CH}_2\text{CH}_3$ ), 50.14 (N- $\text{CH}_2\text{CH}_3$ ), 51.64 (N- $\text{CH}_2\text{CH}_2$ ), 118.12 (*para*- $\text{C}_6\text{H}_3$ ), 125.24 (q,  $^1J_{\text{C-F}} = 272.4$  Hz,  $\text{CF}_3$ ), 129.50 (qq,  $^2J_{\text{C-F}} = 31.66$  Hz,  $^3J_{\text{C-B}} = 2.90$  Hz, *meta*- $\text{C}_6\text{H}_3$ ), 135.44 (*ortho*- $\text{C}_6\text{H}_3$ ), 162.37 (q,  $^1J_{\text{B-C}} = 49.9$  Hz, *ipso*- $\text{C}_6\text{H}_3$ ) ppm.

$^{11}\text{B}\{^1\text{H}\}$  NMR (128 MHz,  $\text{CD}_2\text{Cl}_2$ ):  $\delta$  = -6.60 ppm.

$^{19}\text{F}\{^1\text{H}\}$  NMR (377 MHz,  $\text{CD}_2\text{Cl}_2$ ):  $\delta$  = -63.44 pp.

IR (KBr):  $\nu$  = 1798, 1607  $\text{cm}^{-1}$  (m, ZnH).

Anal. Calcd. for  $\text{C}_{84}\text{H}_{74}\text{B}_2\text{F}_{48}\text{N}_4\text{Zn}_2$  (2203.85  $\text{g} \cdot \text{mol}^{-1}$ ): C, 45.78; H, 3.38; N, 2.54. Found: C, 44.42; H, 4.82; N, 3.32%.

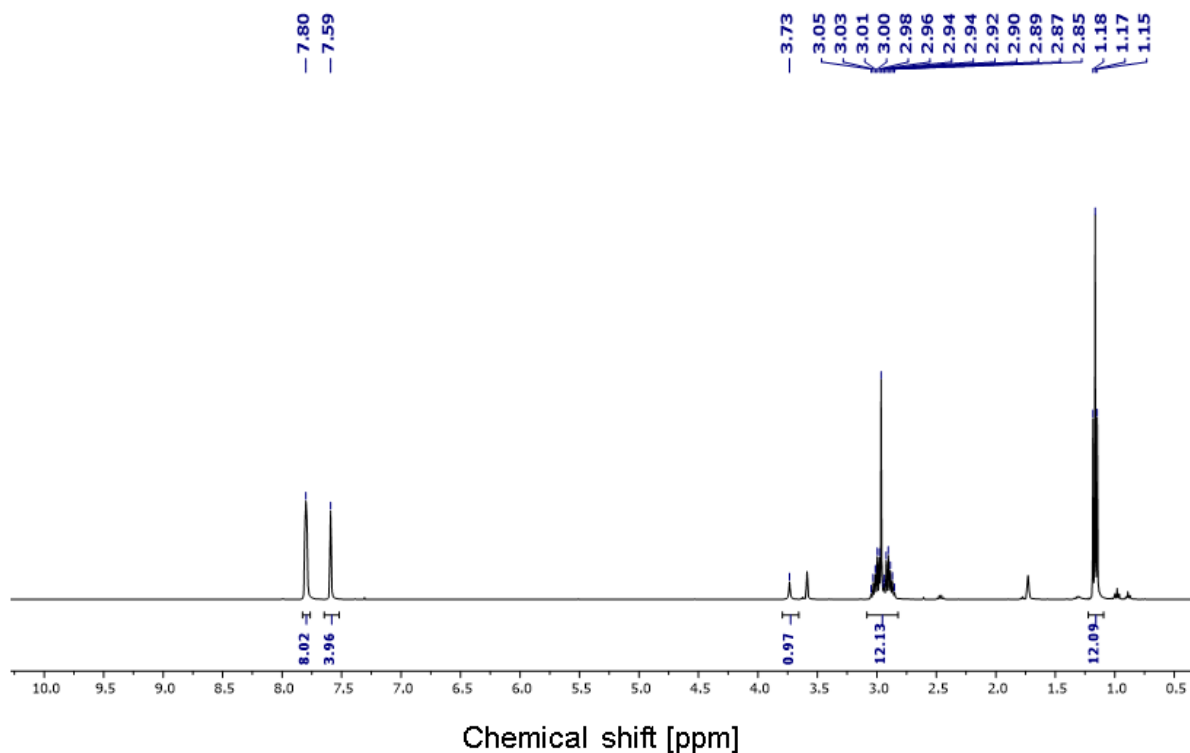

**Figure S20:**  $^1\text{H}$  NMR spectrum of  $[(\text{TEEDA})\text{ZnH}]_2[\text{B}(3,5\text{-(CF}_3)_2\text{-C}_6\text{H}_3)_4]_2$  (**2b**) in  $[\text{D}_8]\text{THF}$ .



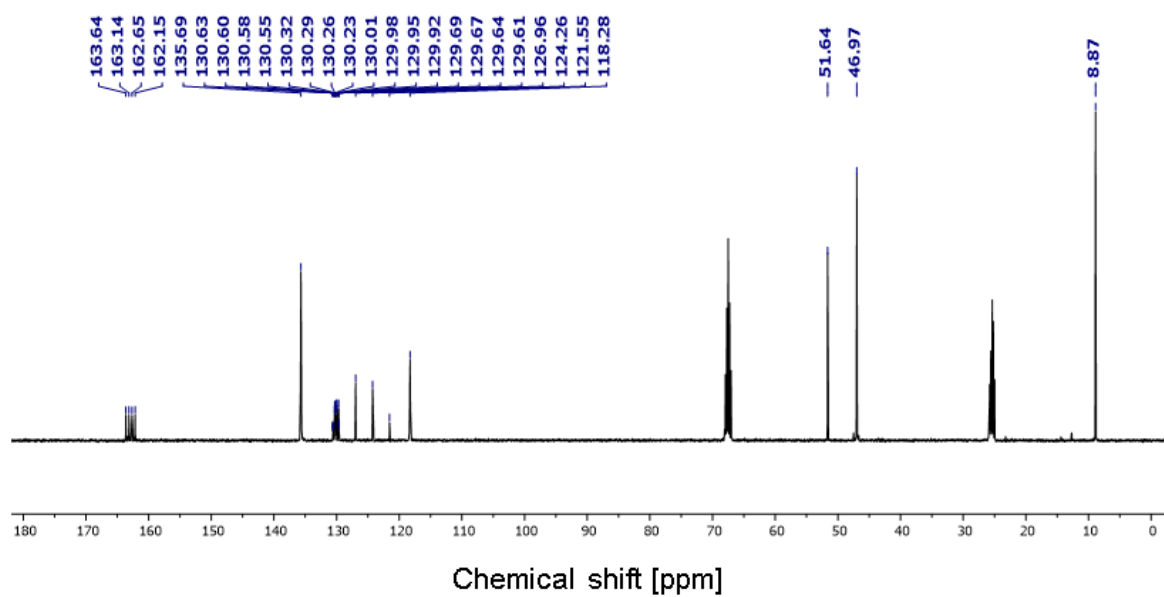

**Figure S21:**  $^{13}\text{C}\{^1\text{H}\}$  NMR spectrum of  $[(\text{TEEDA})\text{ZnH}]_2[\text{B}(3,5\text{-(CF}_3)_2\text{-C}_6\text{H}_3)_4]_2$  (**2b**) in  $[\text{D}_8]\text{THF}$ .

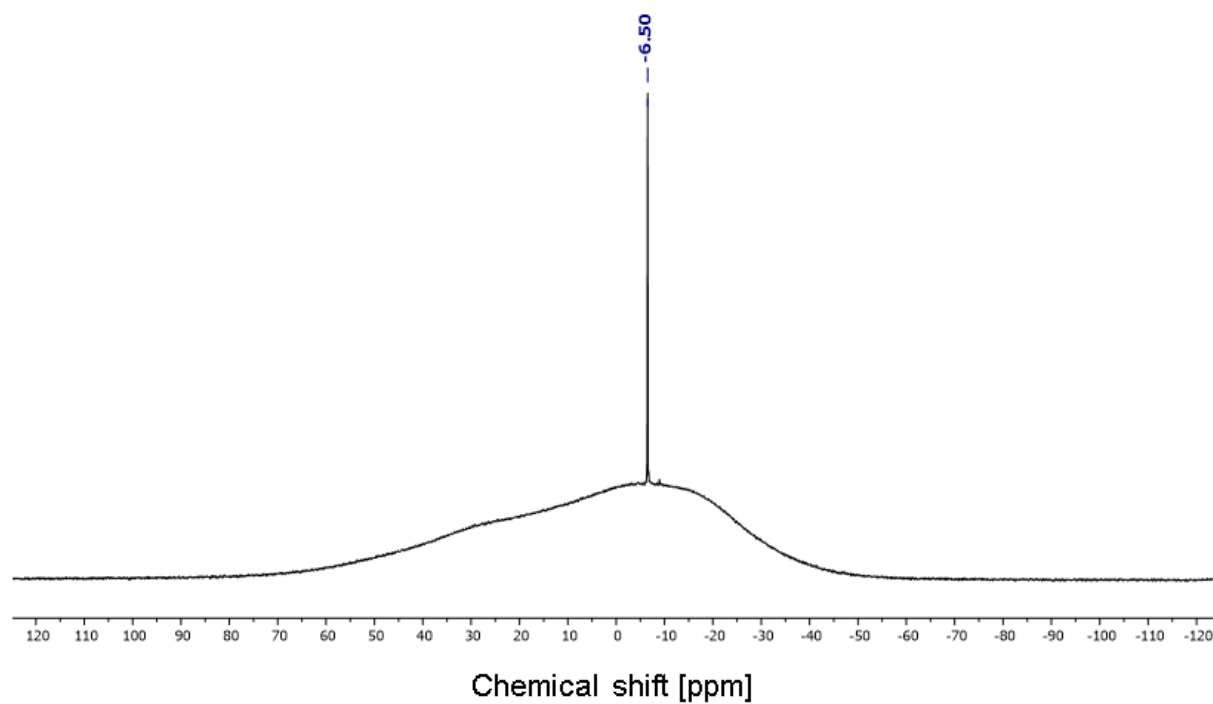

**Figure S22:**  $^{11}\text{B}\{^1\text{H}\}$  NMR spectrum of  $[(\text{TEEDA})\text{ZnH}]_2[\text{B}(3,5\text{-(CF}_3)_2\text{-C}_6\text{H}_3)_4]_2$  (**2b**) in  $[\text{D}_8]\text{THF}$ .

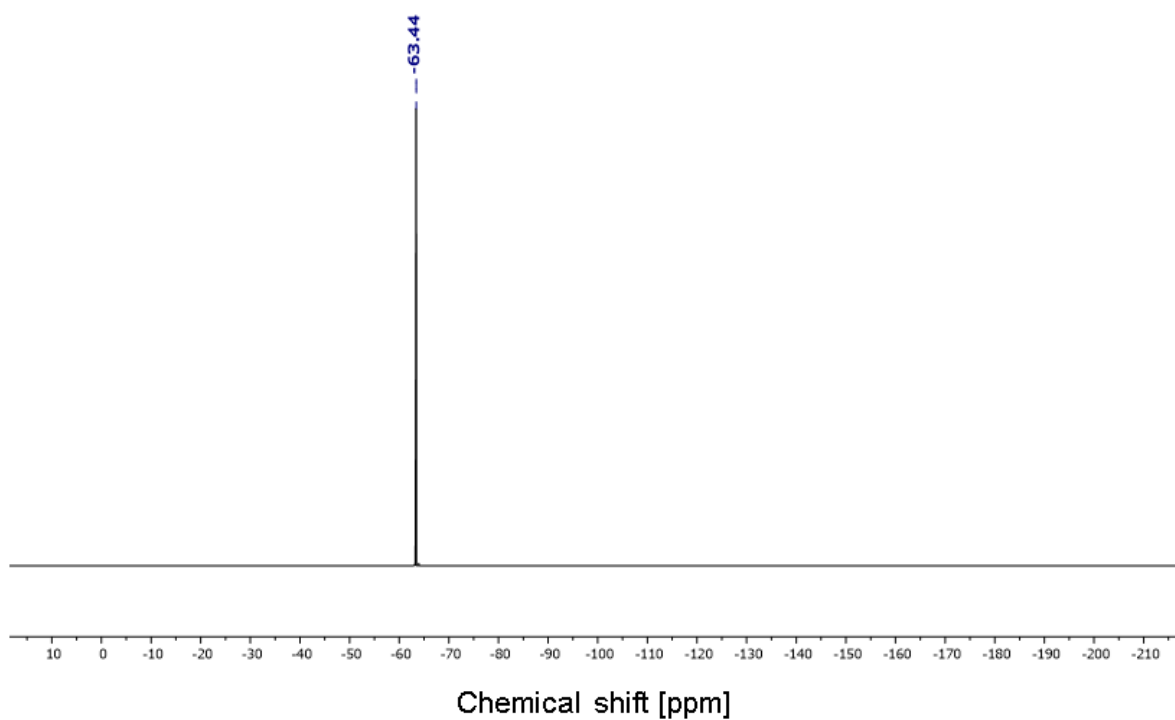

**Figure S23:**  $^{19}\text{F}\{^1\text{H}\}$  NMR spectrum of  $[(\text{TEEDA})\text{ZnH}]_2[\text{B}(3,5\text{-(CF}_3)_2\text{-C}_6\text{H}_3)_4]_2$  (**2b**) in  $[\text{D}_8]\text{THF}$ .

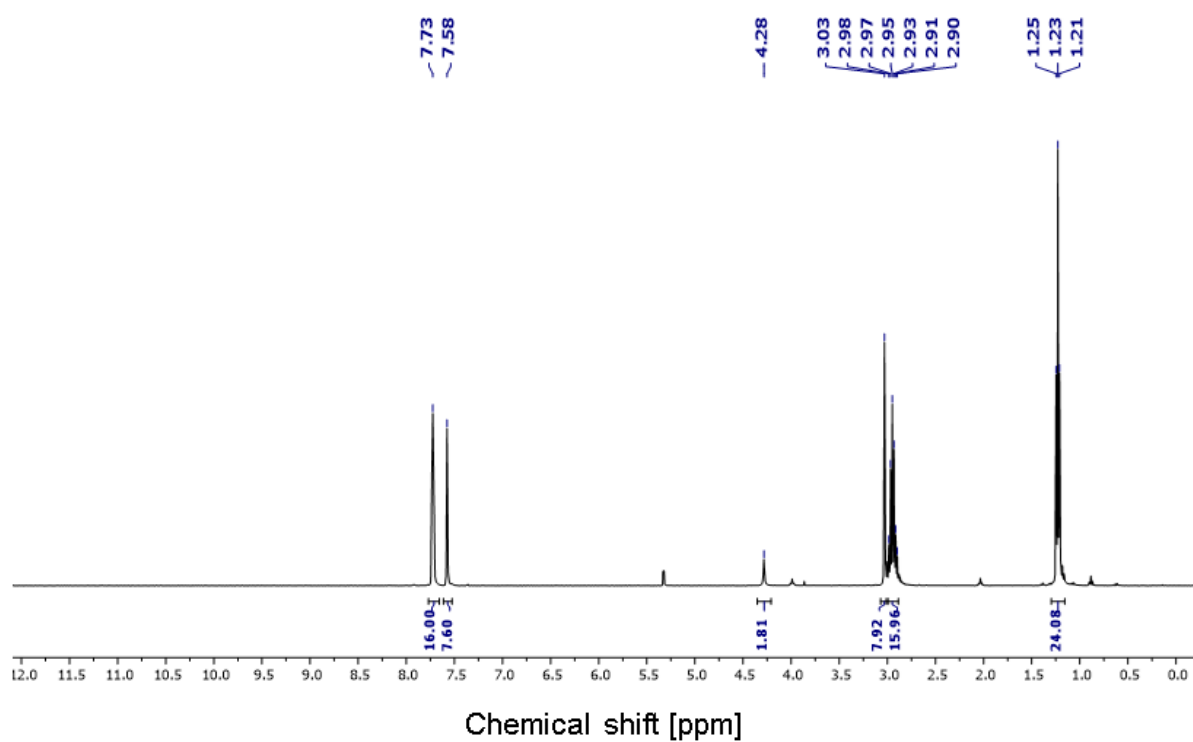

**Figure S24:**  $^1\text{H}$  NMR spectrum of  $[(\text{TEEDA})\text{ZnH}]_2[\text{B}(3,5\text{-(CF}_3)_2\text{-C}_6\text{H}_3)_4]_2$  (**2b**) in  $\text{CD}_2\text{Cl}_2$ .

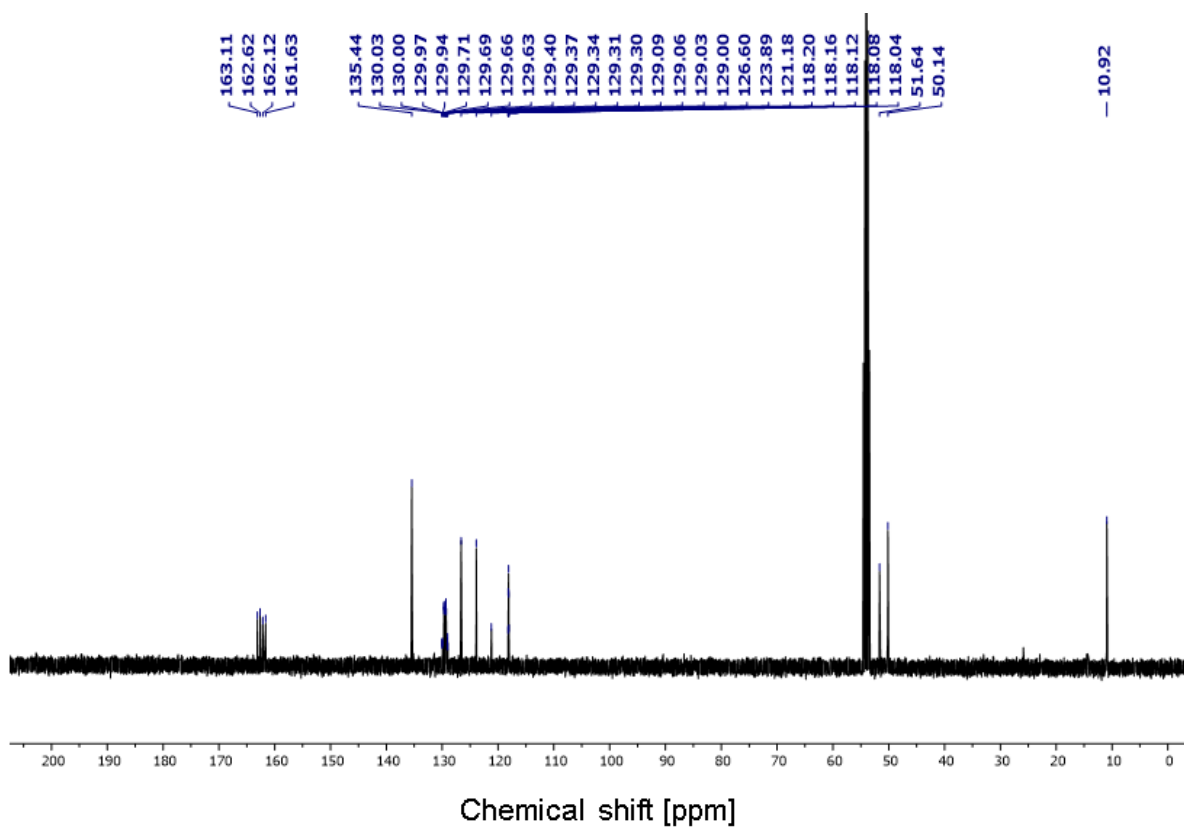

**Figure S25:**  $^{13}\text{C}\{^1\text{H}\}$  NMR spectrum of  $[(\text{TEEDA})\text{ZnH}]_2[\text{B}(3,5\text{-(CF}_3)_2\text{-C}_6\text{H}_3)_4]_2$  (**2b**) in  $\text{CD}_2\text{Cl}_2$ .

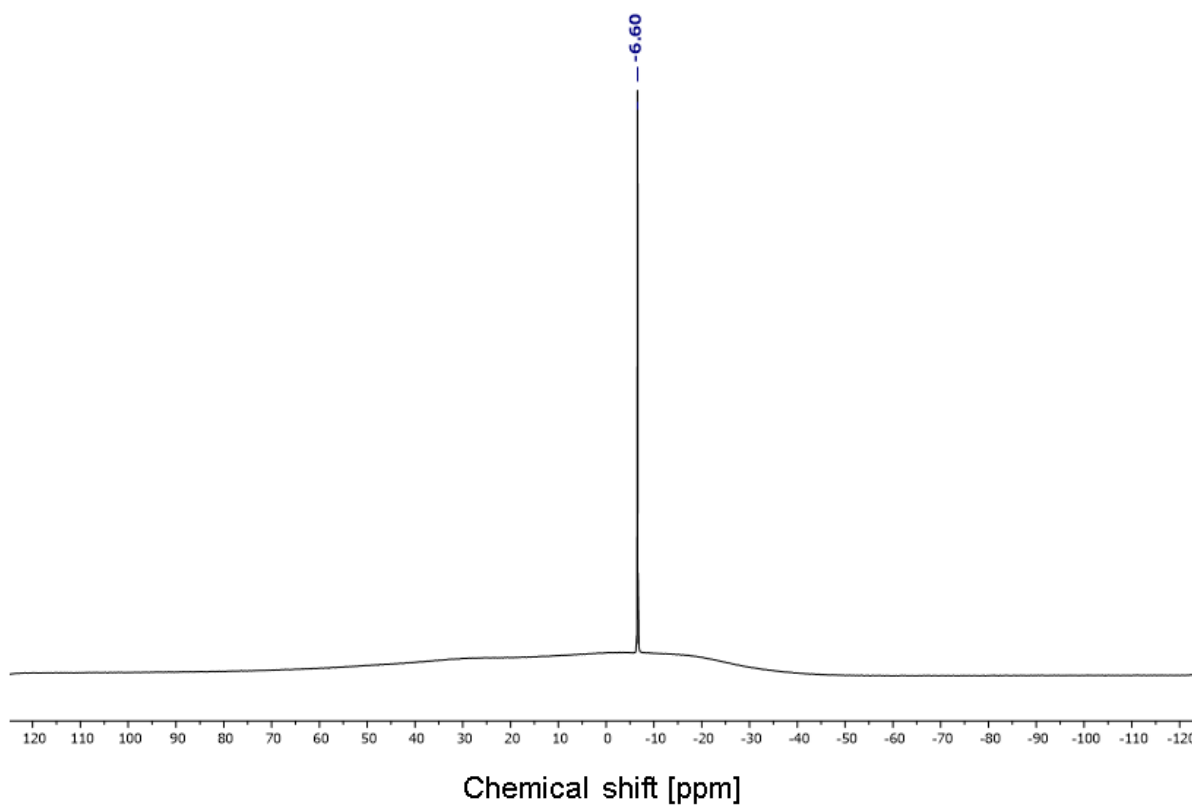

**Figure S26:**  $^{11}\text{B}\{^1\text{H}\}$  NMR spectrum of  $[(\text{TEEDA})\text{ZnH}]_2[\text{B}(3,5\text{-(CF}_3)_2\text{-C}_6\text{H}_3)_4]_2$  (**2b**) in  $\text{CD}_2\text{Cl}_2$ .

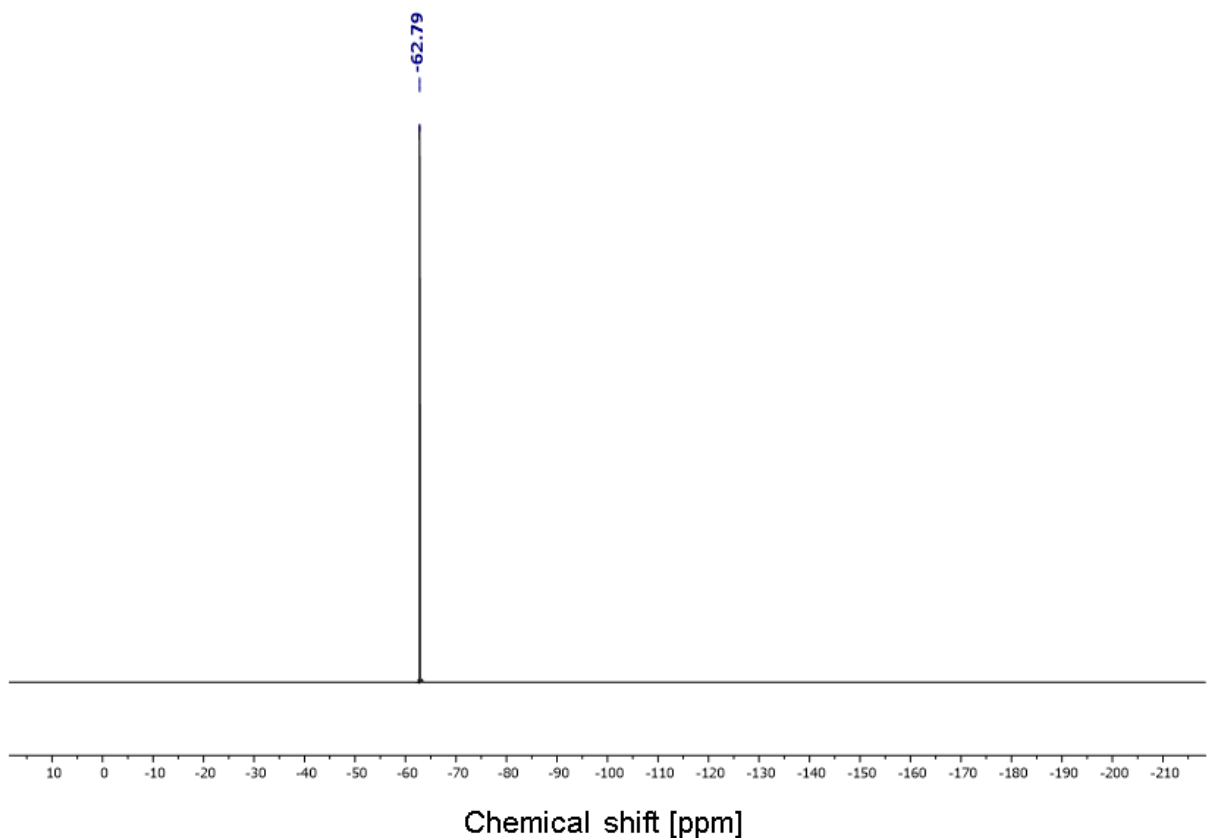

Figure S27:  $^{19}\text{F}\{^1\text{H}\}$  NMR spectrum of  $[(\text{TEEDA})\text{ZnH}]_2[\text{B}(3,5\text{-(CF}_3)_2\text{-C}_6\text{H}_3)_2]$  (**2b**) in  $\text{CD}_2\text{Cl}_2$ .

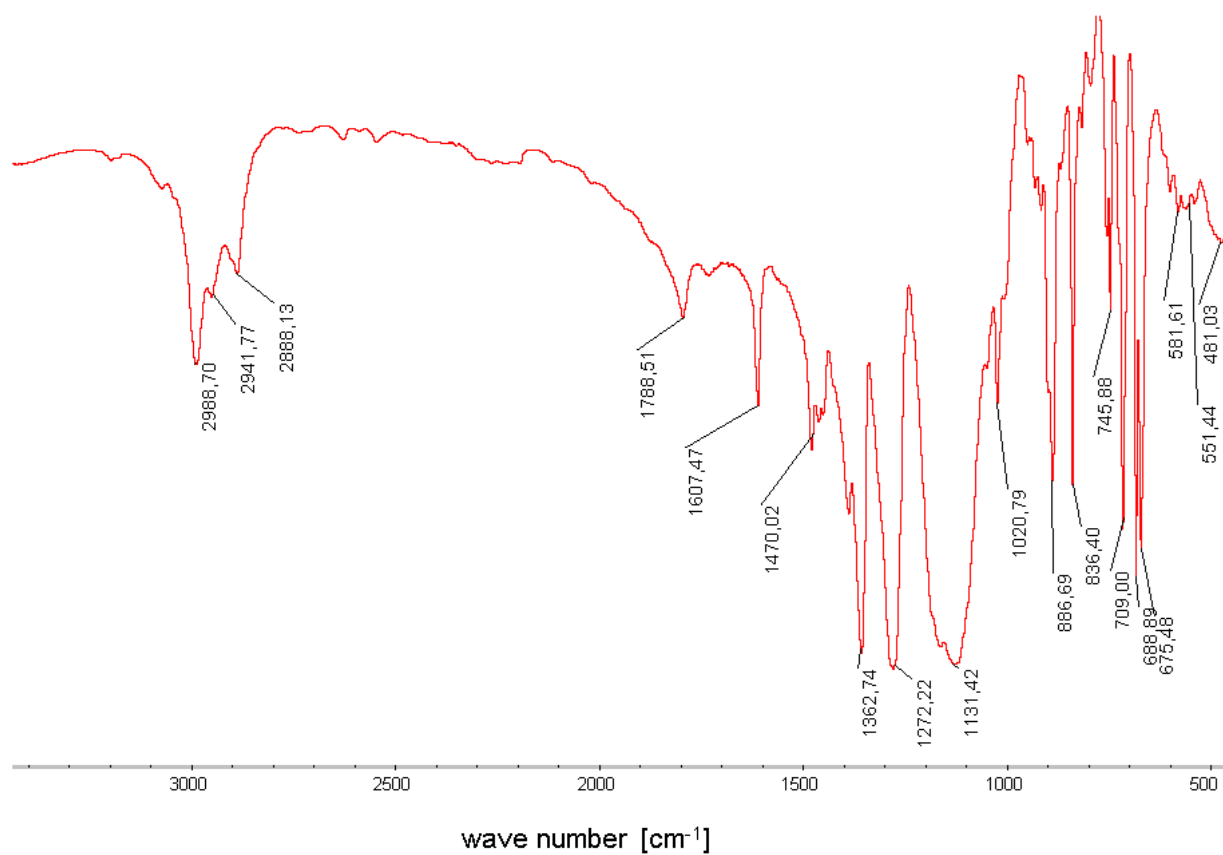

Figure S28: IR spectrum (KBr pellet) of  $[(\text{TEEDA})\text{ZnH}]_2[\text{B}(3,5\text{-(CF}_3)_2\text{-C}_6\text{H}_3)_2]$  (**2b**).

### Synthesis of [(TMEDA)<sub>2</sub>Zn<sub>2</sub>H<sub>3</sub>][B(3,5-(CF<sub>3</sub>)<sub>2</sub>-C<sub>6</sub>H<sub>3</sub>)<sub>4</sub>] (**3a**).

**Method A:** To a suspension of [ZnH<sub>2</sub>]<sub>n</sub> (70 mg, 1.03 mmol) in THF (5 mL) was added dropwise a solution of [(TMEDA)H][B(3,5-(CF<sub>3</sub>)<sub>2</sub>-C<sub>6</sub>H<sub>3</sub>)] (500 mg, 0.51 mmol) and TMEDA (59 mg, 0.51 mmol) in THF (5 mL). The reaction mixture was stirred at room temperature until gas evolution ceased (approximately 15 min). The reaction mixture was filtered and the filtrate concentrated *in vacuo*. Addition of *n*-pentane resulted in the precipitation of a colorless solid which could be isolated by decantation and subsequent drying under reduced pressures. Recrystallization from CD<sub>2</sub>Cl<sub>2</sub>/*n*-pentane at -30 °C gave [(TMEDA)<sub>2</sub>Zn(H)<sub>3</sub>][B(3,5-(CF<sub>3</sub>)<sub>2</sub>-C<sub>6</sub>H<sub>3</sub>)<sub>4</sub>] as a colorless solid (554 mg, 0.45 mmol). Yield: 88%.

**Method B:** To a suspension of [ZnH<sub>2</sub>]<sub>n</sub> (6 mg, 89 μmol) and TMEDA (10 mg, 89 μmol) in THF (5 mL) was added a THF solution of [(TMEDA)ZnH(thf)][B(3,5-(CF<sub>3</sub>)<sub>2</sub>-C<sub>6</sub>H<sub>3</sub>)] (**1a**) (100 mg, 89 μmol). The solvent was removed *in vacuo* and the residue was recrystallized from CD<sub>2</sub>Cl<sub>2</sub>/*n*-pentane at -30 °C. The supernatant was decanted off and the crystalline solid was dried under reduced pressure a colorless solid (105 mg, 85 μmol). Yield: 96%.

<sup>1</sup>H NMR (400 MHz, [D<sub>8</sub>]THF): δ = 2.58 (s, N-CH<sub>3</sub>, 24H), 2.83 (s, N-CH<sub>2</sub>, 8H), 3.68 (s, Zn-H, 3H), 7.59 (s, *para*-C<sub>6</sub>H<sub>3</sub>, 4H), 7.80 (s, *ortho*-C<sub>6</sub>H<sub>3</sub>, 8H) ppm.

<sup>13</sup>C{<sup>1</sup>H} NMR (101 MHz, [D<sub>8</sub>]THF): δ = 48.10 (N-CH<sub>3</sub>), 58.01 (N-CH<sub>2</sub>), 118.25 (*para*-C<sub>6</sub>H<sub>3</sub>), 125.58 (q, <sup>1</sup>J<sub>C-F</sub> = 272.2 Hz, CF<sub>3</sub>), 130.13 (qq, <sup>2</sup>J<sub>C-F</sub> = 31.2 Hz, <sup>3</sup>J<sub>B-C</sub> = 3.4 Hz, *meta*-C<sub>6</sub>H<sub>3</sub>), 135.66 (*ortho*-C<sub>6</sub>H<sub>3</sub>), 163.37 (q, <sup>1</sup>J<sub>B-C</sub> = 50.1 Hz, *ipso*-C<sub>6</sub>H<sub>3</sub>) ppm

<sup>11</sup>B{<sup>1</sup>H} NMR (128 MHz, [D<sub>8</sub>]THF): δ = -6.52 ppm.

<sup>19</sup>F{<sup>1</sup>H} NMR (377 MHz, [D<sub>8</sub>]THF): δ = -63.42 ppm.

<sup>1</sup>H NMR (400 MHz, CD<sub>2</sub>Cl<sub>2</sub>): δ = 2.56 (s, N-CH<sub>3</sub>, 24H), 2.74 (s, N-CH<sub>2</sub>, 8H), 3.58 (s, Zn-H, 3H), 7.58 (s, *para*-C<sub>6</sub>H<sub>3</sub>, 4H), 7.73 (s, *ortho*-C<sub>6</sub>H<sub>3</sub>, 8H) ppm.

<sup>13</sup>C{<sup>1</sup>H} NMR (101 MHz, CD<sub>2</sub>Cl<sub>2</sub>): δ = 48.59 (N-CH<sub>3</sub>), 57.82 (N-CH<sub>2</sub>), 117.97 (*para*-C<sub>6</sub>H<sub>3</sub>), 125.24 (q, <sup>1</sup>J<sub>C-F</sub> = 272.3 Hz, CF<sub>3</sub>), 129.48 (qq, <sup>2</sup>J<sub>C-F</sub> = 31.5 Hz, <sup>3</sup>J<sub>B-C</sub> = 2.8 Hz, *meta*-C<sub>6</sub>H<sub>3</sub>), 135.44 (*ortho*-C<sub>6</sub>H<sub>3</sub>), 162.40 (q, <sup>1</sup>J<sub>B-C</sub> = 49.9 Hz, *ipso*-C<sub>6</sub>H<sub>3</sub>) ppm.

<sup>13</sup>B{<sup>1</sup>H} NMR (128 MHz, CD<sub>2</sub>Cl<sub>2</sub>): δ = -6.60 ppm.

<sup>19</sup>F{<sup>1</sup>H} NMR (377 MHz, CD<sub>2</sub>Cl<sub>2</sub>): δ = -62.80 ppm.

IR (KBr): ν = 1758 (m, ZnH), 1606 cm<sup>-1</sup> (m, ZnH).

Anal. Calcd. for C<sub>44</sub>H<sub>47</sub>BF<sub>24</sub>N<sub>4</sub>Zn<sub>2</sub> (1229.42 g · mol<sup>-1</sup>): C, 42.99; H, 3.85; N, 4.56. Found: C, 43.61; H, 4.46; N, 4.61%.

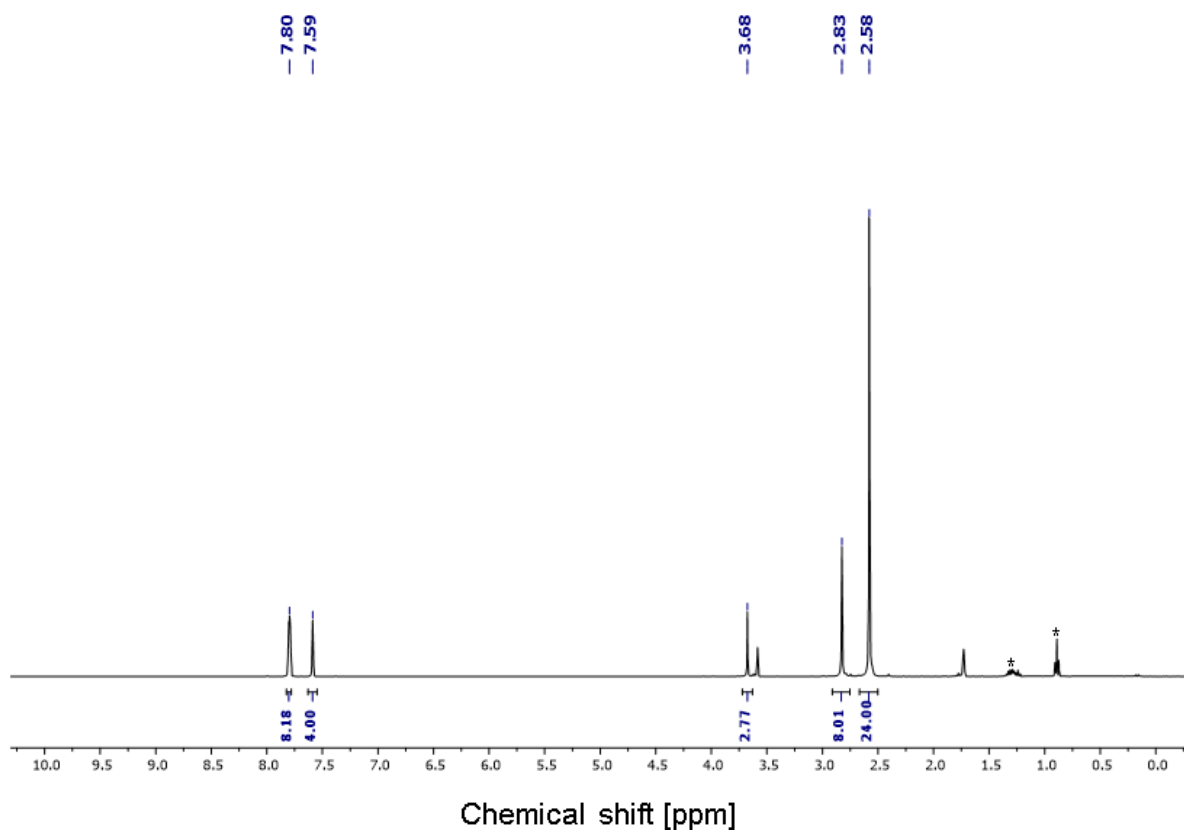

**Figure S29:**  $^1\text{H}$  NMR spectrum of  $[(\text{TMEDA})_2\text{Zn}_2\text{H}_3][\text{B}(3,5\text{-(CF}_3)_2\text{-C}_6\text{H}_3)_4]$  (**3a**) in  $[\text{D}_8]\text{THF}$  (\* denotes *n*-pentane).

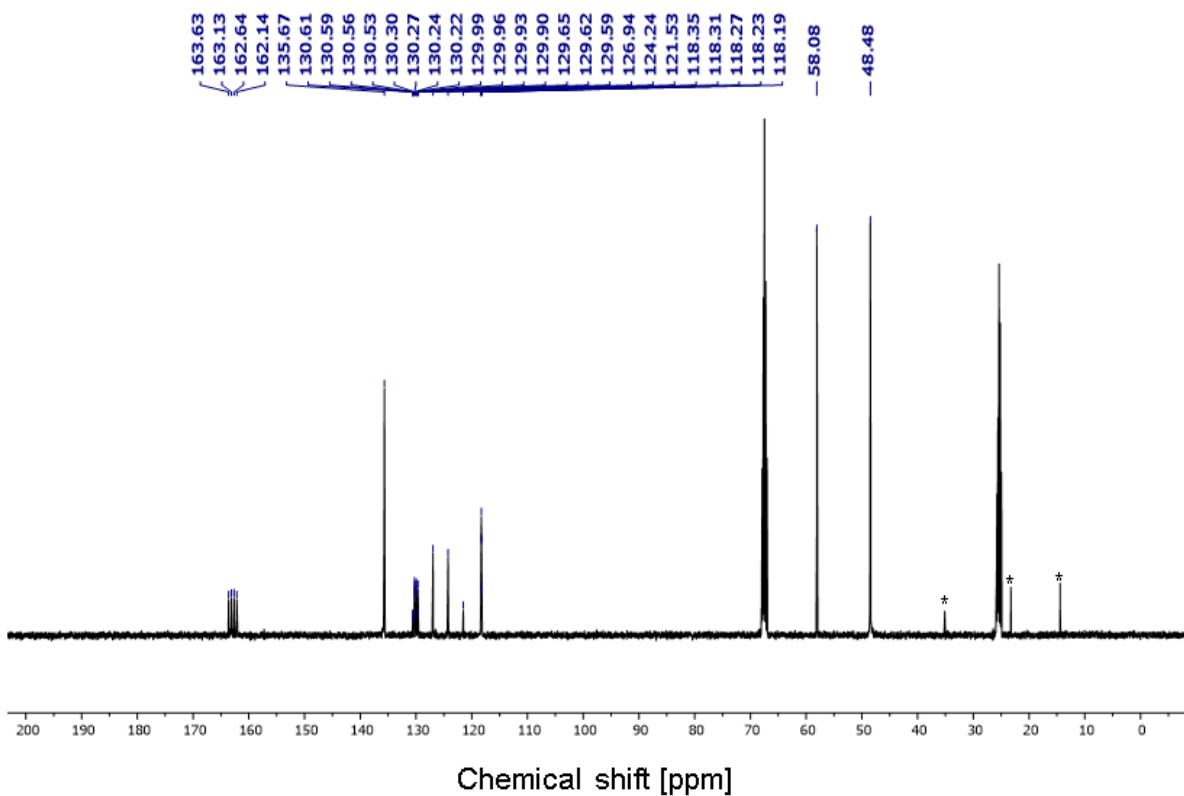

**Figure S30:**  $^{13}\text{C}\{^1\text{H}\}$  NMR spectrum of  $[(\text{TMEDA})_2\text{Zn}_2\text{H}_3][\text{B}(3,5\text{-(CF}_3)_2\text{-C}_6\text{H}_3)_4]$  (**3a**) in  $[\text{D}_8]\text{THF}$  (\* denotes *n*-pentane).

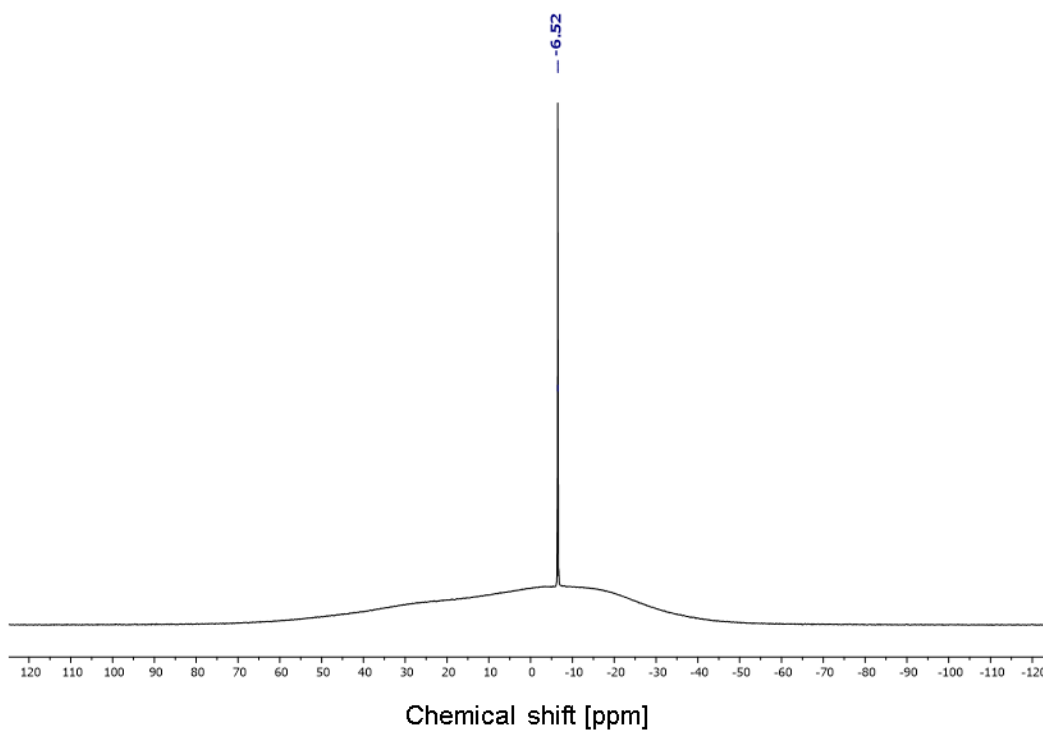

**Figure S31:**  $^{11}\text{B}\{^1\text{H}\}$  NMR spectrum of  $[(\text{TMEDA})_2\text{Zn}_2\text{H}_3][\text{B}(3,5\text{-(CF}_3)_2\text{-C}_6\text{H}_3)_4]$  (**3a**) in  $[\text{D}_8]\text{THF}$ .

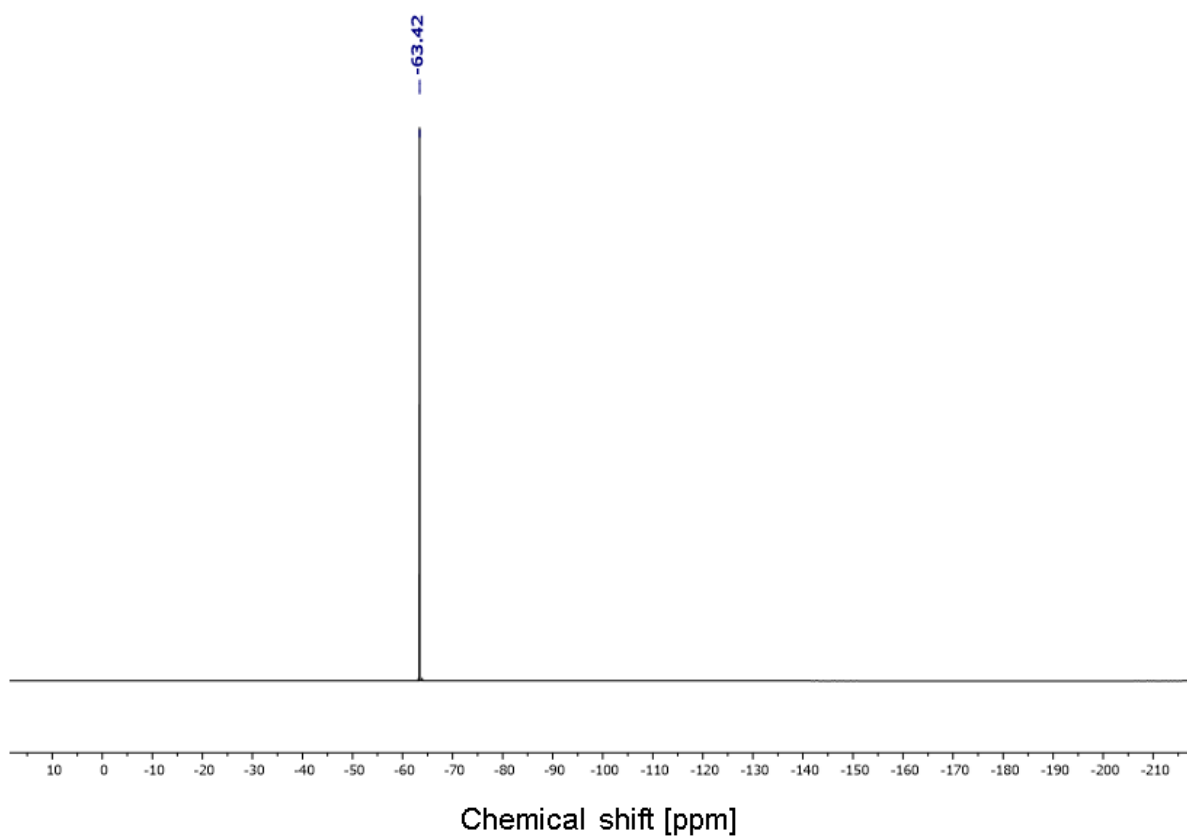

**Figure S32:**  $^{19}\text{F}\{^1\text{H}\}$  NMR spectrum of  $[(\text{TMEDA})_2\text{Zn}_2\text{H}_3][\text{B}(3,5\text{-(CF}_3)_2\text{-C}_6\text{H}_3)_4]$  (**3a**) in  $[\text{D}_8]\text{THF}$ .

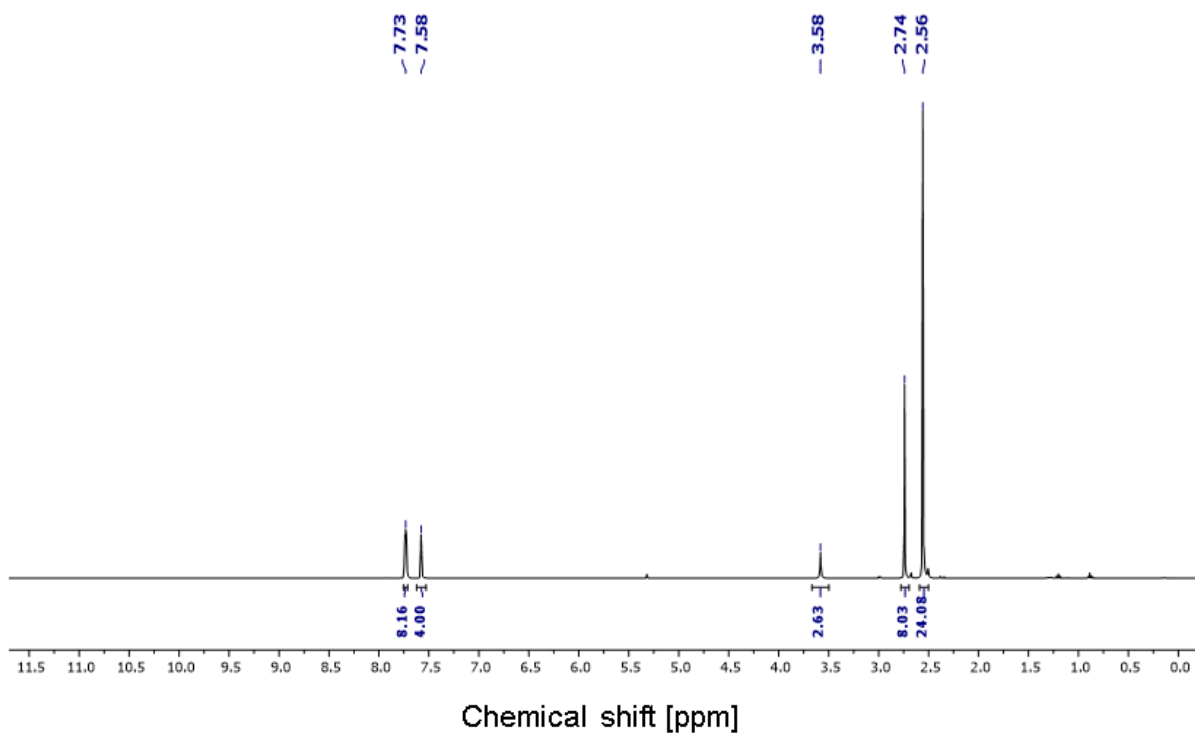

Figure S33:  $^1\text{H}$  NMR spectrum of  $[(\text{TMEDA})_2\text{Zn}_2\text{H}_3][\text{B}(3,5\text{-(CF}_3)_2\text{-C}_6\text{H}_3)_4]$  (**3a**) in  $\text{CD}_2\text{Cl}_2$ .

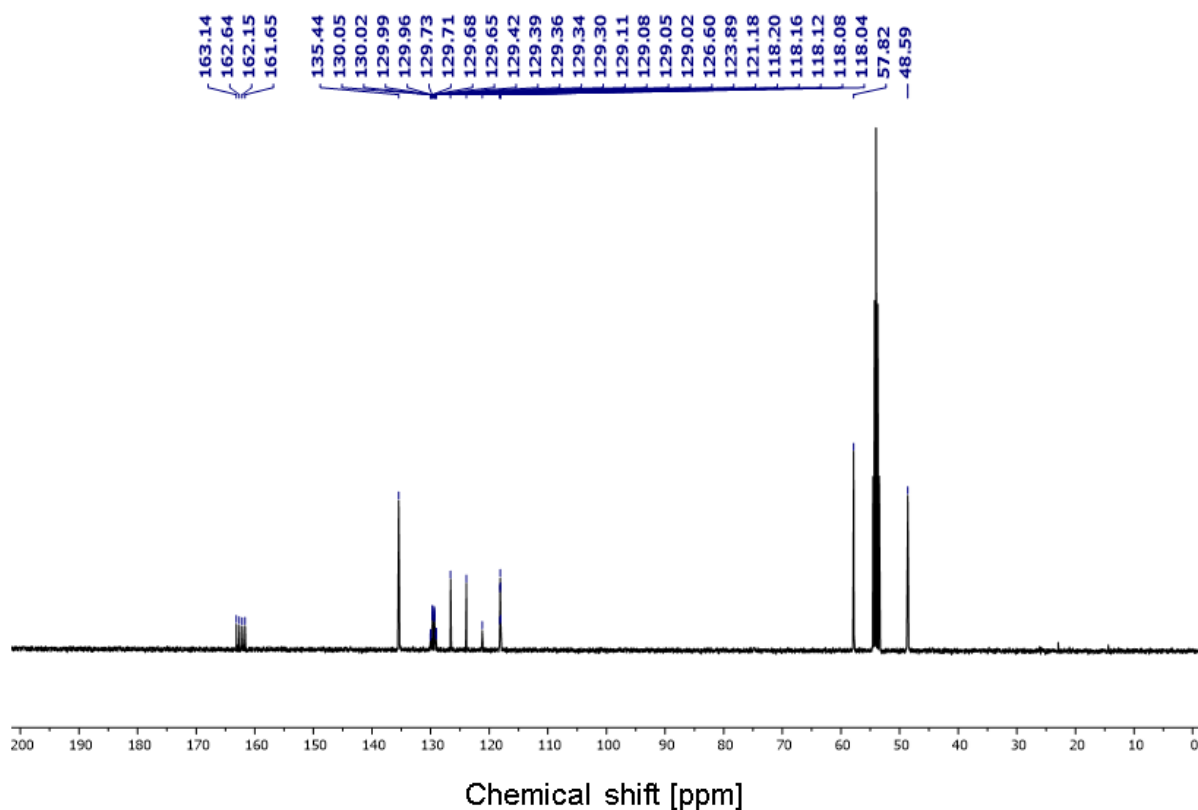

Figure S34:  $^{13}\text{C}\{^1\text{H}\}$  NMR spectrum of  $[(\text{TMEDA})_2\text{Zn}_2\text{H}_3][\text{B}(3,5\text{-(CF}_3)_2\text{-C}_6\text{H}_3)_4]$  (**3a**) in  $\text{CD}_2\text{Cl}_2$ .



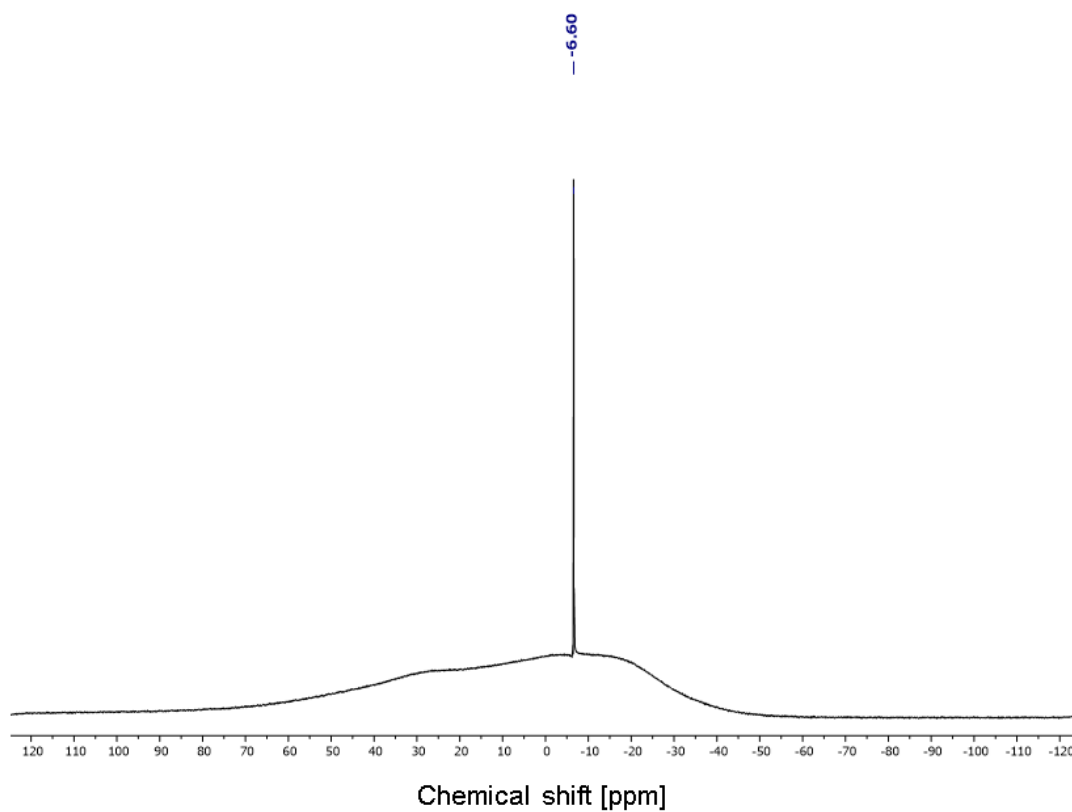

**Figure S35:**  $^{11}\text{B}\{^1\text{H}\}$  NMR spectrum of  $[(\text{TMEDA})_2\text{Zn}_2\text{H}_3][\text{B}(3,5\text{-(CF}_3)_2\text{-C}_6\text{H}_3)_4]$  (**3a**)  $\text{CD}_2\text{Cl}_2$ .

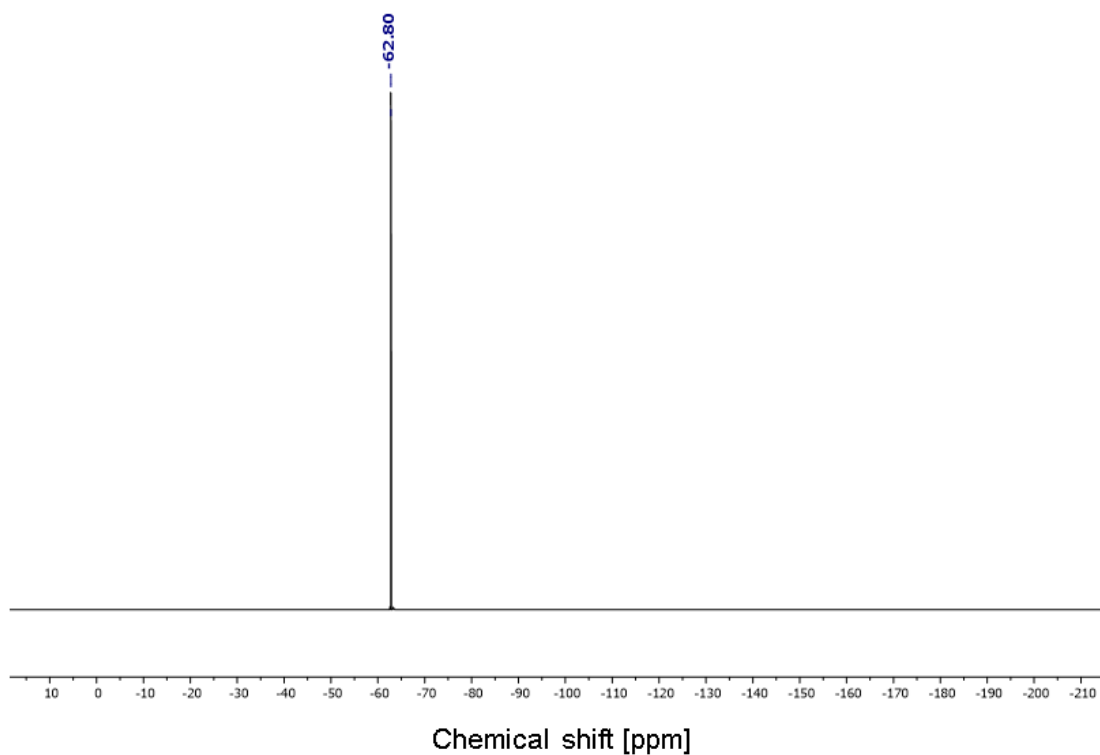

**Figure S36:**  $^{19}\text{F}\{^1\text{H}\}$  NMR spectrum of  $[(\text{TMEDA})_2\text{Zn}_2\text{H}_3][\text{B}(3,5\text{-(CF}_3)_2\text{-C}_6\text{H}_3)_4]$  (**3a**) in  $\text{CD}_2\text{Cl}_2$ .

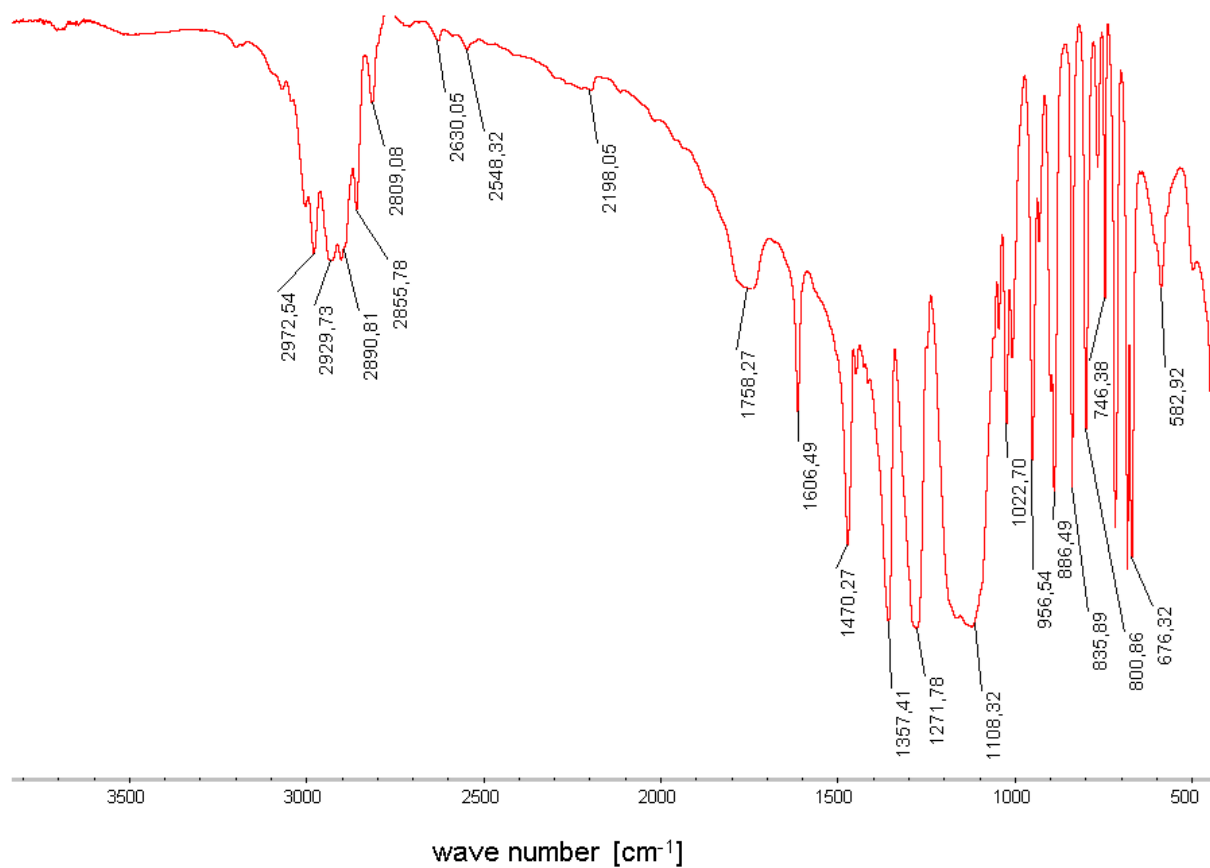

**Figure S37:** IR spectrum (KBr pellet) of  $[(\text{TMEDA})_2\text{Zn}_2\text{H}_3][\text{B}(3,5\text{-(CF}_3)_2\text{-C}_6\text{H}_3)_4]$  (**3a**).

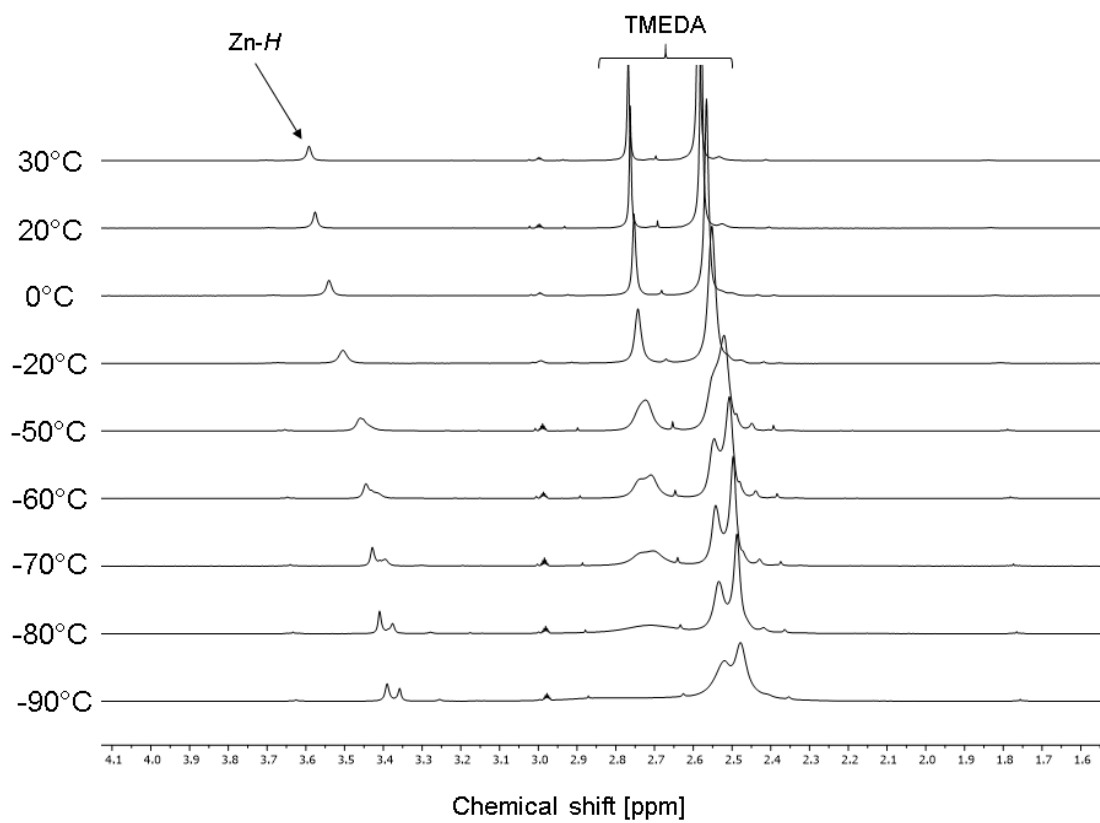

**Figure S38:** Variable-temperature  $^1\text{H}$  NMR spectrum of  $[(\text{TMEDA})_2\text{Zn}_2\text{H}_3][\text{B}(3,5\text{-(CF}_3)_2\text{-C}_6\text{H}_3)_4]$  (**3a**) in  $\text{CD}_2\text{Cl}_2$ .

### Synthesis of [(TEEDA)<sub>2</sub>Zn<sub>2</sub>H<sub>3</sub>][B(3,5-(CF<sub>3</sub>)<sub>2</sub>-C<sub>6</sub>H<sub>3</sub>)<sub>4</sub>] (3b).

**Method A:** To a suspension of [ZnH<sub>2</sub>]<sub>n</sub> (26 mg, 385 μmol) in THF (5 mL) was added dropwise a solution of [(TEEDA)H][B(3,5-(CF<sub>3</sub>)<sub>2</sub>-C<sub>6</sub>H<sub>3</sub>)] (200 mg, 192 μmol) and TEEDA (33.2 mg, 192 μmol) in THF (5 mL). The reaction mixture was stirred at room temperature until gas evolution had ceased (approximately 15 min), filtered and concentrated *in vacuo*. Addition of *n*-pentane resulted in the precipitation of a colorless solid which was isolated by decantation and subsequent drying under reduced pressures. Recrystallization from toluene/*n*-pentane at -30 °C gave [(TEEDA)<sub>2</sub>ZnH<sub>3</sub>][B(3,5-(CF<sub>3</sub>)<sub>2</sub>-C<sub>6</sub>H<sub>3</sub>)<sub>4</sub>] as a colorless solid (284 mg, 211 μmol). Yield: 74%.

**Method B:** To a suspension of [ZnH<sub>2</sub>]<sub>n</sub> (6 mg, 91 μmol) and TEEDA (16 mg, 91 μmol) in THF (5 mL) was added a solution of [(TEEDA)ZnH]<sub>2</sub>[B(3,5-(CF<sub>3</sub>)<sub>2</sub>-C<sub>6</sub>H<sub>3</sub>)<sub>2</sub>] (100 mg, 45 μmol) in THF (mL). After stirring the reaction mixture for 15 min at room temperature, the solvent was removed *in vacuo*. The residue was recrystallized from CD<sub>2</sub>Cl<sub>2</sub>/*n*-pentane at -30 °C. The supernatant was decanted off and the crystalline solid was dried under reduced pressure to give colorless crystals (121 mg, 90 μmol). Yield: 98%.

<sup>1</sup>H NMR (400 MHz, [D<sub>8</sub>]THF): δ = 1.14 (t, <sup>3</sup>J<sub>H-H</sub> = 7.1 Hz, N-CH<sub>2</sub>-CH<sub>3</sub>, 24H), 2.83 (m, N-CH<sub>2</sub>CH<sub>3</sub>, 8H), 2.90 (s, N-CH<sub>2</sub>, 8H), 3.06 (m, N-CH<sub>2</sub>CH<sub>3</sub>, 8H), 3.65 (s, Zn-H, 3H), 7.60 (s, *para*-C<sub>6</sub>H<sub>3</sub>, 4H), 7.81 (s, *ortho*-C<sub>6</sub>H<sub>3</sub>, 8H) ppm.

<sup>13</sup>C{<sup>1</sup>H} NMR (101 MHz, [D<sub>8</sub>]THF): δ = 9.19 (N-CH<sub>2</sub>CH<sub>3</sub>), 47.78 (N-CH<sub>2</sub>CH<sub>3</sub>), 51.72 (N-CH<sub>2</sub>CH<sub>2</sub>), 118.28 (*para*-C<sub>6</sub>H<sub>3</sub>), 125.62 (q, <sup>1</sup>J<sub>C-F</sub> = 272.2 Hz, CF<sub>3</sub>), 130.27 (qq, <sup>2</sup>J<sub>C-F</sub> = 31.5 Hz, <sup>3</sup>J<sub>B-C</sub> = 2.8 Hz, *meta*-C<sub>6</sub>H<sub>3</sub>), 135.70 (*ortho*-C<sub>6</sub>H<sub>3</sub>), 162.90 (q, <sup>1</sup>J<sub>B-C</sub> = 49.8 Hz, *ipso*-C<sub>6</sub>H<sub>3</sub>) ppm.

<sup>11</sup>B{<sup>1</sup>H} NMR (128 MHz, [D<sub>8</sub>]THF): δ = -6.50 ppm.

<sup>19</sup>F{<sup>1</sup>H} NMR (377 MHz, [D<sub>8</sub>]THF): δ = -63.44 ppm.

IR (KBr): ν = 1758 (m, ZnH), 1610 cm<sup>-1</sup> (m, ZnH).

Anal. Calcd. for C<sub>82</sub>H<sub>76</sub>B<sub>2</sub>F<sub>48</sub>N<sub>6</sub>Zn<sub>3</sub> (2209.86 g · mol<sup>-1</sup>): C, 46.55; H, 4.73; N, 4.18. Found: C, 46.02; H, 4.52; N, 4.22%.

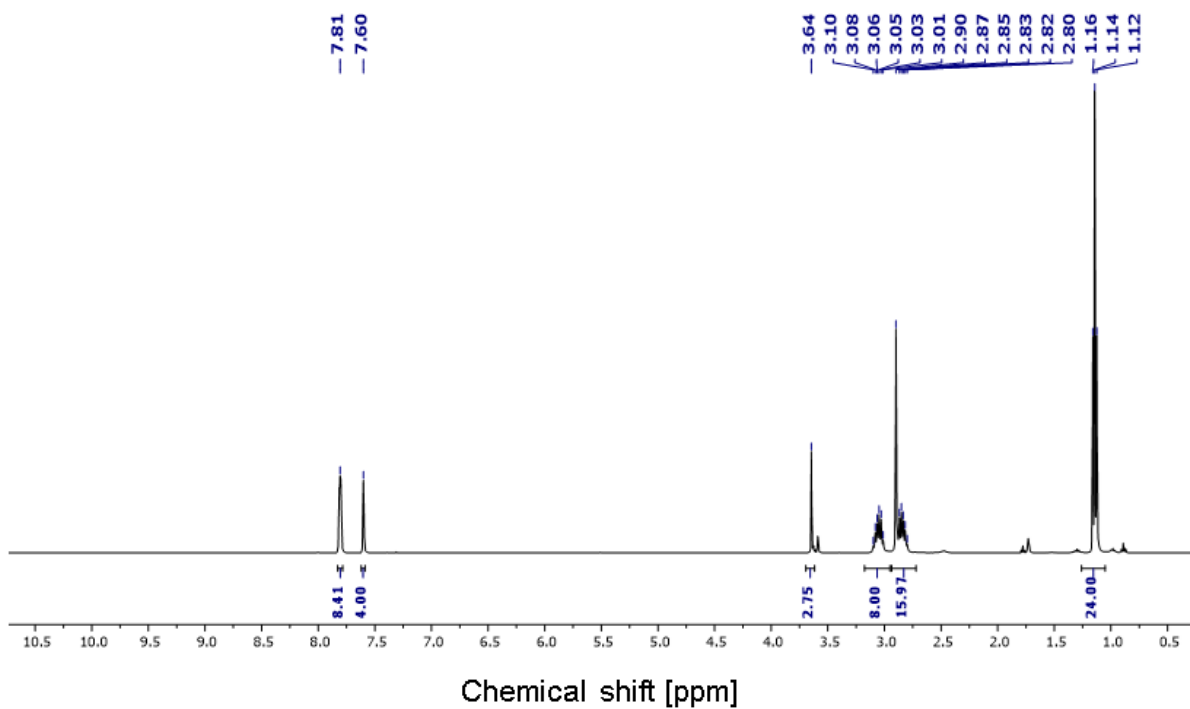

**Figure S39:**  $^1\text{H}$  NMR spectrum of  $[(\text{TEEDA})_2\text{Zn}_2\text{H}_3][\text{B}(3,5\text{-(CF}_3)_2\text{-C}_6\text{H}_3)]$  (**3b**) in  $[\text{D}_8]\text{THF}$ .

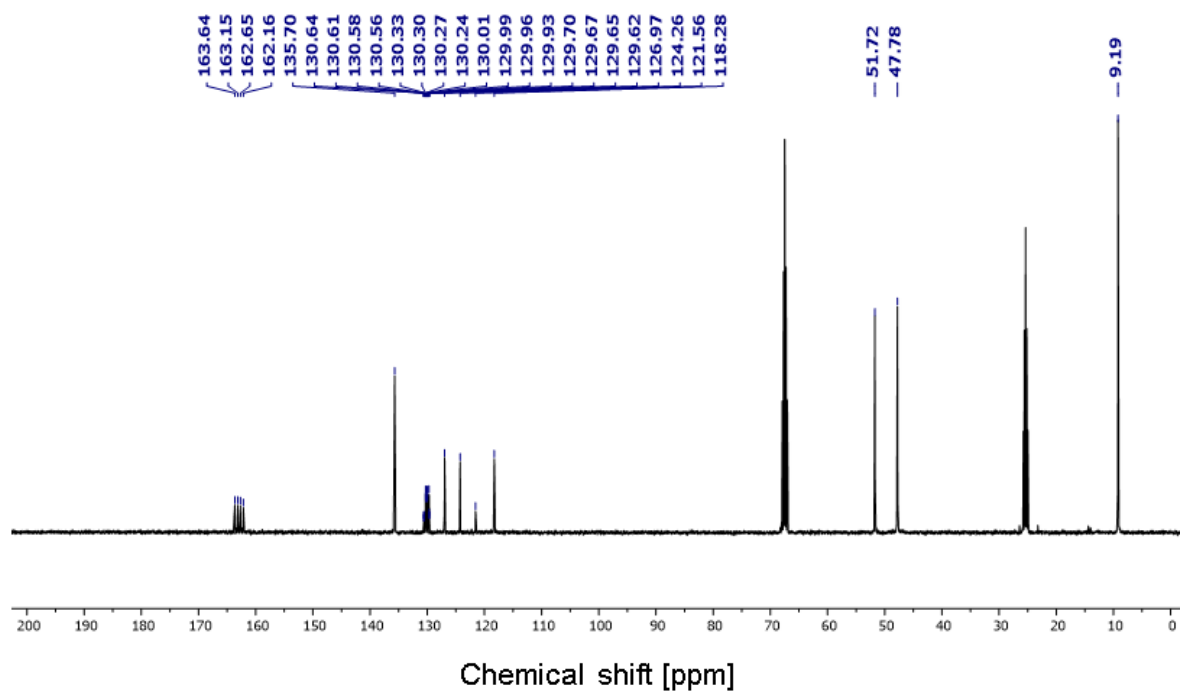

**Figure S40:**  $^{13}\text{C}\{^1\text{H}\}$  NMR spectrum of  $[(\text{TEEDA})_2\text{Zn}_2\text{H}_3][\text{B}(3,5\text{-(CF}_3)_2\text{-C}_6\text{H}_3)]$  (**3b**) in  $[\text{D}_8]\text{THF}$ .

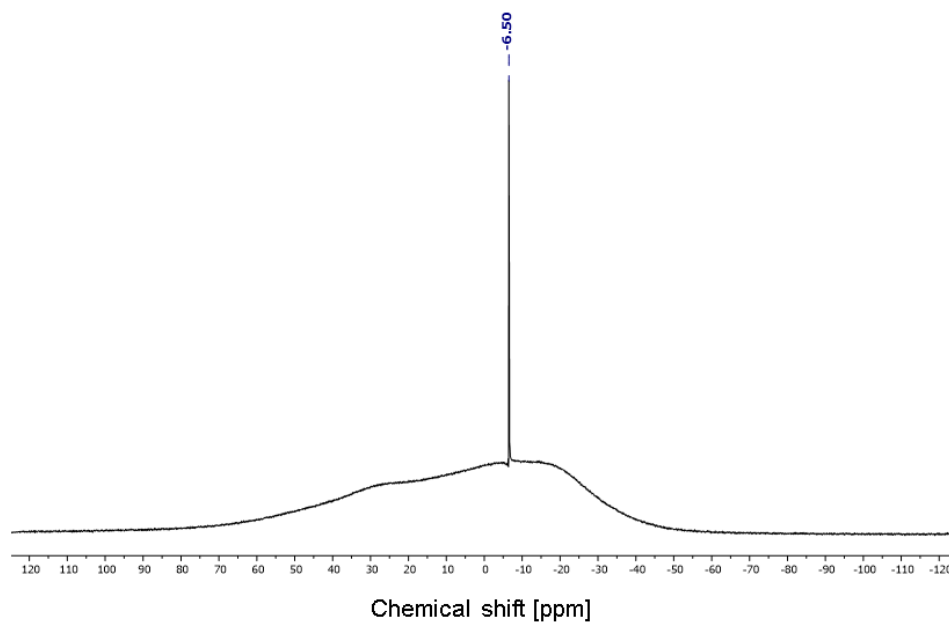

**Figure S41:**  $^{11}\text{B}\{^1\text{H}\}$  NMR spectrum of  $[(\text{TEEDA})_2\text{Zn}_2\text{H}_3][\text{B}(3,5\text{-(CF}_3)_2\text{-C}_6\text{H}_3)]$  in  $[\text{D}_8]\text{THF}$ .

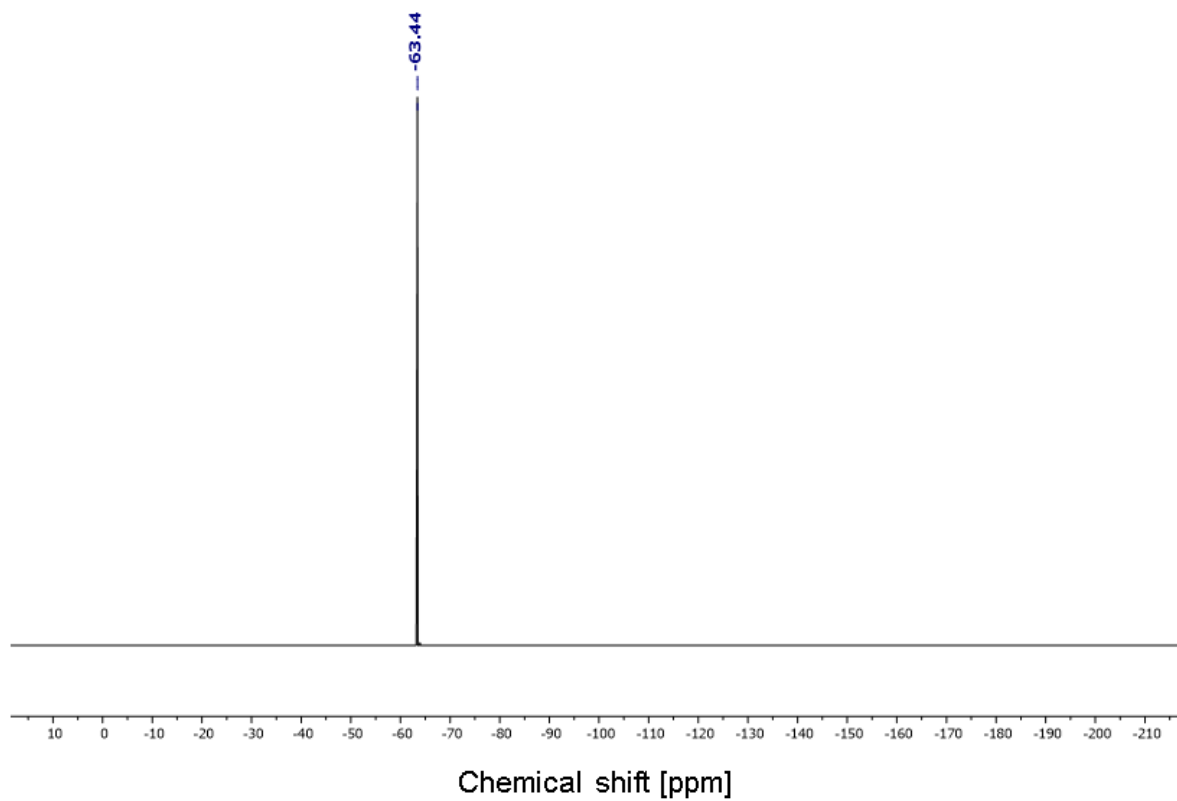

**Figure S42:**  $^{19}\text{F}\{^1\text{H}\}$  NMR spectrum of  $[(\text{TEEDA})_2\text{Zn}_2\text{H}_3][\text{B}(3,5\text{-(CF}_3)_2\text{-C}_6\text{H}_3)]$  (**3b**) in  $[\text{D}_8]\text{THF}$ .

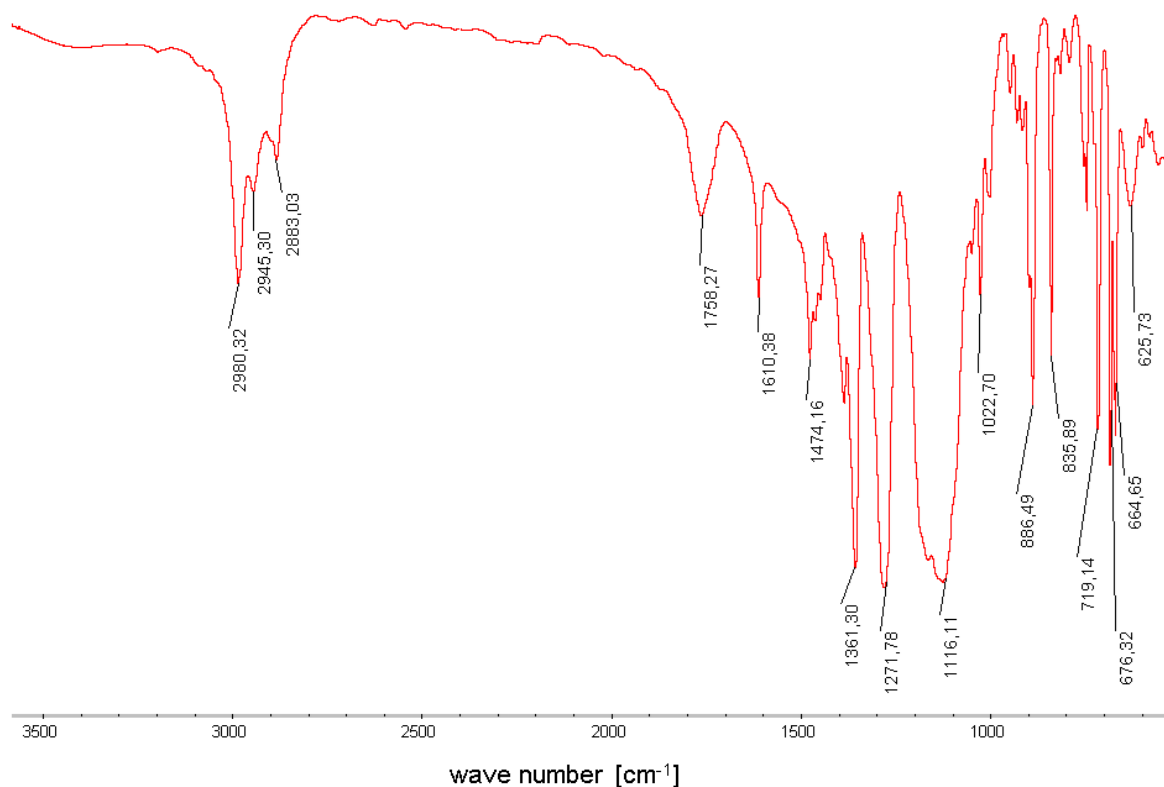

**Figure S43:** IR spectrum (KBr pellet) of [(TEEDA)<sub>2</sub>Zn<sub>2</sub>H<sub>3</sub>][B(3,5-(CF<sub>3</sub>)<sub>2</sub>-C<sub>6</sub>H<sub>3</sub>)] (**3b**).

### Synthesis of [(TMEDA)<sub>3</sub>Zn<sub>3</sub>H<sub>4</sub>][B(3,5-(CF<sub>3</sub>)<sub>2</sub>-C<sub>6</sub>H<sub>3</sub>)<sub>4</sub>]<sub>2</sub> (**4a**).

**Method A:** To a suspension of [ZnH<sub>2</sub>]<sub>n</sub> (21 mg, 306 μmol) in THF (5 mL) was added a solution of [(TMEDA)H][B(3,5-(CF<sub>3</sub>)<sub>2</sub>-C<sub>6</sub>H<sub>3</sub>)<sub>4</sub>] (200 mg, 204 μmol) and TMEDA (12 mg, 102 μmol) in THF (5 mL). After gas evolution had ceased (ca. 15 min), the reaction mixture was filtered and the volume of the filtrate reduced in *vacuo*. Addition of *n*-pentane resulted in the precipitation of a colorless solid which was isolated by decantation and subsequent drying under reduced pressure to give colorless platelets (201 mg, 91 μmol). Yield: 90%.

**Method B:** To a suspension of [ZnH<sub>2</sub>]<sub>n</sub> (3 mg, 44 μmol) and TMEDA (5 mg, 44 μmol) in THF (5 mL) was added a solution containing [(TMEDA)ZnH(thf)][B(3,5-(CF<sub>3</sub>)<sub>2</sub>-C<sub>6</sub>H<sub>3</sub>)<sub>4</sub>] (100 mg, 89 μmol) in THF (5 mL). The reaction mixture was stirred at room temperature for 30 min. After filtration the solvent was removed in *vacuo* to give [(TMEDA)<sub>3</sub>Zn<sub>3</sub>H<sub>4</sub>][B(3,5-(CF<sub>3</sub>)<sub>2</sub>-C<sub>6</sub>H<sub>3</sub>)<sub>4</sub>]<sub>2</sub> as colorless platelets (92 mg, 42 μmol). Yield: 94%.

<sup>1</sup>H NMR (400 MHz, [D<sub>8</sub>]THF): δ = 2.50 (s, N-CH<sub>3</sub>, 36H), 2.73 (s, N-CH<sub>2</sub>, 12H), 3.62 (s, Zn-H, 4H), 7.60 (s, *para*-C<sub>6</sub>H<sub>3</sub>, 8H), 7.80 (s, *ortho*-C<sub>6</sub>H<sub>3</sub>, 16H) ppm.

<sup>13</sup>C{<sup>1</sup>H} NMR (101 MHz, [D<sub>8</sub>]THF): δ = 47.52 (N-CH<sub>3</sub>), 58.26 (N-CH<sub>2</sub>), 118.29 (*para*-C<sub>6</sub>H<sub>3</sub>), 125.61 (q, <sup>1</sup>J<sub>C-F</sub> = 272.2 Hz, CF<sub>3</sub>), 130.12 (qq, <sup>2</sup>J<sub>C-F</sub> = 31.5 Hz, <sup>3</sup>J<sub>B-C</sub> = 2.8 Hz, *meta*-C<sub>6</sub>H<sub>3</sub>), 135.68 (*ortho*-C<sub>6</sub>H<sub>3</sub>), 162.90 (q, <sup>1</sup>J<sub>B-C</sub> = 49.8 Hz, *ipso*-C<sub>6</sub>H<sub>3</sub>) ppm.

$^{11}\text{B}\{^1\text{H}\}$  NMR (128 MHz, [D8]THF):  $\delta = -6.50$  ppm.

$^{19}\text{F}\{^1\text{H}\}$  NMR (377 MHz, [D8]THF):  $\delta = -63.42$  ppm.

IR (KBr):  $\nu = 1778$  (m, ZnH),  $1606\text{ cm}^{-1}$  (m, ZnH).

Anal. Calcd. for  $\text{C}_{82}\text{H}_{76}\text{B}_2\text{F}_{48}\text{N}_6\text{Zn}_3$  ( $2209.86\text{ g} \cdot \text{mol}^{-1}$ ): C, 44.57; H, 3.47; N, 3.80. Found: C, 44.17; H, 4.36; N, 4.69%.

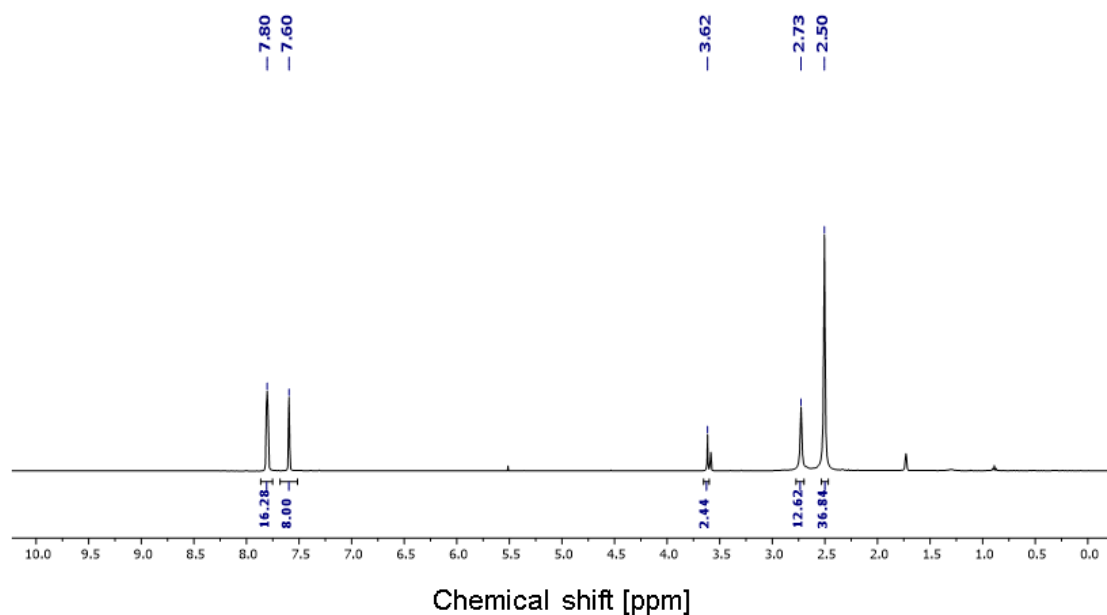

**Figure S44:**  $^1\text{H}$  NMR spectrum of  $[(\text{TMEDA})_3\text{Zn}_3\text{H}_4][\text{B}(3,5\text{-(CF}_3)_2\text{-C}_6\text{H}_3)_2]$  (**4a**) in [D8]THF.

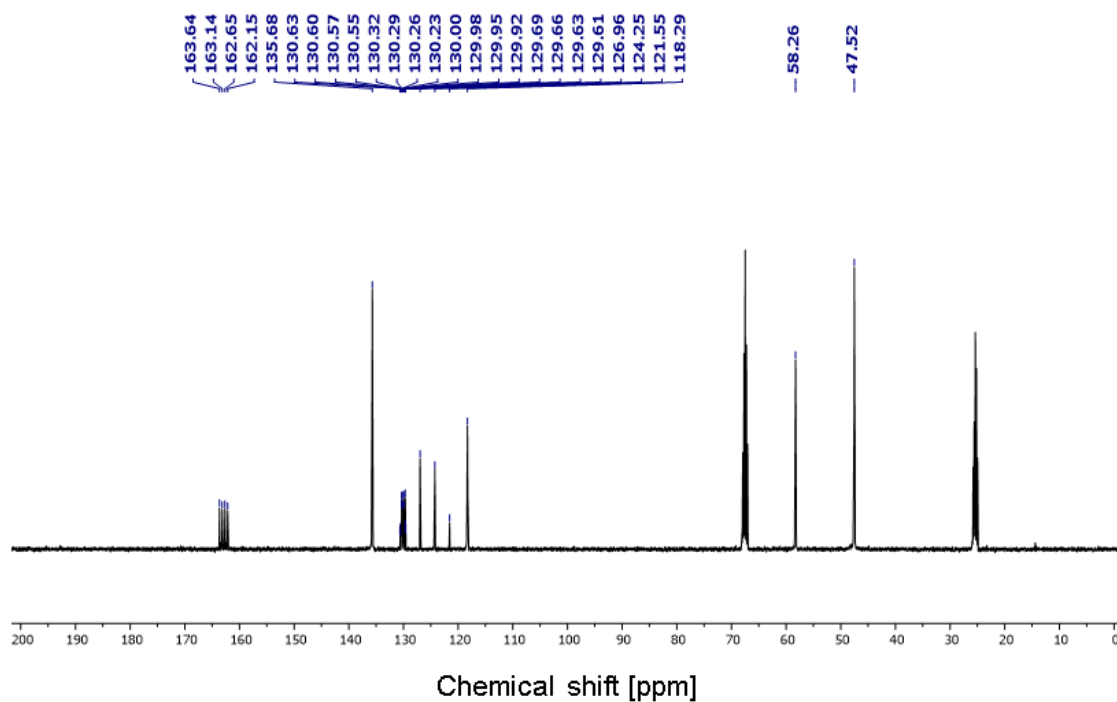

**Figure S45:**  $^{13}\text{C}\{^1\text{H}\}$  NMR spectrum of  $[(\text{TMEDA})_3\text{Zn}_3\text{H}_4][\text{B}(3,5\text{-(CF}_3)_2\text{-C}_6\text{H}_3)_2]$  (**4a**) in [D8]THF.

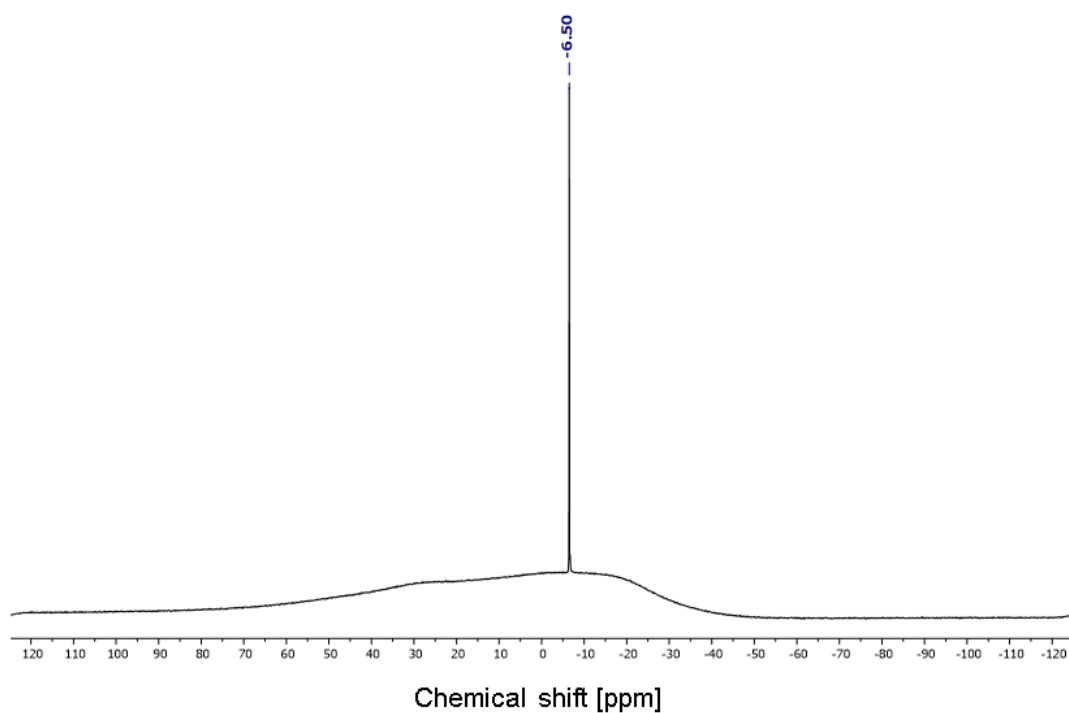

**Figure S46:**  $^{11}\text{B}\{^1\text{H}\}$  NMR spectrum of  $[(\text{TMEDA})_3\text{Zn}_3\text{H}_4][\text{B}(3,5\text{-(CF}_3)_2\text{-C}_6\text{H}_3)_2]$  (**4a**) in  $[\text{D}_8]\text{THF}$ .

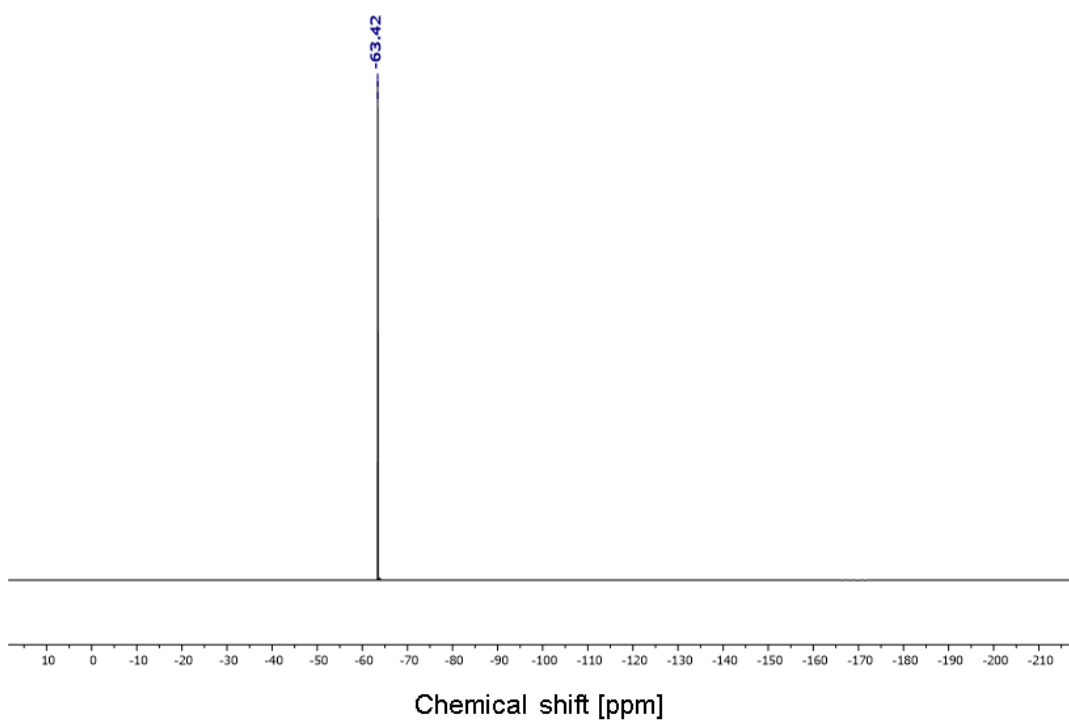

**Figure S47:**  $^{19}\text{F}\{^1\text{H}\}$  NMR spectrum of  $[(\text{TMEDA})_3\text{Zn}_3\text{H}_4][\text{B}(3,5\text{-(CF}_3)_2\text{-C}_6\text{H}_3)_2]$  (**4a**) in  $[\text{D}_8]\text{THF}$ .



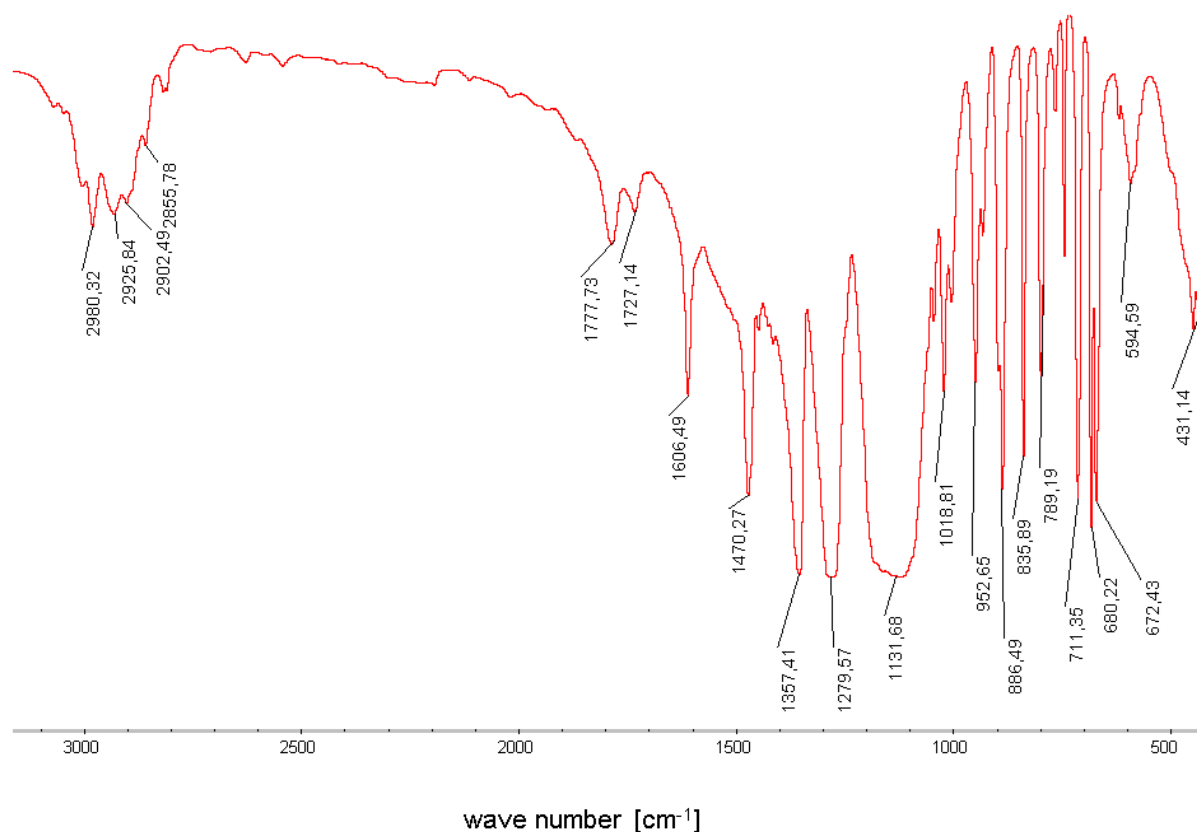

**Figure S48:** IR spectrum (KBr pellet) of  $[(\text{TMEDA})_3\text{Zn}_3\text{H}_4][\text{B}(3,5\text{-(CF}_3)_2\text{-C}_6\text{H}_3)_2]$  (**4a**).

### Synthesis of $[(\text{TEEDA})_3\text{Zn}_3\text{H}_4][\text{B}(3,5\text{-(CF}_3)_2\text{-C}_6\text{H}_3)_2]$ (**4b**).

**Method A:** To a suspension of  $[\text{ZnH}_2]_n$  (19 mg, 289  $\mu\text{mol}$ ) in THF (5 mL) was added dropwise a solution containing  $[(\text{TEEDA})\text{H}][\text{B}(3,5\text{-(CF}_3)_2\text{-C}_6\text{H}_3)]$  (200 mg, 192  $\mu\text{mol}$ ) and TEEDA (17 mg, 96  $\mu\text{mol}$ ) in THF (5 mL). After gas evolution had ceased (approximately 15 min) the reaction mixture was filtered and the volume of the filtrate reduced in *vacuo*. Addition of *n*-pentane results in the precipitation of a colorless solid which was isolated by decantation and subsequent drying under reduced pressure to give a colorless solid (217 mg, 89  $\mu\text{mol}$ ). Yield: 92%.

**Method B:** To a suspension of  $[\text{ZnH}_2]_n$  (3 mg, 45  $\mu\text{mol}$ ) and TEEDA (8 mg, 45  $\mu\text{mol}$ ) in THF (5 mL) was added a solution of  $[(\text{TEEDA})\text{ZnH}_2][\text{B}(3,5\text{-(CF}_3)_2\text{-C}_6\text{H}_3)_2]$  (100 mg, 45  $\mu\text{mol}$ ) in THF (5 mL). The reaction mixture was stirred at room temperature for 30 min. After filtration the solvent was removed in *vacuo* giving  $[(\text{TEEDA})_3\text{Zn}_3\text{H}_4][\text{B}(3,5\text{-(CF}_3)_2\text{-C}_6\text{H}_3)_2]$  as a colorless solid (103 mg, 42  $\mu\text{mol}$ ). Yield: 98%.

$^1\text{H NMR}$  (400 MHz,  $[\text{D}_8]\text{THF}$ ):  $\delta$  = 1.15 (t,  $^3J_{\text{H-H}} = 7.1$  Hz, N- $\text{CH}_2\text{-CH}_3$ , 36H), 2.88 (m, N- $\text{CH}_2\text{CH}_3$ , 12H), 2.92 (s, N- $\text{CH}_2$ , 12H), 3.03 (m, N- $\text{CH}_2\text{CH}_3$ , 12H), 3.66 (s, Zn-H, 4H), 7.58 (s, *para*- $\text{C}_6\text{H}_3$ , 8H), 7.79 (s, *ortho*- $\text{C}_6\text{H}_3$ , 16H) ppm.

$^{13}\text{C}\{^1\text{H}\}$  NMR (101 MHz, [D8]THF):  $\delta$  = 9.09 (N-CH<sub>2</sub>CH<sub>3</sub>), 47.46 (N-CH<sub>2</sub>CH<sub>3</sub>), 51.67 (N-CH<sub>2</sub>CH<sub>2</sub>), 118.26 (*para*-C<sub>6</sub>H<sub>3</sub>), 125.59 (q,  $^1J_{\text{C-F}}$  = 272.2 Hz, CF<sub>3</sub>), 130.09 (qq,  $^2J_{\text{C-F}}$  = 31.5 Hz,  $^3J_{\text{B-C}}$  = 2.8 Hz, *meta*-C<sub>6</sub>H<sub>3</sub>), 135.67 (*ortho*-C<sub>6</sub>H<sub>3</sub>), 162.88 (q,  $^1J_{\text{B-C}}$  = 49.8 Hz, *ipso*-C<sub>6</sub>H<sub>3</sub>) ppm.

$^{11}\text{B}\{^1\text{H}\}$  NMR (128 MHz, [D8]THF):  $\delta$  = -6.48 ppm.

$^{19}\text{F}\{^1\text{H}\}$  NMR (377 MHz, [D8]THF):  $\delta$  = -63.42 ppm.

IR (KBr):  $\nu$  = 1766 (m, ZnH), 1610 cm<sup>-1</sup> (m, ZnH).

Anal. Calcd. for C<sub>94</sub>H<sub>100</sub>B<sub>2</sub>F<sub>48</sub>N<sub>6</sub>Zn<sub>3</sub> (2443.56 g · mol<sup>-1</sup>): C, 46.20; H, 4.13; N, 3.44. Found: C, 46.10; H, 4.71; N, 3.59%.

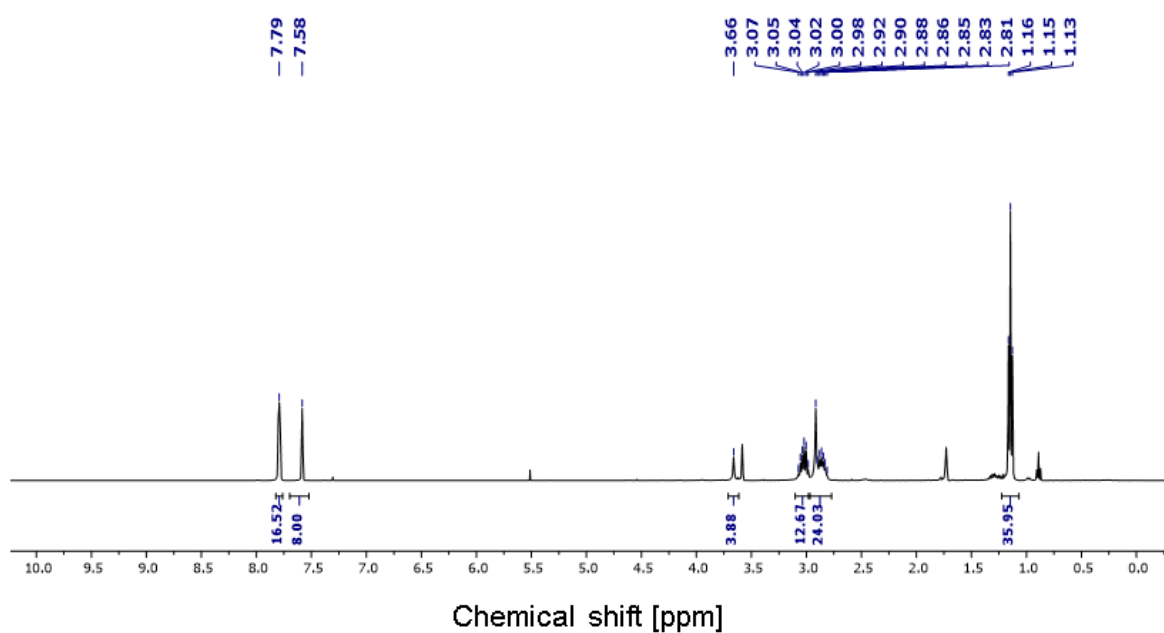

**Figure S49:**  $^1\text{H}$  NMR spectrum of  $[(\text{TEEDA})_3\text{Zn}_3\text{H}_4][\text{B}(3,5\text{-(CF}_3)_2\text{-C}_6\text{H}_3)_2]$  (**4b**) in [D8]THF.

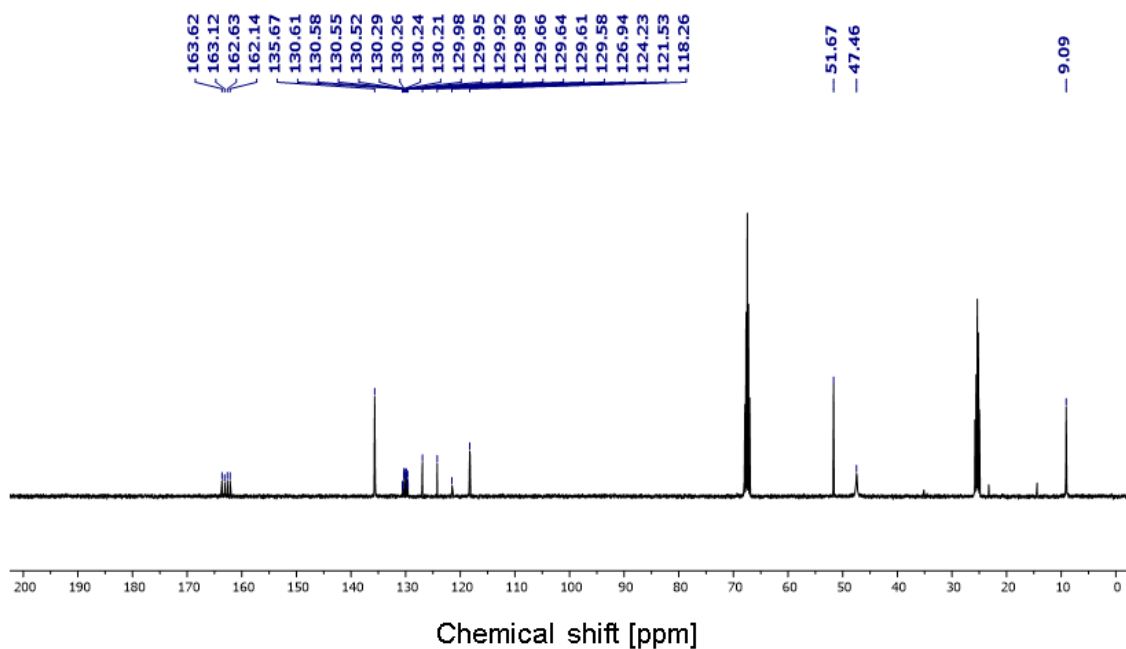

**Figure S50:**  $^{13}\text{C}\{^1\text{H}\}$  NMR spectrum of  $[(\text{TEEDA})_3\text{Zn}_3\text{H}_4][\text{B}(3,5\text{-(CF}_3)_2\text{-C}_6\text{H}_3)_2]$  (**4b**) in  $[\text{D}_8]\text{THF}$ .

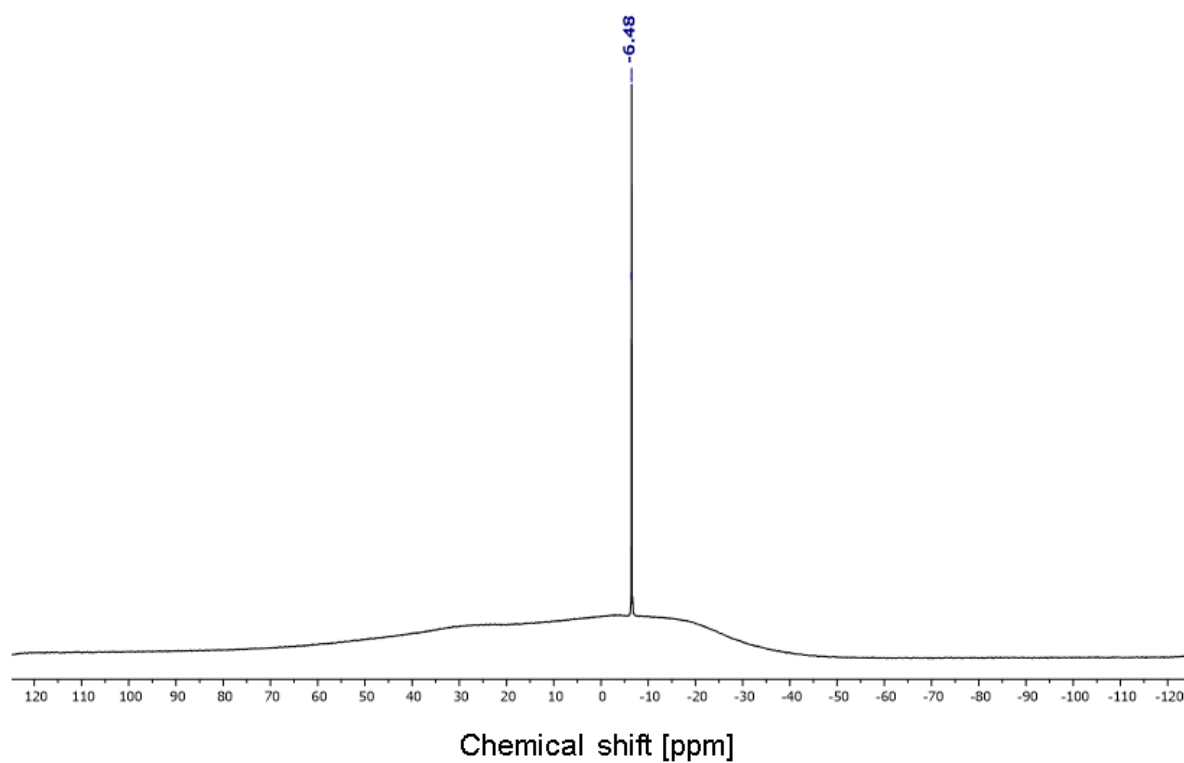

**Figure S51:**  $^{11}\text{B}\{^1\text{H}\}$  NMR spectrum of  $[(\text{TEEDA})_3\text{Zn}_3\text{H}_4][\text{B}(3,5\text{-(CF}_3)_2\text{-C}_6\text{H}_3)_2]$  (**4b**) in  $[\text{D}_8]\text{THF}$ .

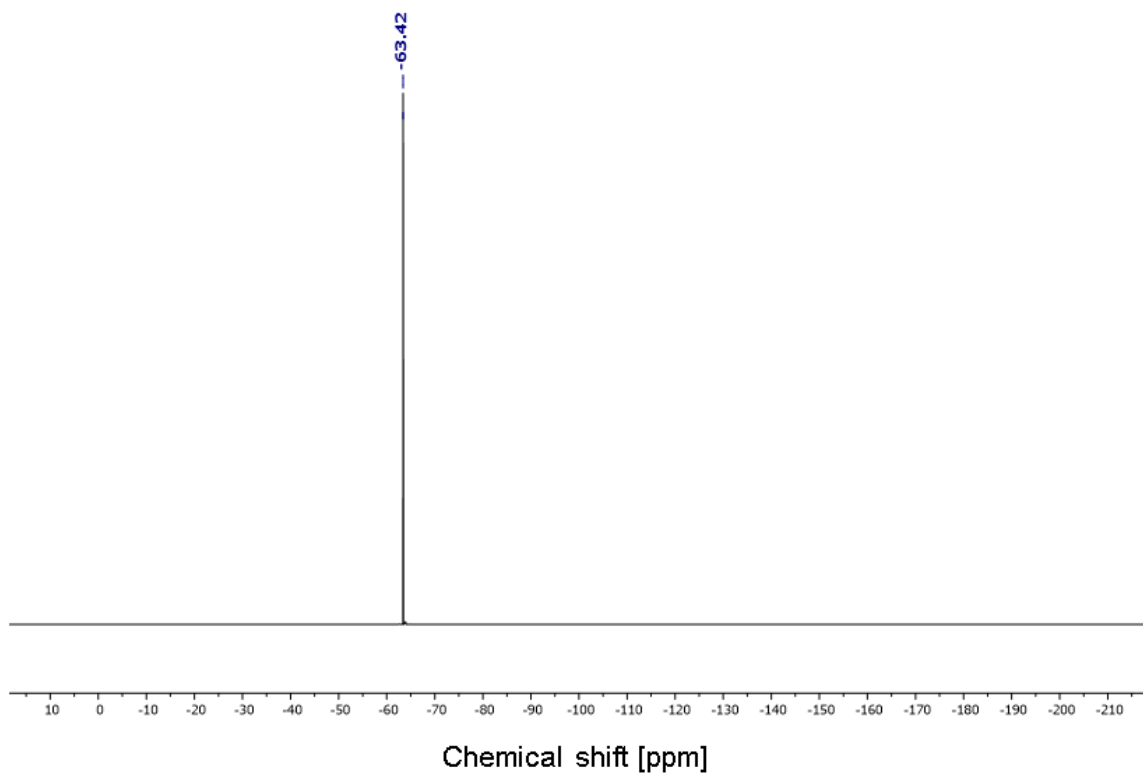

**Figure S52:**  $^{19}\text{F}\{^1\text{H}\}$  NMR spectrum of  $[(\text{TEEDA})_3\text{Zn}_3\text{H}_4][\text{B}(3,5\text{-(CF}_3)_2\text{-C}_6\text{H}_3)_2]$  (**4b**) in  $[\text{D}_8]\text{THF}$ .

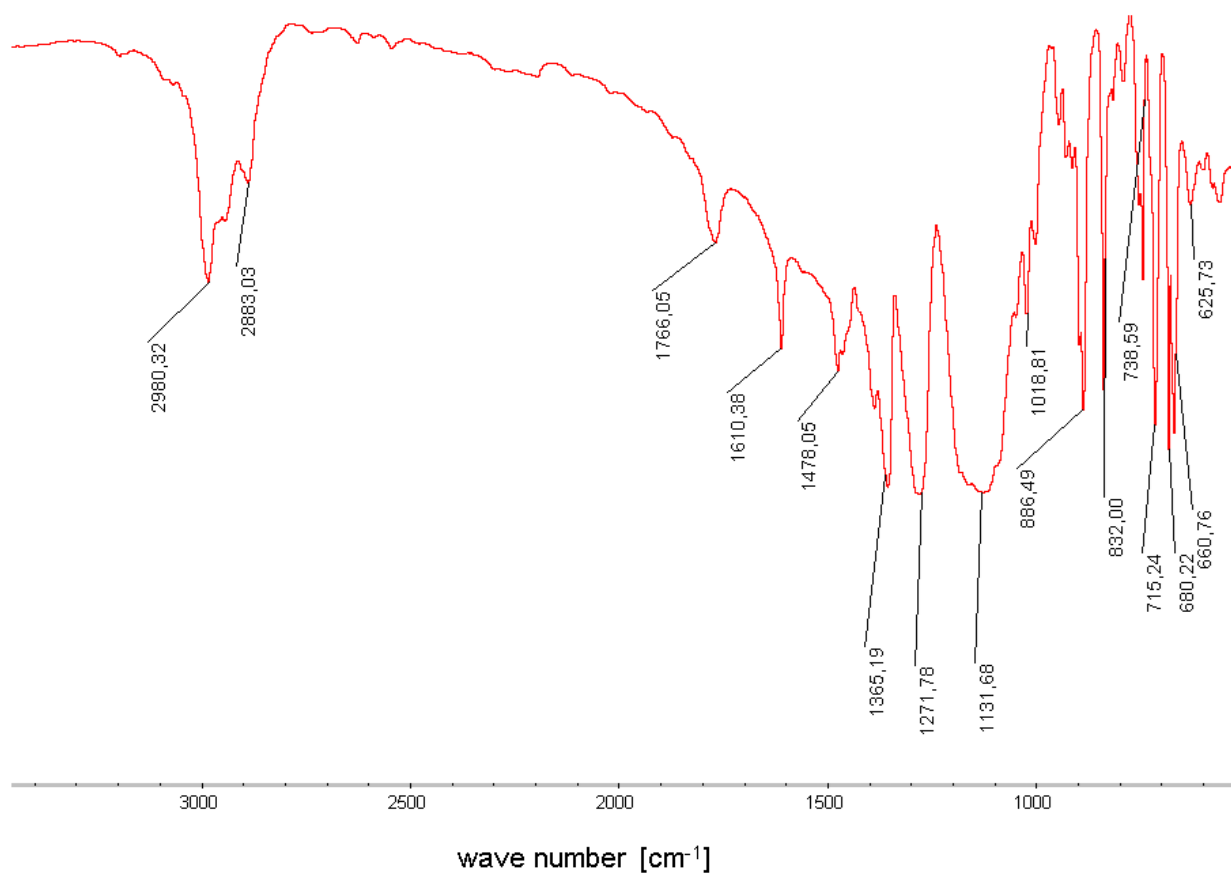

**Figure S53:** IR spectrum (KBr pellet) of  $[(\text{TEEDA})_3\text{Zn}_3\text{H}_4][\text{B}(3,5\text{-(CF}_3)_2\text{-C}_6\text{H}_3)_2]$  (**4b**).

**Synthesis of  $[(\text{TEEDA})\text{Zn}(\mu\text{-H}_2)]\{(\text{TMEDA})\text{ZnH}\}_2][\text{B}(3,5\text{-CF}_3)_2\text{-C}_6\text{H}_3)]_2$  (**4c**).**

To a suspension of  $[\text{ZnH}_2]_n$  (3 mg, 45  $\mu\text{mol}$ ) and TEEDA (8 mg, 45  $\mu\text{mol}$ ) THF (5 mL) was added a solution of  $[(\text{TMEDA})\text{ZnH}(\text{thf})][\text{B}(3,5\text{-CF}_3)_2\text{-C}_6\text{H}_3)_4]$  (100 mg, 89  $\mu\text{mol}$ ) in THF (5 mL). The reaction mixture was stirred at room temperature until all solid material had dissolved (approximately 15 min). The solvent volume was reduced in *vacuo*. Addition of *n*-pentane resulted in the precipitation of a colorless solid which was isolated by decantation and subsequent drying under reduced pressure to give colorless solid (102 mg, 43  $\mu\text{mol}$ ). Yield: 95%.

$^1\text{H}$  NMR (400 MHz,  $[\text{D}_8]\text{THF}$ ):  $\delta$  = 1.14 (t,  $^3J_{\text{H-H}} = 7.1$  Hz, N-CH<sub>2</sub>CH<sub>3</sub>, 12H), 2.59 (s, N-CH<sub>3</sub>, 24H), 2.84 (s, N-CH<sub>2</sub>, 8H), 2.86 – 2.90 (m, N-CH<sub>2</sub>CH<sub>3</sub>, 4H), 2.92 (s, N-CH<sub>2</sub>, 4H), 2.97 – 3.09 (m, N-CH<sub>2</sub>CH<sub>3</sub>, 4H), 3.67 (s, Zn-H, 4H), 7.59 (s, *para*-C<sub>6</sub>H<sub>3</sub>, 8H), 7.80 (s, *ortho*-C<sub>6</sub>H<sub>3</sub>, 16H).

$^{13}\text{C}\{^1\text{H}\}$  NMR (101 MHz,  $[\text{D}_8]\text{THF}$ ):  $\delta$  = 9.14 (N-CH<sub>2</sub>CH<sub>3</sub>), 47.58 (N-CH<sub>2</sub>CH<sub>3</sub>), 48.13 (N-CH<sub>3</sub>), 51.71 (N-CH<sub>2</sub>), 58.02 (N-CH<sub>2</sub>), 118.28 (*para*-C<sub>6</sub>H<sub>3</sub>), 125.60 (q,  $^1J_{\text{C-F}} = 272.2$  Hz, CF<sub>3</sub>), 130.06 (qq,  $^1J_{\text{C-F}} = 31.5$  Hz,  $^3J_{\text{B-C}} = 2.8$  Hz, *meta*-C<sub>6</sub>H<sub>3</sub>), 135.68 (*ortho*-C<sub>6</sub>H<sub>3</sub>), 162.89 (q,  $^1J_{\text{B-C}} = 49.8$  Hz, *ipso*-C<sub>6</sub>H<sub>3</sub>) ppm.

$^{11}\text{B}\{^1\text{H}\}$  NMR (128 MHz,  $[\text{D}_8]\text{THF}$ ):  $\delta$  = -6.49 ppm.

$^{19}\text{F}\{^1\text{H}\}$  NMR (377 MHz,  $[\text{D}_8]\text{THF}$ ):  $\delta$  = -63.38 ppm.

IR (KBr):  $\nu$  = 1774 (m, ZnH), 1611  $\text{cm}^{-1}$  (m, ZnH).

Anal. Calcd. for C<sub>86</sub>H<sub>84</sub>B<sub>2</sub>F<sub>48</sub>N<sub>6</sub>Zn<sub>3</sub> (2331.34 g · mol<sup>-1</sup>): C, 44.31; H, 3.63; N, 3.60. Found: C, 42.99; H, 3.79; N, 3.74%.

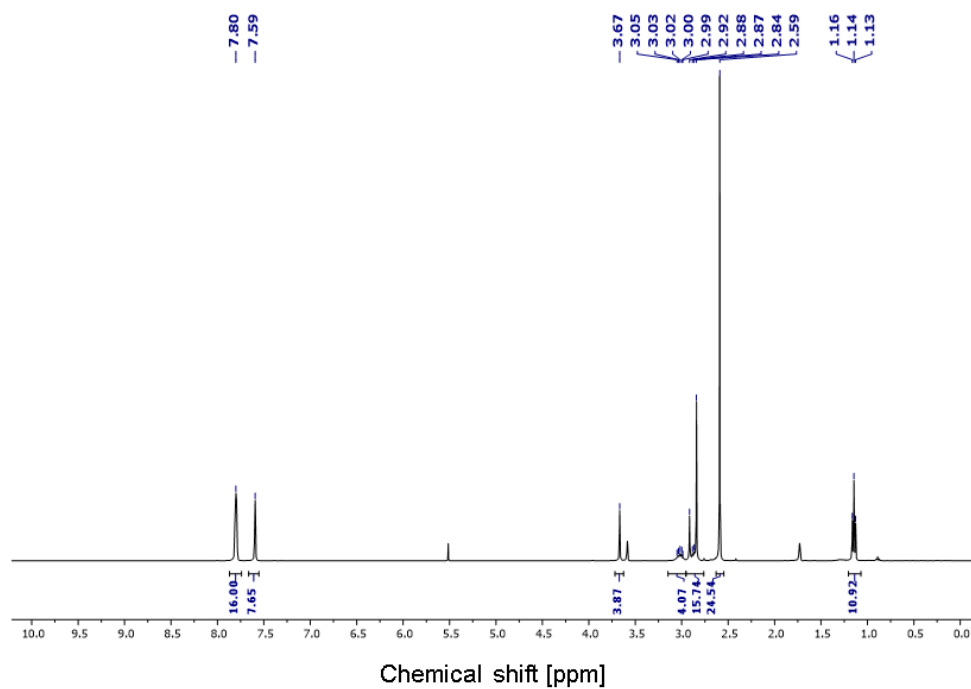

**Figure S54:**  $^1\text{H}$  NMR spectrum of  $[\{(\text{TEEDA})\text{Zn}(\mu\text{-H}_2)\}\{(\text{TMEDA})\text{ZnH}_2\}][\text{B}(3,5\text{-}(\text{CF}_3)_2\text{-C}_6\text{H}_3)_2]$  (**4c**) in  $[\text{D}_8]\text{THF}$ .

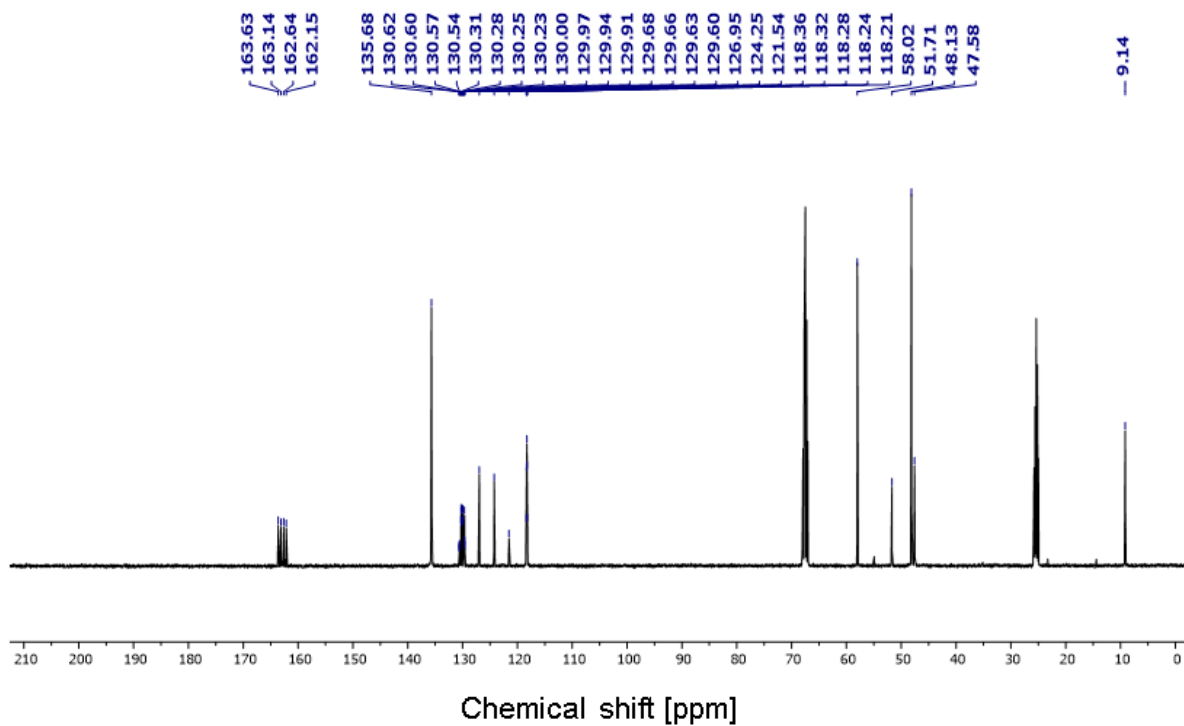

**Figure S55:**  $^{13}\text{C}\{^1\text{H}\}$  NMR spectrum of  $[\{(\text{TEEDA})\text{Zn}(\mu\text{-H}_2)\}\{(\text{TMEDA})\text{ZnH}_2\}][\text{B}(3,5\text{-}(\text{CF}_3)_2\text{-C}_6\text{H}_3)_2]$  (**4c**) in  $[\text{D}_8]\text{THF}$ .

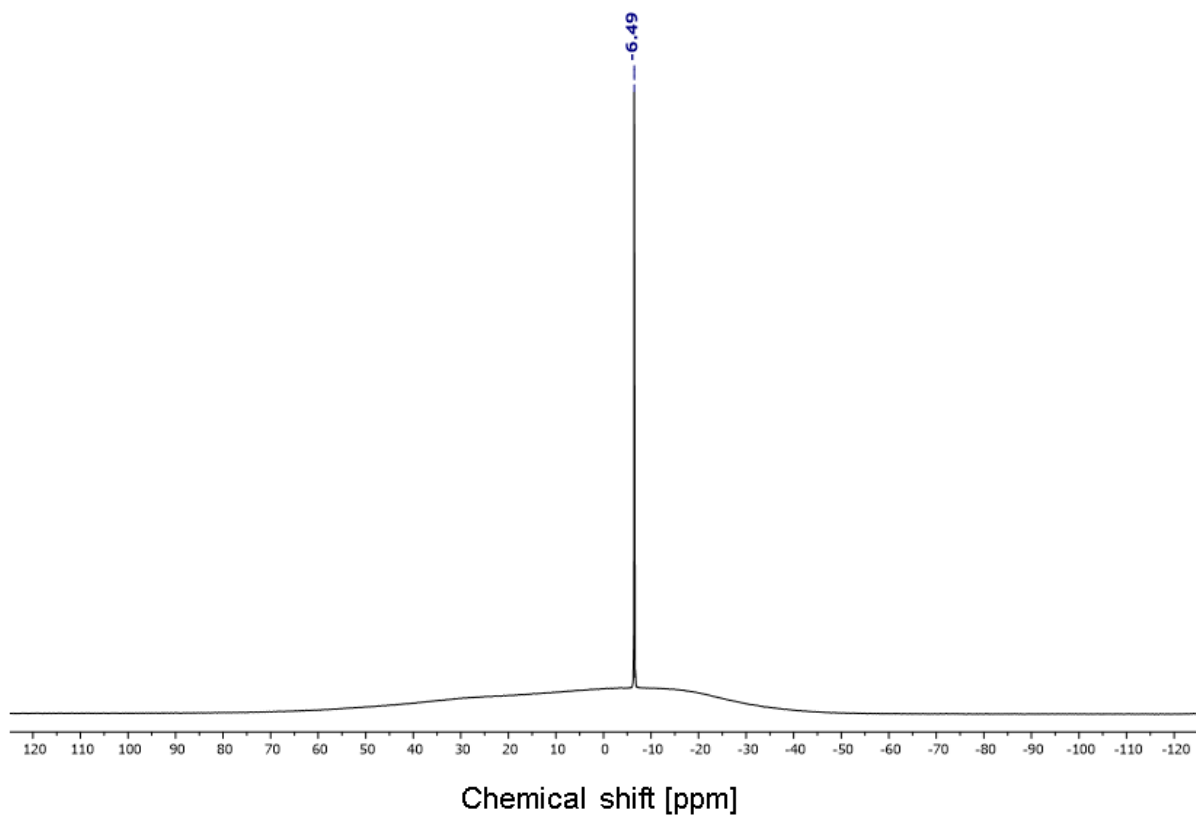

**Figure S56:**  $^{11}\text{B}\{^1\text{H}\}$  NMR spectrum of  $[\{(\text{TEEDA})\text{Zn}(\mu\text{-H}_2)\}(\text{TMEDA})\text{ZnH}_2][\text{B}(3,5\text{-}(\text{CF}_3)_2\text{-C}_6\text{H}_3)_2]$  (**4c**) in  $[\text{D}_8]\text{THF}$ .

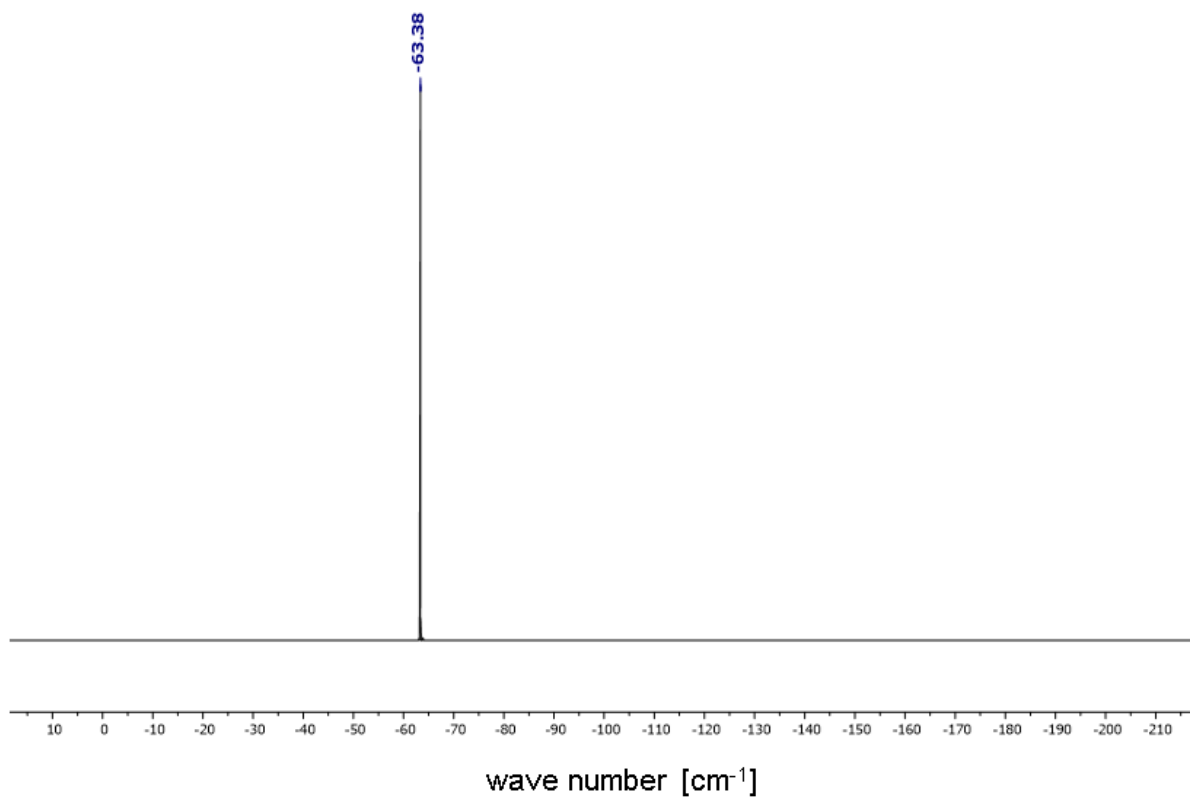

**Figure S57:**  $^{19}\text{F}\{^1\text{H}\}$  NMR spectrum of  $[\{(\text{TEEDA})\text{Zn}(\mu\text{-H}_2)\}(\text{TMEDA})\text{ZnH}_2][\text{B}(3,5\text{-}(\text{CF}_3)_2\text{-C}_6\text{H}_3)_2]$  (**4c**) in  $[\text{D}_8]\text{THF}$ .

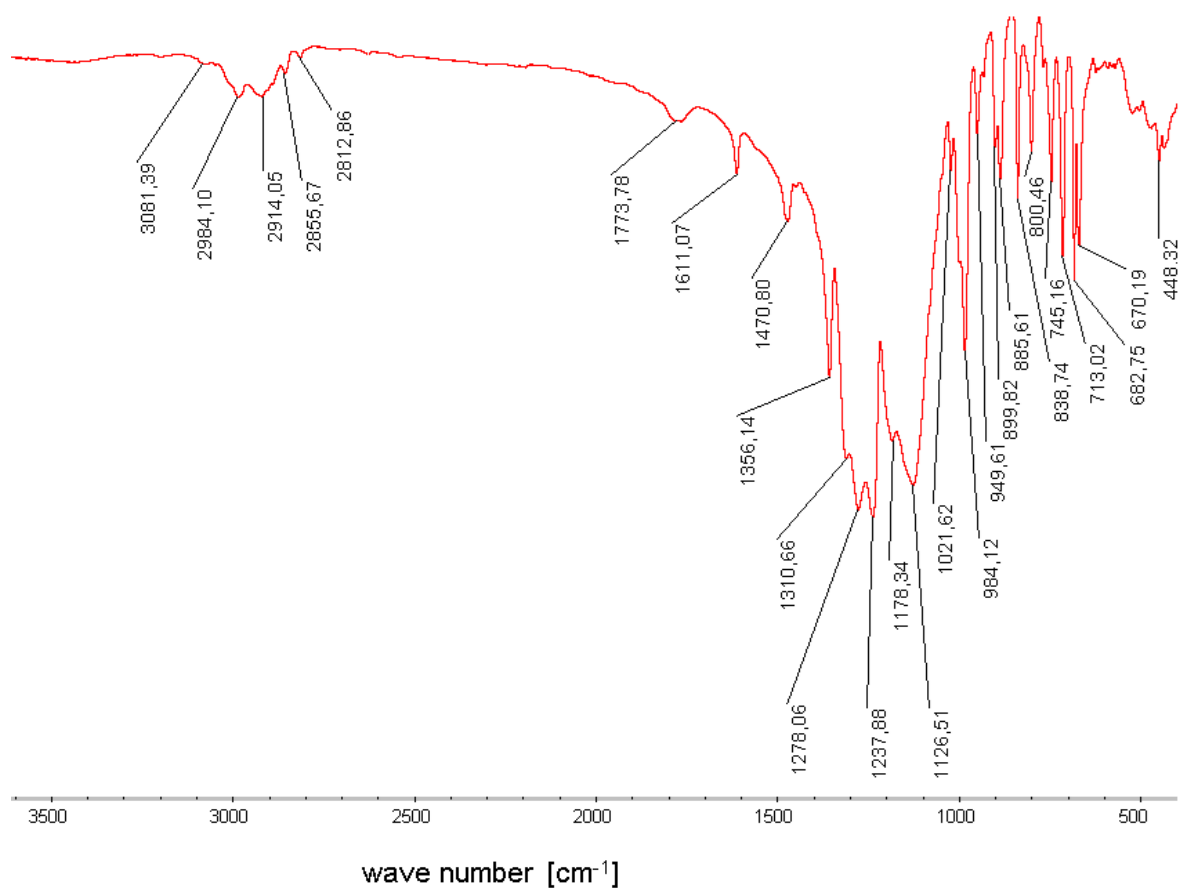

**Figure S58:** IR spectrum (KBr pellet) [ $\{(\text{TEEDA})\text{Zn}(\mu\text{-H})_2\}(\text{TMEDA})\text{ZnH}_2$ ][ $\text{B}(3,5\text{-}(\text{CF}_3)_2\text{-C}_6\text{H}_3)_2$ ]**(4c)**.



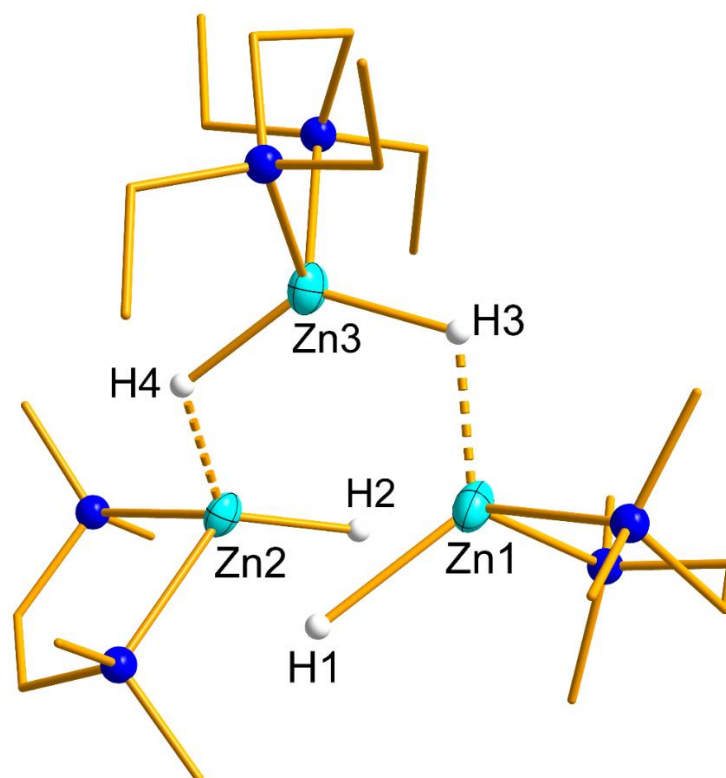

Molecular structure of **4c**. Displacement parameters of the zinc and nitrogen atoms are set at 40% probability level. The borate anions and hydrogen atoms except of H1, H2, H3 and H4 are omitted for clarity. Selected bond distances [Å] and angles [°]: Zn1-H1 1.75(6), Zn1-H3 1.89(2), Zn3-H3 1.78(6), Zn3-H4 1.62(6), Zn2-H4 1.78(2), Zn2-H2 1.61(6), H1-Zn1-H3 125(3), H3-Zn3-H4 130(3), H4-Zn2-H2 118(3)..

### Synthesis of [(TMEDA)Zn(OCHO)]<sub>2</sub>[B(3,5-(CF<sub>3</sub>)<sub>2</sub>-C<sub>6</sub>H<sub>3</sub>)<sub>4</sub>]<sub>2</sub> (**5a**).

A solution of [(TMEDA)<sub>2</sub>ZnH(thf)][B(3,5-(CF<sub>3</sub>)<sub>2</sub>-C<sub>6</sub>H<sub>3</sub>)<sub>4</sub>] (200 mg, 179 μmol) in THF (1 mL) was transferred into a Schlenk tube, degassed by three cycles of “freeze-pump-thaw” and pressurized with CO<sub>2</sub> (1 bar). The reaction mixture was layered with *n*-pentane and placed in the freezer at -30 °C. After standing overnight crystals formed which were isolated by decantation of the mother liquor and subsequent drying *in vacuo* to give [(TMEDA)<sub>2</sub>Zn(OCHO)]<sub>2</sub>[B(3,5-(CF<sub>3</sub>)<sub>2</sub>-C<sub>6</sub>H<sub>3</sub>)<sub>4</sub>]<sub>2</sub> as a colorless solid (185 mg, 84 μmol). Yield: 94 %.

<sup>1</sup>H NMR (400 MHz, [D<sub>8</sub>]THF): δ = 2.62 (s, N-CH<sub>3</sub>, 24H), 2.91 (s, N-CH<sub>2</sub>, 8H), 7.58 (s, *para*-C<sub>6</sub>H<sub>3</sub>, 4H), 7.79 (s, *ortho*-C<sub>6</sub>H<sub>3</sub>, 8H), 8.26 (s, Zn-OCHO, 2H) ppm.

<sup>13</sup>C{<sup>1</sup>H} NMR (101 MHz, [D<sub>8</sub>]THF): δ = 47.34 (N-CH<sub>3</sub>), 57.60 (N-CH<sub>2</sub>), 118.24 (*para*-C<sub>6</sub>H<sub>3</sub>), 125.59 (q, <sup>1</sup>J<sub>C-F</sub> = 272.2 Hz, CF<sub>3</sub>), 130.27 (qq, <sup>2</sup>J<sub>C-F</sub> = 31.8 Hz, <sup>3</sup>J<sub>B-C</sub> = 2.9 Hz, *meta*-C<sub>6</sub>H<sub>3</sub>), 135.67 (*ortho*-C<sub>6</sub>H<sub>3</sub>), 162.88 (q, <sup>1</sup>J<sub>B-C</sub> = 49.8 Hz, *ipso*-C<sub>6</sub>H<sub>3</sub>), 171.87 (Zn-OCHO) ppm.

<sup>11</sup>B{<sup>1</sup>H} NMR (128 MHz, [D<sub>8</sub>]THF): δ = -6.48 ppm.

<sup>19</sup>F{<sup>1</sup>H} NMR (377 MHz, [D<sub>8</sub>]THF): δ = -63.41 ppm.

IR (KBr): ν = 1649 cm<sup>-1</sup> (s, ZnOCHO).

Anal. Calcd. for C<sub>78</sub>H<sub>58</sub>B<sub>2</sub>F<sub>48</sub>N<sub>4</sub>O<sub>4</sub>Zn<sub>2</sub> (2179.65 g · mol<sup>-1</sup>): C, 42.98; H, 2.68; N, 2.57. Found: C, 43.62; H, 3.67; N, 2.38%.

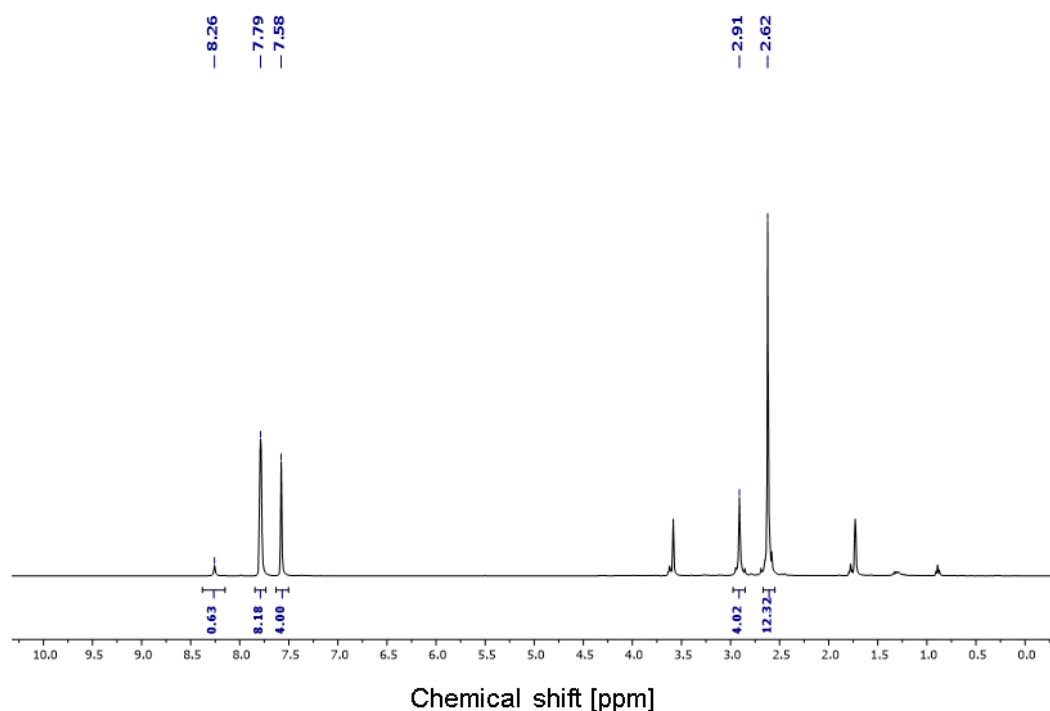

Figure S59: <sup>1</sup>H NMR spectrum of [(TMEDA)Zn(OCHO)]<sub>2</sub>[B(3,5-(CF<sub>3</sub>)<sub>2</sub>-C<sub>6</sub>H<sub>3</sub>)<sub>4</sub>]<sub>2</sub> (**5a**) in [D<sub>8</sub>]THF.

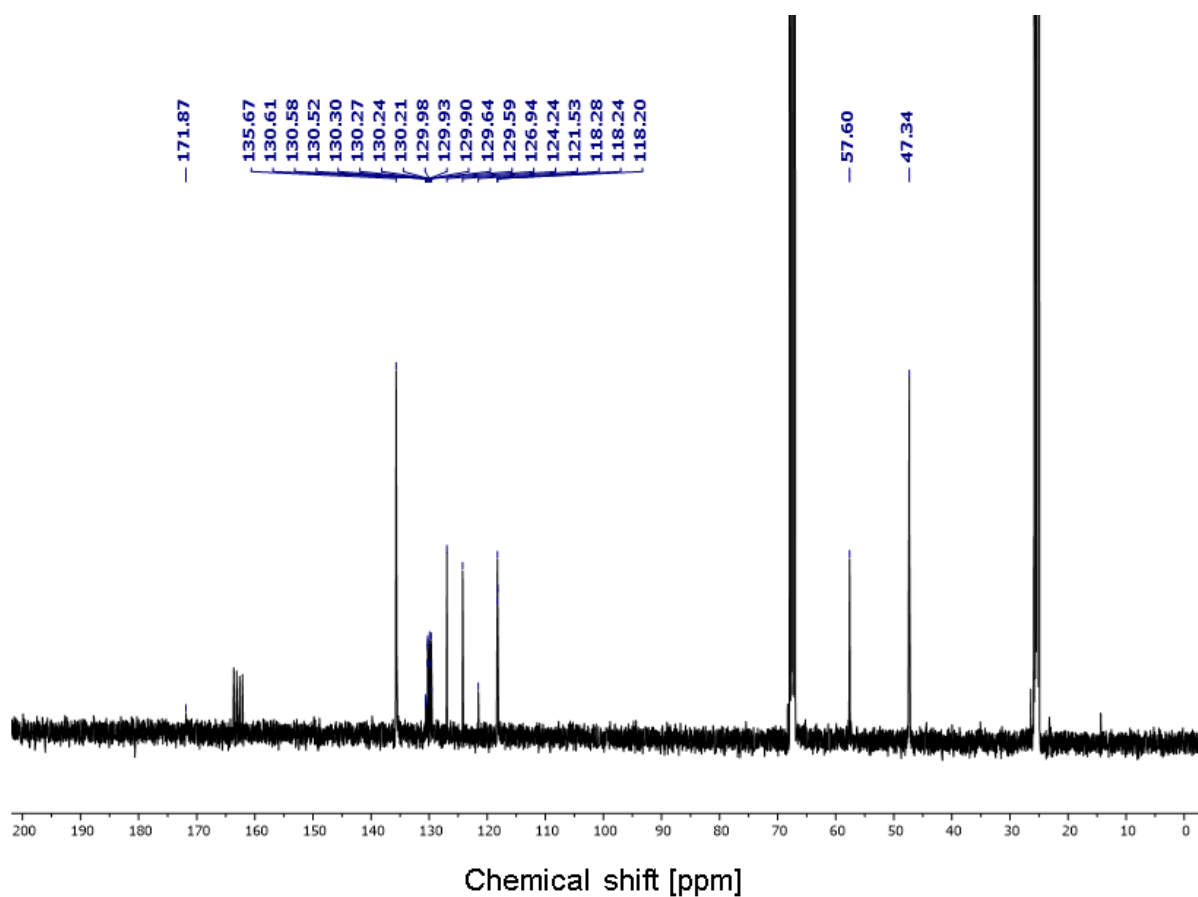

**Figure S60:**  $^{13}\text{C}\{^1\text{H}\}$  NMR spectrum of  $[(\text{TMEDA})\text{Zn}(\text{OCHO})_2][\text{B}(3,5\text{-(CF}_3)_2\text{-C}_6\text{H}_3)_4]_2$  (**5a**) in  $[\text{D}_8]\text{THF}$ .

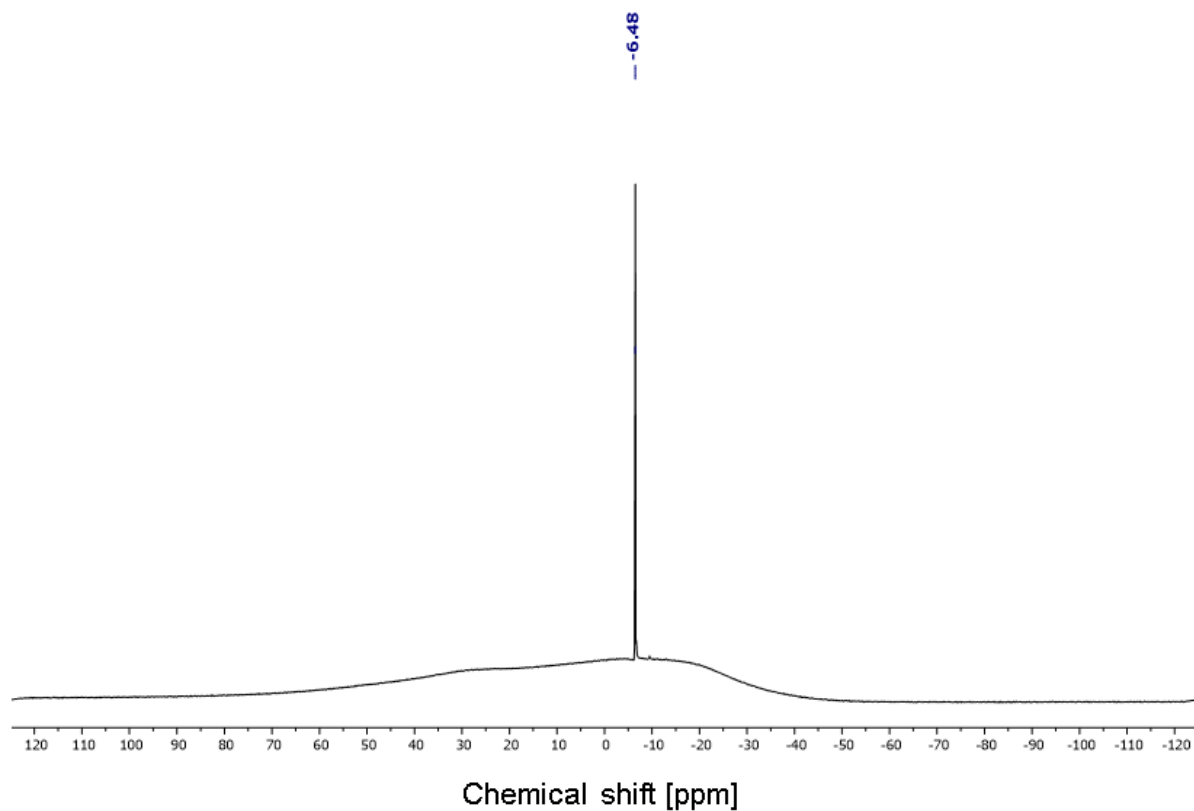

**Figure S61:**  $^{11}\text{B}\{^1\text{H}\}$  NMR spectrum of  $[(\text{TMEDA})\text{Zn}(\text{OCHO})_2][\text{B}(3,5\text{-(CF}_3)_2\text{-C}_6\text{H}_3)_4]_2$  (**5a**) in  $[\text{D}_8]\text{THF}$ .

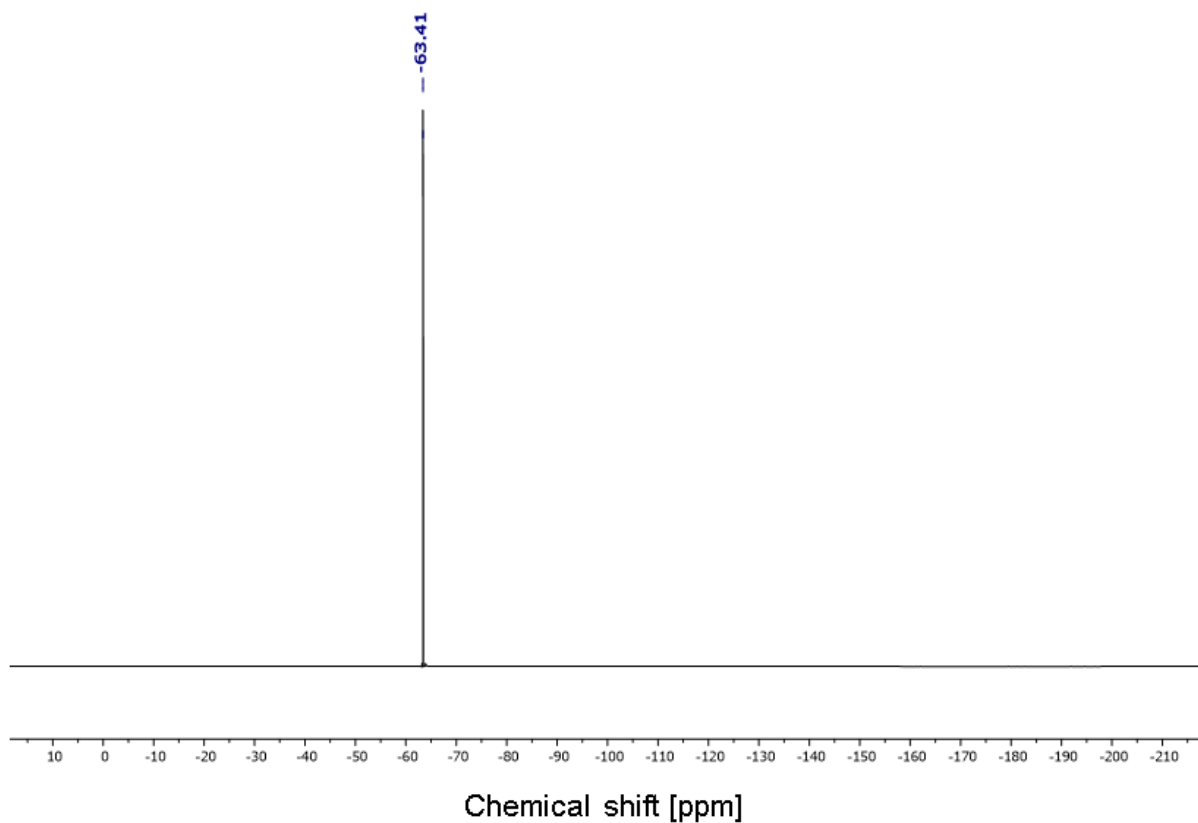

**Figure S62:**  $^{19}\text{F}\{^1\text{H}\}$  NMR spectrum of  $[(\text{TMEDA})\text{Zn}(\text{OCHO})]_2[\text{B}(3,5\text{-(CF}_3)_2\text{-C}_6\text{H}_3)_4]_2$  (**5a**) in  $[\text{D}_8]\text{THF}$ .

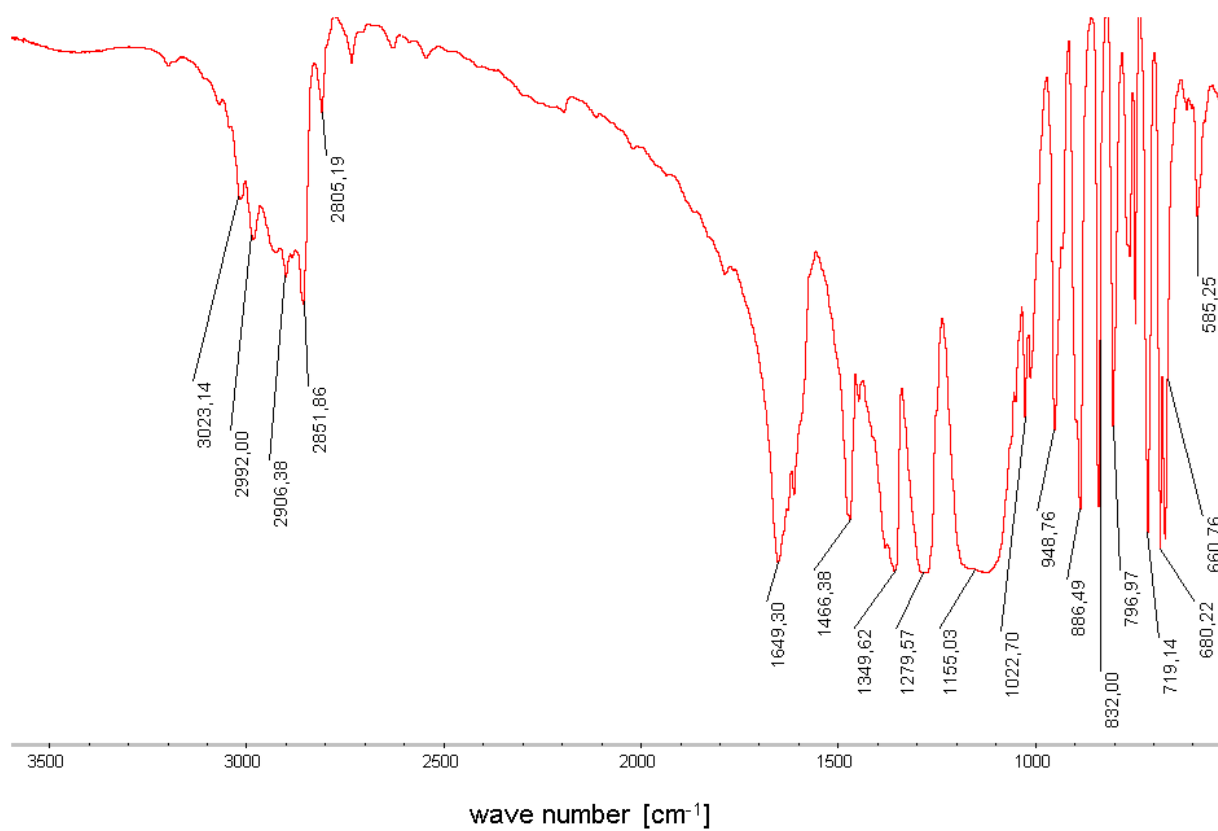

**Figure S63:** IR spectrum (KBr pellet) of  $[(\text{TMEDA})\text{Zn}(\text{OCHO})]_2[\text{B}(3,5\text{-(CF}_3)_2\text{-C}_6\text{H}_3)_4]_2$  (**5a**).

### Synthesis of [(TEEDA)Zn(OCHO)]<sub>2</sub>[B(3,5-(CF<sub>3</sub>)<sub>2</sub>-C<sub>6</sub>H<sub>3</sub>)<sub>4</sub>]<sub>2</sub> (5b).

A solution of [(TEEDA)ZnH]<sub>2</sub>[B(3,5-(CF<sub>3</sub>)<sub>2</sub>-C<sub>6</sub>H<sub>3</sub>)<sub>4</sub>]<sub>2</sub> (200 mg, 91 μmol) in THF (1 mL) was transferred into a Schlenk tube, degassed by three cycles of “freeze-pump-thaw” and pressurized with CO<sub>2</sub> (1 bar). The reaction mixture was layered with *n*-pentane and placed in the freezer at -30 °C. After standing overnight crystals formed which were isolated by decantation of the mother liquor and subsequent drying *in vacuo*. to give [(TEEDA)<sub>2</sub>Zn(OCHO)]<sub>2</sub>[B(3,5-(CF<sub>3</sub>)<sub>2</sub>-C<sub>6</sub>H<sub>3</sub>)<sub>4</sub>]<sub>2</sub> as a colorless solid (201 mg, 88 μmol). Yield: 96 %.

<sup>1</sup>H NMR (400 MHz, [D<sub>8</sub>]THF): δ = 1.16 (t, <sup>3</sup>J<sub>H-H</sub> = 7.1 Hz, N-CH<sub>2</sub>CH<sub>3</sub>, 24H), 3.02 (m br., N-CH<sub>2</sub>CH<sub>3</sub>, 16H), 3.07 (s, N-CH<sub>2</sub>CH<sub>2</sub>, 8H), 7.59 (s, *para*-C<sub>6</sub>H<sub>3</sub>, 4H), 7.79 (s, *ortho*-C<sub>6</sub>H<sub>3</sub>, 8H), 8.23 (s, Zn-OCHO, 2H) ppm.

<sup>13</sup>C{<sup>1</sup>H} NMR (101 MHz, [D<sub>8</sub>]THF): δ = 7.74 (N-CH<sub>2</sub>CH<sub>3</sub>), 46.06 (N-CH<sub>2</sub>CH<sub>3</sub>), 50.34 (N-CH<sub>2</sub>CH<sub>2</sub>), 117.21 (*para*-C<sub>6</sub>H<sub>3</sub>), 124.53 (q, <sup>1</sup>J<sub>C-F</sub> = 272.2 Hz, CF<sub>3</sub>), 129.04 (qq, <sup>2</sup>J<sub>C-F</sub> = 31.5 Hz, <sup>3</sup>J<sub>C-B</sub> = 2.8 Hz, *meta*-C<sub>6</sub>H<sub>3</sub>), 134.61 (*ortho*-C<sub>6</sub>H<sub>3</sub>), 161.82 (q, <sup>1</sup>J<sub>B-C</sub> = 49.9 Hz, *ipso*-C<sub>6</sub>H<sub>3</sub>), 170.19 (Zn-OCHO) ppm.

<sup>11</sup>B{<sup>1</sup>H} NMR (128 MHz, [D<sub>8</sub>]THF): δ = - 6.48 ppm.

<sup>19</sup>F{<sup>1</sup>H} NMR (377 MHz, [D<sub>8</sub>]THF) : δ = -63.39 ppm.

IR (KBr): ν = 1625 cm<sup>-1</sup> (s, ZnOCHO).

Anal. Calcd. for C<sub>86</sub>H<sub>74</sub>B<sub>2</sub>F<sub>48</sub>N<sub>4</sub>O<sub>4</sub>Zn<sub>2</sub> (2291.87 g · mol<sup>-1</sup>): C, 45.07; H, 3.25; N, 2.44. Found: C, 45.28; H, 3.44; N, 2.79%.

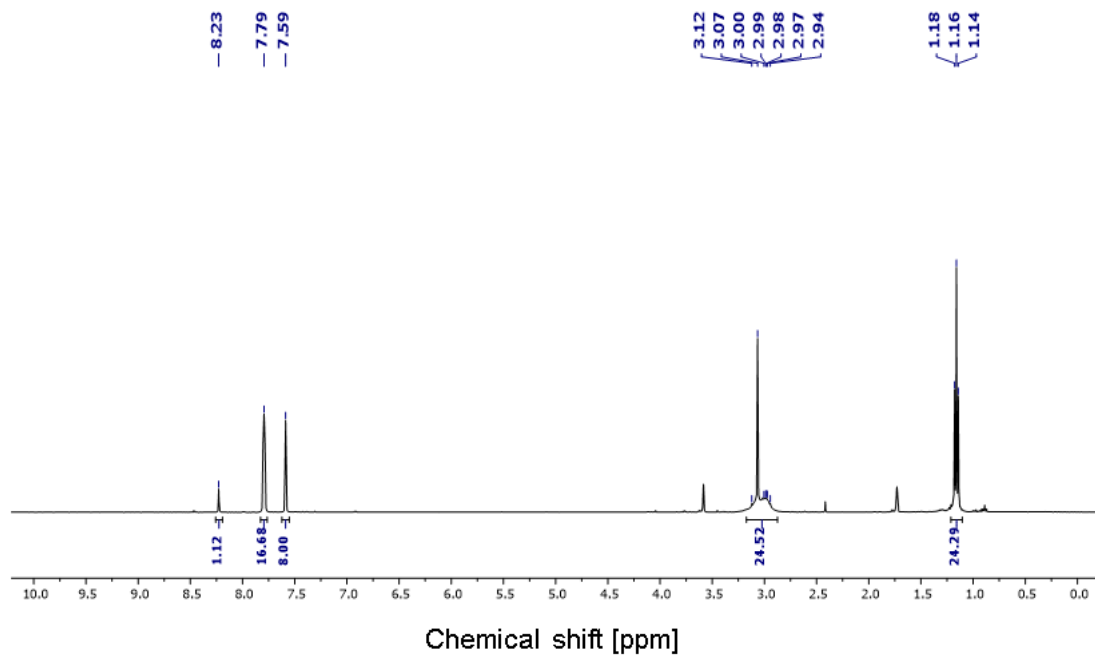

**Figure S 64:**  $^1\text{H}$  NMR spectrum of  $[(\text{TEEDA})\text{Zn}(\text{OCHO})]_2[\text{B}(3,5\text{-(CF}_3)_2\text{-C}_6\text{H}_3)_4]_2$  (**5b**) in  $[\text{D}_8]\text{THF}$ .

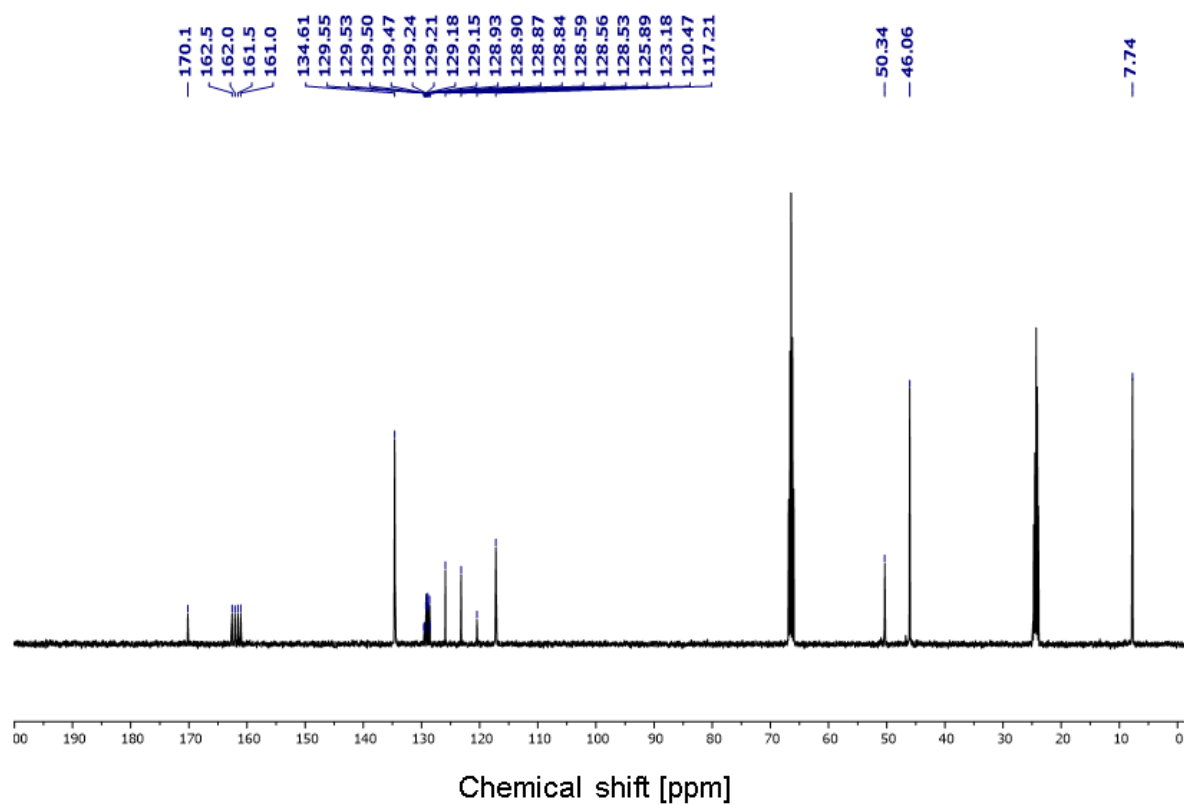

**Figure S65:**  $^{13}\text{C}\{^1\text{H}\}$  NMR spectrum of  $[(\text{TEEDA})\text{Zn}(\text{OCHO})]_2[\text{B}(3,5\text{-(CF}_3)_2\text{-C}_6\text{H}_3)_4]_2$  (**5b**) in  $[\text{D}_8]\text{THF}$ .

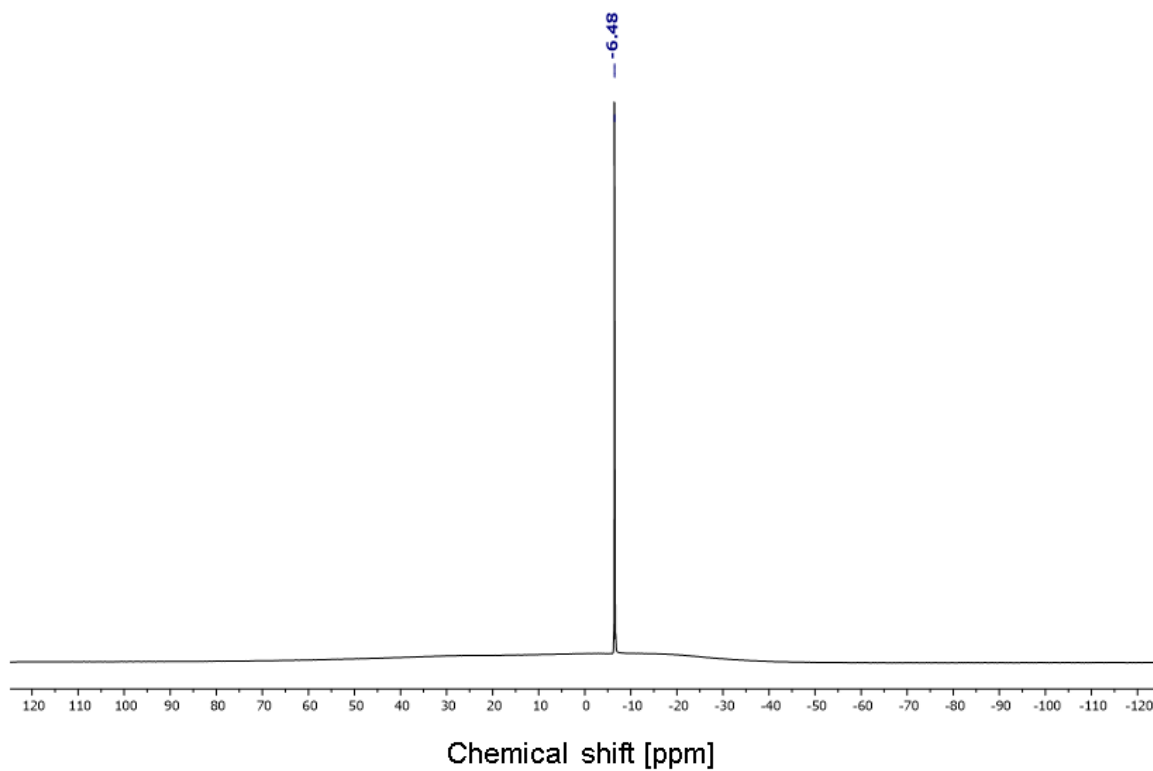

**Figure S66:**  $^{11}\text{B}\{^1\text{H}\}$  NMR spectrum of  $[(\text{TEEDA})\text{Zn}(\text{OCHO})_2][\text{B}(3,5\text{-(CF}_3)_2\text{-C}_6\text{H}_3)_4]_2$  (**5b**) in  $[\text{D}_8]\text{THF}$ .

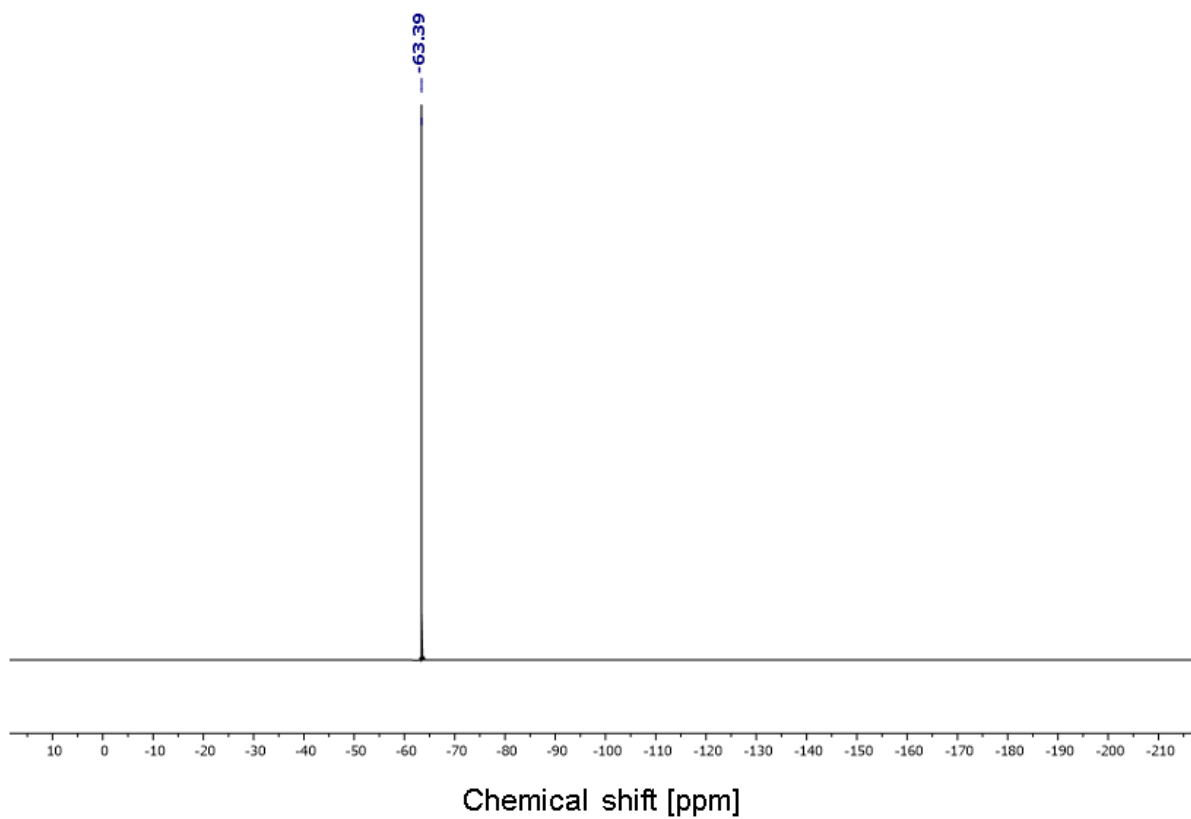

**Figure S67:**  $^{19}\text{F}\{^1\text{H}\}$  NMR spectrum of  $[(\text{TEEDA})\text{Zn}(\text{OCHO})_2][\text{B}(3,5\text{-(CF}_3)_2\text{-C}_6\text{H}_3)_4]_2$  (**5b**) in  $[\text{D}_8]\text{THF}$ .

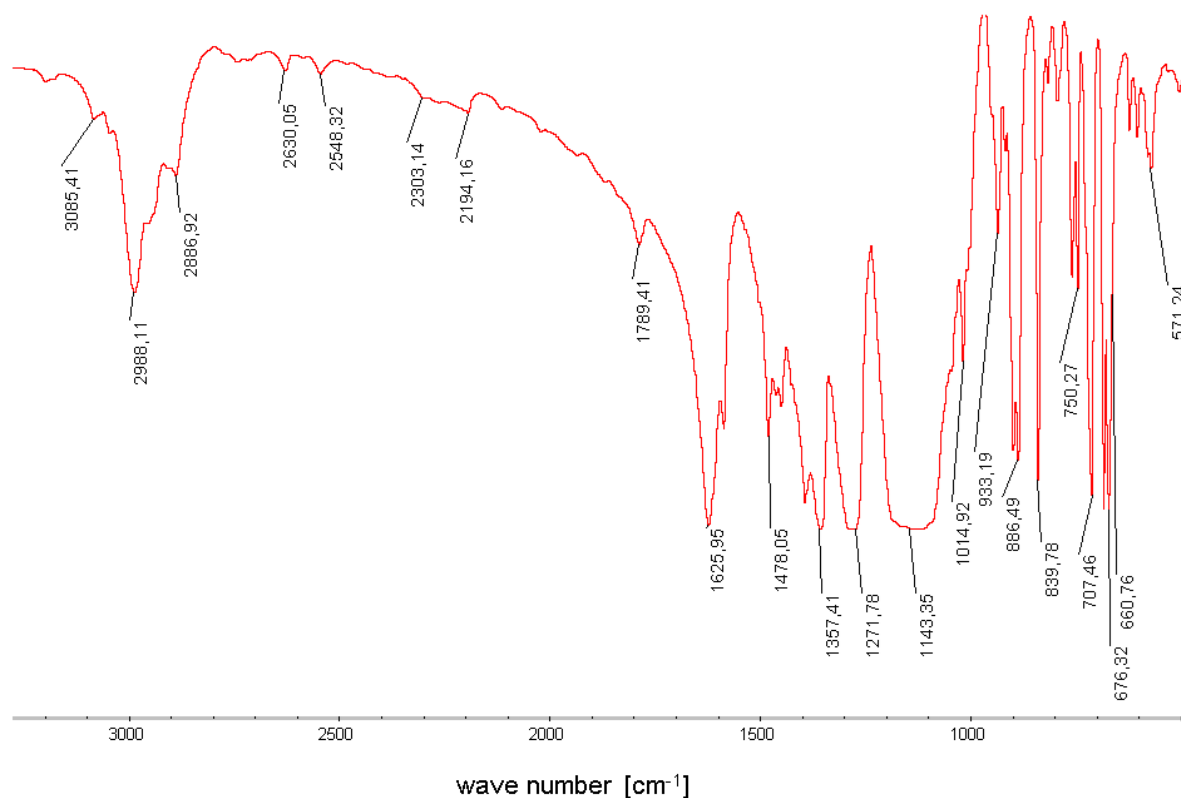

**Figure S68:** IR spectrum (KBr pellet) of  $[(\text{TEEDA})\text{Zn}(\text{OCHO})]_2[\text{B}(3,5\text{-(CF}_3)_2\text{-C}_6\text{H}_3)_4]_2$  (**5b**).

### Synthesis of $[(\text{TMEDA})_2\text{Zn}(\text{OCHO})_3][\text{B}(3,5\text{-(CF}_3)_2\text{-C}_6\text{H}_3)_4]$ (**6a**).

A solution of  $[(\text{TMEDA})_2\text{Zn}_2\text{H}_3][\text{B}(3,5\text{-(CF}_3)_2\text{-C}_6\text{H}_3)_4]$  (200 mg, 163  $\mu\text{mol}$ ) in THF (1 mL) was transferred into a Schlenk tube, degassed by three cycles of “freeze-pump-thaw” and pressurized with  $\text{CO}_2$  (1 bar). The reaction mixture was layered with *n*-pentane and placed in the freezer at  $-30\text{ }^\circ\text{C}$ . After standing overnight crystals formed which were isolated by decantation of the mother liquor and subsequent drying *in vacuo* to give  $[(\text{TMEDA})_2\text{Zn}_2(\text{OCHO})_3][\text{B}(3,5\text{-(CF}_3)_2\text{-C}_6\text{H}_3)_4]$  as colorless rods (212 mg, 156  $\mu\text{mol}$ ). Yield: 92 %.

$^1\text{H}$  NMR (400 MHz,  $[\text{D}_8]\text{THF}$ ):  $\delta$  = 2.49 (s, N- $\text{CH}_3$ , 24H), 2.76 (s, N- $\text{CH}_2$ , 8H), 7.58 (s, *para*- $\text{C}_6\text{H}_3$ , 4H), 7.79 (s, *ortho*- $\text{C}_6\text{H}_3$ , 8H), 8.26 (s, Zn-OCHO, 3H) ppm.

$^{13}\text{C}\{^1\text{H}\}$  NMR (101 MHz,  $[\text{D}_8]\text{THF}$ ):  $\delta$  = 47.04 (N- $\text{CH}_3$ ), 57.02 (N- $\text{CH}_2$ ), 118.23 (*para*- $\text{C}_6\text{H}_3$ ), 125.58 (q,  $^1J_{\text{C-F}}$  = 272.2 Hz,  $\text{CF}_3$ ), 130.10 (qq,  $^2J_{\text{C-F}}$  = 31.5 Hz,  $^3J_{\text{B-C}}$  = 2.8 Hz, *meta*- $\text{C}_6\text{H}_3$ ), 135.66 (*ortho*- $\text{C}_6\text{H}_3$ ), 162.88 (q,  $^1J_{\text{B-C}}$  = 49.9 Hz, *ipso*- $\text{C}_6\text{H}_3$ ), 170.70 (Zn-OCHO) ppm.

$^{11}\text{B}\{^1\text{H}\}$  NMR (128 MHz,  $[\text{D}_8]\text{THF}$ ):  $\delta$  = -6.60 ppm.

$^{19}\text{F}\{^1\text{H}\}$  NMR (377 MHz,  $[\text{D}_8]\text{THF}$ ):  $\delta$  = -63.43 ppm.

IR (KBr):  $\nu$  = 1653  $\text{cm}^{-1}$  (s, ZnH).



Anal. Calcd. for  $C_{47}H_{47}BF_{24}N_4O_6Zn_2$  ( $1361.45 \text{ g} \cdot \text{mol}^{-1}$ ): C, 41.96; H, 3.48; N, 4.12. Found: C, 41.55; H, 3.96; N, 4.14%.

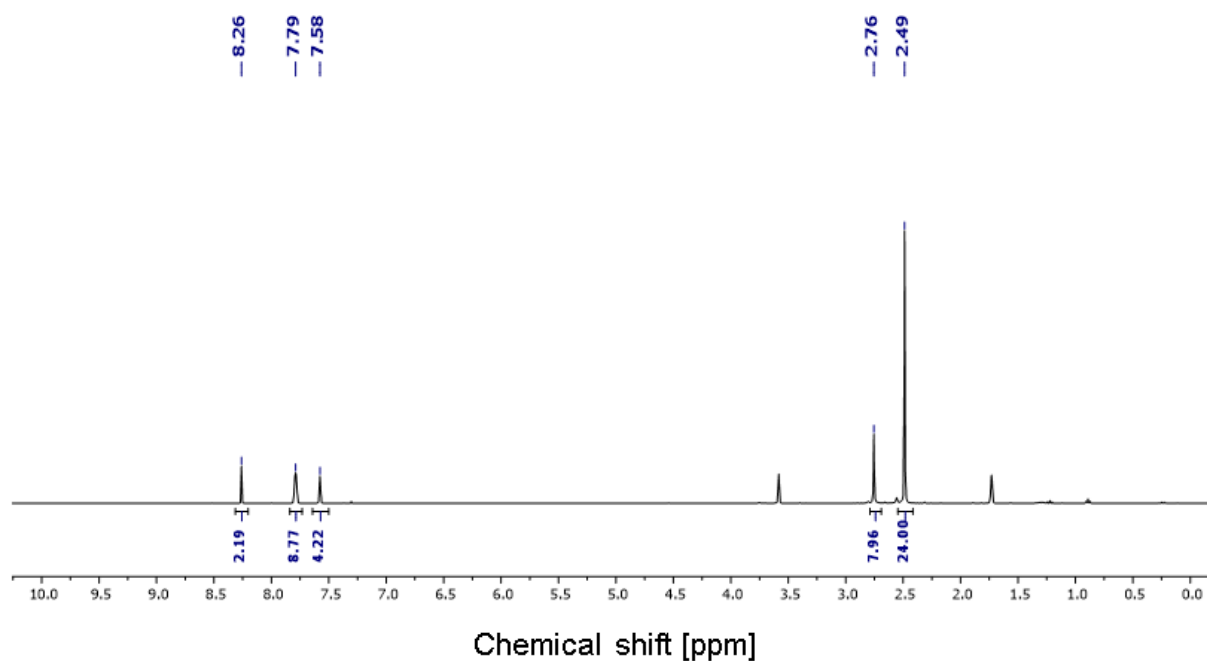

**Figure S69:**  $^1\text{H}$  NMR spectrum of  $[(\text{TMEDA})_2\text{Zn}_2(\text{OCHO})_3][\text{B}(3,5\text{-(CF}_3)_2\text{-C}_6\text{H}_3)_4]$  (**6a**) in  $[\text{D}_8]\text{THF}$ .

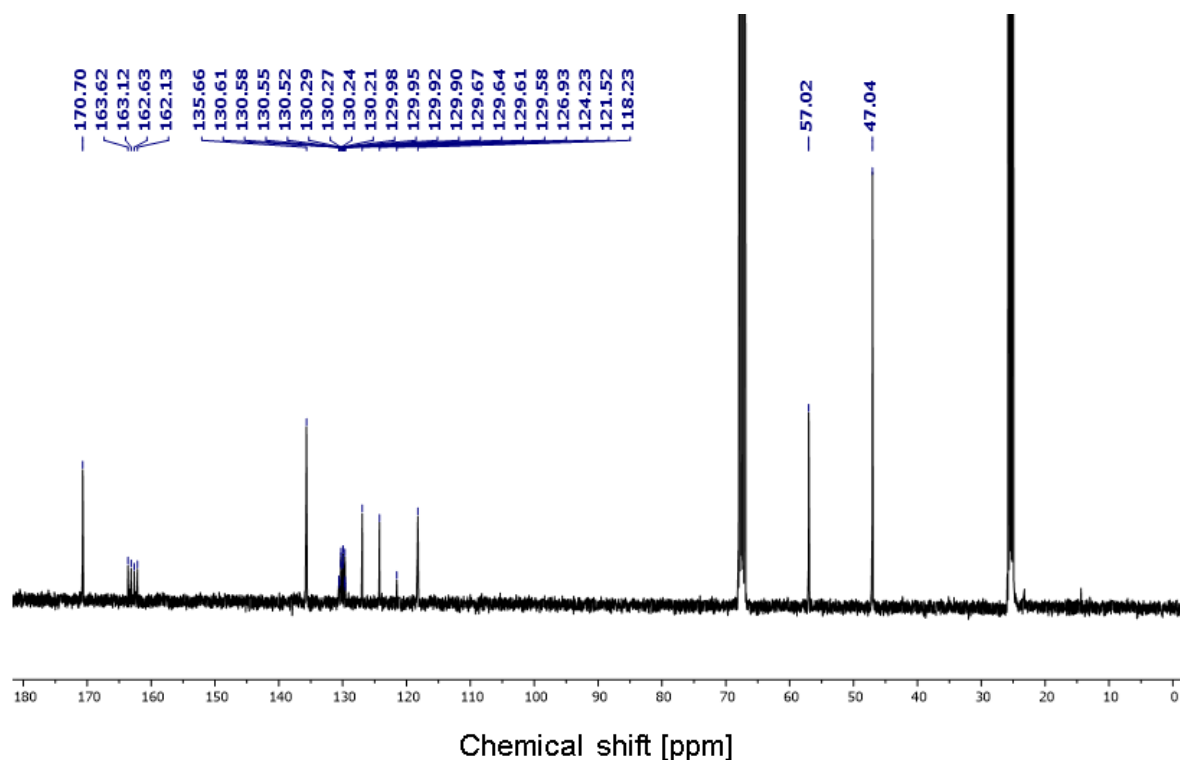

**Figure S70:**  $^{13}\text{C}\{^1\text{H}\}$  NMR spectrum of  $[(\text{TMEDA})_2\text{Zn}_2(\text{OCHO})_3][\text{B}(3,5\text{-(CF}_3)_2\text{-C}_6\text{H}_3)_4]$  (**6a**) in  $[\text{D}_8]\text{THF}$ .

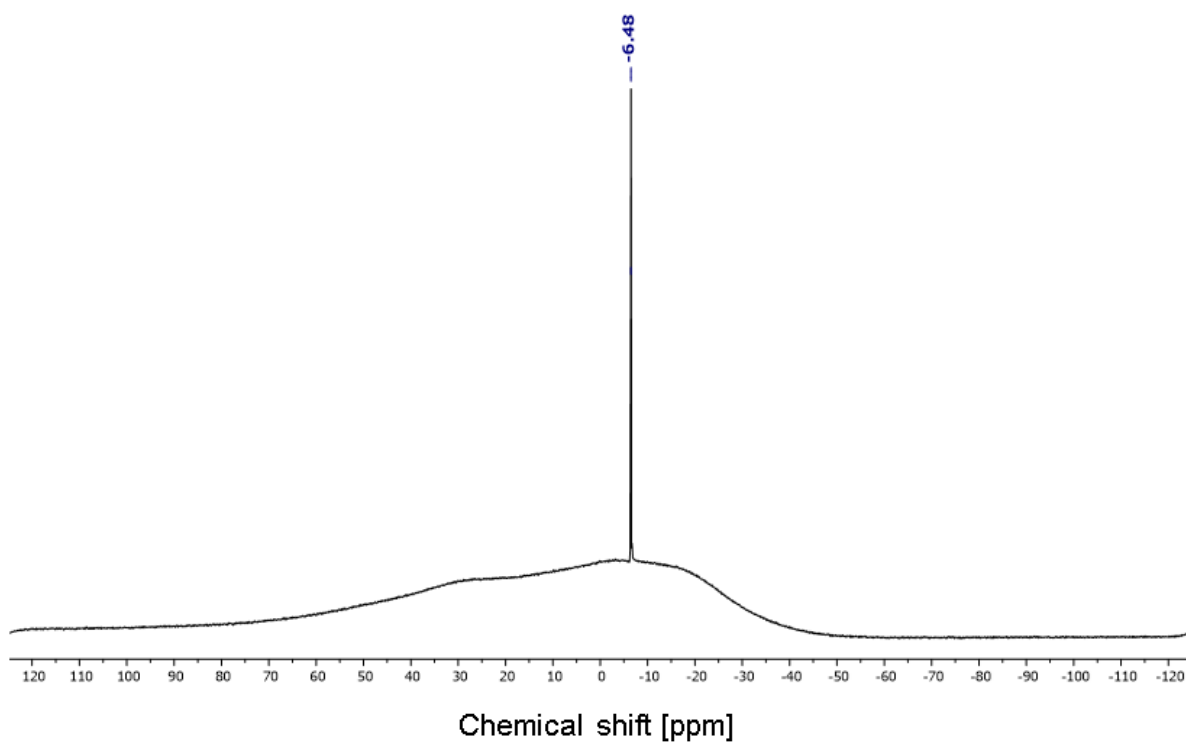

**Figure S71:**  $^{11}\text{B}\{^1\text{H}\}$  NMR spectrum of  $[(\text{TMEDA})_2\text{Zn}_2(\text{OCHO})_3][\text{B}(3,5\text{-}(\text{CF}_3)_2\text{-C}_6\text{H}_3)_4]$  (**6a**) in  $[\text{D}_8]\text{THF}$ .

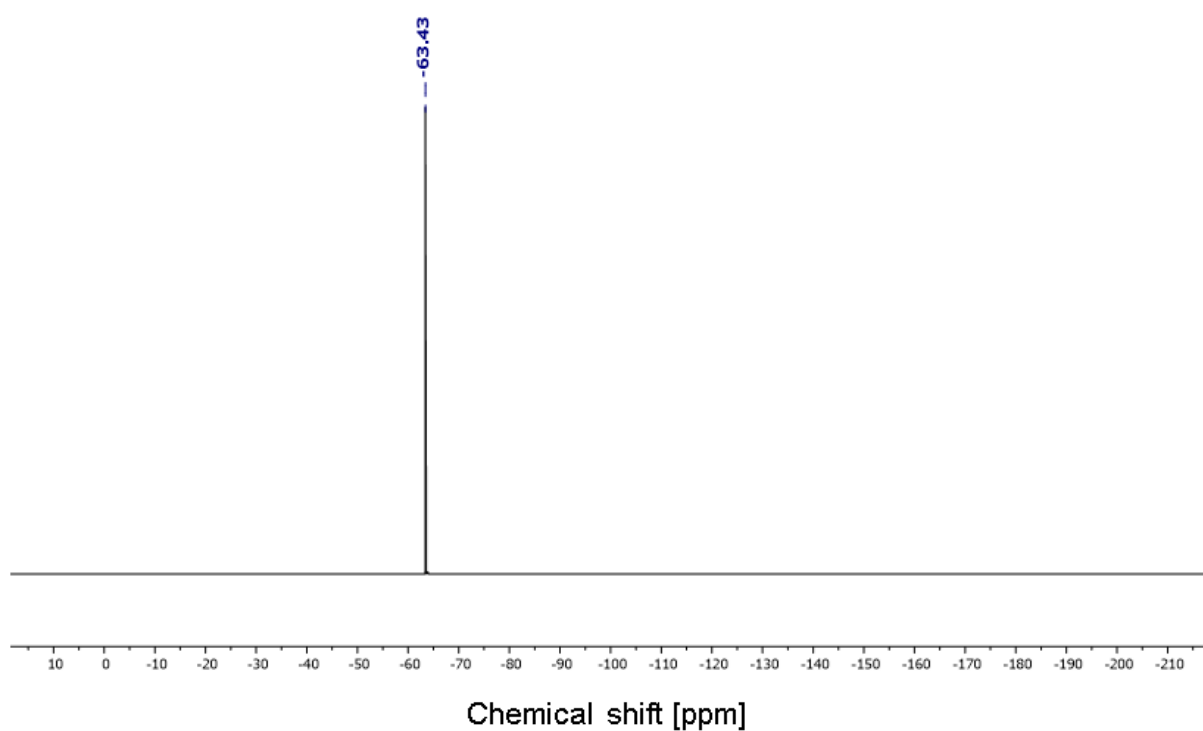

**Figure S72:**  $^{19}\text{F}\{^1\text{H}\}$  NMR spectrum of  $[(\text{TMEDA})_2\text{Zn}_2(\text{OCHO})_3][\text{B}(3,5\text{-}(\text{CF}_3)_2\text{-C}_6\text{H}_3)_4]$  (**6a**) in  $[\text{D}_8]\text{THF}$ .

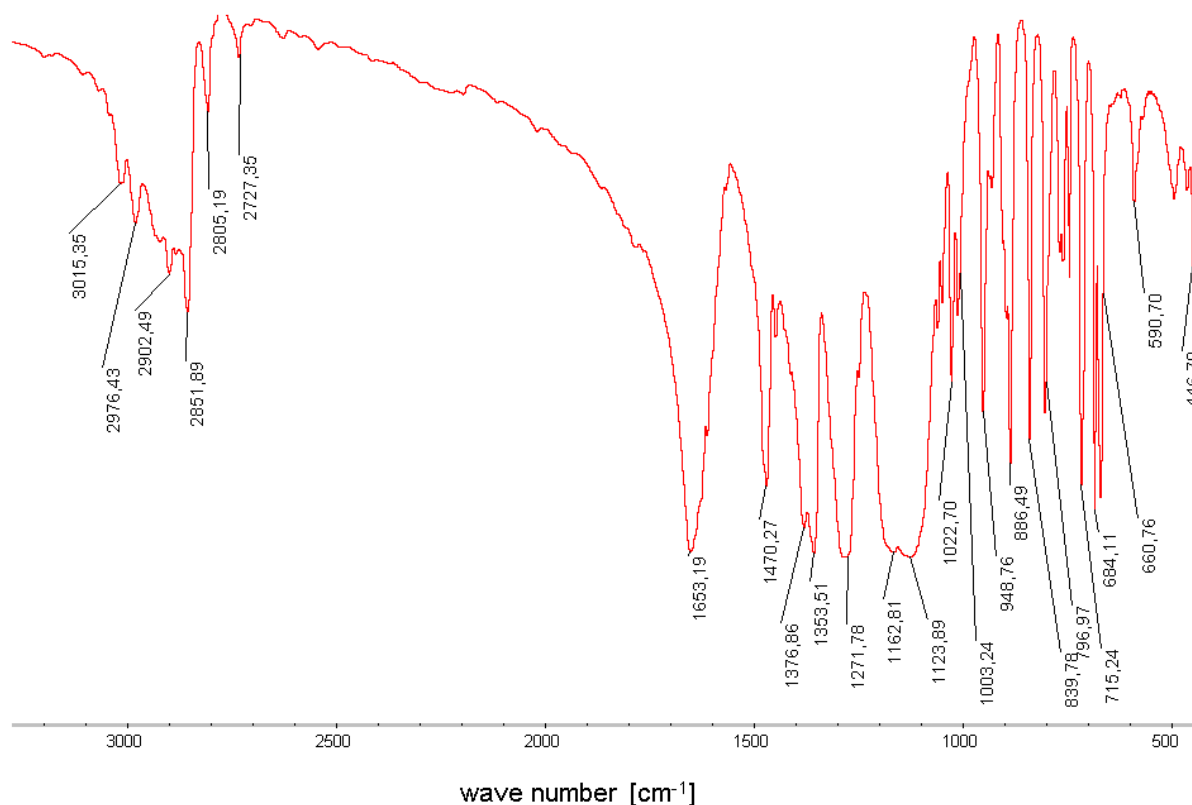

**Figure S73:** IR spectrum (KBr pellet) of  $[(\text{TMEDA})_2\text{Zn}_2(\text{OCHO})_3][\text{B}(3,5\text{-(CF}_3)_2\text{-C}_6\text{H}_3)_4]$  (**6a**).

### Synthesis of $[(\text{TEEDA})_2\text{Zn}_2(\text{OCHO})_3][\text{B}(3,5\text{-(CF}_3)_2\text{-C}_6\text{H}_3)_4]$ (**6b**).

A solution of  $[(\text{TEEDA})_2\text{Zn}_2\text{H}_3][\text{B}(3,5\text{-(CF}_3)_2\text{-C}_6\text{H}_3)_4]$  (200 mg, 149  $\mu\text{mol}$ ) in THF (1 mL) was transferred into a Schlenk tube, degassed by three cycles of “freeze-pump-thaw” and pressurized with  $\text{CO}_2$  (1 bar). The reaction mixture was layered with *n*-pentane and placed in the freezer at  $-30\text{ }^\circ\text{C}$ . After standing overnight crystals formed which were isolated by decantation of the mother liquor and subsequent drying *in vacuo*. to give  $[(\text{TEEDA})_2\text{Zn}_2(\text{OCHO})_3][\text{B}(3,5\text{-(CF}_3)_2\text{-C}_6\text{H}_3)_4]$  as a colorless solid (204 mg, 138  $\mu\text{mol}$ ). Yield: 96 %.

$^1\text{H}$  NMR (400 MHz,  $[\text{D}_8]\text{THF}$ ):  $\delta$  = 1.11 (t,  $^3J_{\text{H-H}} = 7.1\text{ Hz}$ , N- $\text{CH}_2\text{CH}_3$ , 24H), 2.97 (m, N- $\text{CH}_2$ , 24H), 7.60 (s, *para*- $\text{C}_6\text{H}_3$ , 4H), 7.81 (s, *ortho*- $\text{C}_6\text{H}_3$ , 8H), 8.30 (s, Zn-OCHO, 3H) ppm.

$^{13}\text{C}\{^1\text{H}\}$  NMR (101 MHz,  $[\text{D}_8]\text{THF}$ ):  $\delta$  = 8.84 (N- $\text{CH}_2\text{CH}_3$ ), 46.94 (N- $\text{CH}_2\text{CH}_3$ ), 50.97 (N- $\text{CH}_2\text{CH}_2$ ), 118.28 (*para*- $\text{C}_6\text{H}_3$ ), 125.62 (q,  $^1J_{\text{C-F}} = 272.2\text{ Hz}$ ,  $\text{CF}_3$ ), 130.13 (qq,  $^2J_{\text{C-F}} = 31.5\text{ Hz}$ ,  $^3J_{\text{C-B}} = 2.8\text{ Hz}$ , *meta*- $\text{C}_6\text{H}_3$ ), 135.70 (*ortho*- $\text{C}_6\text{H}_3$ ), 162.90 (q,  $^1J_{\text{B-C}} = 49.8\text{ Hz}$ , *ipso*- $\text{C}_6\text{H}_3$ ), 171.45 (Zn-OCHO) ppm.

$^{11}\text{B}\{^1\text{H}\}$  NMR (128 MHz,  $[\text{D}_8]\text{THF}$ ):  $\delta$  = -6.48 ppm.

$^{19}\text{F}\{^1\text{H}\}$  NMR (377 MHz,  $[\text{D}_8]\text{THF}$ ):  $\delta$  = -63.38 ppm.

IR (KBr):  $\nu = 1594 \text{ cm}^{-1}$  (s, ZnH).

Anal. Calcd. for  $\text{C}_{55}\text{H}_{63}\text{BF}_{24}\text{N}_4\text{O}_6\text{Zn}_3$  ( $1473.66 \text{ g} \cdot \text{mol}^{-1}$ ): C, 44.83; H, 4.13; N 3.80. Found: C, 44.73; H, 4.27; N, 3.78%.

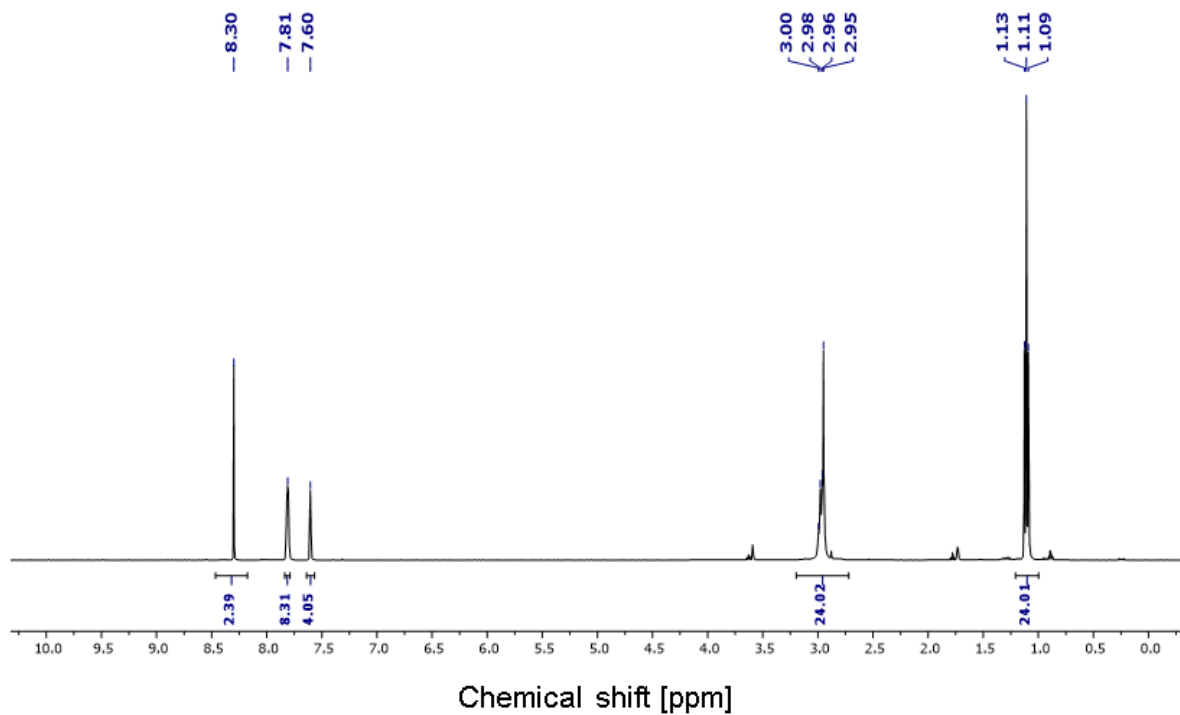

Figure S74:  $^1\text{H}$  NMR spectrum of  $[(\text{TEEDA})_2\text{Zn}_2(\text{OCHO})_3][\text{B}(3,5\text{-(CF}_3)_2\text{-C}_6\text{H}_3)_4]$  (**6b**) in  $[\text{D}_8]\text{THF}$ .

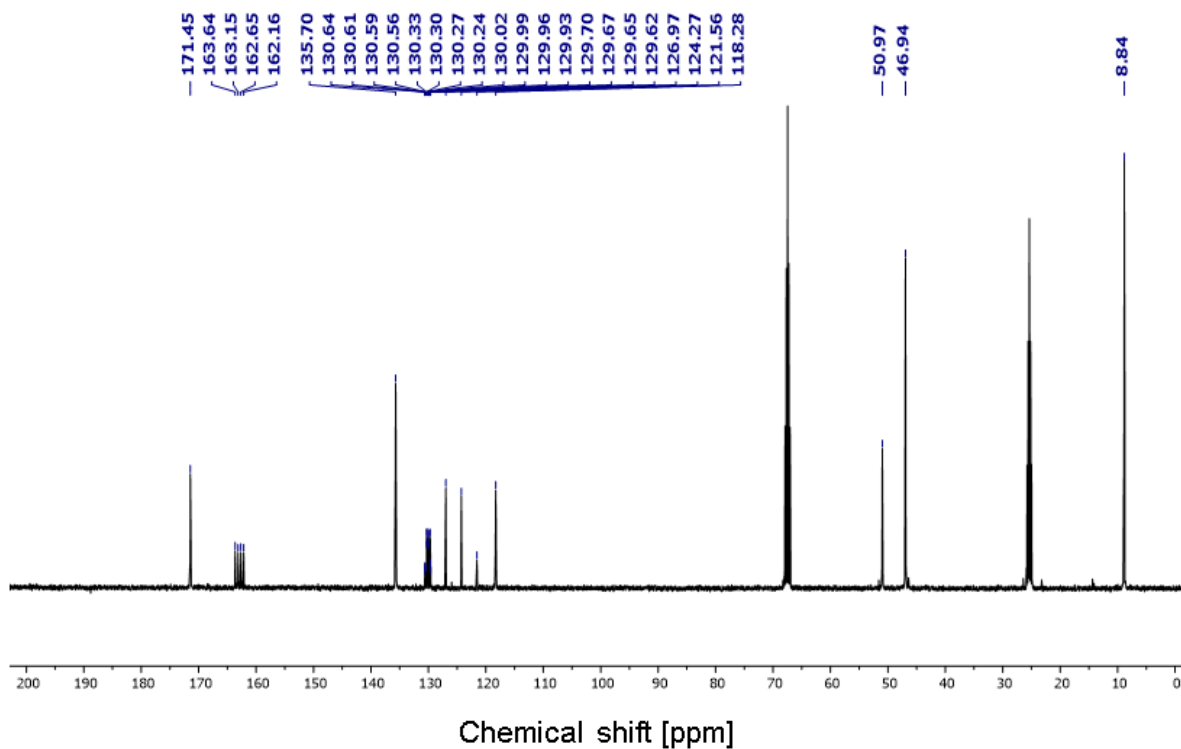

Figure S75:  $^{13}\text{C}\{^1\text{H}\}$  NMR spectrum of  $[(\text{TEEDA})_2\text{Zn}_2(\text{OCHO})_3][\text{B}(3,5\text{-(CF}_3)_2\text{-C}_6\text{H}_3)_4]$  (**6b**) in  $[\text{D}_8]\text{THF}$ .

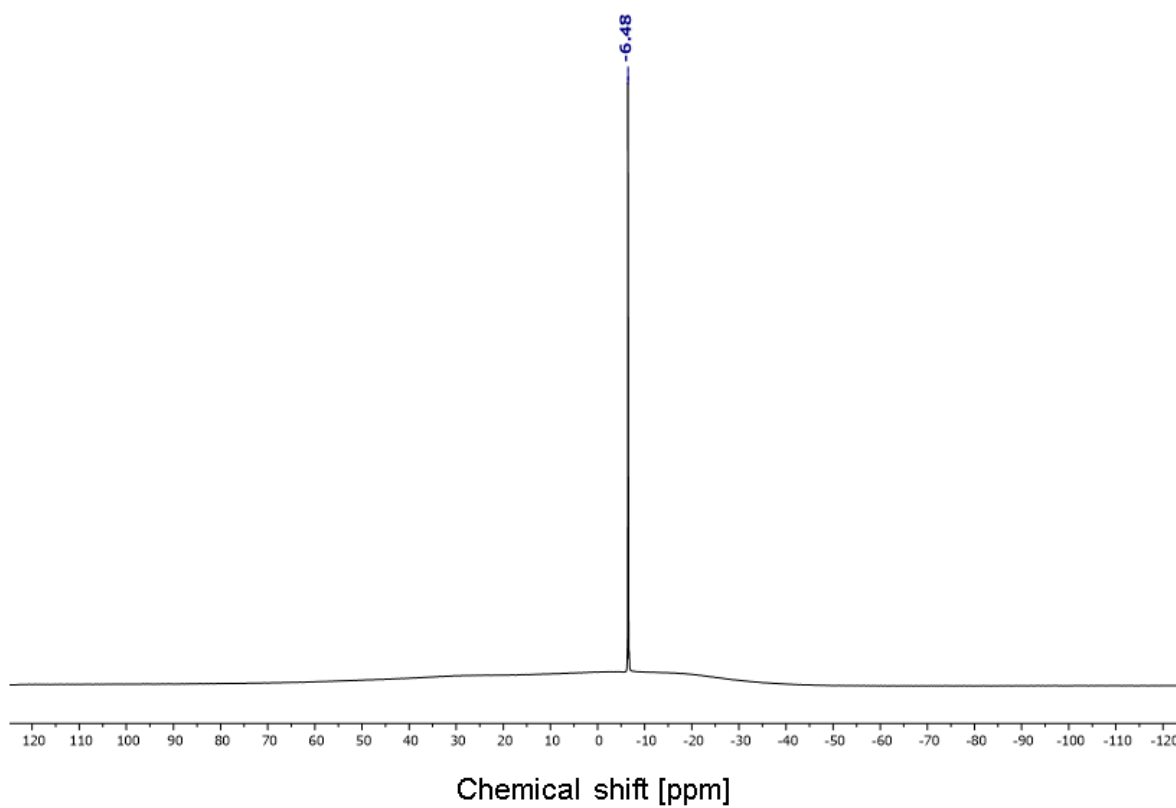

**Figure S76:**  $^{11}\text{B}\{^1\text{H}\}$  NMR spectrum of  $[(\text{TEEDA})_2\text{Zn}_2(\text{OCHO})_3][\text{B}(3,5\text{-(CF}_3)_2\text{-C}_6\text{H}_3)_4]$  (**6b**) in  $[\text{D}_8]\text{THF}$ .

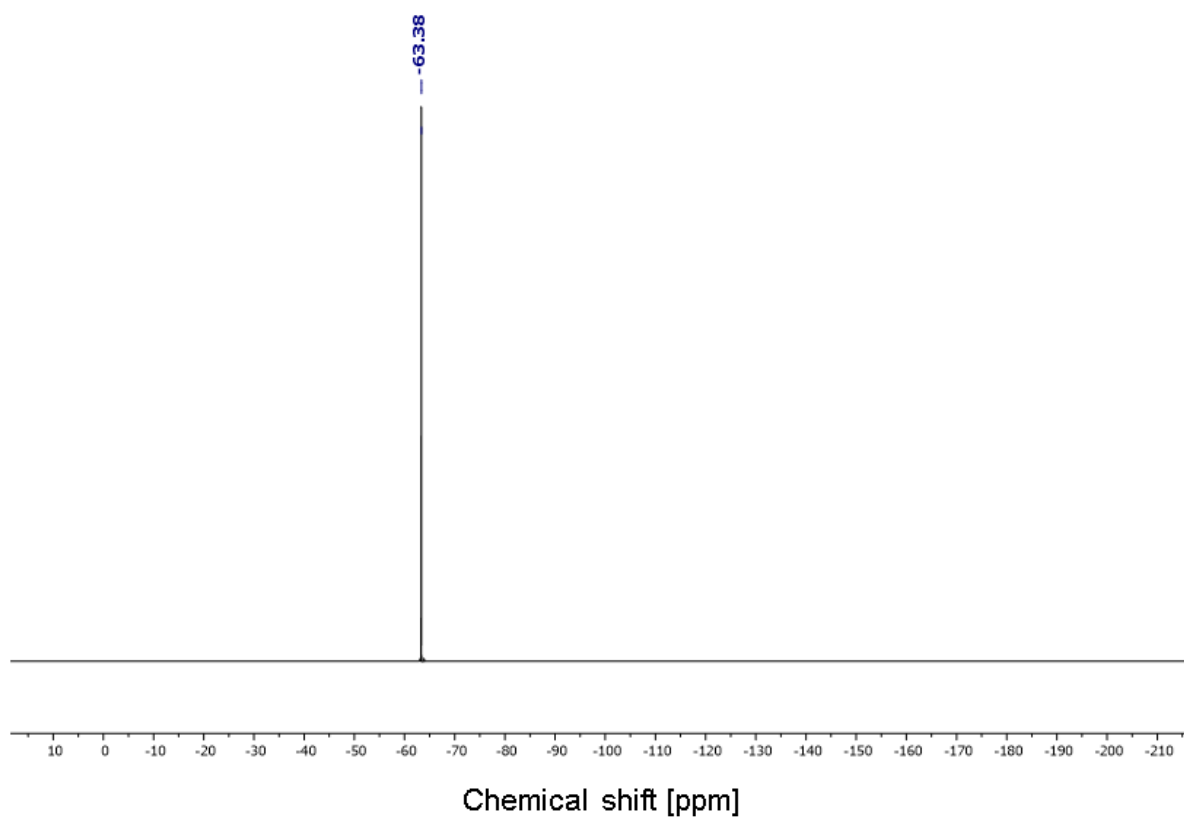

**Figure S77:**  $^{19}\text{F}\{^1\text{H}\}$  NMR spectrum of  $[(\text{TEEDA})_2\text{Zn}_2(\text{OCHO})_3][\text{B}(3,5\text{-(CF}_3)_2\text{-C}_6\text{H}_3)_4]$  (**6b**) in  $[\text{D}_8]\text{THF}$ .

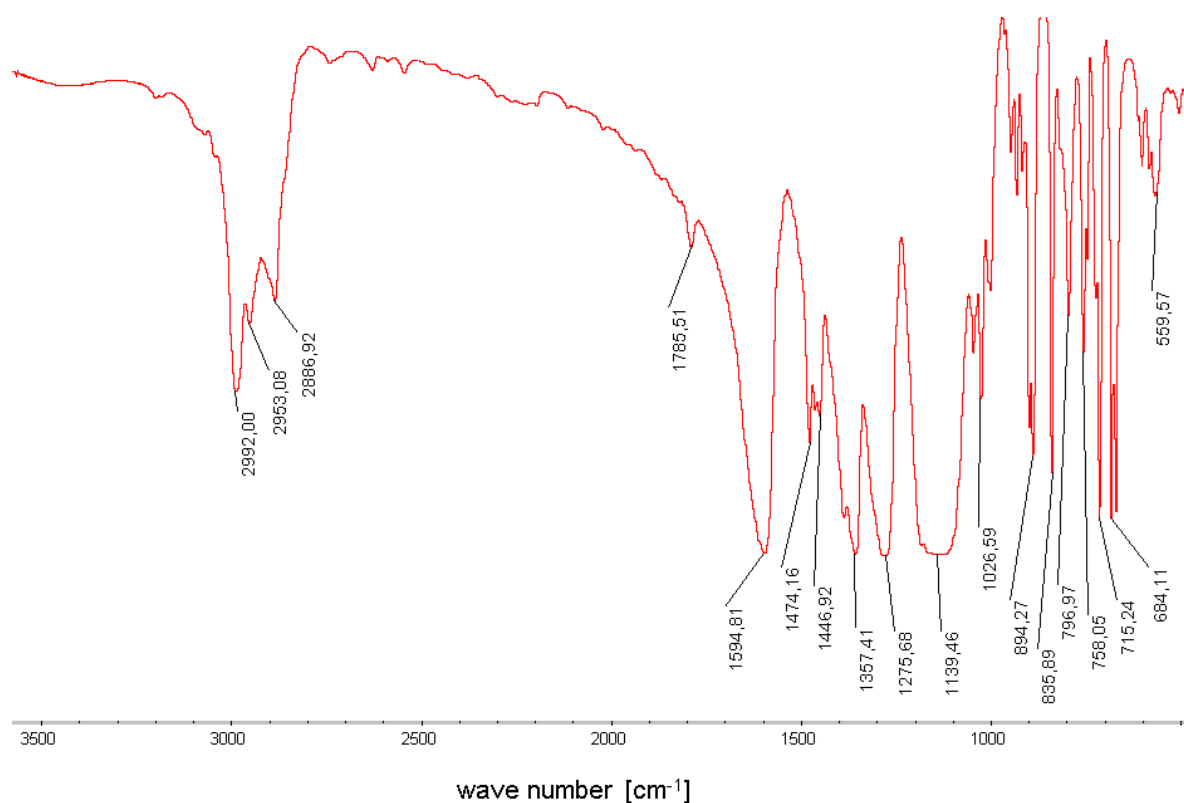

**Figure S78:** IR spectrum (KBr pellet) of  $[(\text{TEEDA})_2\text{Zn}_2(\text{OCHO})_3][\text{B}(3,5\text{-(CF}_3)_2\text{-C}_6\text{H}_3)_4]$  (**6b**).

### Synthesis of $[(\text{TMEDA})\text{Zn}(\text{OCHO})_2]$ (**7a**).

**Method A:** A solution of  $[(\text{TMEDA})_3\text{Zn}_3\text{H}_4][\text{B}(3,5\text{-(CF}_3)_2\text{-C}_6\text{H}_3)_4]_2$  (200 mg, 88  $\mu\text{mol}$ ) in THF (1 mL) was transferred into a Schlenk tube, degassed by three cycles of “freeze-pump-thaw” and pressurized with  $\text{CO}_2$  (1 bar). The solvent was removed in vacuo and the residue was extracted with benzene (3 x 3 mL). The solvent was removed in vacuo and the residue was extracted with diethyl ether (3 x 3 mL) to separate the title compound  $[(\text{TMEDA})\text{Zn}(\text{OCHO})_2][\text{B}(3,5\text{-(CF}_3)_2\text{-C}_6\text{H}_3)_4]_2$  from **5a**. The combined ethereal extracts were filtered and the solvent removed *in vacuo*. Repeated recrystallization and drying under reduced pressure gave  $[(\text{TMEDA})_2\text{Zn}(\text{OCHO})_2]$  as a solid (19 mg, 70  $\mu\text{mol}$ ). Yield: 80 % (based on the maximum theoretical yield).

**Method B:** A suspension of  $[\text{ZnH}_2]_n$  (20 mg, 296  $\mu\text{mol}$ ) and TMEDA (35 mg, 296  $\mu\text{mol}$ ) in  $\text{CH}_2\text{CH}_2$  (2 mL) was transferred into a Schlenk tube equipped with a stir bar, degassed by three cycles of “freeze-pump-thaw” and pressurized with  $\text{CO}_2$  (1 bar). The suspension was stirred at room temperature until all solid material had dissolved (approximately 20 min). The solvent was removed *in vacuo* to give  $[(\text{TEEDA})\text{Zn}(\text{OCHO})_2]$  as a colorless solid (79 mg, 290  $\mu\text{mol}$ ). Yield: 98 %.

$^1\text{H}$  NMR (400 MHz,  $\text{CD}_2\text{Cl}_2$ ):  $\delta$  = 2.53 (s, N- $\text{CH}_3$ , 12H), 2.73 (s, N- $\text{CH}_2$ , 4H), 8.29 (s, Zn-OCHO, 2H) ppm.

$^{13}\text{C}\{^1\text{H}\}$  NMR (101 MHz,  $\text{CD}_2\text{Cl}_2$ ):  $\delta$  = 47.12 (N- $\text{CH}_3$ ), 57.27 (N- $\text{CH}_2$ ), 169.70 (Zn-OCHO) ppm.

IR (KBr):  $\nu$  = 1608  $\text{cm}^{-1}$  (s, ZnOCHO).

Anal. Calcd. for  $\text{C}_8\text{H}_{18}\text{N}_2\text{O}_4\text{Zn}$  (271.62  $\text{g} \cdot \text{mol}^{-1}$ ): C, 35.38; H, 6.68; N 10.31. Found: C, 35.11; H, 6.60; N, 10.45%.

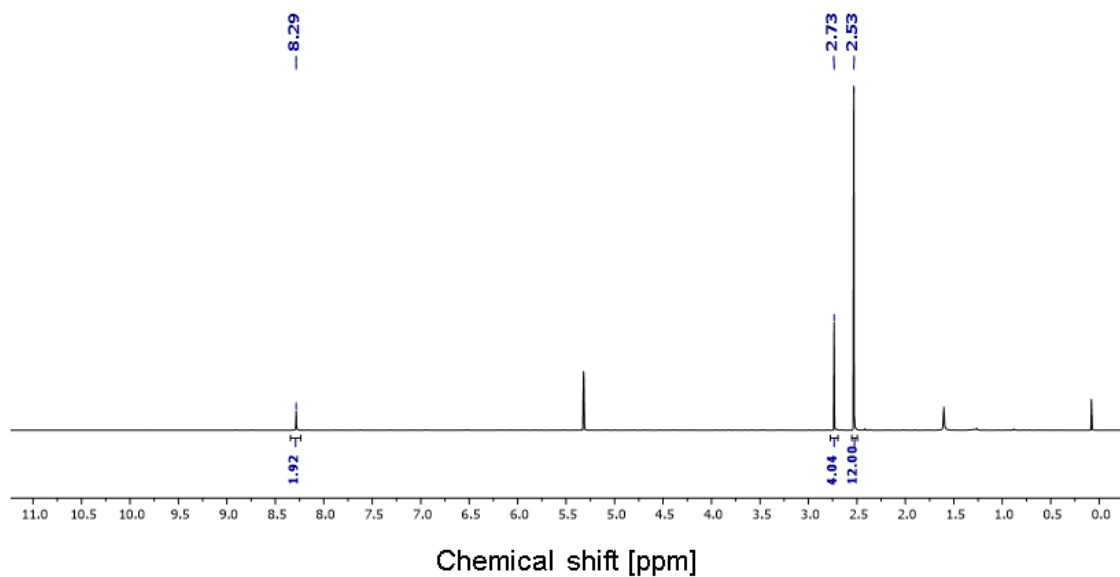

**Figure S79:**  $^1\text{H}$  NMR spectrum of  $[(\text{TMEDA})\text{Zn}(\text{OCHO})_2]$  (**7a**) in  $\text{CD}_2\text{Cl}_2$ .

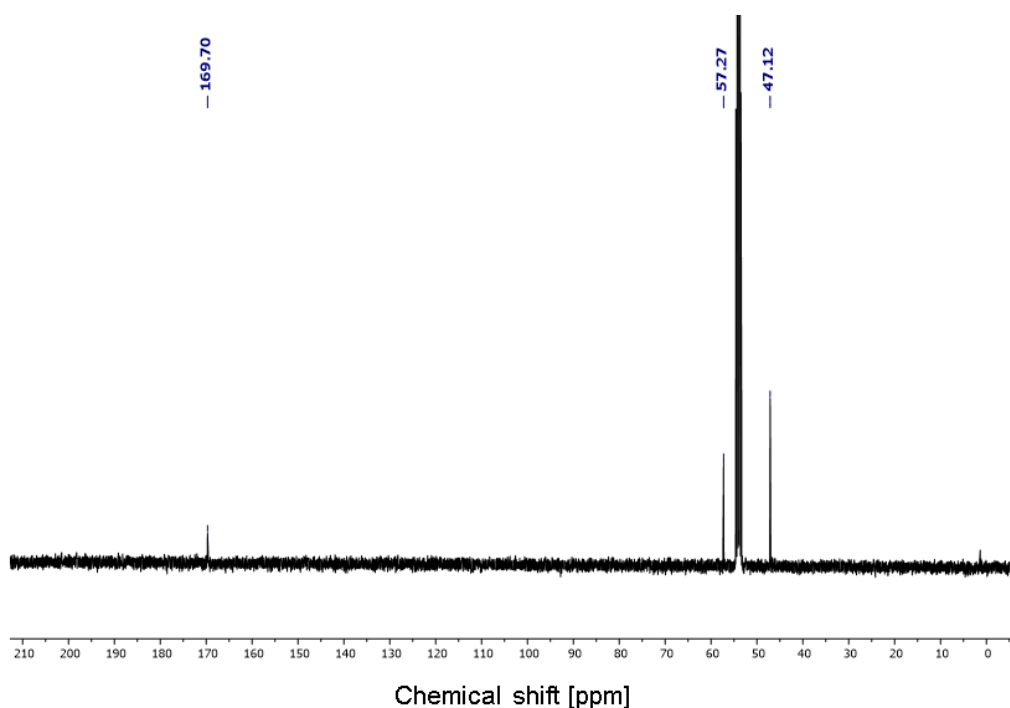

**Figure S80:**  $^{13}\text{C}\{^1\text{H}\}$  NMR spectrum of  $[(\text{TMEDA})\text{Zn}(\text{OCHO})_2]$  (**7a**) in  $\text{CD}_2\text{Cl}_2$ .

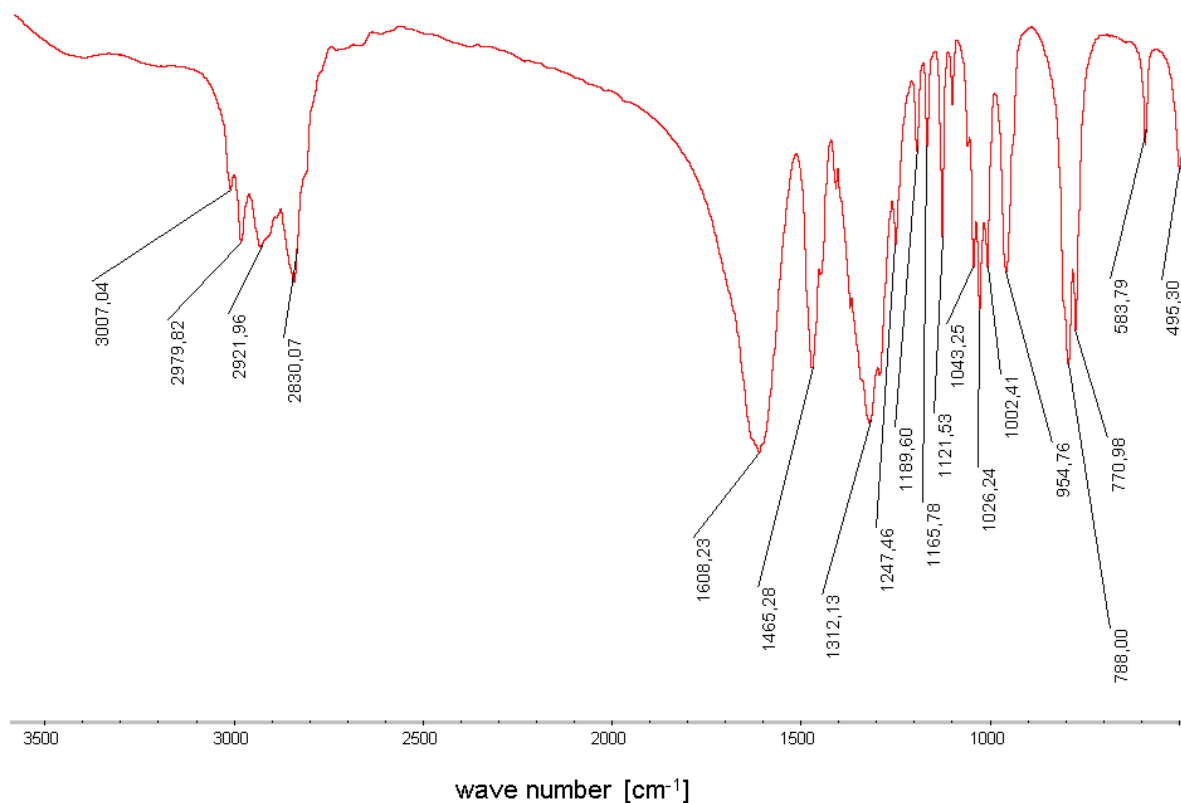

**Figure S81:** IR spectrum (KBr pellet) of [(TMEDA)Zn(OCHO)<sub>2</sub>] (**7a**).

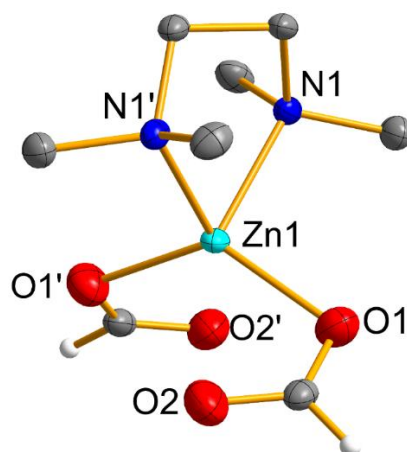

Molecular structure of **7a**. Displacement parameters atoms are set at 50% probability level. The hydrogen atoms except of the formate hydrogen atoms are omitted for clarity. Selected bond distances [Å] and angles [°]: Zn1-O1 1.986(3), Zn1-N1 2.101(4), N1-Zn1-O1 102.89(14), N1'-Zn1-O1 113.13(15).<sup>[S5]</sup>

### Synthesis of [(TEEDA)Zn(OCHO)<sub>2</sub>] (**7b**).

A solution of [(TEEDA)<sub>3</sub>Zn<sub>3</sub>H<sub>4</sub>][B(3,5-(CF<sub>3</sub>)<sub>2</sub>-C<sub>6</sub>H<sub>3</sub>)<sub>4</sub>]<sub>2</sub> (200 mg, 82 μmol) in THF (1 mL) was transferred into a Schlenk tube, degassed by three cycles of “freeze-pump-thaw” and



pressurized with CO<sub>2</sub> (1 bar). The solvent was removed in vacuo and the residue was extracted with diethyl ether (3 x 3 mL) to separate the title compound [(TEEDA)Zn(OCHO)]<sub>2</sub>[B(3,5-(CF<sub>3</sub>)<sub>2</sub>-C<sub>6</sub>H<sub>3</sub>)<sub>4</sub>]<sub>2</sub> from **5b**. The combined ethereal extracts were filtered and the solvent removed in vacuo. Repeated recrystallization and drying under reduced pressure gave [(TEEDA)<sub>2</sub>Zn(OCHO)<sub>2</sub>] as colorless solid (12 mg, 68 μmol). Yield: 83 % (based on the maximum theoretical yield).

**Method B:** A suspension of [ZnH<sub>2</sub>]<sub>n</sub> (20 mg, 296 μmol) and TEEDA (51 mg, 296 μmol) in CH<sub>2</sub>CH<sub>2</sub> (2 mL) was transferred into a Schlenk tube equipped with a stir bar, degassed by three cycles of “freeze-pump-thaw” and pressurized with CO<sub>2</sub> (1 bar). The suspension was stirred at room temperature until all solid material had dissolved (approximately 20 min). The solvent was removed *in vacuo* to give [(TEEDA)Zn(OCHO)<sub>2</sub>] as a colorless solid (94 mg, 287 μmol). Yield: 98 %.

<sup>1</sup>H NMR (400 MHz, CD<sub>2</sub>Cl<sub>2</sub>): δ = 1.08 (t, <sup>3</sup>J<sub>H-H</sub> = 7.1 Hz, N-CH<sub>2</sub>CH<sub>3</sub>, 12H), 2.79 (m, N-CH<sub>2</sub>CH<sub>3</sub>, 4H), 2.87 (s, N-CH<sub>2</sub>, 4H), 3.17 (m, N-CH<sub>2</sub>CH<sub>3</sub>, 4H), 8.31 (s, Zn-OCHO, 2H) ppm.

<sup>13</sup>C{<sup>1</sup>H} NMR (101 MHz, CD<sub>2</sub>Cl<sub>2</sub>): δ = 8.78 (N-CH<sub>2</sub>CH<sub>3</sub>), 46.18 (N-CH<sub>2</sub>CH<sub>3</sub>), 51.02 (N-CH<sub>2</sub>CH<sub>2</sub>), 168.48 (Zn-OCHO) ppm.

IR (KBr): ν = 1633 cm<sup>-1</sup> (s, ZnOCHO).

Anal. Calcd. for C<sub>12</sub>H<sub>26</sub>N<sub>2</sub>O<sub>4</sub>Zn (327.73 g · mol<sup>-1</sup>): C, 43.98; H, 8.00; N 8.55. Found: C, 42.84; H, 7.68; N, 8.60%.

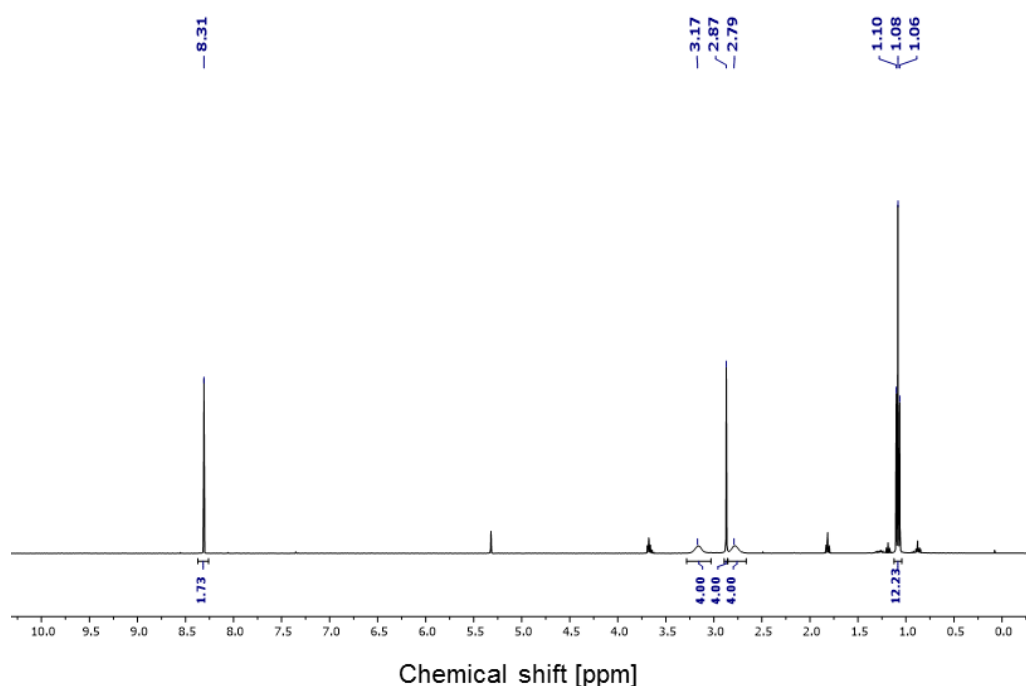

**Figure S82:** <sup>1</sup>H NMR spectrum of [(TEEDA)Zn(OCHO)<sub>2</sub>] (**7b**) in CD<sub>2</sub>Cl<sub>2</sub>.

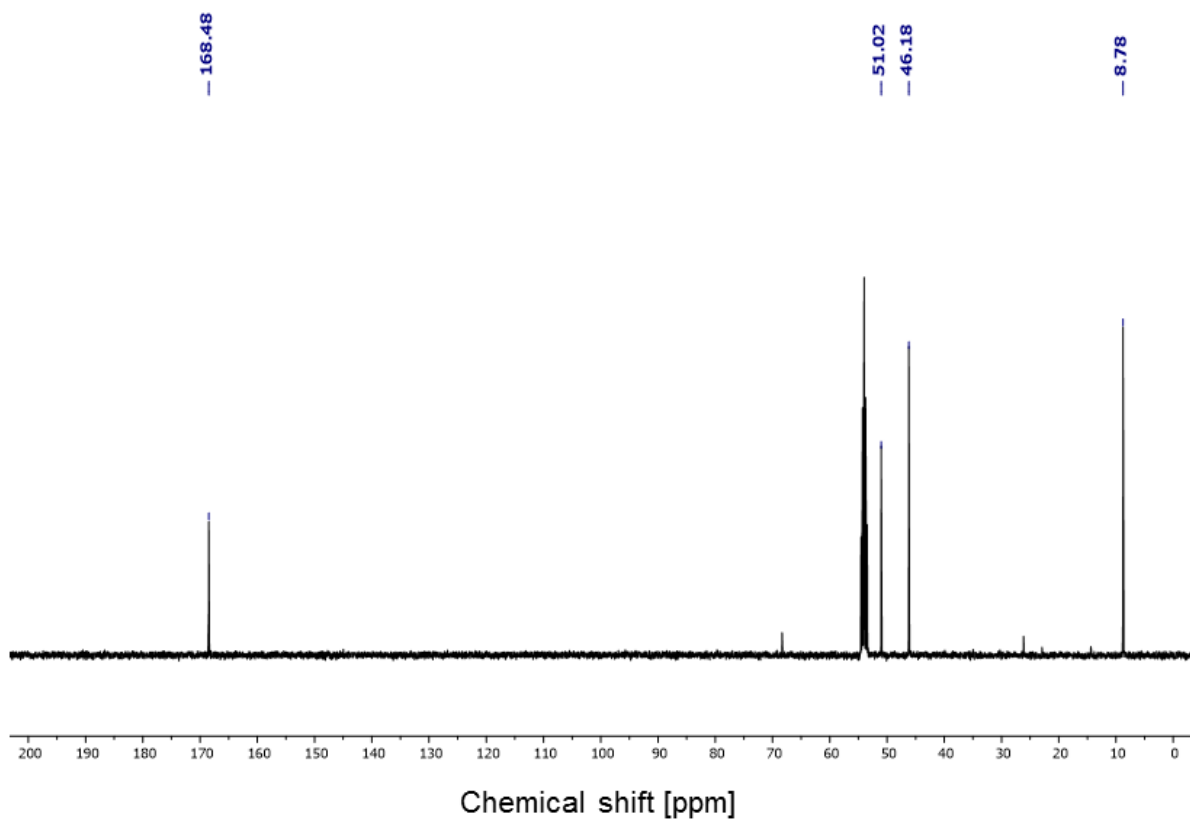

**Figure S83:**  $^{13}\text{C}\{^1\text{H}\}$  NMR spectrum of  $[(\text{TEEDA})\text{Zn}(\text{OCHO})_2]$  (**7b**) in  $\text{CD}_2\text{Cl}_2$ .

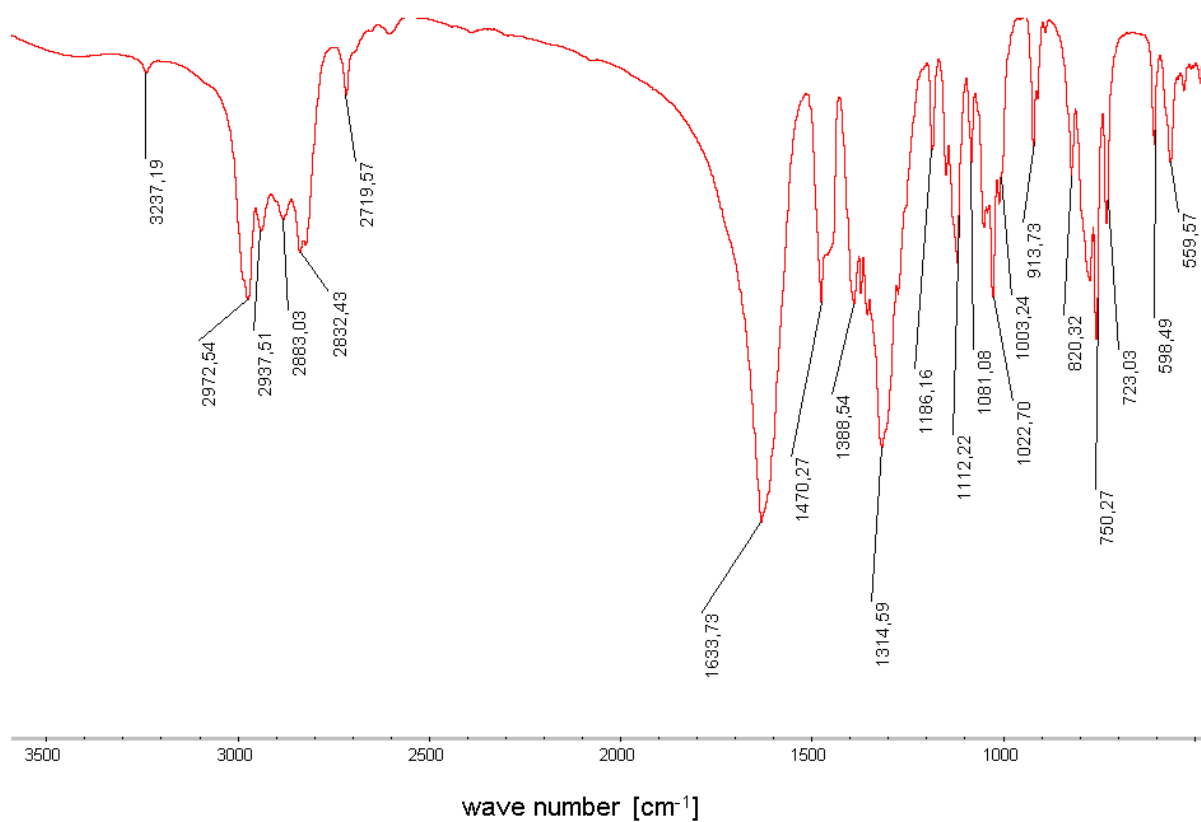

**Figure S84:** IR spectrum (KBr pellet) of  $[(\text{TEEDA})\text{Zn}(\text{OCHO})_2]$  (**7b**).

## Synthesis of silanes

### Synthesis of ${}^n\text{BuMe}_2\text{SiH}$ <sup>[S6]</sup>

To a suspension of  $\text{LiAlH}_4$  (302 mg, 7.9 mmol) tetraglyme was added dropwise  ${}^n\text{BuMe}_2\text{SiCl}$  (1000 mg, 6.6 mmol) and stirred over night at roomtemperature. The title compound was distilled directly from the reaction mixture under reduced pressure as a colorless liquid. Yield: 740 mg, 6.4 mmol, 96%.

${}^1\text{H}$  NMR (400 MHz,  $\text{CDCl}_3$ ):  $\delta$  = 0.06 (d,  $J_{\text{H-H}} = 3.7$  Hz, 6H, Si- $\text{CH}_3$ ), 0.44 – 0.63 (m, 2H, Si- $\text{CH}_2\text{CH}_2\text{CH}_2\text{CH}_3$ ), 0.89 (t,  $J_{\text{H-H}} = 7.0$  Hz, 3H, Si- $\text{CH}_2\text{CH}_2\text{CH}_2\text{CH}_3$ ), 1.18 – 1.44 (m, 6H, Si- $\text{CH}_2\text{CH}_2\text{CH}_2\text{CH}_3$ ), 3.84 (hept,  $J = 3.6$  Hz, 1H, Si- $\text{H}$ ) ppm.

${}^{13}\text{C}\{{}^1\text{H}\}$  NMR (101 MHz,  $\text{CDCl}_3$ ):  $\delta$  = -4.28 (Si- $\text{CH}_3$ ), 13.96 (Si- $\text{CH}_2\text{CH}_2\text{CH}_2\text{CH}_3$ ), 14.02 (Si- $\text{CH}_2\text{CH}_2\text{CH}_2\text{CH}_3$ ), 26.33 (Si- $\text{CH}_2\text{CH}_2\text{CH}_2\text{CH}_3$ ), 26.75 (Si- $\text{CH}_2\text{CH}_2\text{CH}_2\text{CH}_3$ ) ppm.

${}^{29}\text{Si}\{{}^1\text{H}\}$  (DEPT 45) NMR (79 MHz,  $\text{CDCl}_3$ ):  $\delta$  = -13.06 ppm.

${}^{29}\text{Si}\{{}^1\text{H}\}$  (inverse gated) NMR (79 MHz,  $\text{CDCl}_3$ ):  $\delta$  = -13.06 ppm.

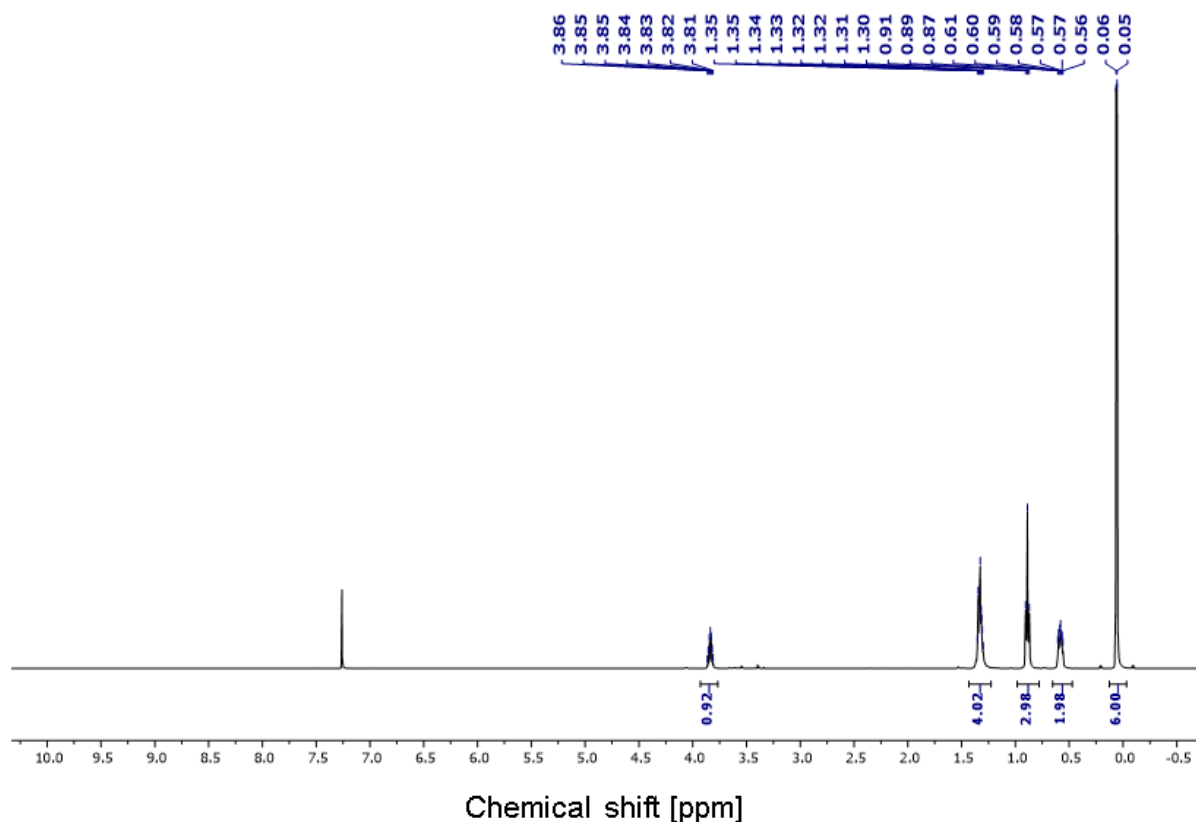

Figure S85:  ${}^1\text{H}$  NMR spectrum of  ${}^n\text{BuMe}_2\text{SiH}$  in  $\text{CDCl}_3$ .

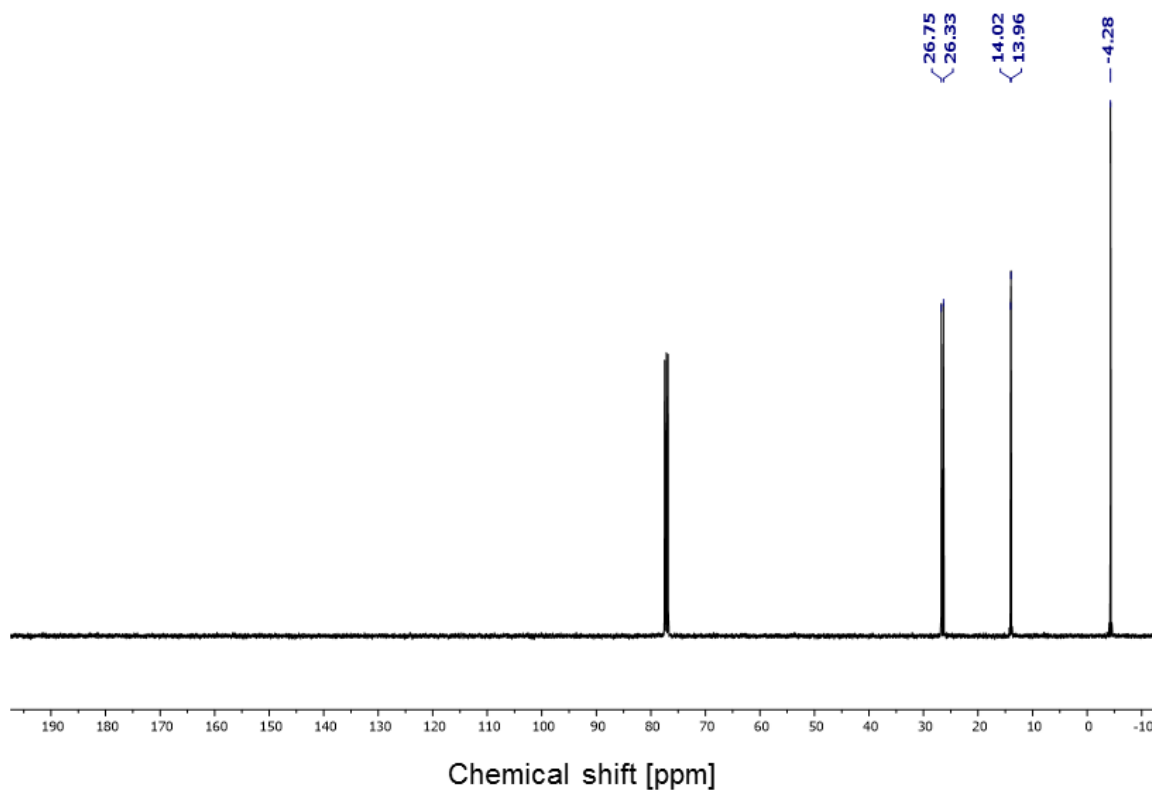

**Figure S86:**  $^{13}\text{C}\{^1\text{H}\}$  NMR spectrum of  $n\text{BuMe}_2\text{SiH}$  in  $\text{CDCl}_3$ .

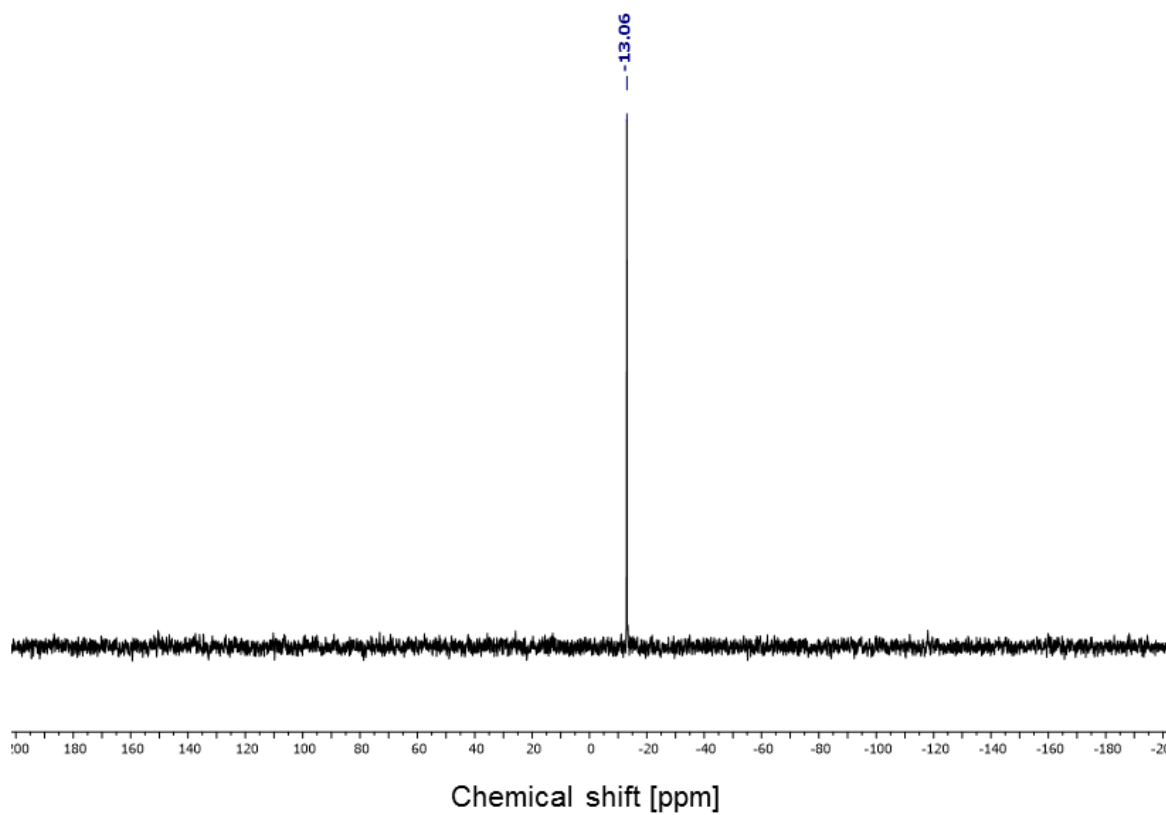

**Figure S87:**  $^{29}\text{Si}\{^1\text{H}\}$  NMR spectrum (DEPT 45) of  $n\text{BuMe}_2\text{SiH}$  in  $\text{CDCl}_3$ .

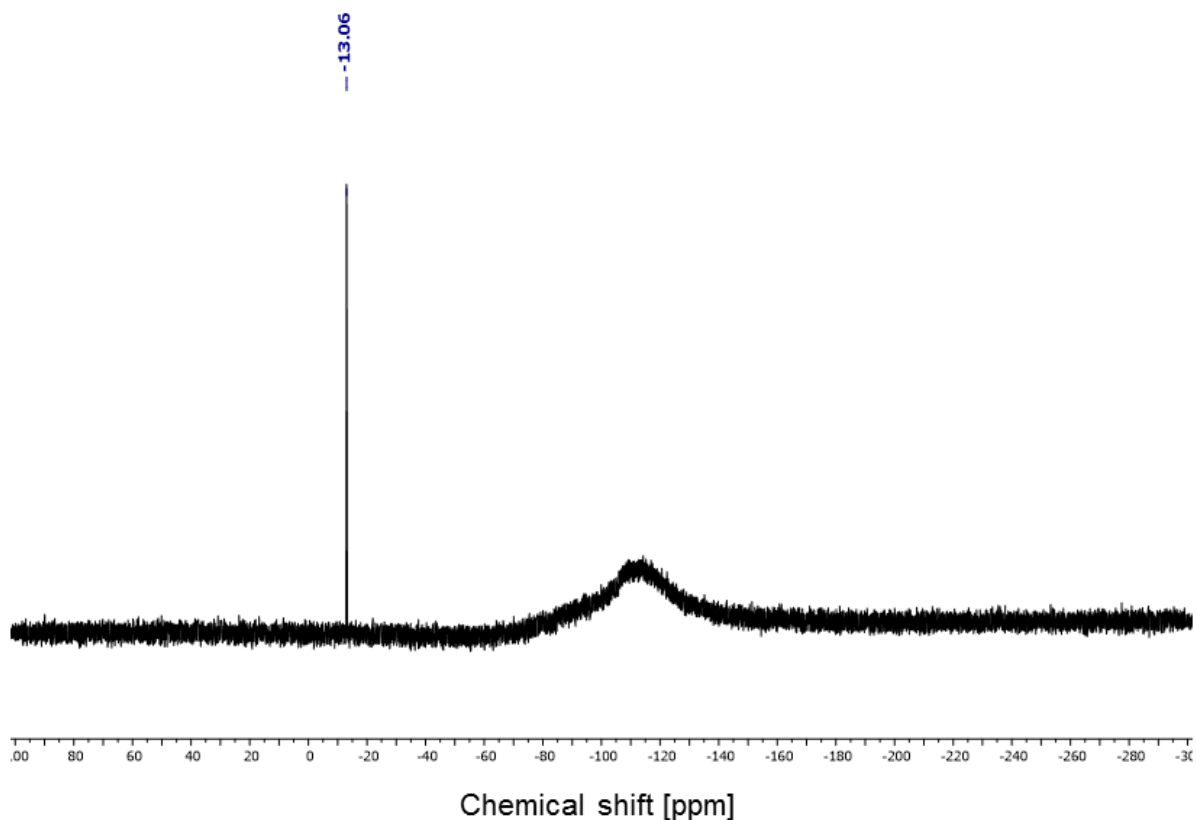

**Figure S88:**  $^{29}\text{Si}\{^1\text{H}\}$  NMR spectrum (inverse gated) of  $n\text{BuMe}_2\text{SiH}$  in  $\text{CDCl}_3$ .

### Synthesis of $n\text{BuMe}_2\text{Si}(\text{OCHO})$ <sup>[S7]</sup>

To  $\text{Na}(\text{OCHO})$  (541 mg, 7.9 mmol) in tetraglyme was added  $n\text{BuMe}_2\text{SiCl}$  (1000 mg, 6.6 mmol) and reaction mixture was stirred for 48 h at  $90^\circ\text{C}$ . The title compound was distilled direct from the reaction mixture as a colorless liquid. Yield: 999 mg, 6.2 mmol, 94%.

$^1\text{H}$  NMR (400 MHz,  $\text{CDCl}_3$ ):  $\delta = 0.30$  (s, 6H, Si- $\text{CH}_3$ ), 0.74 – 0.82 (m, 2H, Si- $\text{CH}_2\text{CH}_2\text{CH}_2\text{CH}_3$ ), 0.85 – 0.95 (m, 3H), 1.28 – 1.42 (m, 4H, Si- $\text{CH}_2\text{CH}_2\text{CH}_2\text{CH}_3$ ), 8.08 (s, 1H, Si- $\text{OCHO}$ ) ppm.

$^{13}\text{C}\{^1\text{H}\}$  NMR (101 MHz,  $\text{CDCl}_3$ ):  $\delta = -1.64$  (Si- $\text{CH}_3$ ), 13.83 (Si- $\text{CH}_2\text{CH}_2\text{CH}_2\text{CH}_3$ ), 15.82 (Si- $\text{CH}_2\text{CH}_2\text{CH}_2\text{CH}_3$ ), 25.01 (Si- $\text{CH}_2\text{CH}_2\text{CH}_2\text{CH}_3$ ), 26.25 (Si- $\text{CH}_2\text{CH}_2\text{CH}_2\text{CH}_3$ ), 161.19 (Si- $\text{OCHO}$ ) ppm.

$^{29}\text{Si}\{^1\text{H}\}$  (DEPT 20) NMR (79 MHz,  $\text{CDCl}_3$ ):  $\delta = 26.19$  ppm.

$^{29}\text{Si}\{^1\text{H}\}$  (inverse gated) NMR (79 MHz,  $\text{CDCl}_3$ ):  $\delta = 26.19$  ppm.

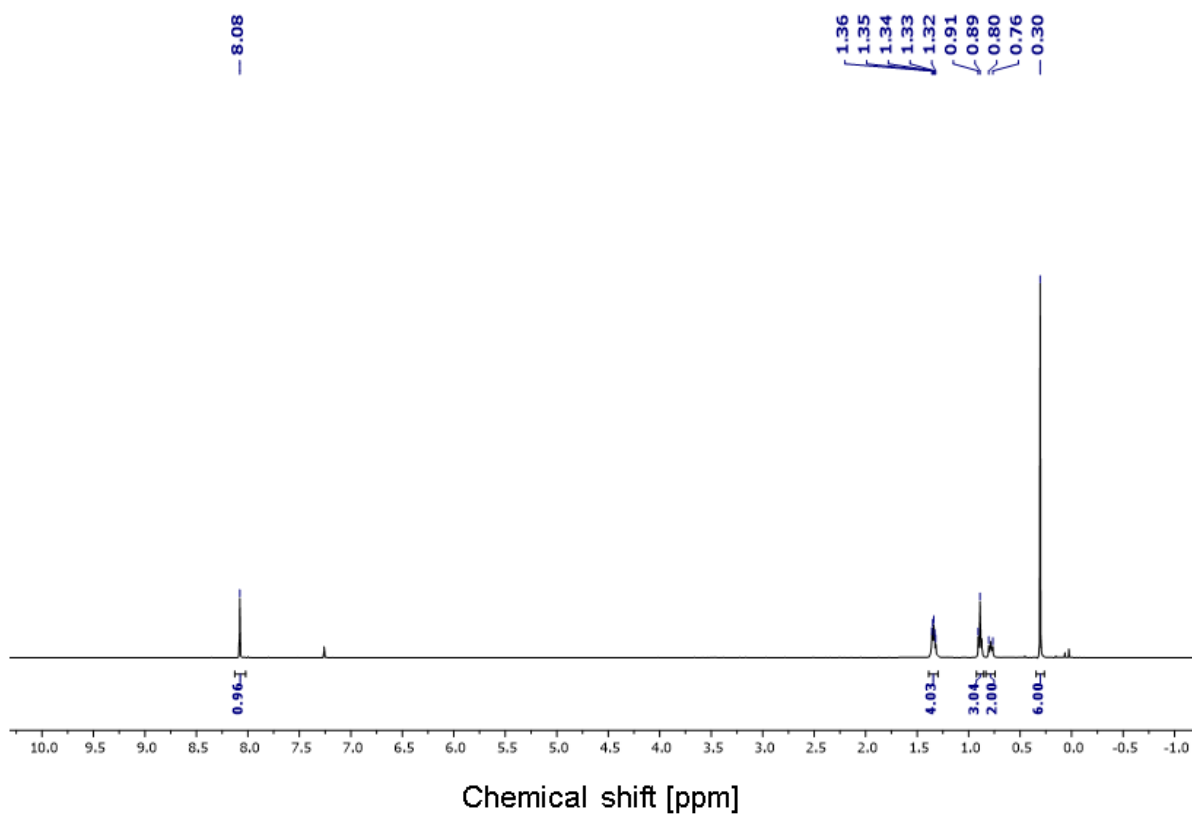

Figure S89:  $^1\text{H}$  NMR spectrum of  $n\text{BuMe}_2\text{Si}(\text{OCHO})$  in  $\text{CDCl}_3$ .

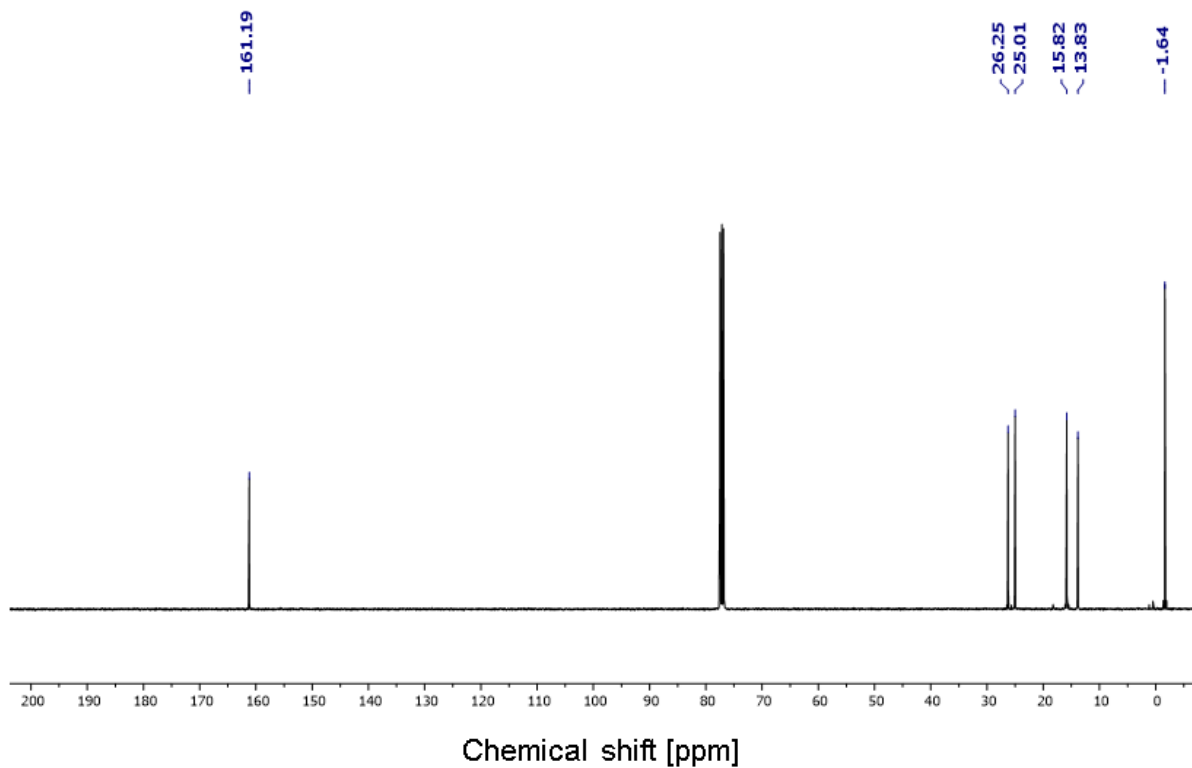

Figure S90:  $^{13}\text{C}\{^1\text{H}\}$  NMR spectrum of  $n\text{BuMe}_2\text{Si}(\text{OCHO})$  in  $\text{CDCl}_3$ .

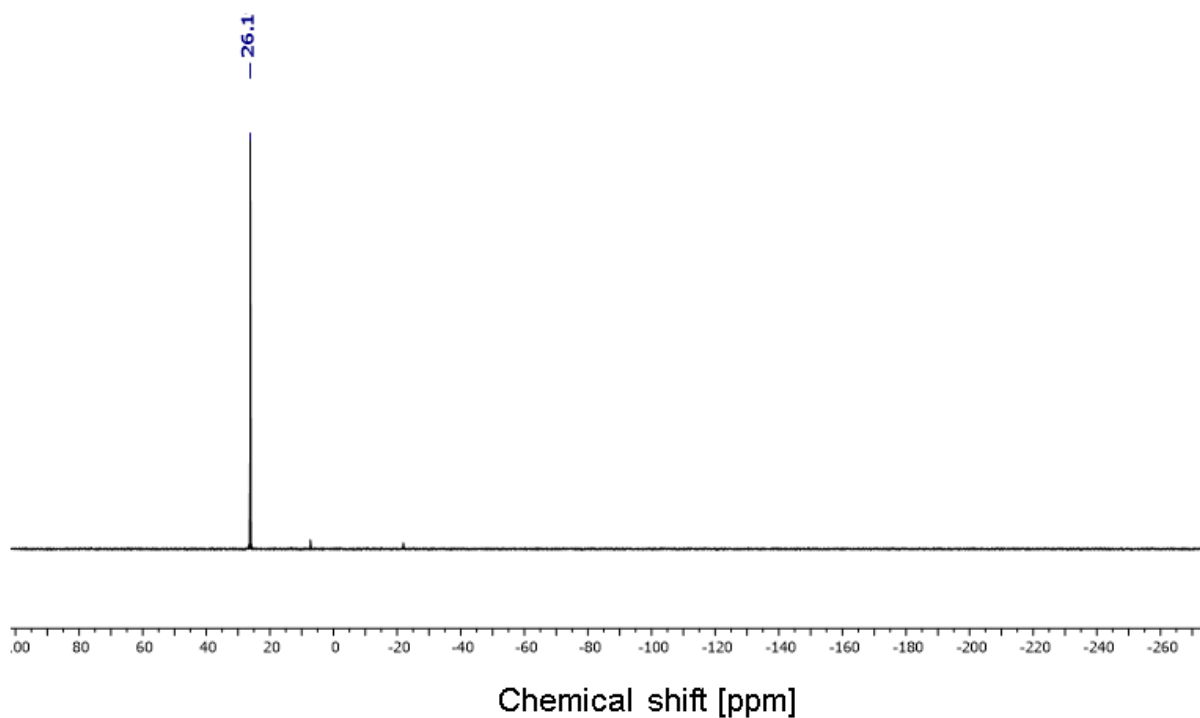

**Figure S91:**  $^{29}\text{Si}\{^1\text{H}\}$  NMR spectrum (DEPT 20) of  $n\text{BuMe}_2\text{Si}(\text{OCHO})$  in  $\text{CDCl}_3$ .

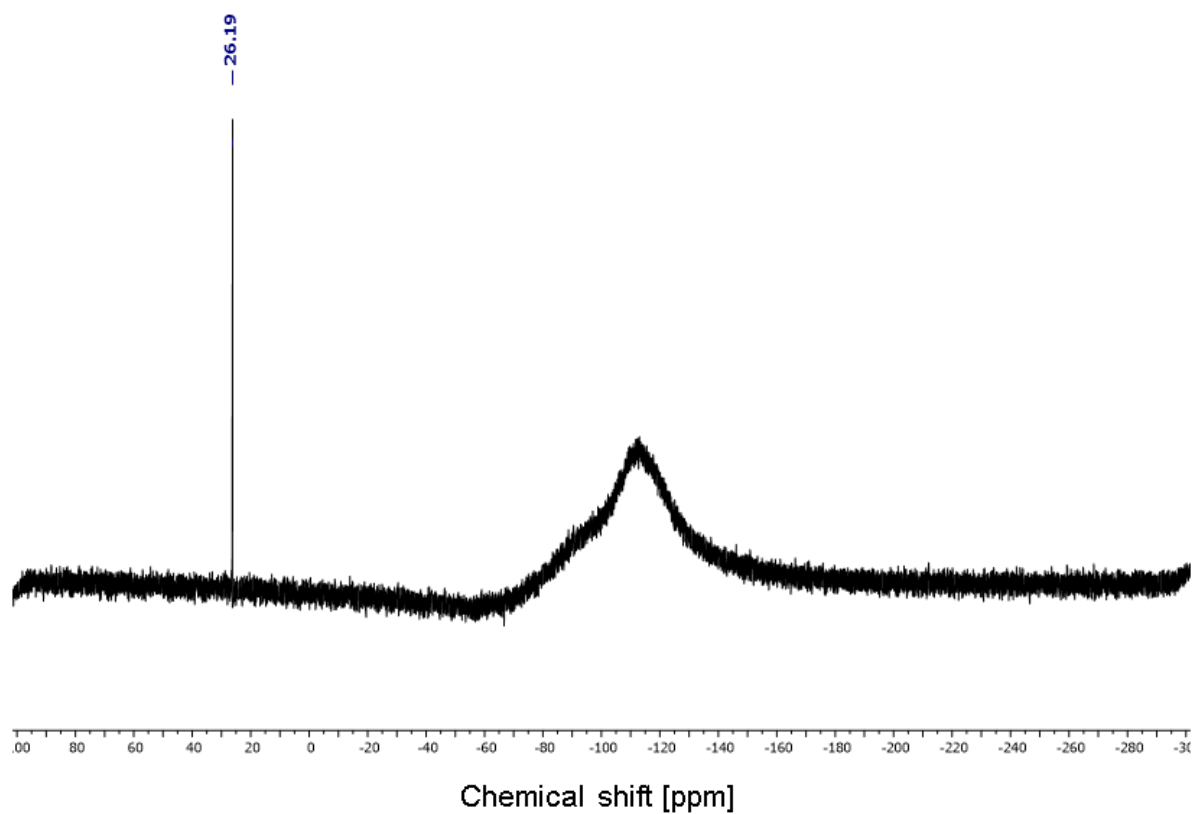

**Figure S92:**  $^{29}\text{Si}\{^1\text{H}\}$  NMR spectrum (inverse gated) of  $n\text{BuMe}_2\text{Si}(\text{OCHO})$  in  $\text{CDCl}_3$ .

### Synthesis of $n\text{BuMe}_2\text{Si}(\text{OCH}_3)$ <sup>[S8]</sup>

To  $\text{NaOCH}_3$  (430 mg, 7.9 mmol) in tetraglyme was added dropwise  $n\text{BuMe}_2\text{SiCl}$  (1000 mg, 6.6 mmol) and stirred for 48 h at  $80^\circ\text{C}$ . The title compound was direct distilled from the reaction mixture as a colorless liquid. Yield: 912 mg, 6.2 mmol, 94%.

$^1\text{H}$  NMR (400 MHz,  $\text{CDCl}_3$ ):  $\delta$  = 0.09 (s, 6H, Si- $\text{CH}_3$ ), 0.54 – 0.65 (m, 2H, Si- $\text{CH}_2\text{CH}_2\text{CH}_2\text{CH}_3$ ), 0.83 – 0.95 (m, 3H, Si- $\text{CH}_2\text{CH}_2\text{CH}_2\text{CH}_3$ ), 1.23 – 1.43 (m, 4H, Si- $\text{CH}_2\text{CH}_2\text{CH}_2\text{CH}_3$ ), 3.42 (s, 3H, Si- $\text{OCH}_3$ ) ppm.

$^{13}\text{C}\{^1\text{H}\}$  NMR (101 MHz,  $\text{CDCl}_3$ ):  $\delta$  = -2.54 (Si- $\text{CH}_3$ ), 13.93 (Si- $\text{CH}_2\text{CH}_2\text{CH}_2\text{CH}_3$ ), 15.73 (Si- $\text{CH}_2\text{CH}_2\text{CH}_2\text{CH}_3$ ), 25.50 (Si- $\text{CH}_2\text{CH}_2\text{CH}_2\text{CH}_3$ ), 26.54 (Si- $\text{CH}_2\text{CH}_2\text{CH}_2\text{CH}_3$ ), 50.41 (Si- $\text{OCH}_3$ ) ppm.

$^{29}\text{Si}\{^1\text{H}\}$  (DEPT 20) NMR (79 MHz,  $\text{CDCl}_3$ ):  $\delta$  = 19.79 ppm.

$^{29}\text{Si}\{^1\text{H}\}$  (inverse gated) NMR (79 MHz,  $\text{CDCl}_3$ ):  $\delta$  = 19.80 ppm.

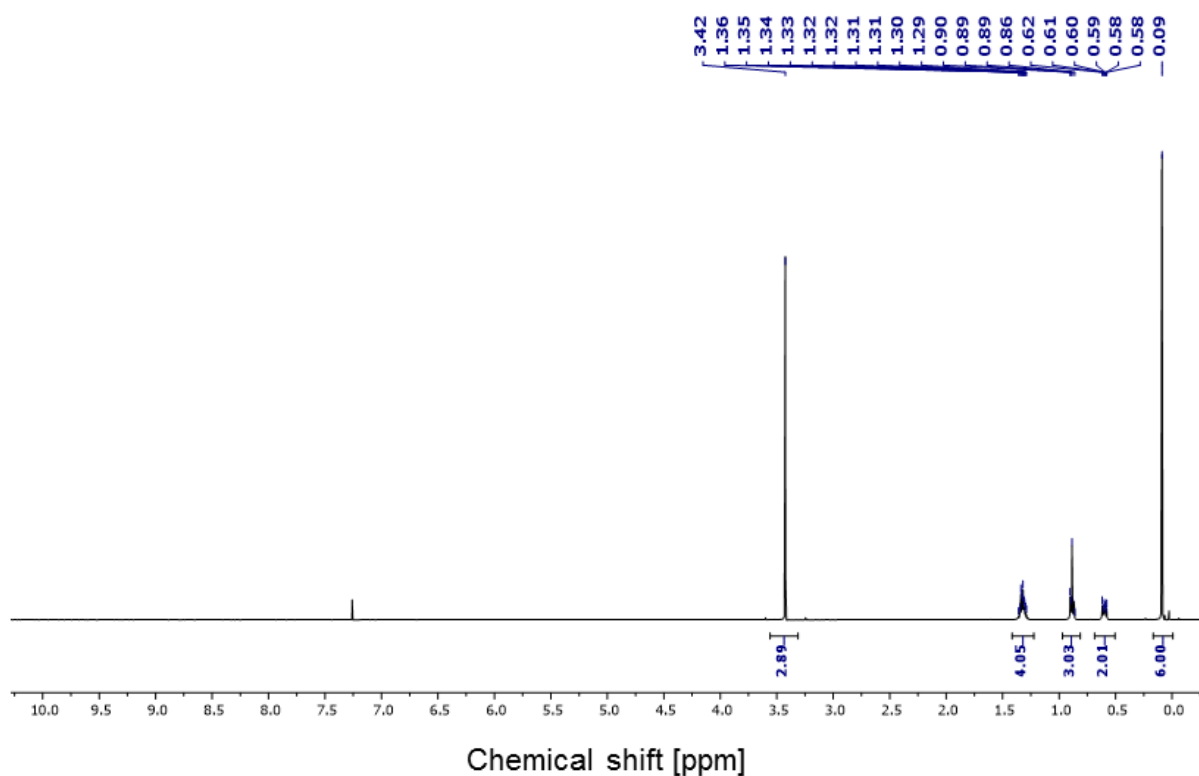

**Figure S93:**  $^1\text{H}$  NMR spectrum of  $n\text{BuMe}_2\text{Si}(\text{OCH}_3)$  in  $\text{CDCl}_3$ .



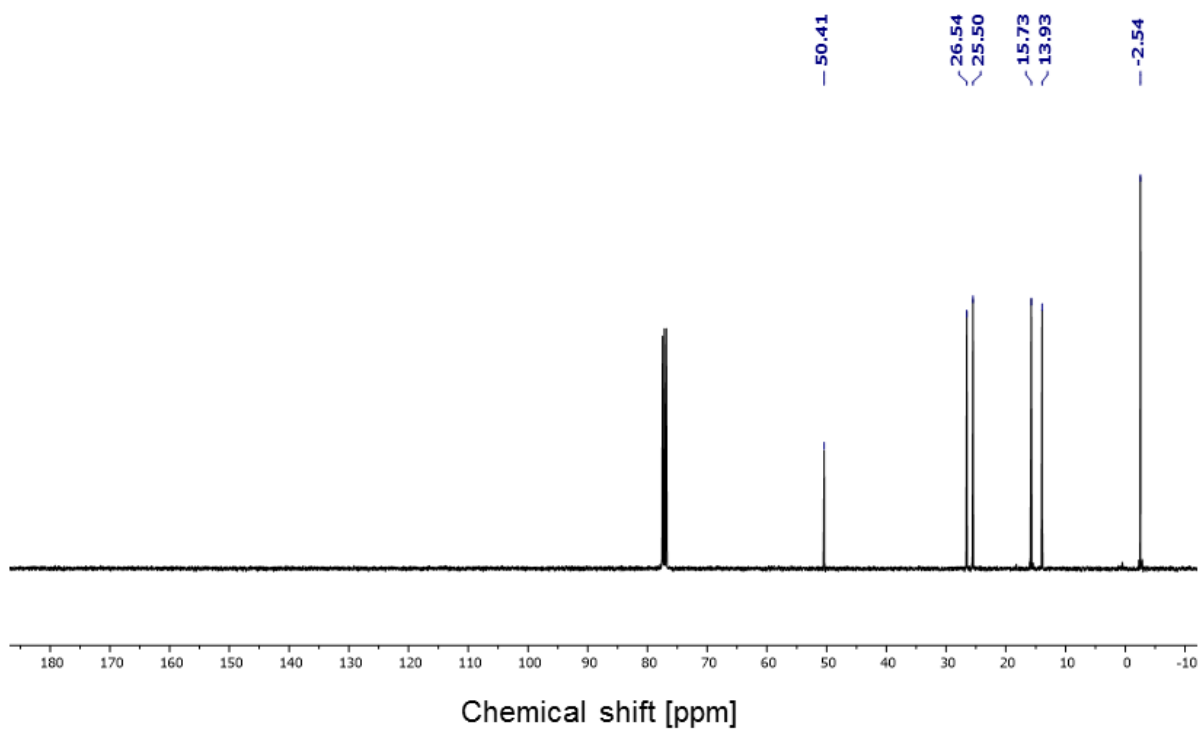

**Figure S94:**  $^{13}\text{C}\{^1\text{H}\}$  NMR spectrum of  $n\text{BuMe}_2\text{Si}(\text{OCH}_3)$  in  $\text{CDCl}_3$ .

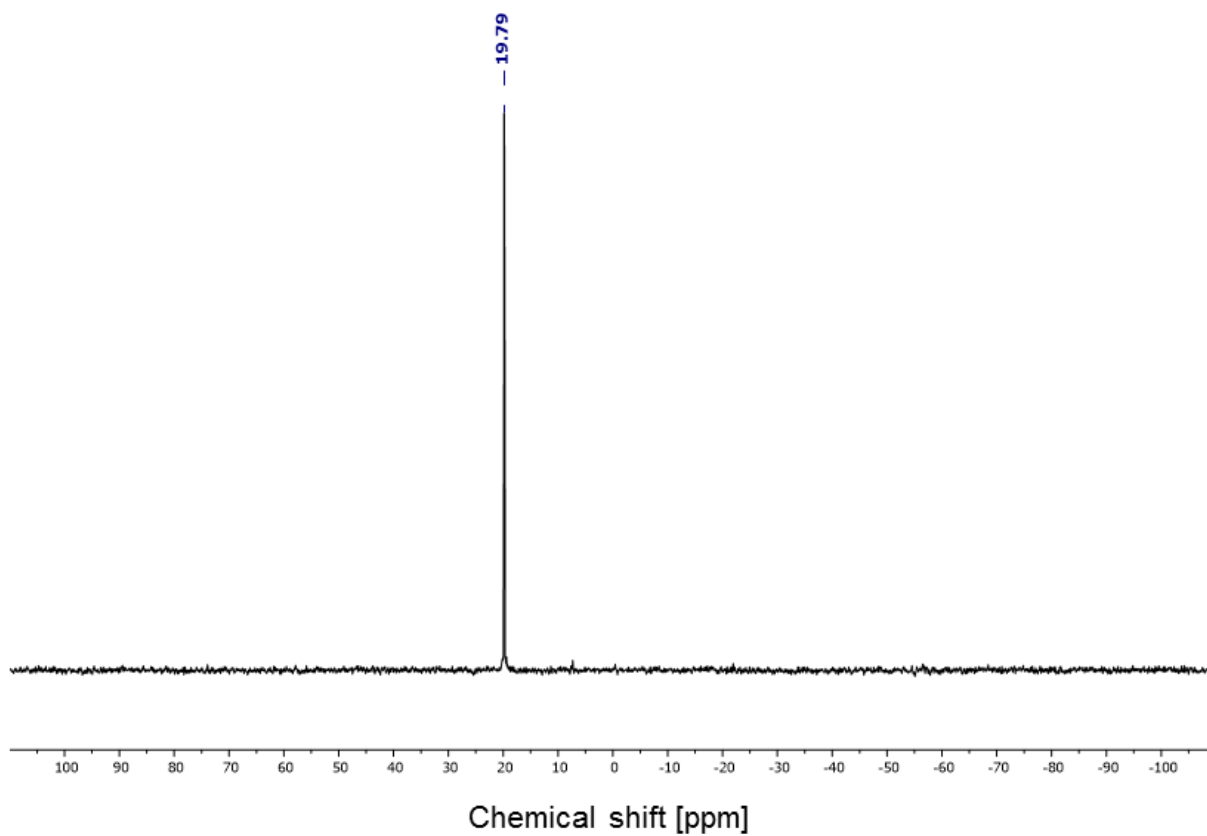

**Figure S95:**  $^{29}\text{Si}\{^1\text{H}\}$  NMR spectrum (DEPT20) of  $n\text{BuMe}_2\text{Si}(\text{OCH}_3)$  in  $\text{CDCl}_3$ .

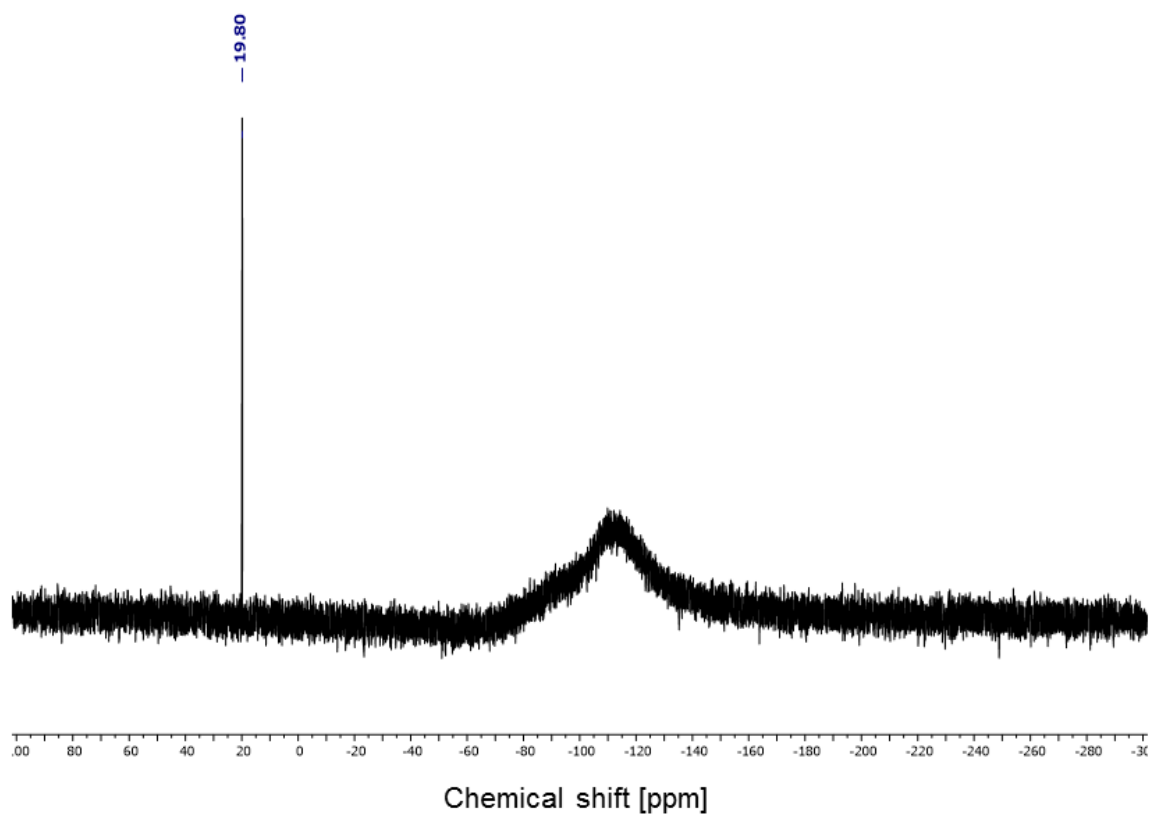

**Figure S96:**  $^{29}\text{Si}\{^1\text{H}\}$  NMR spectrum (inverse gated) of  $n\text{BuMe}_2\text{Si}(\text{OCH}_3)$  in  $\text{CDCl}_3$ .

## Catalysis of CO<sub>2</sub> Hydrosilylation

### Typical procedure for CO<sub>2</sub> hydrosilylation

In a glovebox, a J. Young-style NMR tube was charged with hydrosilane (0.18 mmol) and hexamethylbenzene (0.06 mmol). 0.5 mL of a catalyst stock solution in [D<sub>8</sub>]THF was added. The mixture was degassed by three cycles of “freeze-pump-thaw” and pressurized with 1 bar of CO<sub>2</sub>. The reaction progress was monitored by NMR spectroscopy. Selected spectra of the catalytic reaction mixture are provided below.

### Typical procedure for twostep CO<sub>2</sub> hydrosilylation

In a glovebox, a J. Young-style NMR tube was charged with silane (0.18 mmol) and hexamethylbenzene (0.06 mmol). 0.5 mL of a catalyst stock solution in [D<sub>8</sub>]THF was added. The mixture was degassed by three cycles of “freeze-pump-thaw” and pressurized with 1 bar of CO<sub>2</sub>. When hydrosilane was consumed CO<sub>2</sub> was removed by three cycles of “freeze-pump-thaw” and the reaction mixture charged with silane. The reaction progress was monitored by NMR spectroscopy. Selected spectra of the catalytic reaction mixture are provided below.

### Catalytic hydrosilylation using <sup>7</sup>BuMe<sub>2</sub>SiH:

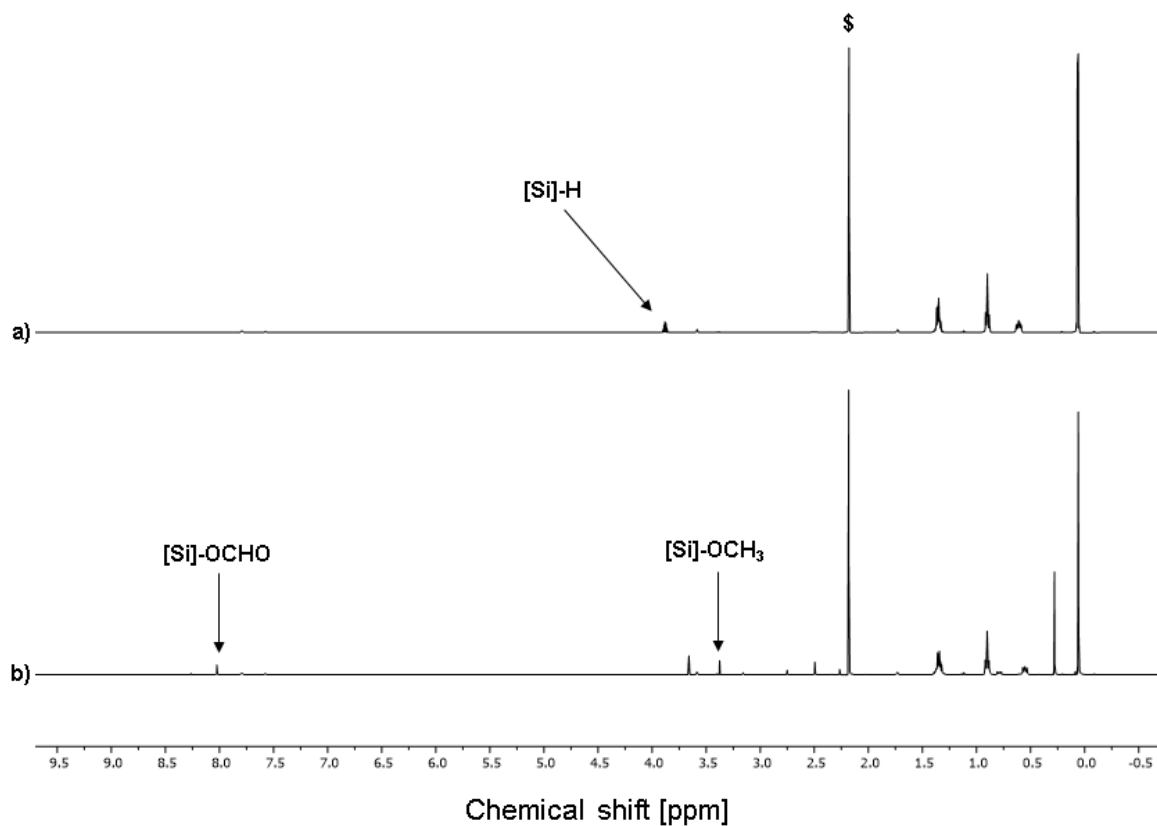

**Figure S97:** <sup>1</sup>H NMR spectra of the catalytic reaction mixture with <sup>7</sup>BuMe<sub>2</sub>SiH (\$: hexamethylbenzene as internal standard); a): at the start, b) after 6h.

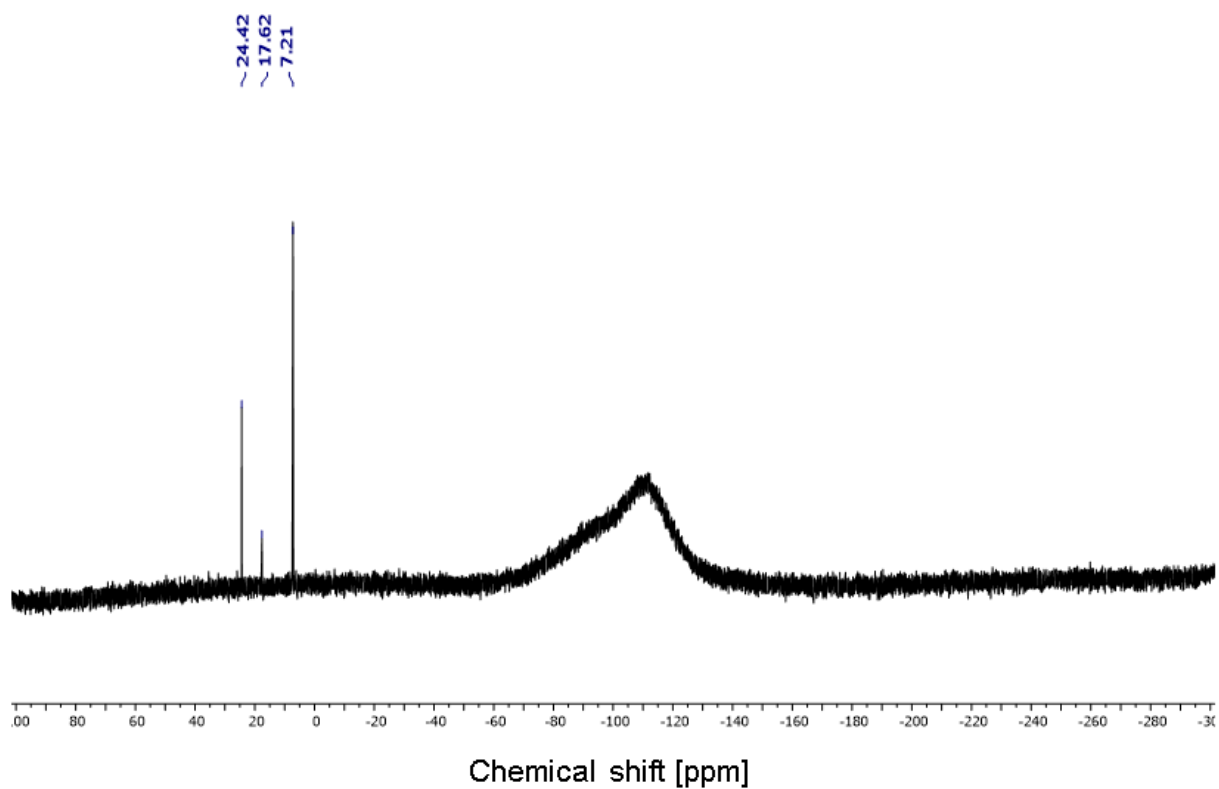

**Figure S98:**  $^{29}\text{Si}\{^1\text{H}\}$  NMR spectrum (inverse gated) of the catalytic reaction mixture using  $t\text{BuMe}_2\text{SiH}$  after 6 h.

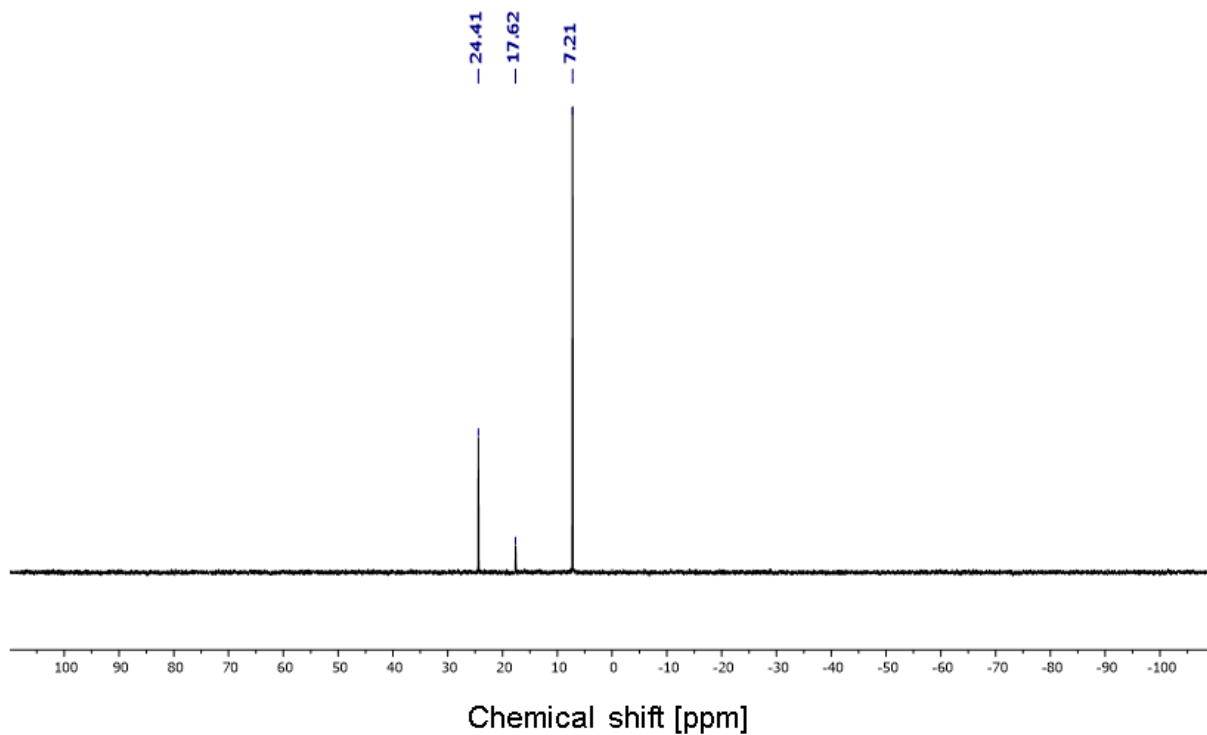

**Figure S99:**  $^{29}\text{Si}\{^1\text{H}\}$  NMR spectrum (DEPT20) of the catalytic reaction mixture using  $t\text{BuMe}_2\text{SiH}$  after 6 h.

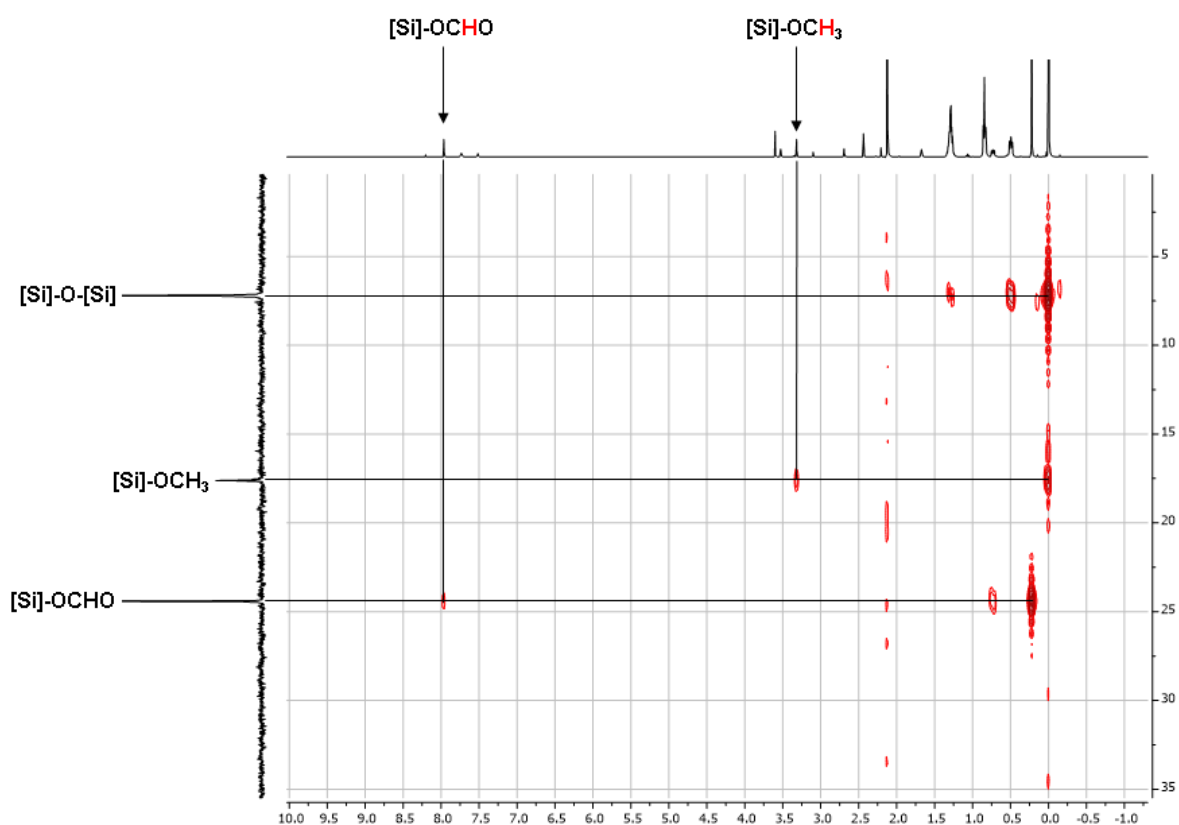

**Figure S100:**  $^{29}\text{Si}^1\text{H}$  HMBC spectrum of the catalytic reaction mixture using  $n\text{BuMe}_2\text{SiH}$  after 6 h.

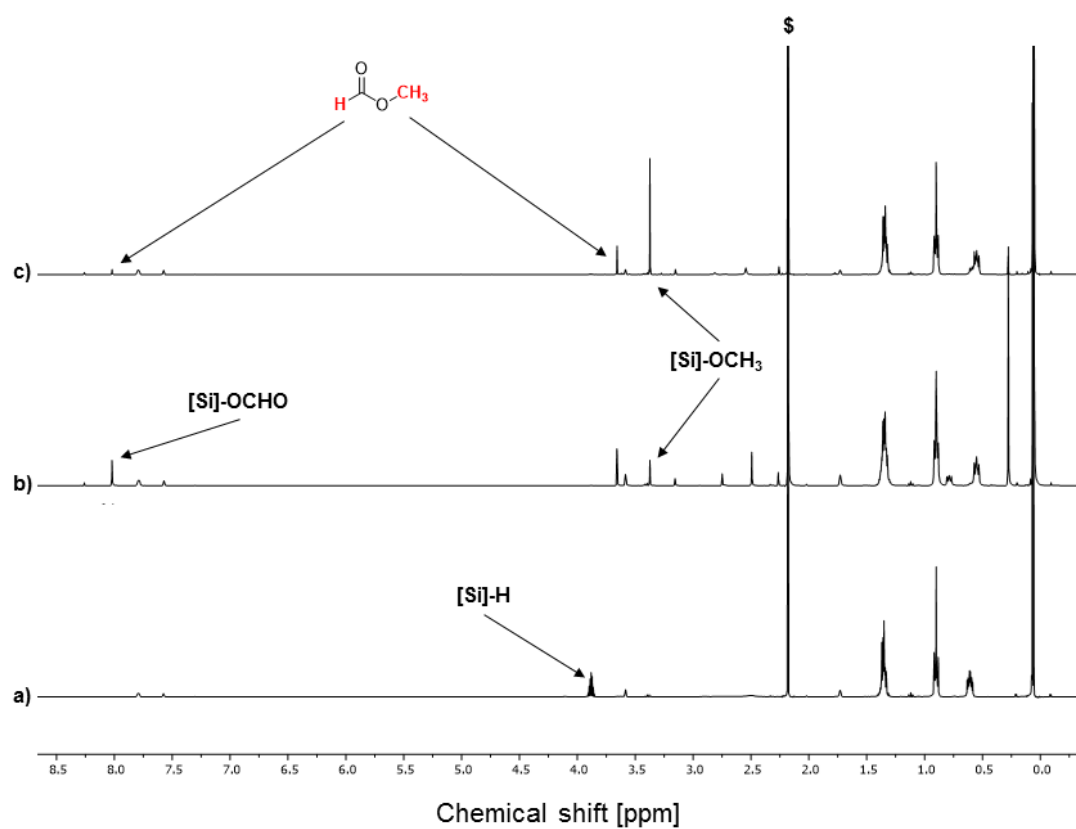

**Figure S101:**  $^1\text{H}$  NMR spectra of the catalytic reaction mixture with  $n\text{BuMe}_2\text{SiH}$  ( $\text{\$}$ : hexamethylbenzene as internal standard). a): Start of the reaction; b): after 6 h and full consumption of silane; c): 16 h and addition of 1 equiv. silane and catalyst.

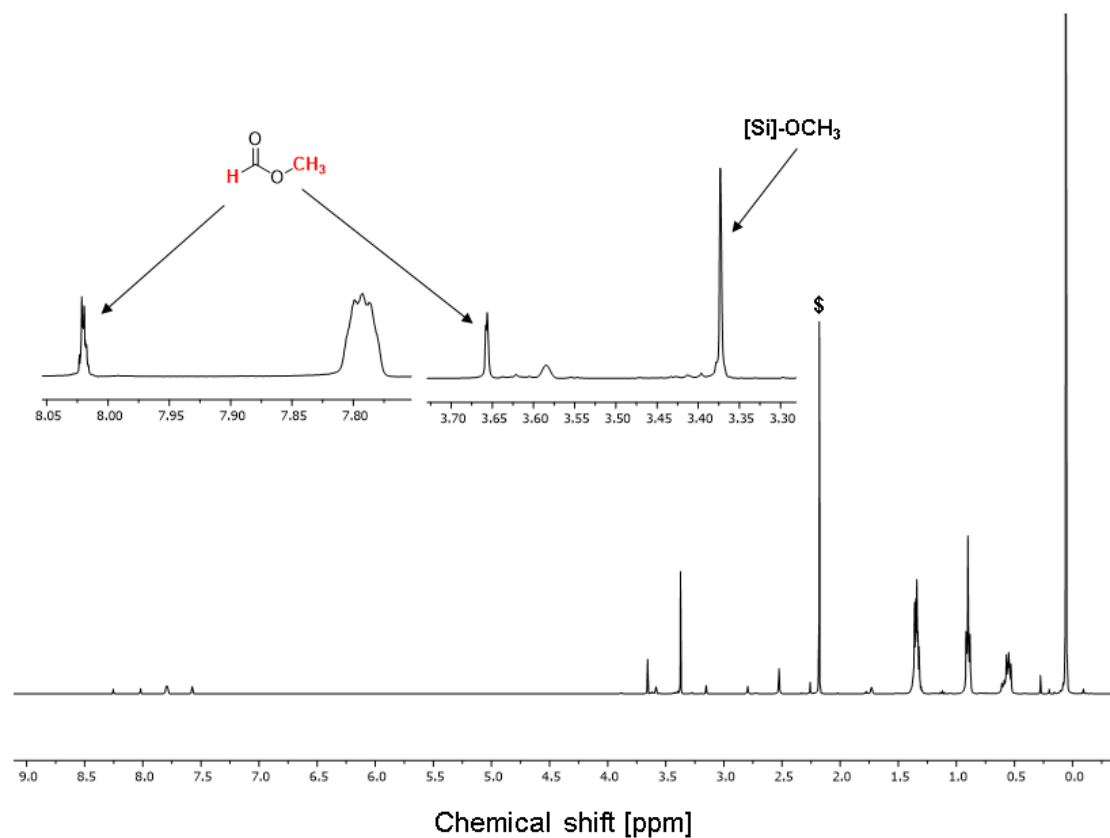

**Figure S102:**  $^1\text{H}$  NMR spectrum after 16 h of the catalytic reaction mixture with  $n\text{BuMe}_2\text{SiH}$  (\$: hexamethylbenzene as internal standard).

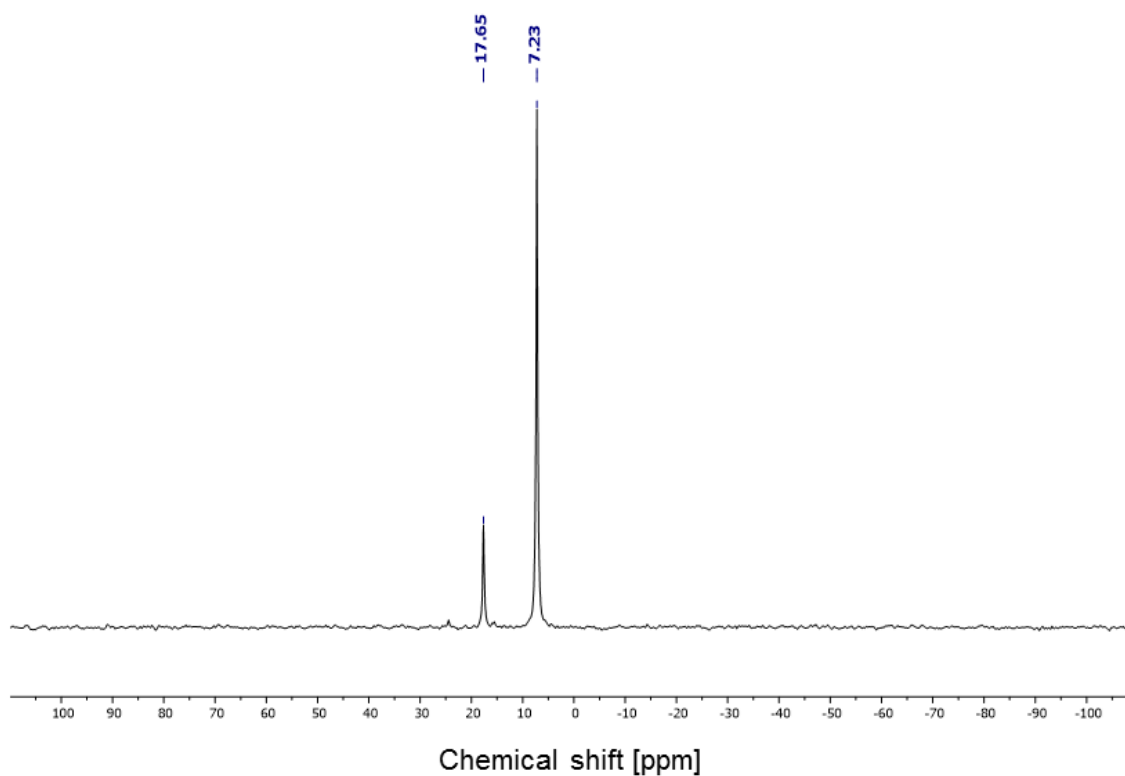

**Figure S103:**  $^{29}\text{Si}\{^1\text{H}\}$  NMR spectrum (DEPT20) of the catalytic reaction mixture using  $n\text{BuMe}_2\text{SiH}$  after 16 h.

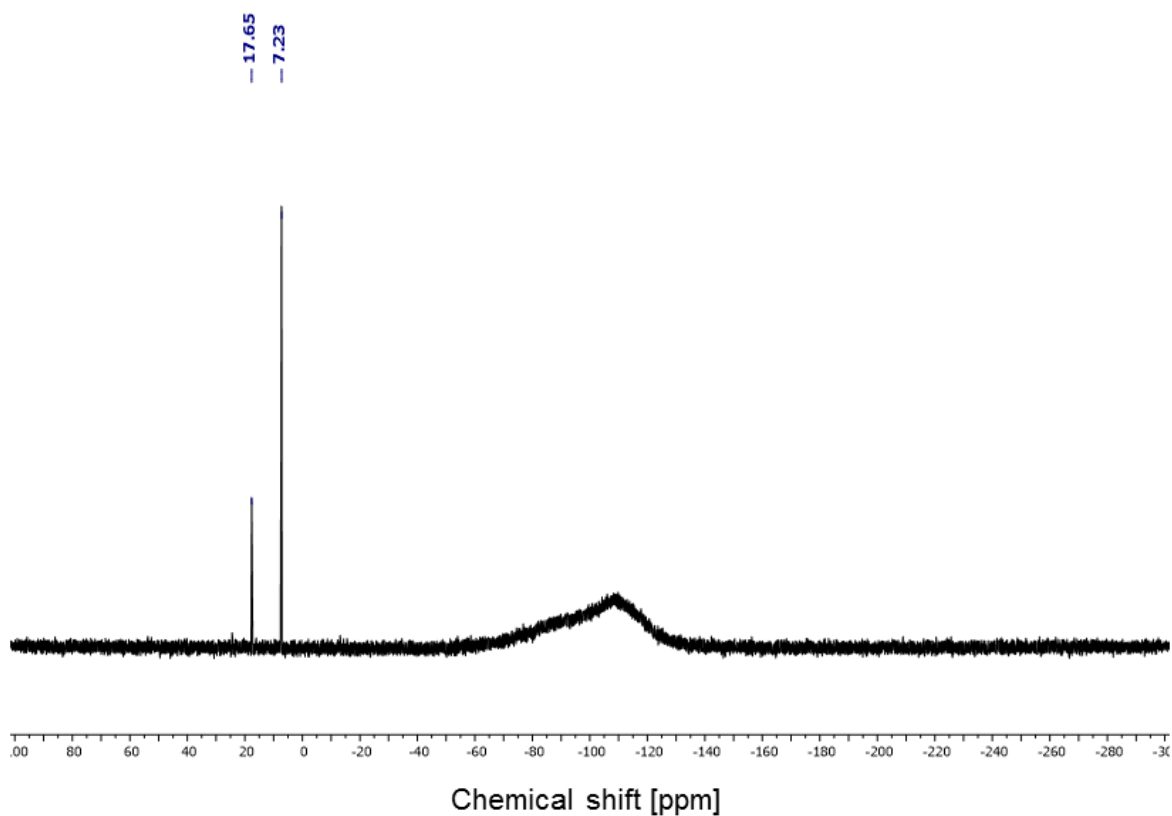

**Figure S104:**  $^{29}\text{Si}\{^1\text{H}\}$  NMR spectrum (inverse gated) of the catalytic reaction mixture using  $^n\text{BuMe}_2\text{SiH}$  after 16 h.

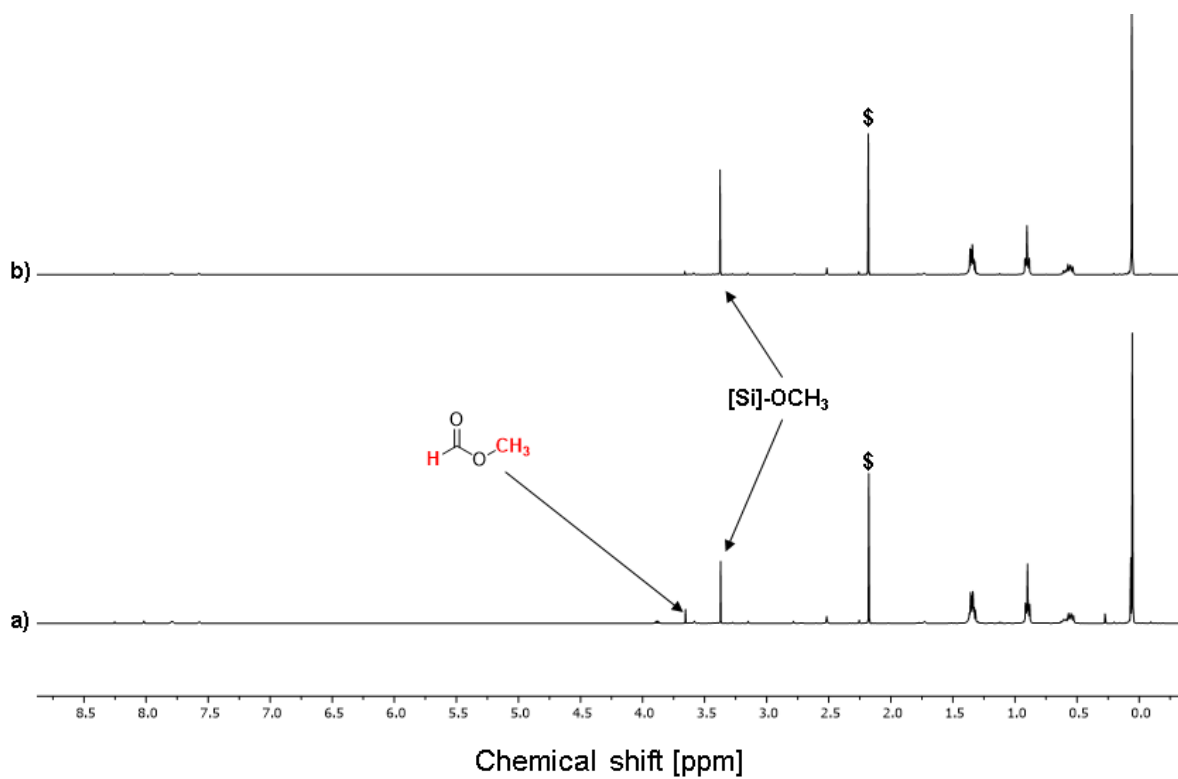

**Figure S105:**  $^1\text{H}$  NMR spectra of the catalytic reaction mixture with  $^n\text{BuMe}_2\text{SiH}$  (\$: hexamethylbenzene as internal standard). a): reaction mixture after 16 h and added silane and catalyst; b): after 24 h and excess silane (2 equiv.) and catalyst.

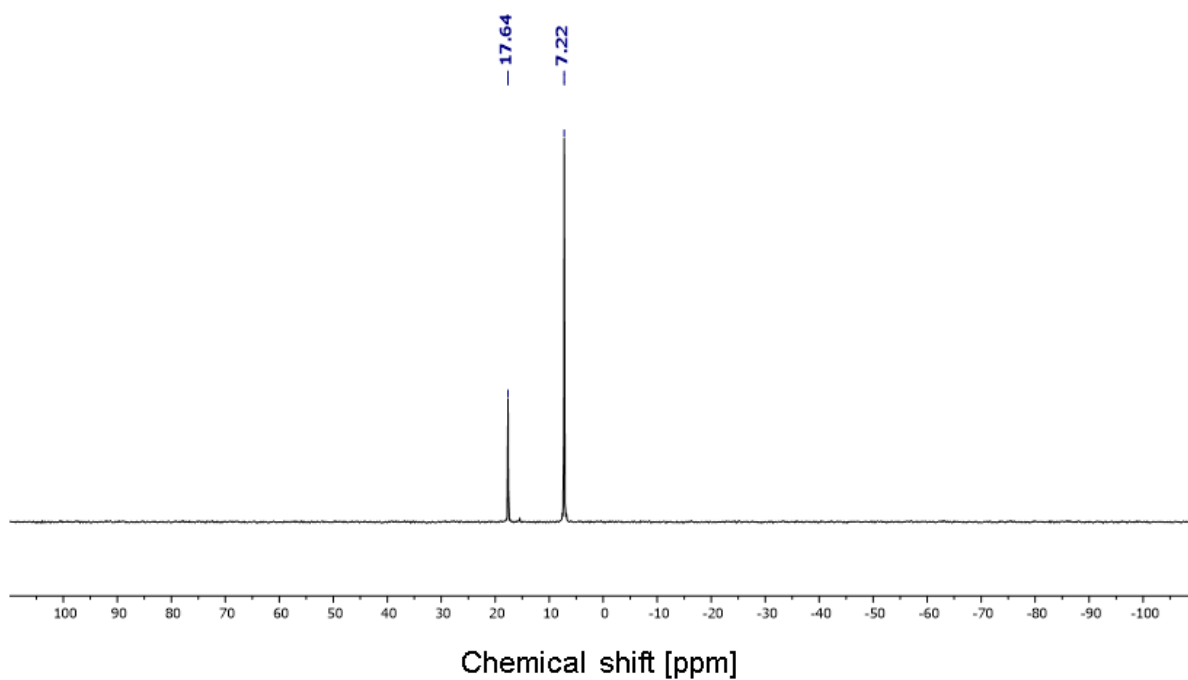

**Figure S106:**  $^{29}\text{Si}\{^1\text{H}\}$  NMR spectrum (DEPT20) of the catalytic reaction mixture using  $n\text{BuMe}_2\text{SiH}$  after 24 h.

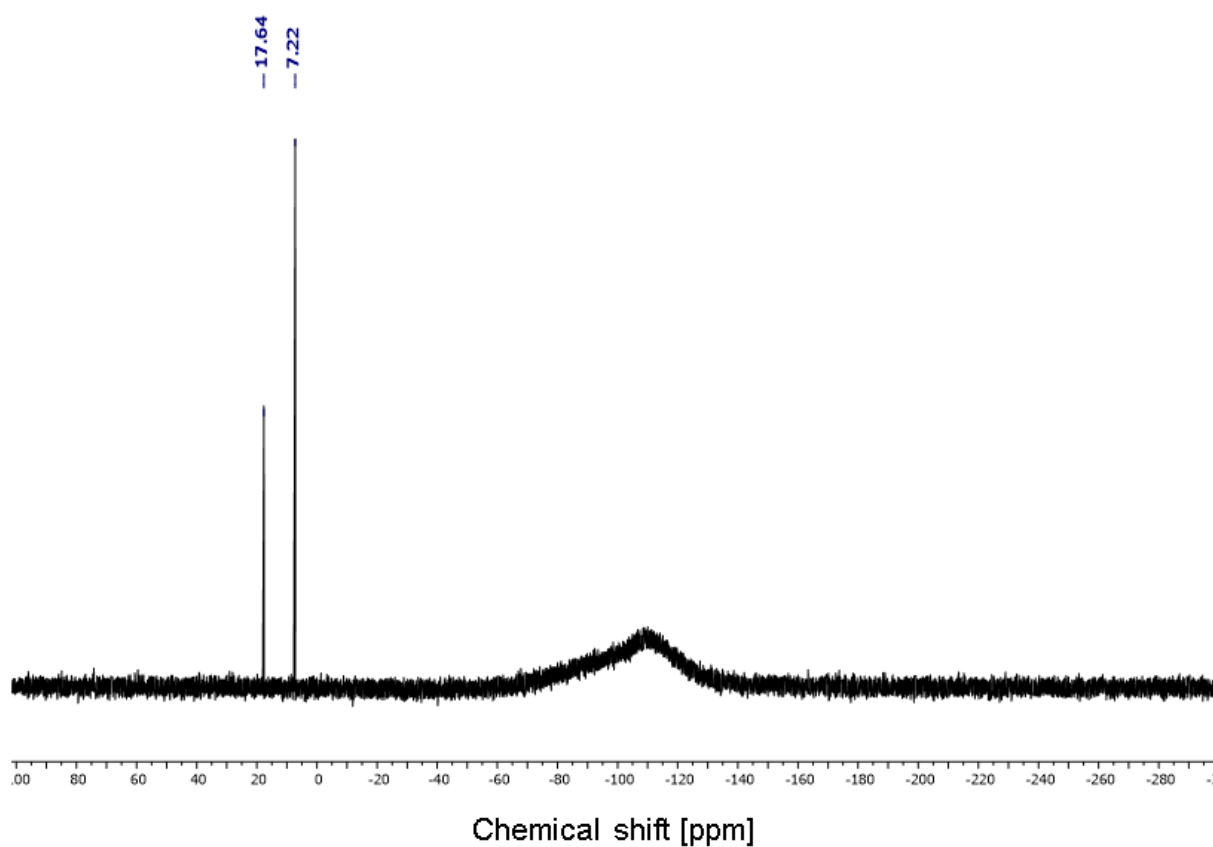

**Figure S107:**  $^{29}\text{Si}\{^1\text{H}\}$  NMR spectrum (inverse gated) of the catalytic reaction mixture using  $n\text{BuMe}_2\text{SiH}$  after 24 h.



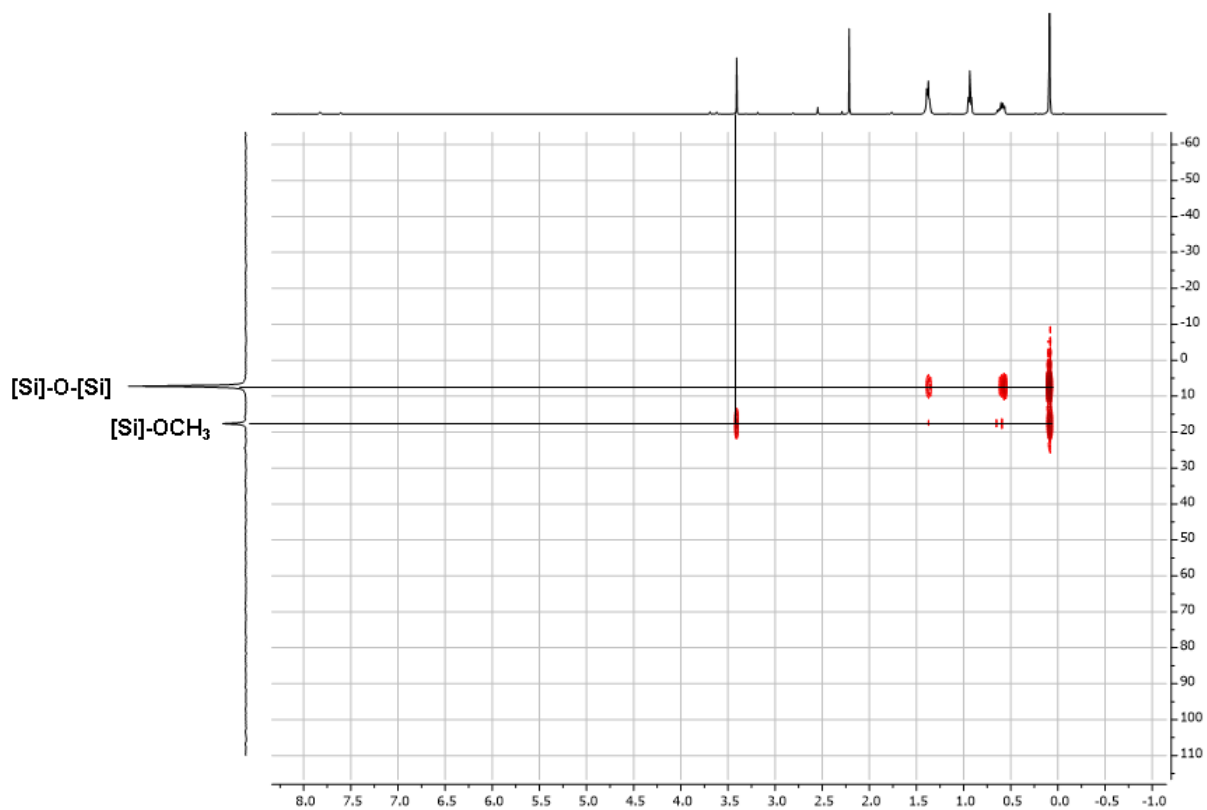

**Figure S108:**  $^{29}\text{Si}$ - $^1\text{H}$  HMBC spectrum of the catalytic reaction mixture using  $n\text{BuMe}_2\text{SiH}$  after 24 h and addition of excess silane (2 equiv.) and catalyst.

### Catalytic hydrosilylation using EtMe<sub>2</sub>SiH:

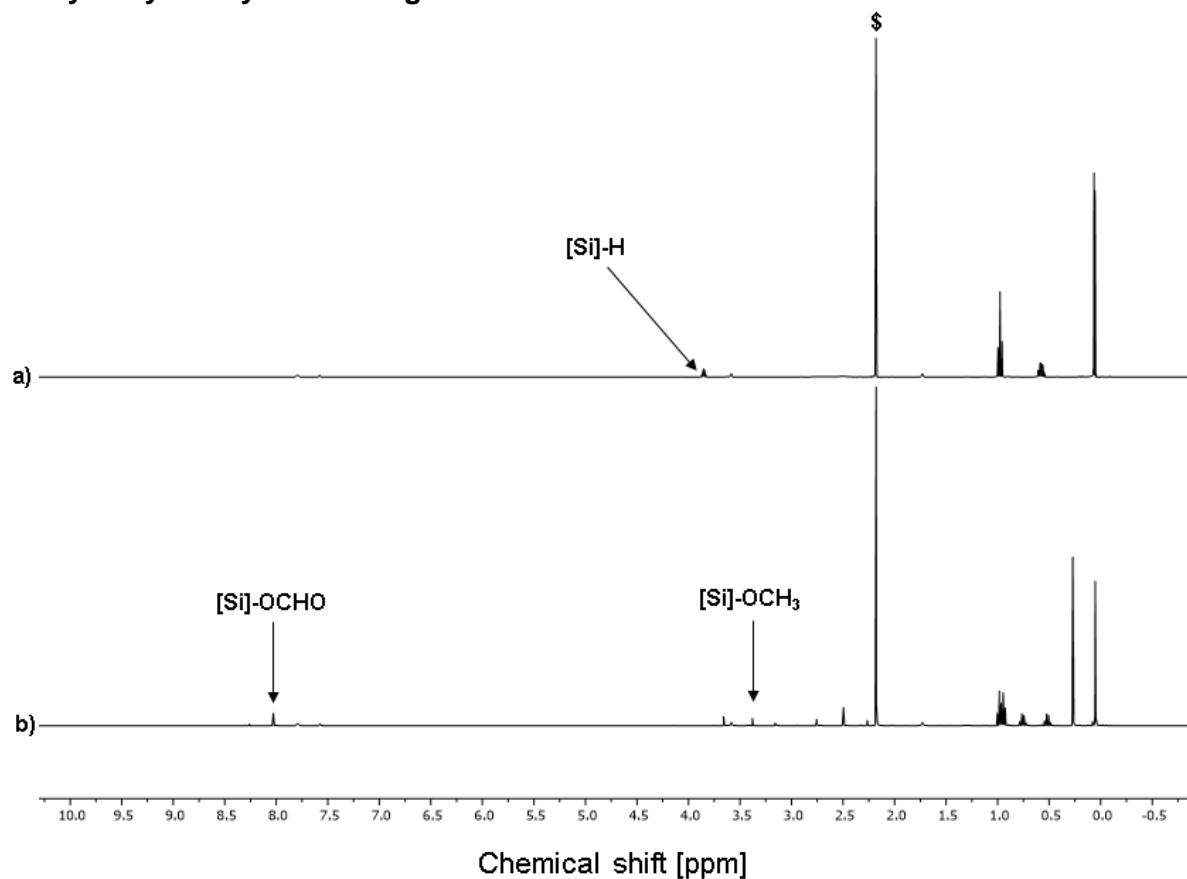

**Figure S109:** <sup>1</sup>H NMR spectra of the catalytic reaction mixture with EtMe<sub>2</sub>SiH (\$: hexamethylbenzene as internal standard); a): at the start; b): after 4h.

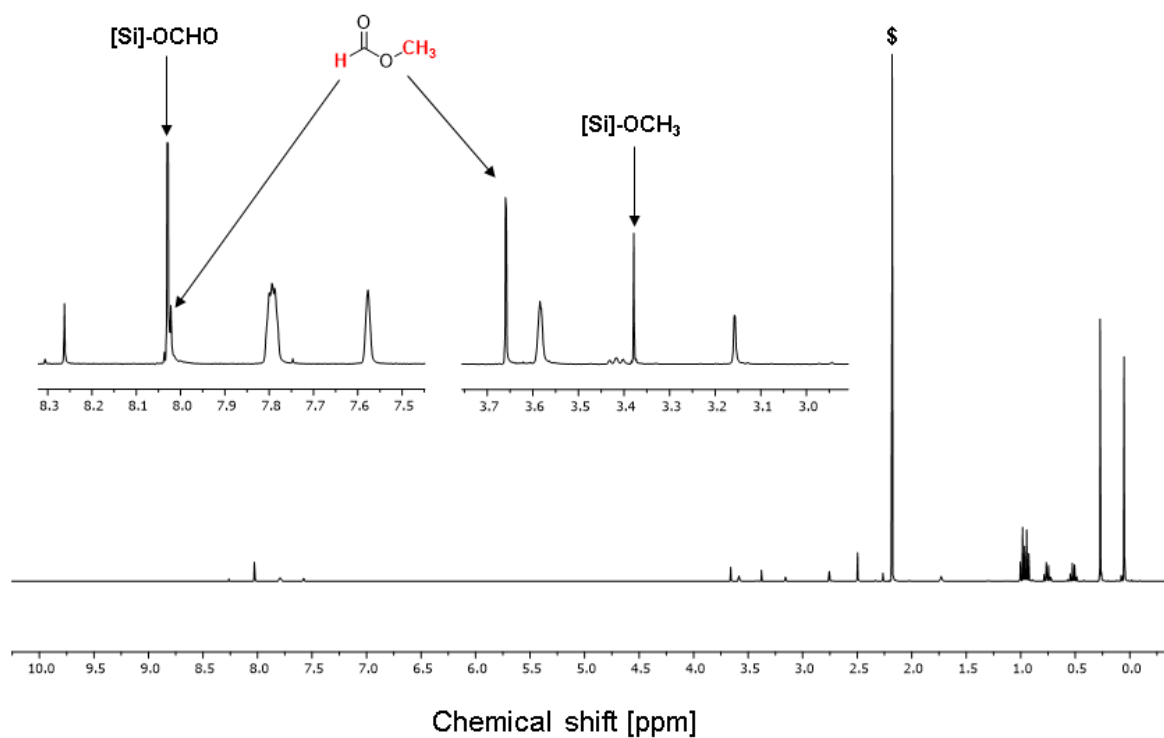

**Figure S110:** <sup>1</sup>H NMR spectra of the catalytic reaction mixture with EtMe<sub>2</sub>SiH (\$: hexamethylbenzene as internal standard) after 4h.

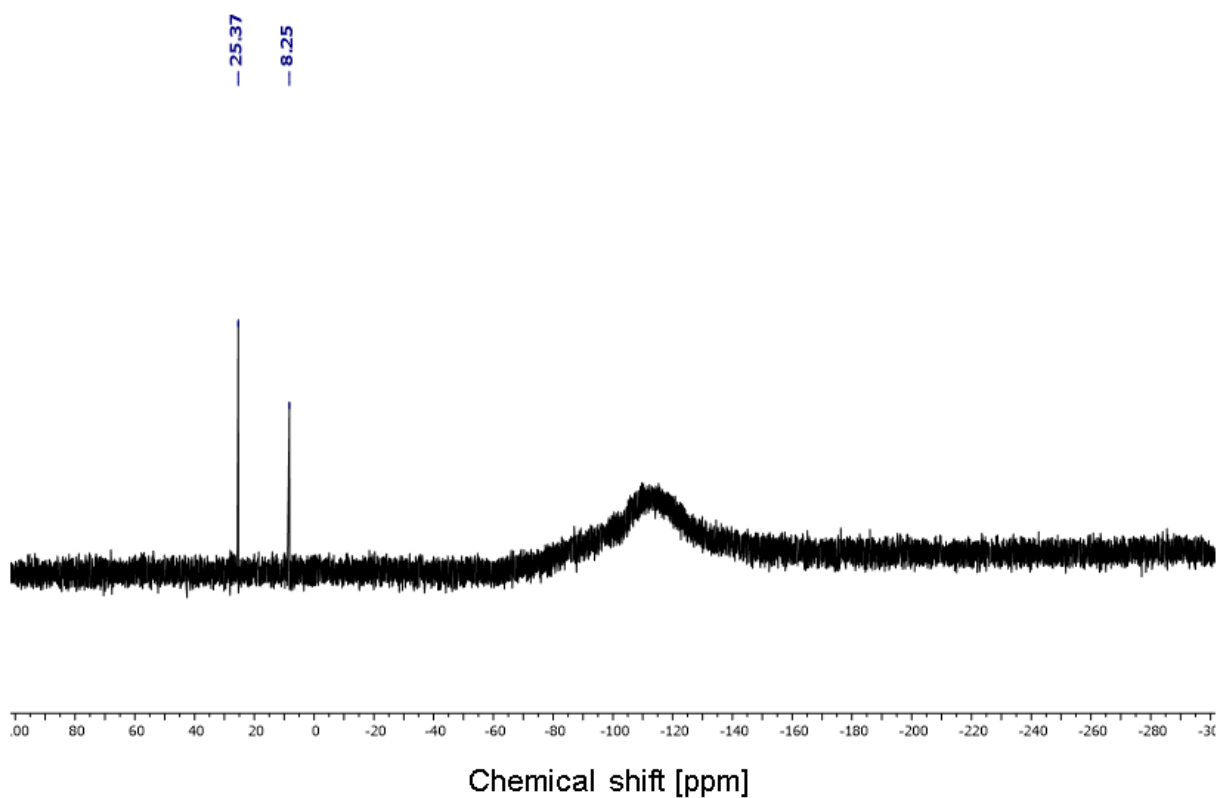

**Figure S111:**  $^{29}\text{Si}\{^1\text{H}\}$  NMR spectrum (inverse gated) of the catalytic reaction mixture using  $\text{EtMe}_2\text{SiH}$  after 4h.

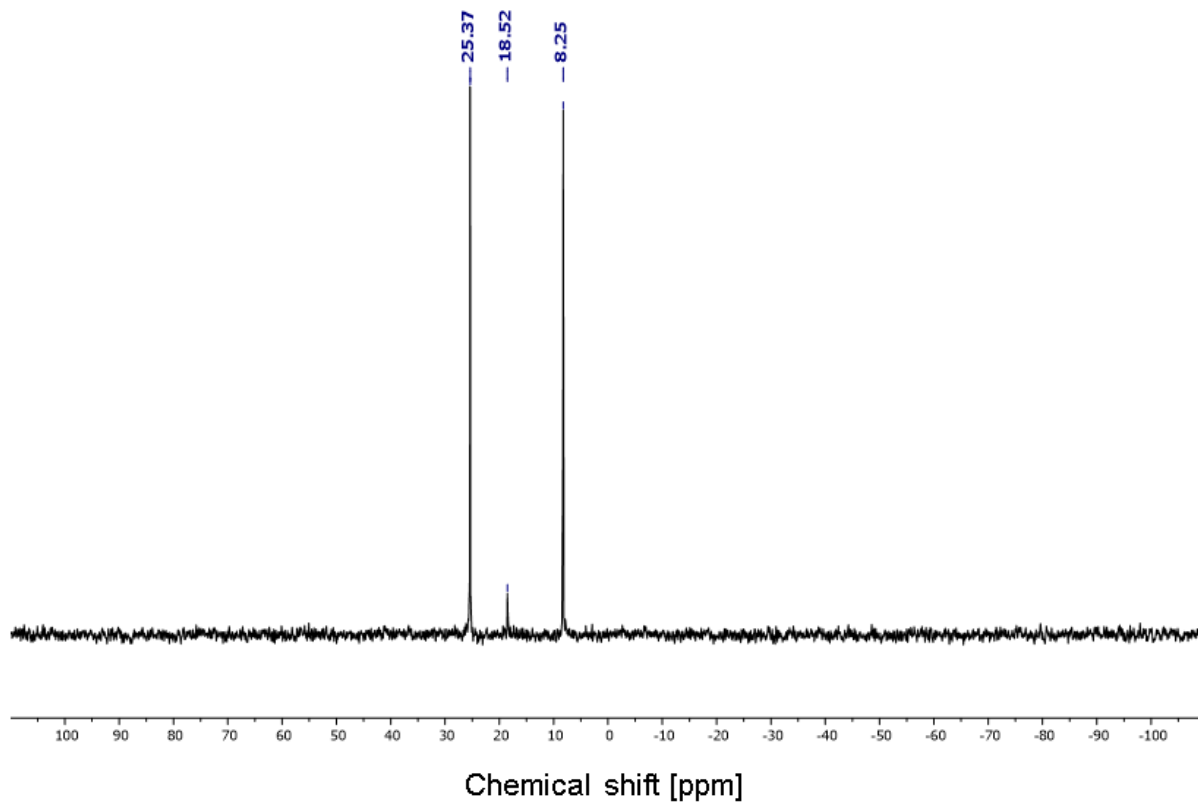

**Figure S112:**  $^{29}\text{Si}\{^1\text{H}\}$  NMR spectrum (DEPT20) of the catalytic reaction mixture using  $\text{EtMe}_2\text{SiH}$  after 4h.

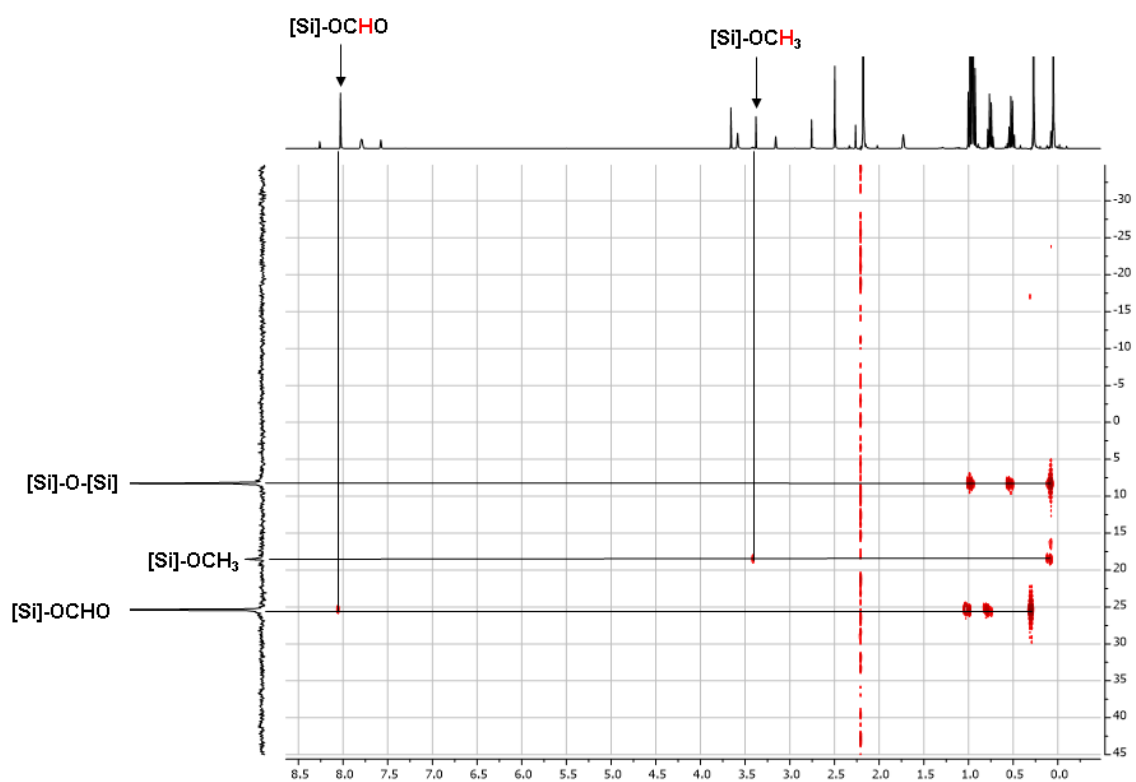

**Figure S 113:**  $^{29}\text{Si}^1\text{H}$  HMBC spectrum of the catalytic reaction mixture using  $\text{EtMe}_2\text{SiH}$  after 4h.

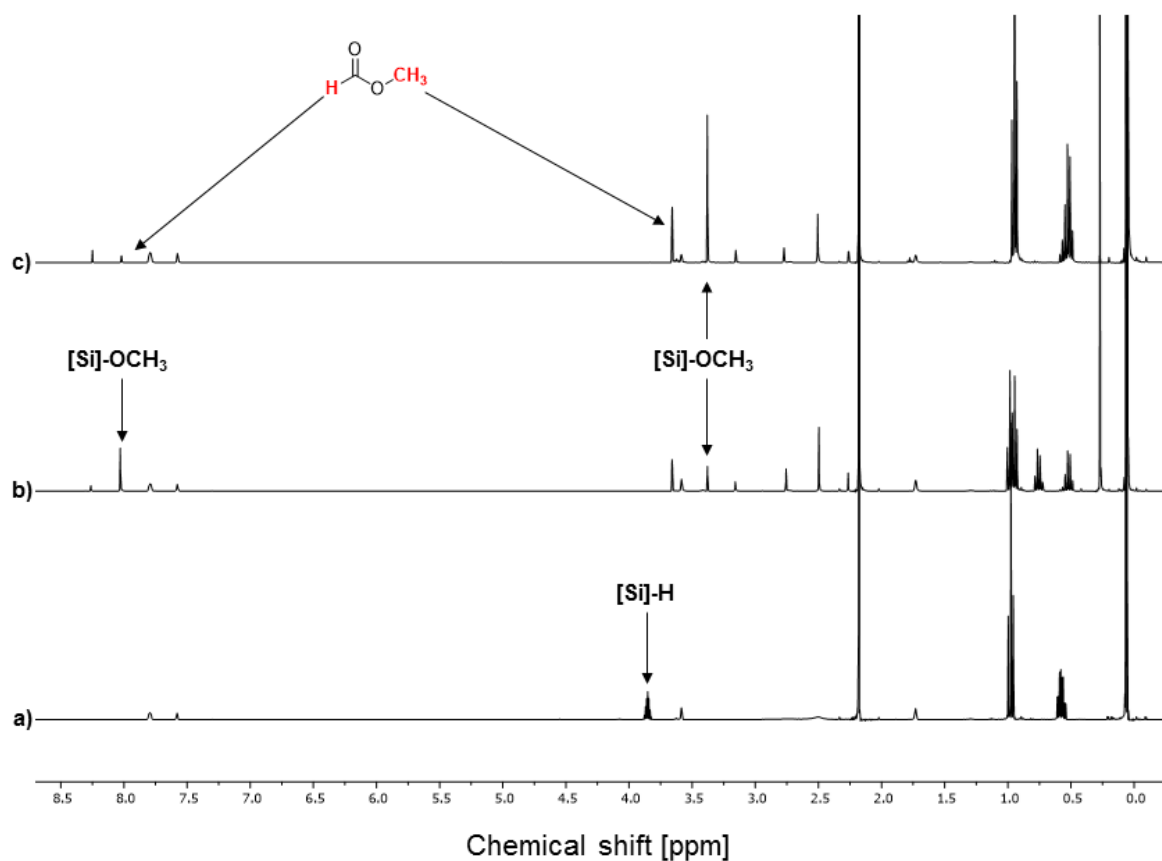

**Figure S114:**  $^1\text{H}$  NMR spectra of the catalytic reaction mixture with  $\text{EtMe}_2\text{SiH}$  ( $\text{\$}$ : hexamethylbenzene as internal standard). a): Start of the reaction; b): after 4h and full consumption of silane; c): after 8 h and addition of silane and catalyst.

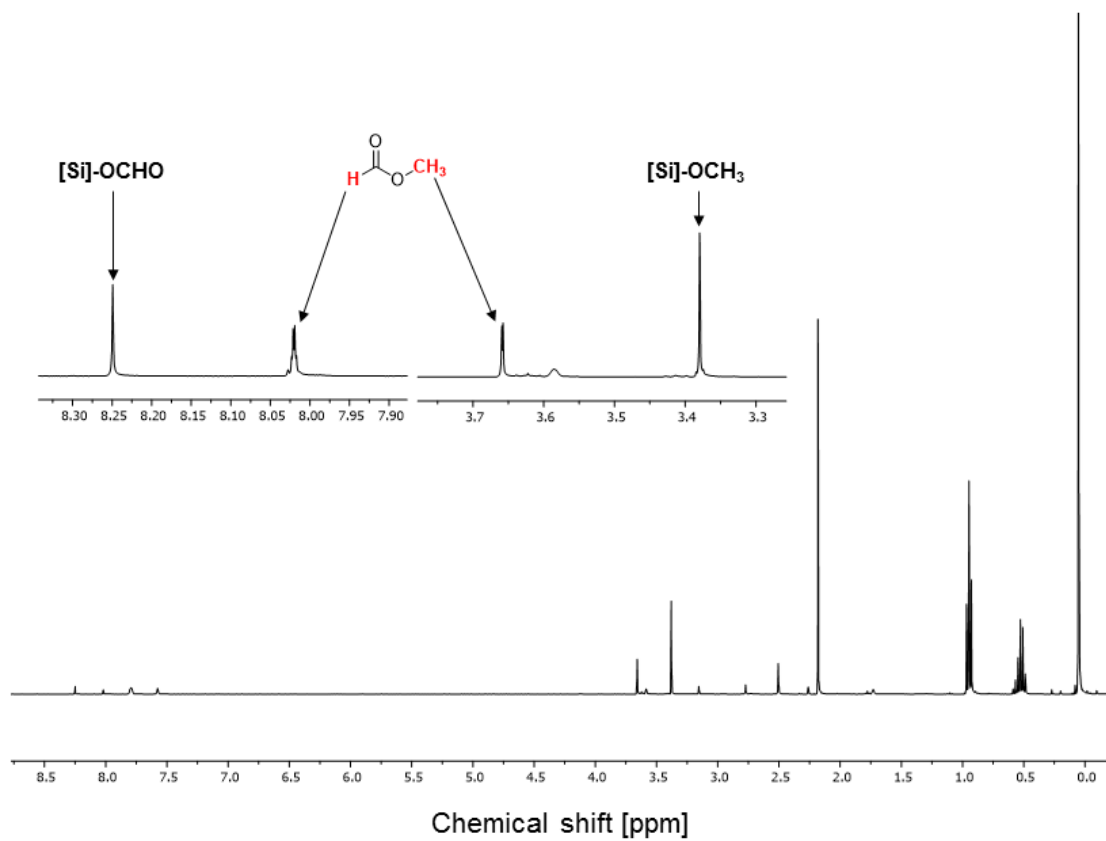

**Figure S115:**  $^1\text{H}$  NMR spectrum after 8h of the catalytic reaction mixture with  $\text{EtMe}_2\text{SiH}$  ( $\text{C}_6\text{Me}_6$  as internal standard).

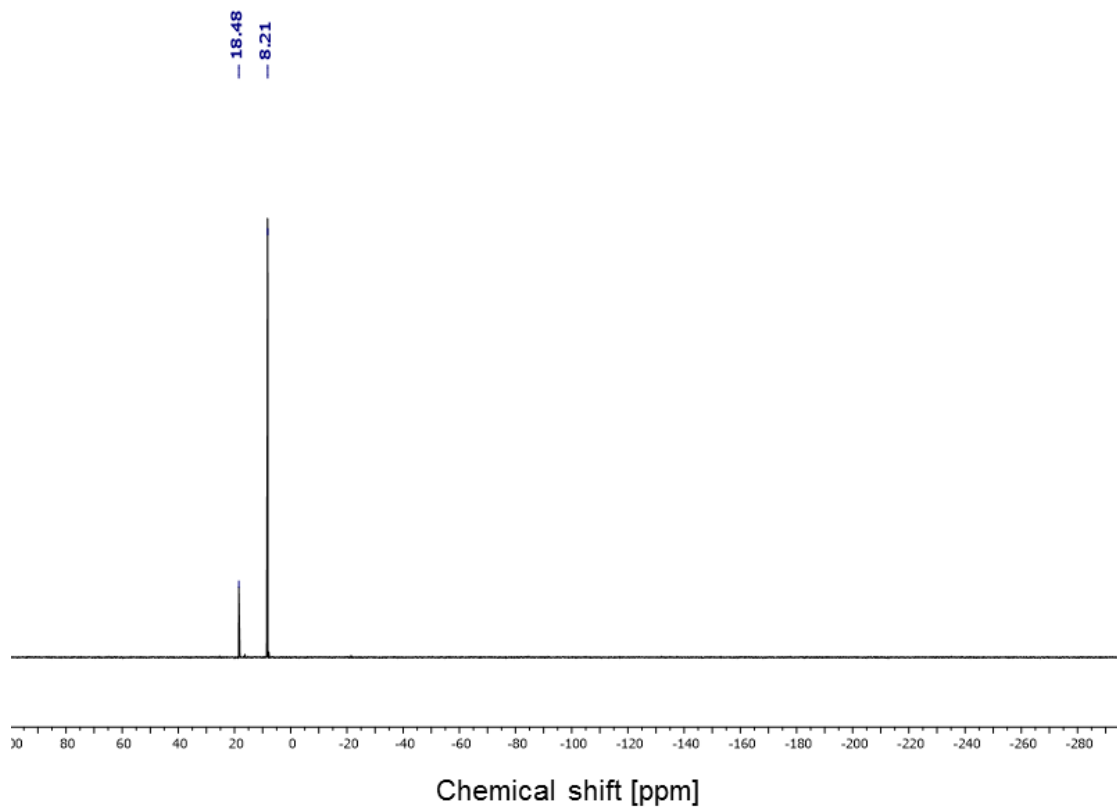

**Figure S116:**  $^{29}\text{Si}\{^1\text{H}\}$  NMR spectrum (DEPT 20) of the catalytic reaction mixture using  $\text{EtMe}_2\text{SiH}$  after 8 h.

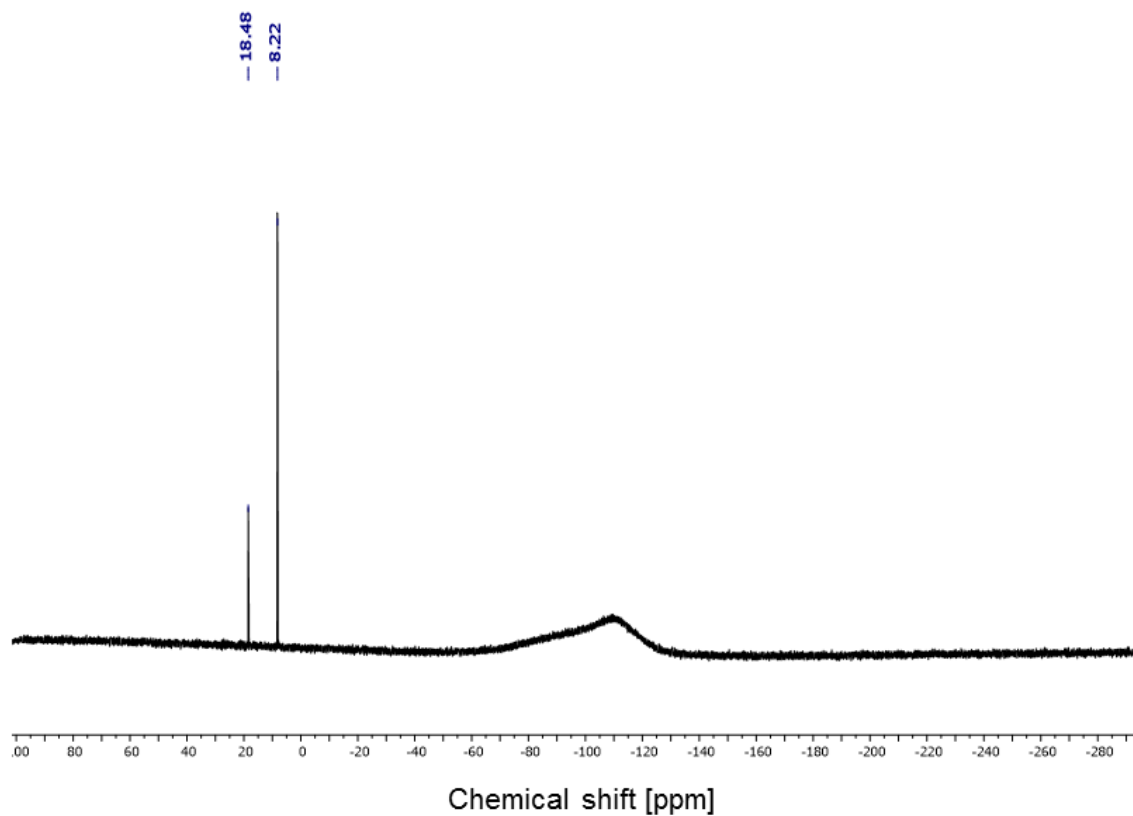

**Figure S117:**  $^{29}\text{Si}\{^1\text{H}\}$  NMR spectrum (inverse gated) of the catalytic reaction mixture using  $\text{EtMe}_2\text{SiH}$  after 8 h.

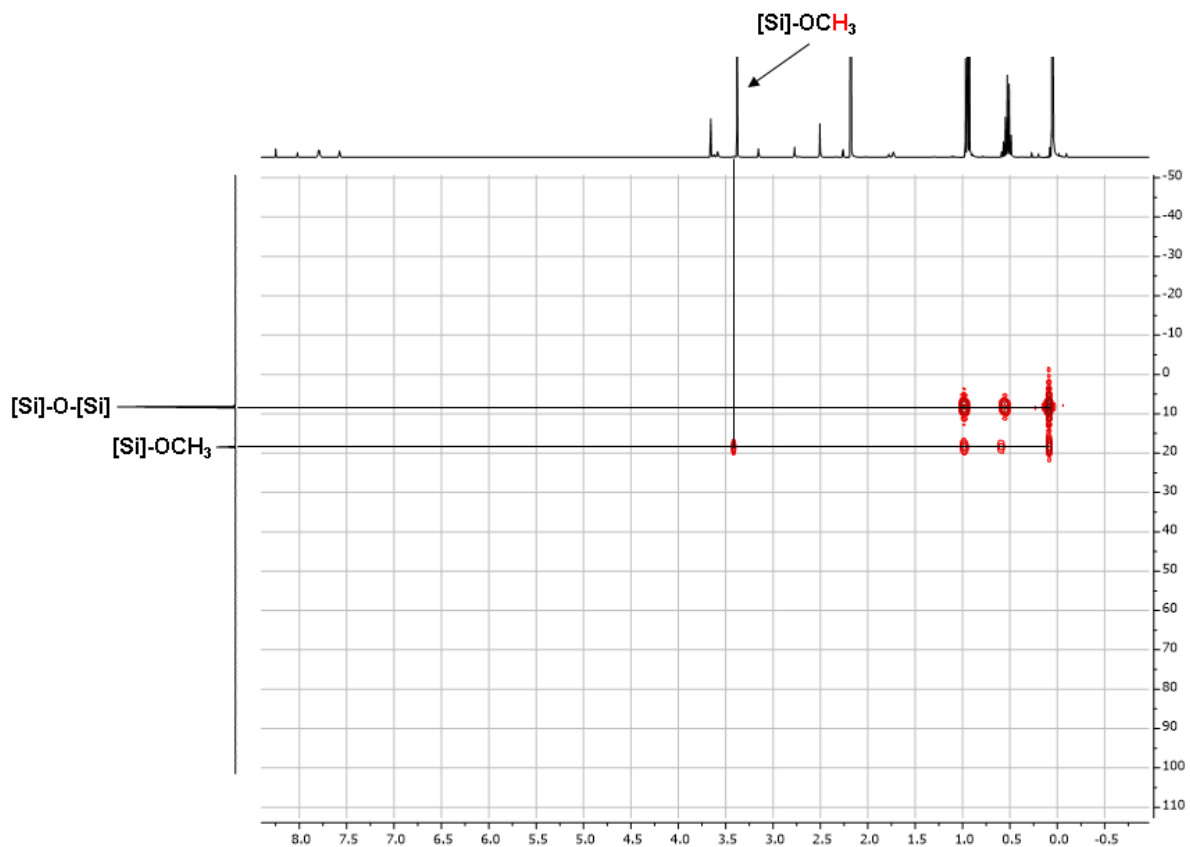

**Figure S118:**  $^{29}\text{Si}\{^1\text{H}\}$  HMBC spectrum of the catalytic reaction mixture using  $\text{EtMe}_2\text{SiH}$  after 8 h.

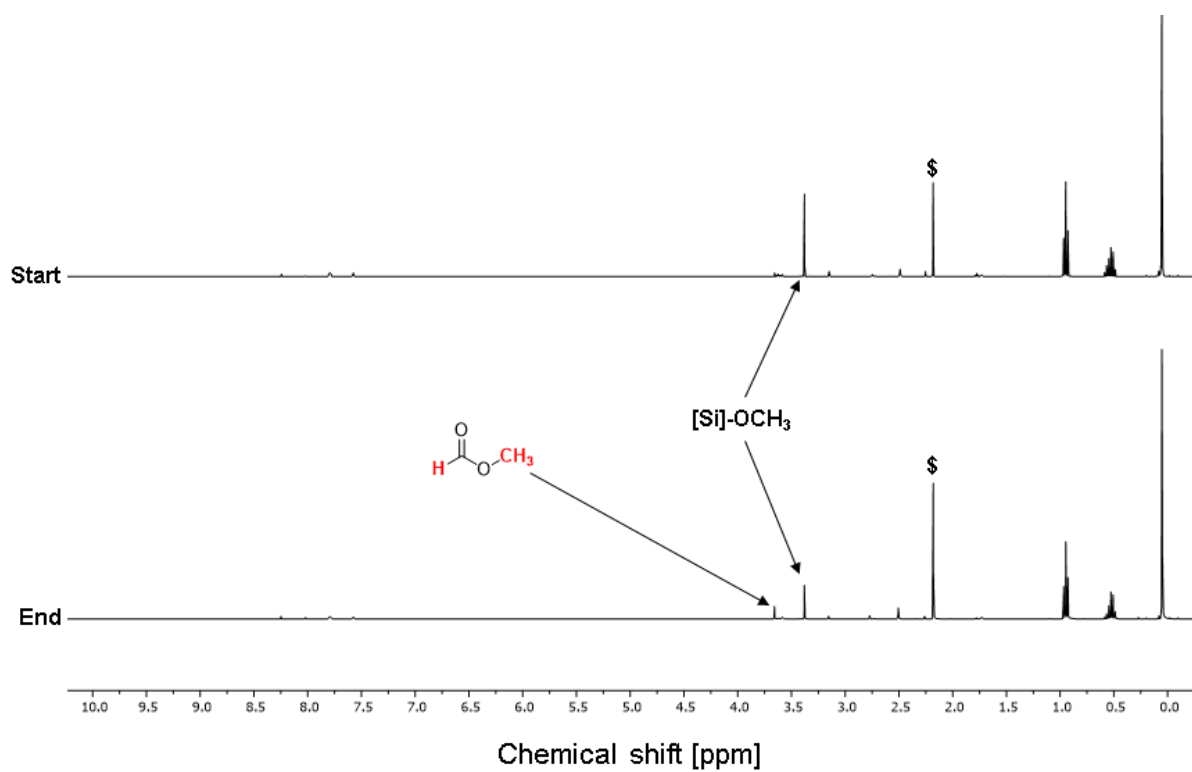

**Figure S119:**  $^1\text{H}$  NMR spectra of the catalytic reaction mixture with  $\text{EtMe}_2\text{SiH}$  ( $\text{\$}$ : hexamethylbenzene as internal standard). a): reaction mixture after 8 h and added silane and catalyst; b): after 14 h and excess silane (2 equiv.) and catalyst.

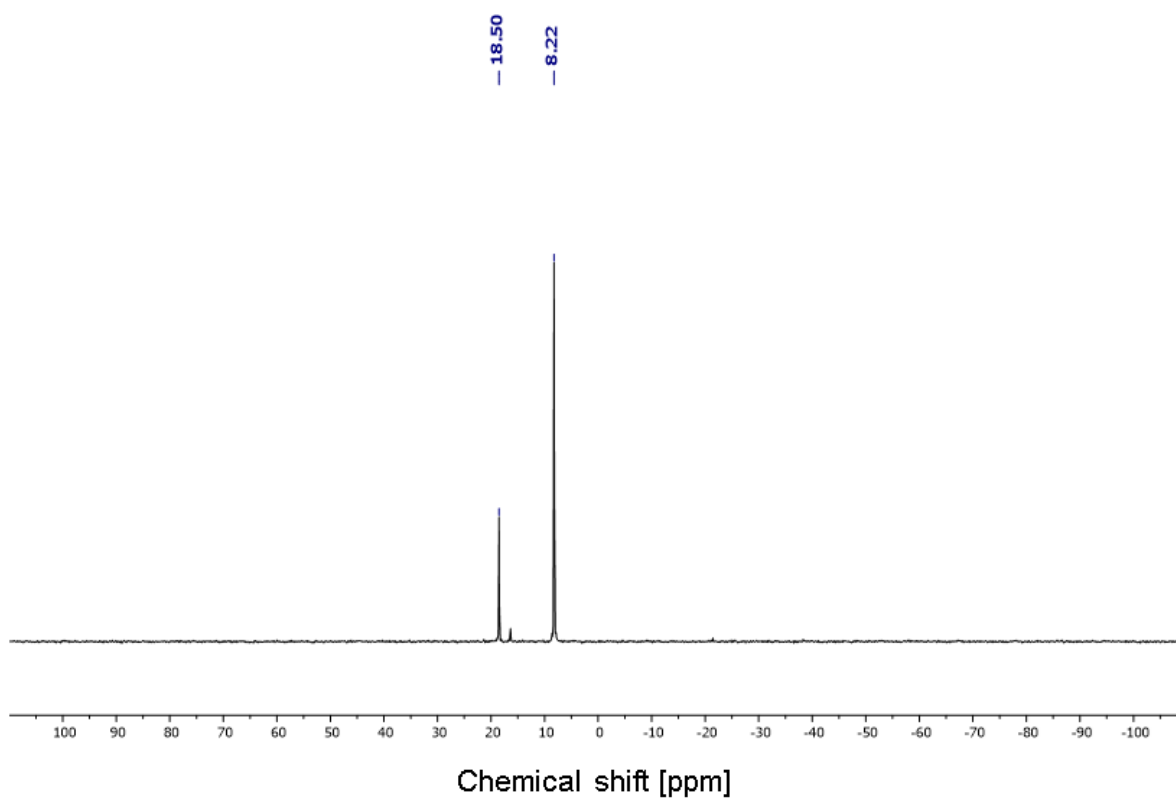

**Figure S120:**  $^{29}\text{Si}\{^1\text{H}\}$  NMR spectrum (DEPT 20) of the catalytic reaction mixture using  $\text{EtMe}_2\text{SiH}$  after 14 h.

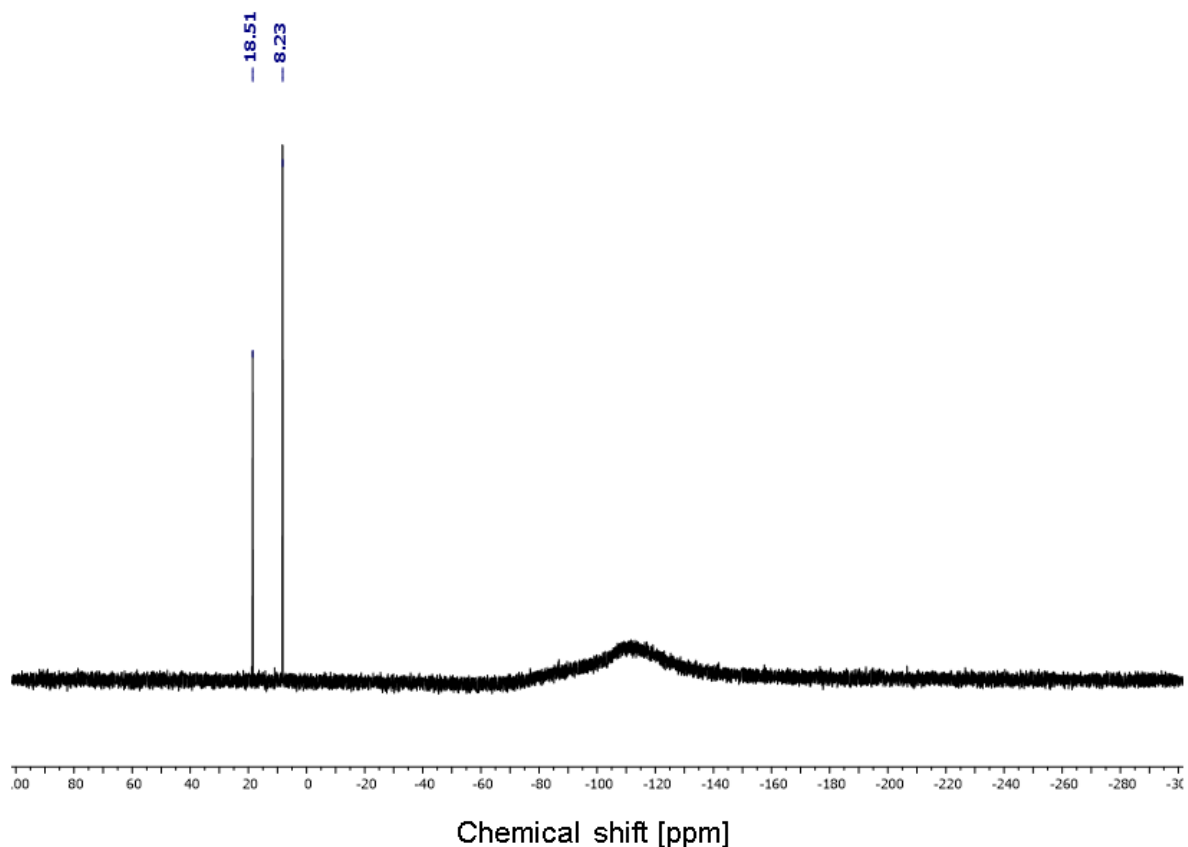

**Figure S121:**  $^{29}\text{Si}\{^1\text{H}\}$  NMR spectrum (inverse gated) of the catalytic reaction mixture using  $\text{EtMe}_2\text{SiH}$  after 14 h.

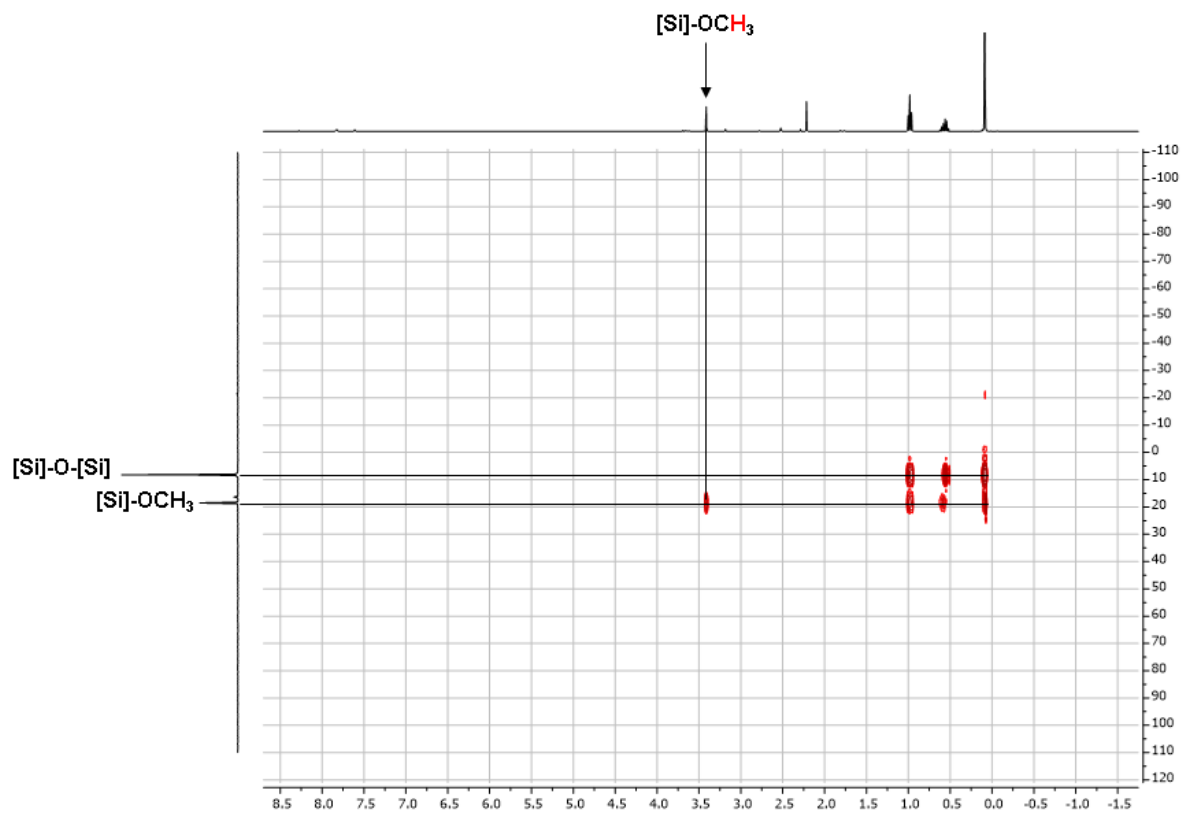

**Figure S122:**  $^{29}\text{Si}\{^1\text{H}\}$  HMBC spectrum of the catalytic reaction mixture using  $\text{EtMe}_2\text{SiH}$  after 14 h.



## Catalytic hydrosilylation using $\text{Et}_3\text{SiH}$ :

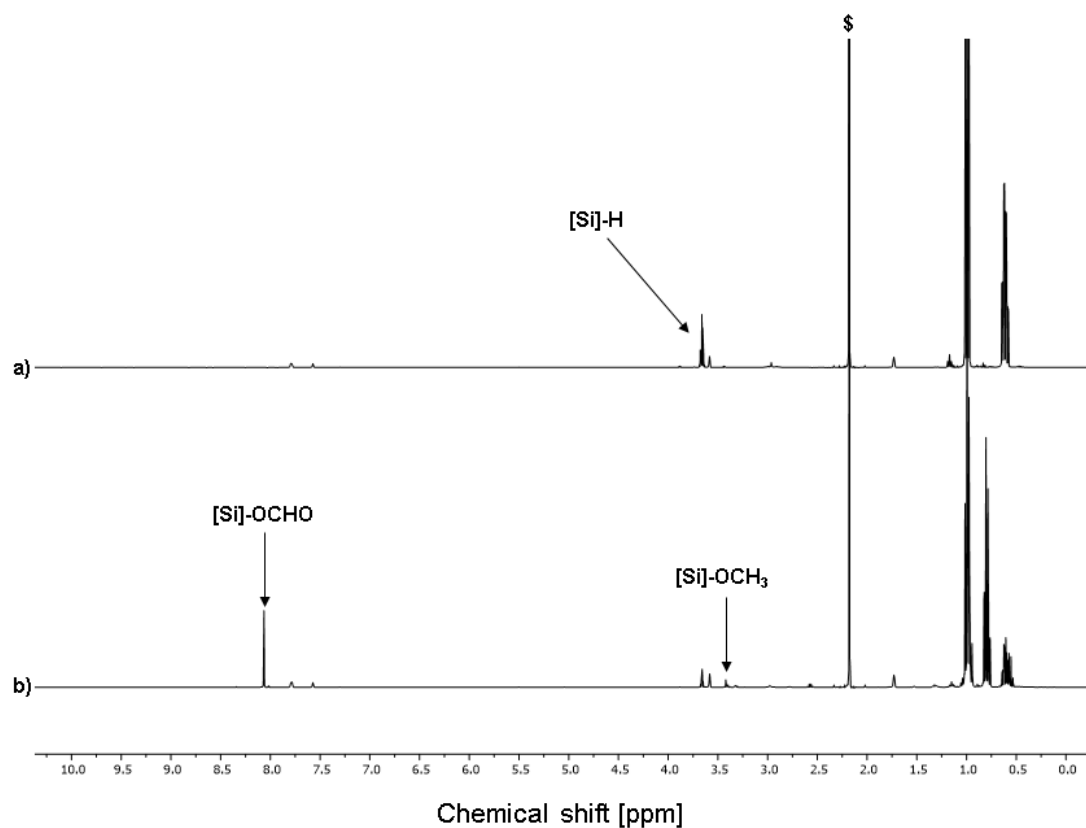

**Figure S123:**  $^1\text{H}$  NMR spectra of the catalytic reaction mixture with  $\text{Et}_3\text{SiH}$  (\$: hexamethylbenzene as internal standard); a) at the start; b) after 48 h.

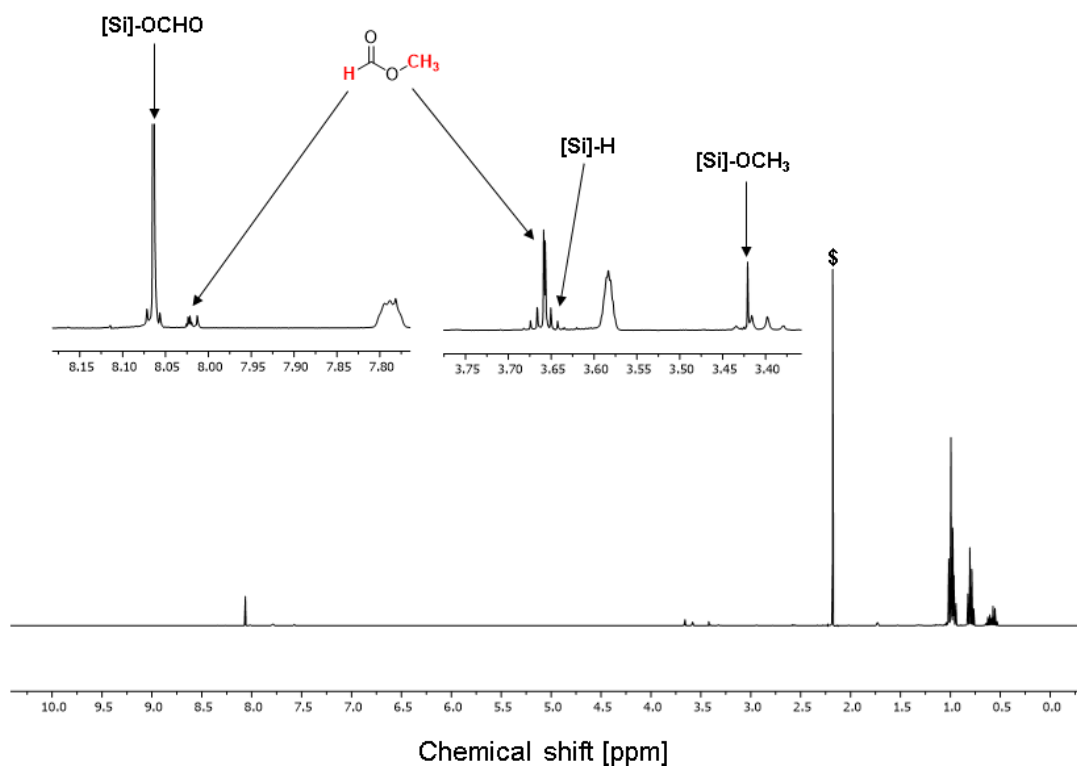

**Figure S124:**  $^1\text{H}$  NMR spectra at the after 48 h of the catalytic reaction mixture with  $\text{Et}_3\text{SiH}$  (\$: hexamethylbenzene as internal standard).

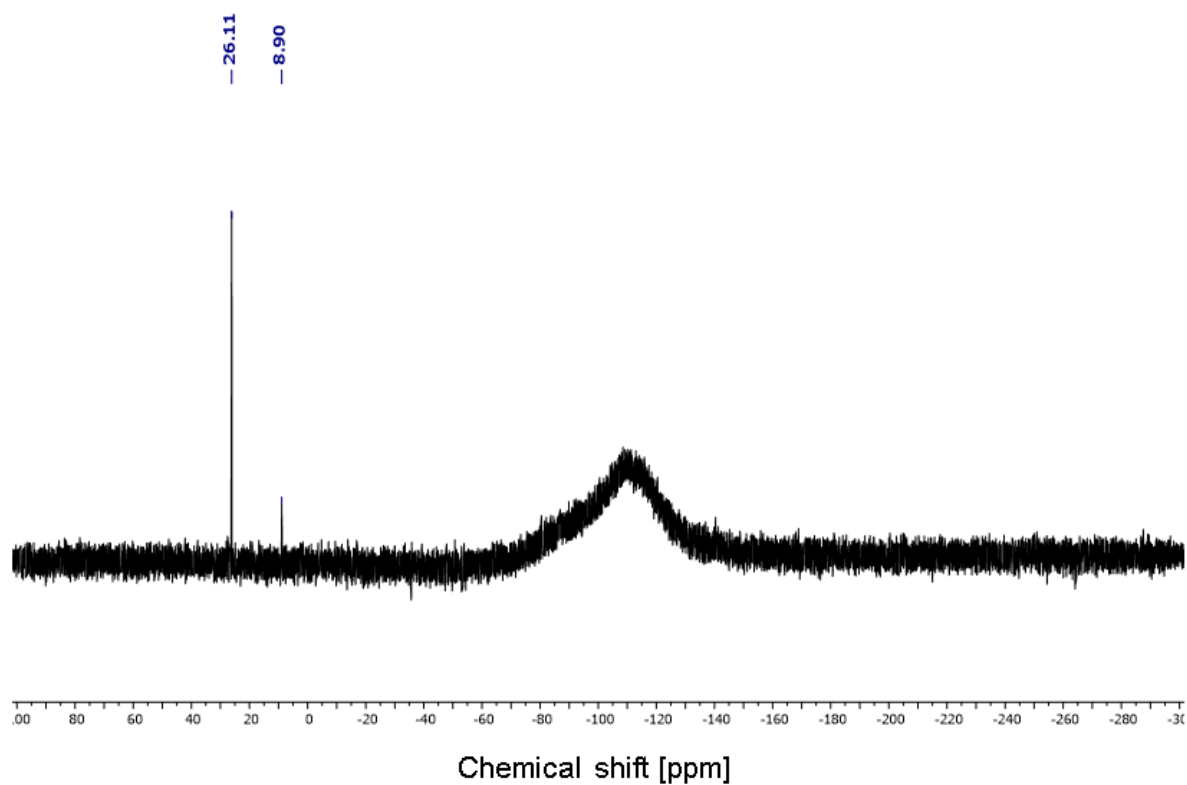

**Figure S125:**  $^{29}\text{Si}\{^1\text{H}\}$  NMR spectrum (inverse gated) of the catalytic reaction mixture using  $\text{Et}_3\text{SiH}$  after 48 h.

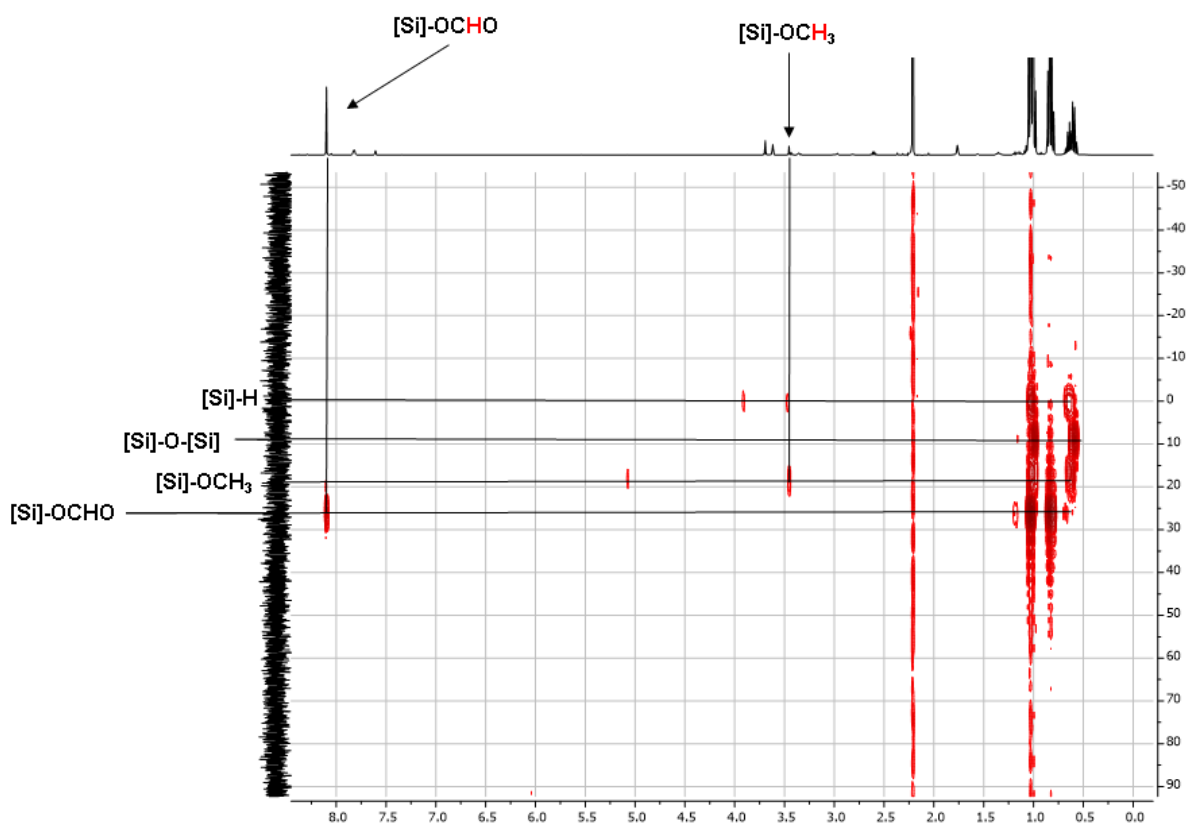

**Figure S126:**  $^{29}\text{Si}\{^1\text{H}\}$  HMBC spectrum of the catalytic reaction mixture using  $\text{Et}_3\text{SiH}$  after 48 h.

## Background Catalysis

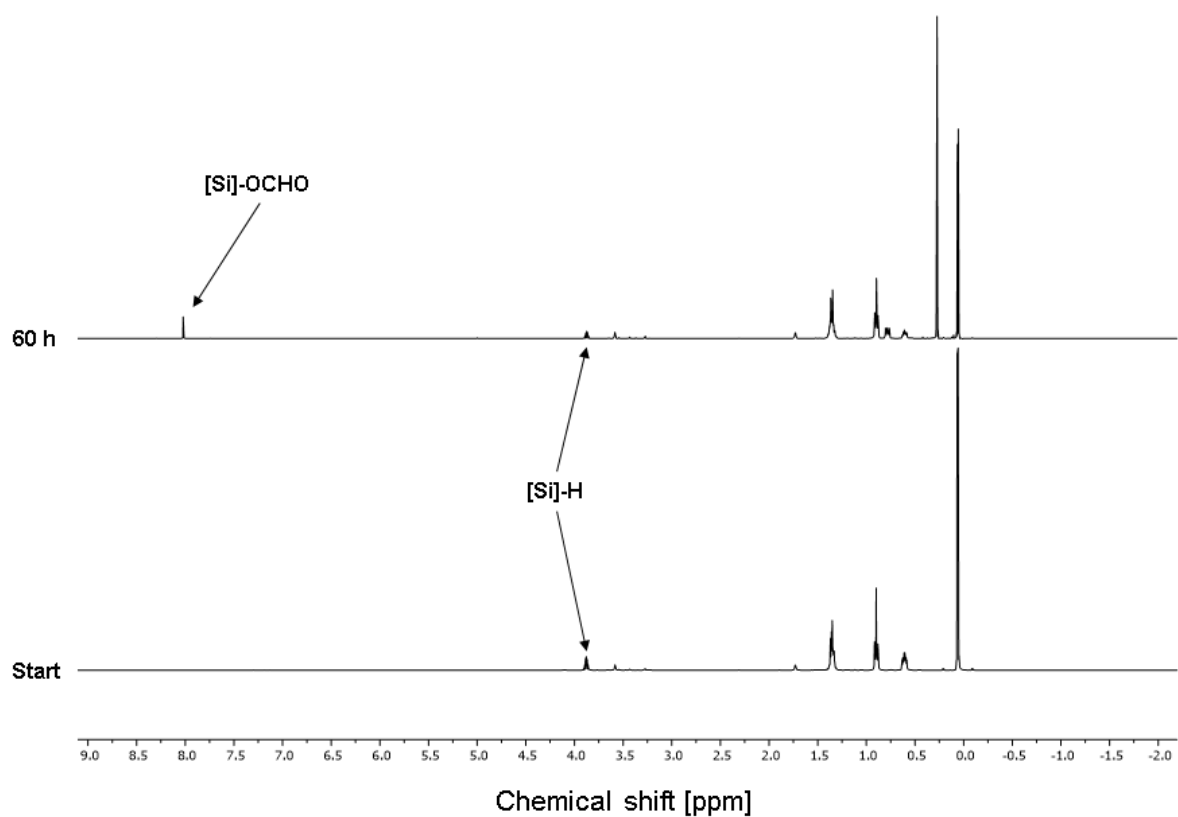

**Figure S127:**  $^1\text{H}$  NMR spectra at the start and after 60 h of the catalytic reaction mixture with  $^n\text{BuMe}_2\text{SiH}$  [ $\text{Zn}(\text{OTf})_2$ ] (10 mol%) as catalyst.

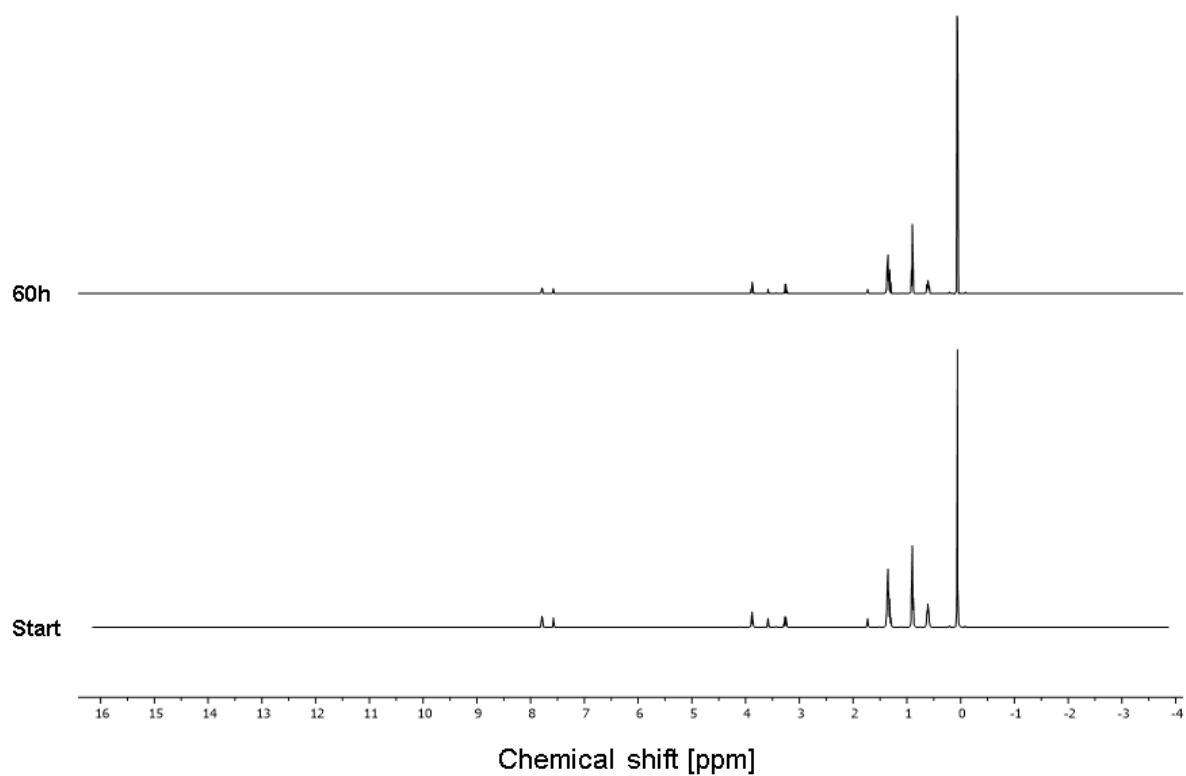

**Figure S128:**  $^1\text{H}$  NMR spectra at the start and after 60 h of the catalytic reaction mixture with  $^n\text{BuMe}_2\text{SiH}$  [ $\text{NEt}_3\text{H}][\text{B}(3,5\text{-CF}_3\text{-C}_6\text{H}_3)_4]$  (10mol%) as catalyst.

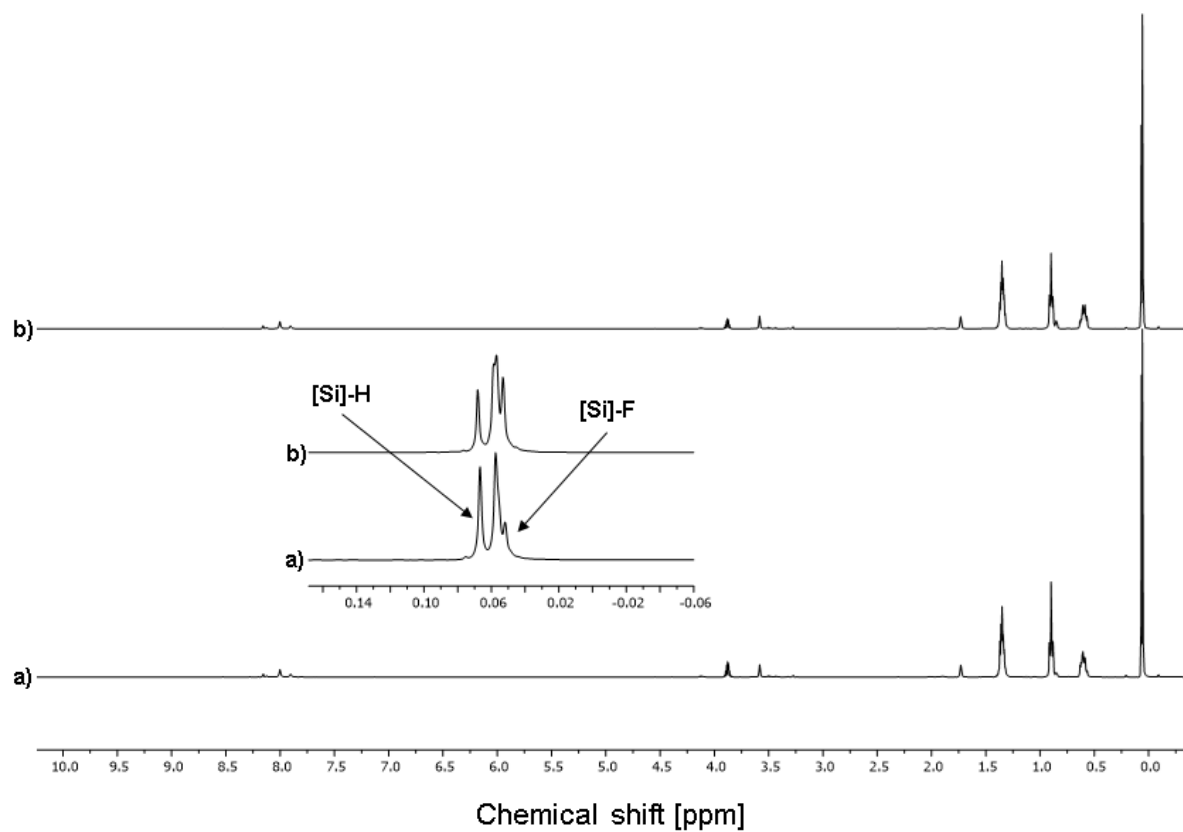

**Figure S 129:**  $^1\text{H}$  NMR spectra of with  $n\text{BuMe}_2\text{SiH}$  and  $\text{B}(3,5\text{-CF}_3\text{-C}_6\text{H}_3)_3$  (10mol%) as catalyst: a) immediately after mixing; b) 20 min after mixing.

## Stoichiometric reaction

Reaction of formate complex **2a** with 1 equiv. of  ${}^n\text{BuMe}_2\text{Si}(\text{OCHO})$ :

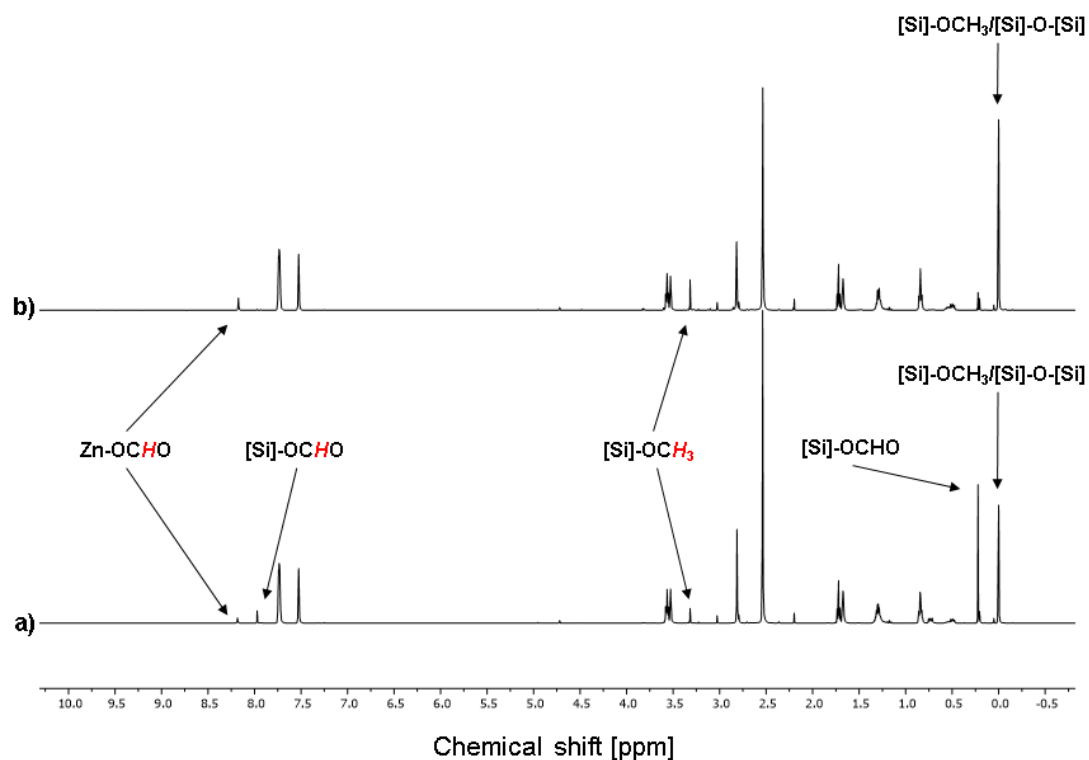

**Figure S130:**  ${}^1\text{H}$  NMR spectra of the reaction of 1 eq. **2a** with 1 equiv. of  ${}^n\text{BuMe}_2\text{Si}(\text{OCHO})$  (a): 10 min after mixing; b): 20 min after mixing) in  $[\text{D}_8]\text{THF}$ .

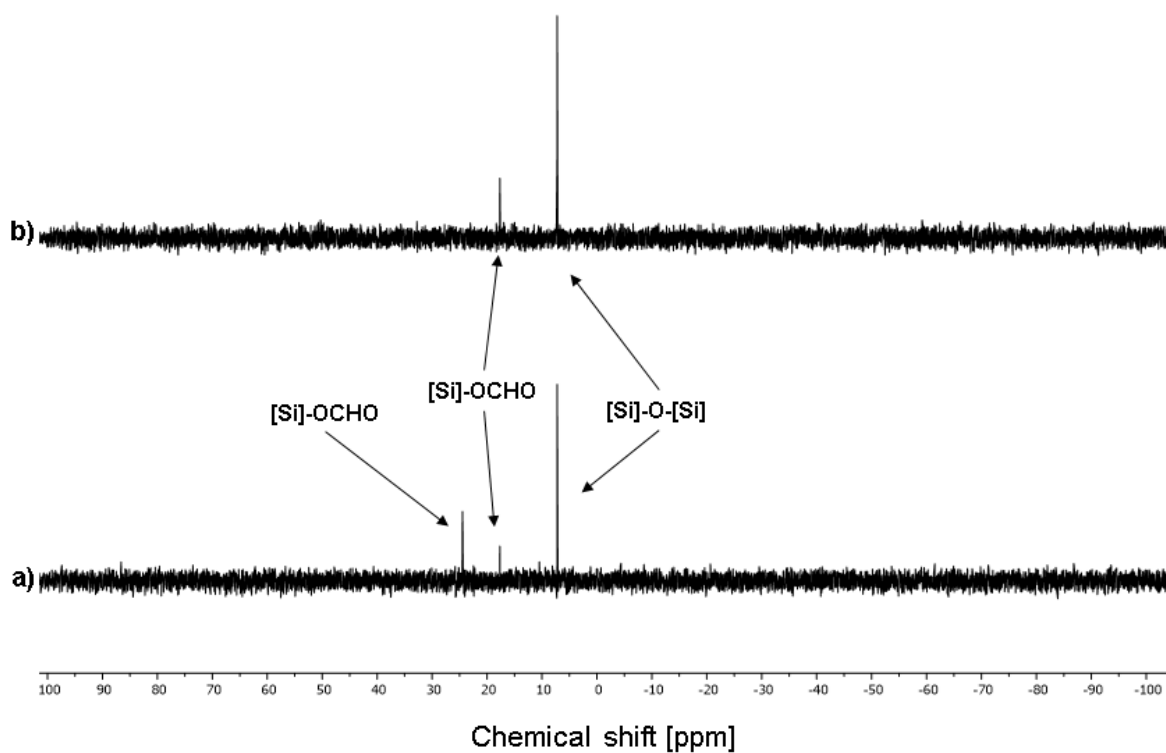

**Figure S131:**  ${}^{29}\text{Si}$  NMR spectra (DEPT 20) of the reaction of 1 equiv. **2a** with 1 equiv. of  ${}^n\text{BuMe}_2\text{SiH}$  (a): 10 min after mixing; b): 20 min after mixing) in  $[\text{D}_8]\text{THF}$ .

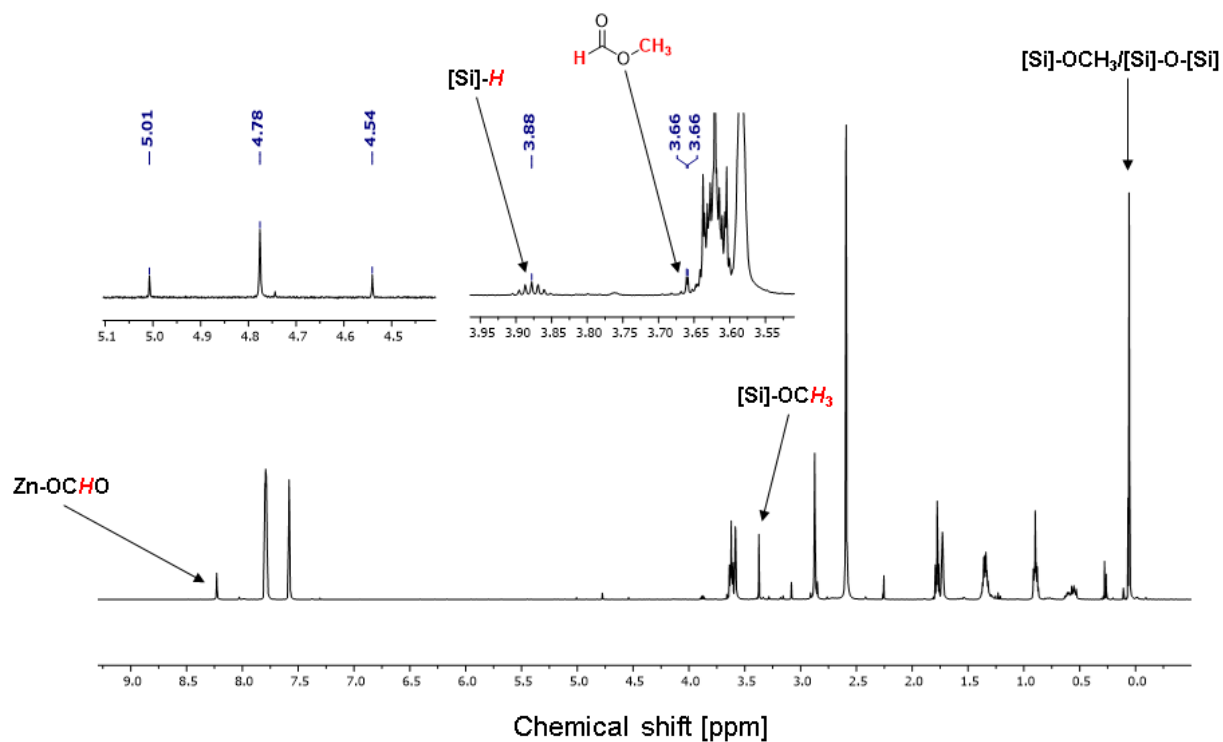

**Figure S132:**  $^1\text{H}$  NMR spectrum of the reaction of 1 equiv. **2a** with 1 equiv. of  $n\text{BuMe}_2\text{SiH}$ : 20 min after mixing in  $[\text{D}_8]\text{THF}$ .

Reaction of **2a** with 1 equiv. of  $n\text{BuMe}_2\text{Si}(\text{OCH}_3)$ :

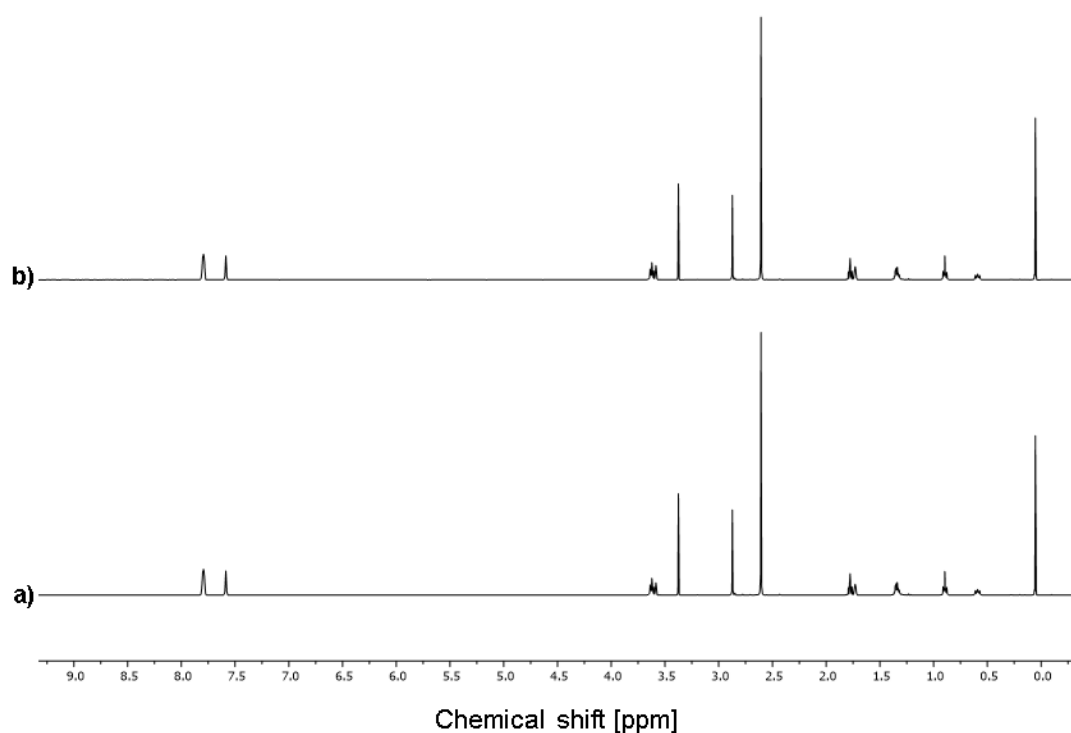

**Figure S133:**  $^1\text{H}$  NMR spectra of  $n\text{BuMe}_2\text{Si}(\text{OCH}_3)$  and **2a** in  $[\text{D}_8]\text{THF}$ ; (a): 10 min after mixing; b): 6 h after mixing.

Reaction of  ${}^n\text{BuMe}_2\text{Si}(\text{OCHO})$  and  ${}^n\text{BuMe}_2\text{Si}(\text{OCH}_3)$  in presence of **2a**:

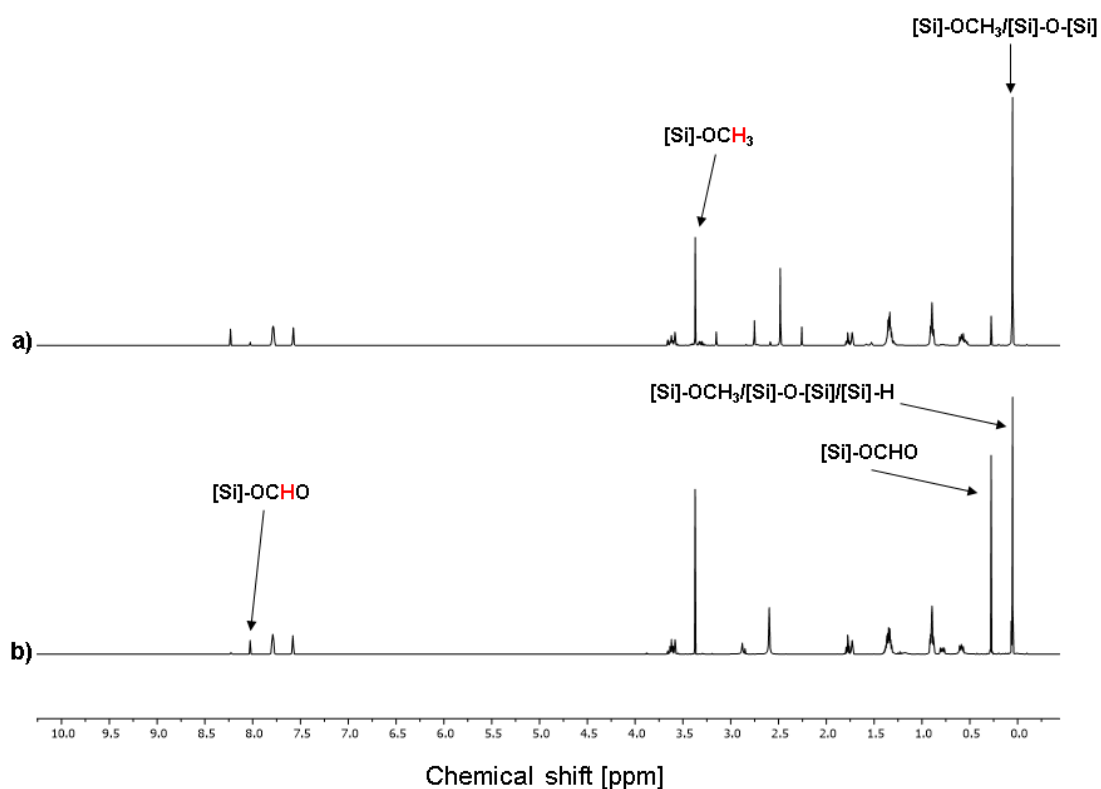

**Figure S134:**  ${}^1\text{H}$  NMR spectra of the reaction of  ${}^n\text{BuMe}_2\text{S}(\text{OCH}_3)$  with  ${}^n\text{BuMe}_2\text{S}(\text{OCHO})$  in the presence of **2a** in  $[\text{D}_8]\text{THF}$ ; (a): 10 min after mixing; b): 24 h at  $70\text{ }^\circ\text{C}$ .

Reaction of  ${}^n\text{BuMe}_2\text{Si}(\text{OCHO})$  and  ${}^n\text{BuMe}_2\text{Si}(\text{OCH}_3)$  in presence of **5a**:

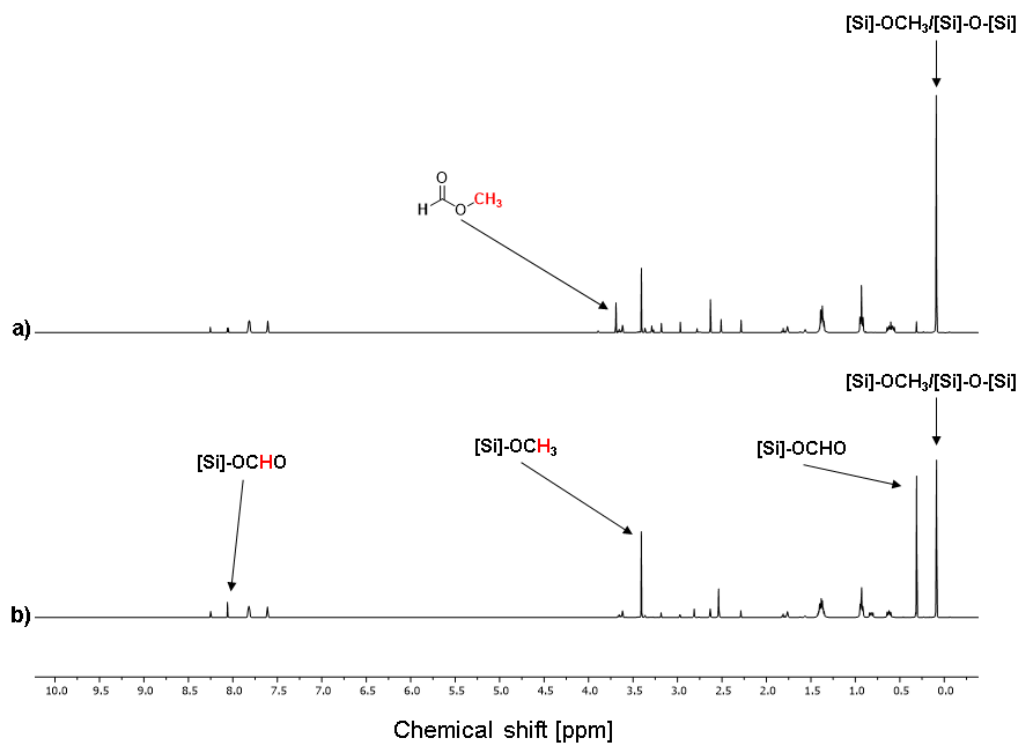

**Figure S135:**  ${}^1\text{H}$  NMR spectra of the reaction of  ${}^n\text{BuMe}_2\text{S}(\text{OCH}_3)$  with  ${}^n\text{BuMe}_2\text{S}(\text{OCHO})$  in the presence of **5a** in  $[\text{D}_8]\text{THF}$ ; (a): 10 min after mixing; b): 3 d at  $70\text{ }^\circ\text{C}$ .

Reaction of  $n\text{BuMe}_2\text{Si}(\text{OCHO})$  and  $n\text{BuMe}_2\text{Si}(\text{OCH}_3)$  without presence of a catalyst:

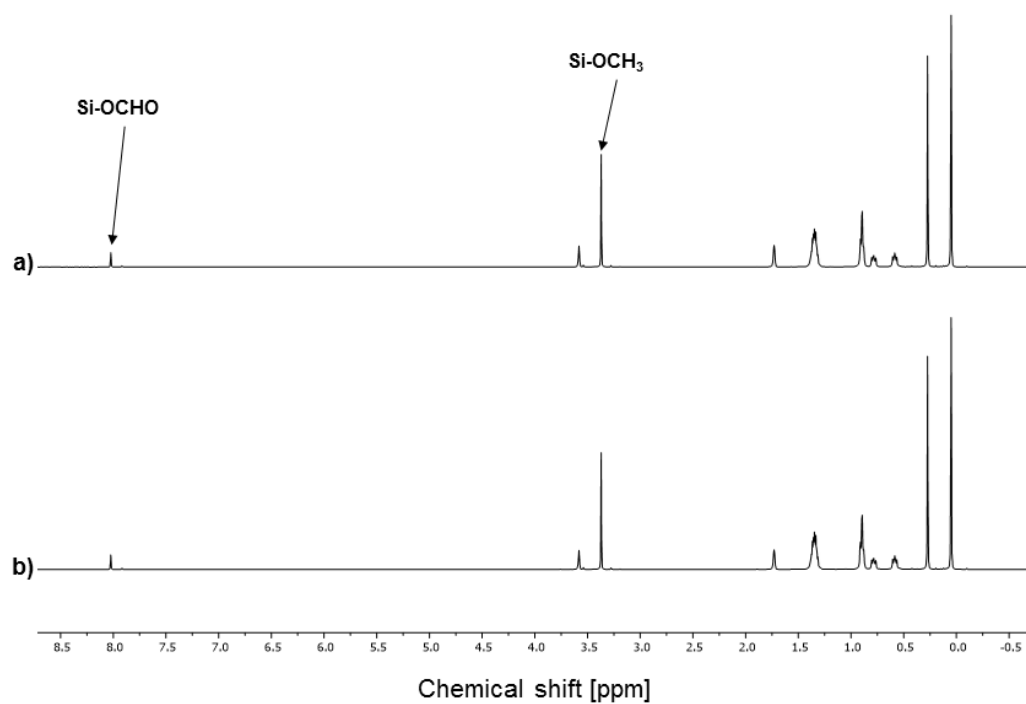

**Figure S136:**  $^1\text{H}$  NMR spectra of  $n\text{BuMe}_2\text{Si}(\text{OCH}_3)$  of  $n\text{BuMe}_2\text{Si}(\text{OCHO})$  in  $[\text{D}_8]\text{THF}$ ; (a): 10 min after mixing; b): 7 d at 70 °C.



## Single Crystal X-ray Diffraction

X-ray diffraction data were collected at 100 K on an Eulerian 4-circle diffractometer STOE STADIVARI in  $\omega$ -scan mode with Cu-K $\alpha$  radiation (**2a**, **2b**, **3a**, **4a**, **4c**, **5a**, **6a**) or with Mo-K $\alpha$  radiation (**7a**). The structures were solved by direct methods using SHELXT<sup>[S9]</sup> and all refinements were carried out against  $F^2$  with SHELXL<sup>[S10]</sup> as implemented in the program system Olex2.<sup>[S11]</sup> The packing of **2b** contains CH<sub>2</sub>Cl<sub>2</sub>, the packing of **3a** contains co-crystallized *n*-hexane, the packing of **4a** contains co-crystallized CH<sub>2</sub>Cl<sub>2</sub>, and the packing of **4c** contains co-crystallized *n*-pentane. The co-crystallized solvent in **6a** could not be modelled reasonably well; in this case the routine “solvent mask” as implied in Olex2 was used. The molecular cation in **2b** shows crystallographic  $\bar{1}$  symmetry, the molecular cation in **6a** shows crystallographic  $C_2$  symmetry with the  $C_2$  axis through the atoms C1 and C2, and the molecule **7a** shows crystallographic  $C_2$  symmetry with the  $C_2$  axis through the metal atom Zn1. The packing of **3a** contains two crystallographically independent molecules, of which one C<sub>12</sub>H<sub>35</sub>N<sub>4</sub>Zn<sub>2</sub> unit is disordered (involving the atoms Zn4, N8, C54 and C55). The disorder was resolved by using split positions, also for the for CF<sub>3</sub> groups involving atoms F22, F23 and F24 in **2a**, F13, F14 and F15 in **2b**, F10, F11, F12 and F13, F14 and F15 in **3a**. Further disorder that was resolved involved the carbon atoms C10 and C11, the fluorine atoms F1, F2, F3, F4, F5, F6, F7, F8, F9, F10, F12, F22, F23, F24, F40, F41, F42, F44, F45 in **4a**, the fluorine atoms F46, F47, F48 in **4c**, as well as the fluorine atoms F22, F23, F24 in **5a** and the carbon atoms C4, C5, C6, C7, C8 in **6a**. The carbon atoms of the co-crystallized solvent molecule *n*-pentane in **4c** (C88 – C91) were also refined with split positions. All non-hydrogen atoms were refined with anisotropic displacement parameters. Only the disordered atoms C54B, C55B, C56B in **3a**, F46, F47, F48 in **4c**, C4, C5, C6, C7, C8 in **6a**, as well as those of the solvent molecule *n*-pentane in **4c** (C88 – C91) were refined with isotropic displacement parameters, because attempted refinement with anisotropic displacement parameters did not lead to physically meaningful values. The reflections 2 0 0, 2 0 2, 2 0 4 and 1 0 4 in **2a**, as well as 1 0 1 in **4a** were omitted from the refinement, because they were most likely affected by the beam stop. The hydrogen atoms were included in calculated positions and treated as riding throughout the refinement. Only the hydride atoms H1 in **2a**, H1 in **2b**, H1, H2 and H3 in **3a**, as well as H1, H2, H3 and H4 in **4a** were located in a Fourier difference map and were refined with isotropic displacement parameters. For the refinement of the anisotropic displacement parameters of the fluorine atoms of disordered CF<sub>3</sub> groups, restraints were used (F13, F14 and F15 in **2b**, F10, F13, F14, F15, F46 and F47 in **3a**, F1, F2, F3, F4, F5, F6, F9, F10, F11, F12, F22, F23, F24, F40, F41, F42, F44, F45 in **4a**). Restraints were also used in the refinement of the anisotropic displacement parameters of Zn4 in **3a**. Distance restraints were employed in the refinement of **3a** (involving the carbon atoms C53, C54, C89, C90, C91, C92, C93 and C94),

in the refinement of **4c** (involving the fluorine atoms F46, F47, F48 and the carbon atoms of the co-crystallized solvent molecule *n*-pentane (C87 – C91)) and in the refinement of **6a** (involving the nitrogen atoms N1, N2 and the carbon atoms C7 and C8). Refinement results are given in Tables S1 – S3. Graphical representations were performed with the program DIAMOND.<sup>[S12]</sup> CCDC 2022679 – 2022686 contain the supplementary crystallographic data for this paper. These data can be obtained free of charge from the Crystallographic Data Centre via [www.ccdc.cam.ac.uk/data\\_request/cif](http://www.ccdc.cam.ac.uk/data_request/cif).

**Table S1.** Crystallographic data of **2a**, **2b** and **3a**.

|                                                                                         | <b>2a</b>                                                                                               | <b>2b</b>                                                                                                                                | <b>3a</b>                                                                                                                                                   |
|-----------------------------------------------------------------------------------------|---------------------------------------------------------------------------------------------------------|------------------------------------------------------------------------------------------------------------------------------------------|-------------------------------------------------------------------------------------------------------------------------------------------------------------|
| formula                                                                                 | C <sub>10</sub> H <sub>25</sub> N <sub>2</sub> OZn,<br>C <sub>32</sub> H <sub>12</sub> BF <sub>24</sub> | C <sub>10</sub> H <sub>25</sub> N <sub>2</sub> Zn,<br>C <sub>32</sub> H <sub>12</sub> BF <sub>24</sub> , CH <sub>2</sub> Cl <sub>2</sub> | 2(C <sub>12</sub> H <sub>35</sub> N <sub>4</sub> Zn <sub>2</sub> ),<br>2(C <sub>32</sub> H <sub>12</sub> BF <sub>24</sub> ), C <sub>6</sub> H <sub>14</sub> |
| <i>F</i> w / g·mol <sup>-1</sup>                                                        | 1117.91                                                                                                 | 1186.84                                                                                                                                  | 2544.98                                                                                                                                                     |
| cryst. color,<br>habit                                                                  | colorless plate                                                                                         | colorless plate                                                                                                                          | colorless block                                                                                                                                             |
| crystal size /<br>mm                                                                    | 0.05 × 0.11 × 0.22                                                                                      | 0.08 × 0.14 × 0.21                                                                                                                       | 0.15 × 0.21 × 0.33                                                                                                                                          |
| crystal system                                                                          | orthorhombic                                                                                            | triclinic                                                                                                                                | triclinic                                                                                                                                                   |
| space group                                                                             | <i>Pbca</i>                                                                                             | <i>P</i> $\bar{1}$                                                                                                                       | <i>P</i> $\bar{1}$                                                                                                                                          |
| <i>a</i> / Å                                                                            | 18.8785(3)                                                                                              | 13.7238(4)                                                                                                                               | 12.6330(2)                                                                                                                                                  |
| <i>b</i> / Å                                                                            | 19.1191(3)                                                                                              | 13.7498(5)                                                                                                                               | 18.7331(4)                                                                                                                                                  |
| <i>c</i> / Å                                                                            | 25.6643(4)                                                                                              | 13.8331(5)                                                                                                                               | 23.7463(4)                                                                                                                                                  |
| $\alpha$ / °                                                                            |                                                                                                         | 79.572(3)                                                                                                                                | 89.246(2)                                                                                                                                                   |
| $\beta$ / °                                                                             |                                                                                                         | 67.574(3)                                                                                                                                | 87.985(2)                                                                                                                                                   |
| $\gamma$ / °                                                                            |                                                                                                         | 85.890(3)                                                                                                                                | 80.892(2)                                                                                                                                                   |
| <i>V</i> / Å <sup>3</sup>                                                               | 926.3(3)                                                                                                | 2373.03(15)                                                                                                                              | 5545.24(18)                                                                                                                                                 |
| <i>Z</i>                                                                                | 8                                                                                                       | 2                                                                                                                                        | 2                                                                                                                                                           |
| <i>d</i> <sub>calc</sub> / Mg·m <sup>-3</sup>                                           | 1.603                                                                                                   | 1.661                                                                                                                                    | 1.524                                                                                                                                                       |
| $\mu$ (CuK $\alpha$ ) /<br>mm <sup>-1</sup>                                             | 1.963                                                                                                   | 2.950                                                                                                                                    | 2.130                                                                                                                                                       |
| <i>F</i> (000)                                                                          | 4496                                                                                                    | 1192                                                                                                                                     | 2580                                                                                                                                                        |
| $\theta$ range / °                                                                      | 4.63, 72.17                                                                                             | 3.48, 72.00                                                                                                                              | 3.55, 71.99                                                                                                                                                 |
| index ranges                                                                            | -23 ≤ <i>h</i> ≤ 15,<br>-22 ≤ <i>k</i> ≤ 19,<br>-31 ≤ <i>l</i> ≤ 26                                     | -16 ≤ <i>h</i> ≤ 16,<br>-16 ≤ <i>k</i> ≤ 16,<br>-17 ≤ <i>l</i> ≤ 12                                                                      | -15 ≤ <i>h</i> ≤ 11,<br>-22 ≤ <i>k</i> ≤ 19,<br>-29 ≤ <i>l</i> ≤ 26                                                                                         |
| refln.                                                                                  | 33170                                                                                                   | 20641                                                                                                                                    | 54441                                                                                                                                                       |
| independ.<br>reflins ( <i>R</i> <sub>int</sub> )                                        | 8754 (0.0401)                                                                                           | 8723 (0.0238)                                                                                                                            | 20267 (0.0186)                                                                                                                                              |
| observed<br>reflins                                                                     | 6570                                                                                                    | 7291                                                                                                                                     | 15543                                                                                                                                                       |
| data/ restr./<br>param.                                                                 | 8754 / 0 / 677                                                                                          | 8723 / 42 / 693                                                                                                                          | 20267 / 77 / 1549                                                                                                                                           |
| <i>R</i> <sub>1</sub> , <i>wR</i> <sub>2</sub><br>[ <i>I</i> > 2 $\sigma$ ( <i>I</i> )] | 0.0558, 0.1508                                                                                          | 0.0547, 0.1416                                                                                                                           | 0.0546, 0.1515                                                                                                                                              |
| <i>R</i> <sub>1</sub> , <i>wR</i> <sub>2</sub><br>(all data)                            | 0.0720, 0.1604                                                                                          | 0.0658, 0.1512                                                                                                                           | 0.0682, 0.1574                                                                                                                                              |
| GooF on <i>F</i> <sup>2</sup>                                                           | 1.019                                                                                                   | 1.049                                                                                                                                    | 1.078                                                                                                                                                       |
| largest diff.<br>peak, hole /<br>e·Å <sup>3</sup>                                       | 0.980, -0.795                                                                                           | 0.647, -0.960                                                                                                                            | 2.287, -1.089                                                                                                                                               |
| CCDC number                                                                             | 2022679                                                                                                 | 2022680                                                                                                                                  | 2022681                                                                                                                                                     |

**Table S2.** Crystallographic data of **4a**, **4c** and **5a**.

|                                                                                         | <b>4a</b>                                                                                                                                                    | <b>4c</b>                                                                                                                                                      | <b>5a</b>                                                                                                                           |
|-----------------------------------------------------------------------------------------|--------------------------------------------------------------------------------------------------------------------------------------------------------------|----------------------------------------------------------------------------------------------------------------------------------------------------------------|-------------------------------------------------------------------------------------------------------------------------------------|
| formula                                                                                 | C <sub>18</sub> H <sub>52</sub> N <sub>6</sub> Zn <sub>3</sub> ,<br>2(C <sub>32</sub> H <sub>12</sub> BF <sub>24</sub> ),<br>CH <sub>2</sub> Cl <sub>2</sub> | 2(C <sub>22</sub> H <sub>56</sub> N <sub>6</sub> Zn <sub>3</sub> ),<br>4(C <sub>32</sub> H <sub>12</sub> BF <sub>24</sub> ),<br>C <sub>5</sub> H <sub>12</sub> | C <sub>15</sub> H <sub>35</sub> N <sub>4</sub> O <sub>6</sub> Zn <sub>2</sub> ,<br>C <sub>32</sub> H <sub>12</sub> BF <sub>24</sub> |
| <i>F</i> <sub>w</sub> /g·mol <sup>-1</sup>                                              | 2360.14                                                                                                                                                      | 4726.72                                                                                                                                                        | 1361.43                                                                                                                             |
| cryst. color,<br>habit                                                                  | colorless plate                                                                                                                                              | colorless plate                                                                                                                                                | colorless plate                                                                                                                     |
| crystal size /<br>mm                                                                    | 0.04 × 0.18 × 0.34                                                                                                                                           | 0.07 × 0.28 × 0.45                                                                                                                                             | 0.04 × 0.16 × 0.33                                                                                                                  |
| crystal system                                                                          | triclinic                                                                                                                                                    | triclinic                                                                                                                                                      | triclinic                                                                                                                           |
| space group                                                                             | <i>P</i> $\bar{1}$                                                                                                                                           | <i>P</i> $\bar{1}$                                                                                                                                             | <i>P</i> $\bar{1}$                                                                                                                  |
| <i>a</i> / Å                                                                            | 13.6357(4)                                                                                                                                                   | 12.6823(12)                                                                                                                                                    | 10.4089(3)                                                                                                                          |
| <i>b</i> / Å                                                                            | 17.9663(4)                                                                                                                                                   | 17.7306(16)                                                                                                                                                    | 16.4176(4)                                                                                                                          |
| <i>c</i> / Å                                                                            | 21.9342(5)                                                                                                                                                   | 23.497(3)                                                                                                                                                      | 16.7899(4)                                                                                                                          |
| $\alpha$ / °                                                                            | 71.9835(17)                                                                                                                                                  | 96.087(8)                                                                                                                                                      | 75.5669(19)                                                                                                                         |
| $\beta$ / °                                                                             | 76.0546(19)                                                                                                                                                  | 91.887(9)                                                                                                                                                      | 82.161(2)                                                                                                                           |
| $\gamma$ / °                                                                            | 71.3749(18)                                                                                                                                                  | 103.611(7)                                                                                                                                                     | 89.192(2)                                                                                                                           |
| <i>V</i> / Å <sup>3</sup>                                                               | 4781.7(2)                                                                                                                                                    | 5097.1(9)                                                                                                                                                      | 2752.10(13)                                                                                                                         |
| <i>Z</i>                                                                                | 2                                                                                                                                                            | 1                                                                                                                                                              | 2                                                                                                                                   |
| <i>d</i> <sub>calc</sub> / Mg·m <sup>-3</sup>                                           | 1.639                                                                                                                                                        | 1.540                                                                                                                                                          | 1.643                                                                                                                               |
| $\mu$ (CuK $\alpha$ ) /<br>mm <sup>-1</sup>                                             | 2.672                                                                                                                                                        | 2.037                                                                                                                                                          | 2.278                                                                                                                               |
| <i>F</i> (000)                                                                          | 2368                                                                                                                                                         | 2382                                                                                                                                                           | 1372                                                                                                                                |
| $\theta$ range / °                                                                      | 2.15, 72.09                                                                                                                                                  | 2.58, 71.41                                                                                                                                                    | 2.64, 71.89                                                                                                                         |
| index ranges                                                                            | -16 ≤ <i>h</i> ≤ 12,<br>-22 ≤ <i>k</i> ≤ 21,<br>-27 ≤ <i>l</i> ≤ 26                                                                                          | -15 ≤ <i>h</i> ≤ 15,<br>-16 ≤ <i>k</i> ≤ 20,<br>-28 ≤ <i>l</i> ≤ 27                                                                                            | -9 ≤ <i>h</i> ≤ 12,<br>-19 ≤ <i>k</i> ≤ 20,<br>-20 ≤ <i>l</i> ≤ 20                                                                  |
| refln.                                                                                  | 50574                                                                                                                                                        | 42734                                                                                                                                                          | 24803                                                                                                                               |
| Independ.<br>reflns ( <i>R</i> <sub>int</sub> )                                         | 17716 (0.0490)                                                                                                                                               | 18149 (0.0223)                                                                                                                                                 | 10009 (0.0175)                                                                                                                      |
| observed<br>reflns                                                                      | 10530                                                                                                                                                        | 14082                                                                                                                                                          | 8299                                                                                                                                |
| data/ restr./<br>param.                                                                 | 17716 / 198 /<br>1528                                                                                                                                        | 18149 / 37 / 1346                                                                                                                                              | 10009 / 0 / 793                                                                                                                     |
| <i>R</i> <sub>1</sub> , <i>wR</i> <sub>2</sub><br>[ <i>I</i> > 2 $\sigma$ ( <i>I</i> )] | 0.0376, 0.0751                                                                                                                                               | 0.0779, 0.2149                                                                                                                                                 | 0.0439, 0.1206                                                                                                                      |
| <i>R</i> <sub>1</sub> , <i>wR</i> <sub>2</sub><br>(all data)                            | 0.0691, 0.0796                                                                                                                                               | 0.0946, 0.2277                                                                                                                                                 | 0.0520, 0.1243                                                                                                                      |
| GooF on <i>F</i> <sup>2</sup>                                                           | 0.784                                                                                                                                                        | 1.076                                                                                                                                                          | 1.098                                                                                                                               |
| largest diff.<br>peak, hole /<br>e·Å <sup>3</sup>                                       | 0.511, -0.543                                                                                                                                                | 2.140, -1.125                                                                                                                                                  | 0.910, -0.762                                                                                                                       |
| CCDC number                                                                             | 2022682                                                                                                                                                      | 2022683                                                                                                                                                        | 2022684                                                                                                                             |

**Table S3.** Crystallographic data of **6a** and **7a**.

|                                                                             | <b>6a</b>                                                                                                                                               | <b>7a</b>                                                                    |
|-----------------------------------------------------------------------------|---------------------------------------------------------------------------------------------------------------------------------------------------------|------------------------------------------------------------------------------|
| Formula                                                                     | 0.5(C <sub>14</sub> H <sub>34</sub> N <sub>4</sub> O <sub>4</sub> Zn <sub>2</sub> ),<br>C <sub>32</sub> H <sub>12</sub> BF <sub>24</sub><br>[+ solvent] | C <sub>8</sub> H <sub>18</sub> N <sub>2</sub> O <sub>4</sub> Zn <sub>3</sub> |
| <i>F</i> <sub>w</sub> / g·mol <sup>-1</sup>                                 | 1089.92                                                                                                                                                 | 271.61                                                                       |
| cryst. color, habit                                                         | colorless rod                                                                                                                                           | colorless plate                                                              |
| crystal size / mm                                                           | 0.05 × 0.14 × 0.29                                                                                                                                      | 0.05 × 0.11 × 0.19                                                           |
| crystal system                                                              | monoclinic                                                                                                                                              | monoclinic                                                                   |
| space group                                                                 | <i>C2/c</i>                                                                                                                                             | <i>C2/c</i>                                                                  |
| <i>a</i> / Å                                                                | 24.289(5)                                                                                                                                               | 14.6808(19)                                                                  |
| <i>b</i> / Å                                                                | 14.3638(6)                                                                                                                                              | 7.1067(6)                                                                    |
| <i>c</i> / Å                                                                | 28.4787(6)                                                                                                                                              | 12.0225(16)                                                                  |
| β / °                                                                       | 92.8825(18)                                                                                                                                             | 109.443(10)                                                                  |
| <i>V</i> / Å <sup>3</sup>                                                   | 9923(3)                                                                                                                                                 | 1182.8(3)                                                                    |
| <i>Z</i>                                                                    | 8                                                                                                                                                       | 4                                                                            |
| <i>d</i> <sub>calc</sub> / Mg·m <sup>-3</sup>                               | 1.459                                                                                                                                                   | 1.525                                                                        |
| μ(CuKα) / mm <sup>-1</sup>                                                  | 1.835                                                                                                                                                   |                                                                              |
| μ(MoKα) / mm <sup>-1</sup>                                                  |                                                                                                                                                         | 2.074                                                                        |
| <i>F</i> (000)                                                              | 4352                                                                                                                                                    | 568                                                                          |
| θ range / °                                                                 | 3.11, 72.02                                                                                                                                             | 2.94, 30.42                                                                  |
| index ranges                                                                | -29 ≤ <i>h</i> ≤ 29,<br>-17 ≤ <i>k</i> ≤ 13,<br>-35 ≤ <i>l</i> ≤ 34                                                                                     | -20 ≤ <i>h</i> ≤ 17,<br>-9 ≤ <i>k</i> ≤ 9,<br>-15 ≤ <i>l</i> ≤ 16            |
| refln.                                                                      | 48330                                                                                                                                                   | 4076                                                                         |
| Independ. reflns ( <i>R</i> <sub>int</sub> )                                | 9500 (0.0297)                                                                                                                                           | 1600 (0.0672)                                                                |
| observed reflns                                                             | 5854                                                                                                                                                    | 857                                                                          |
| data/ restr./ param.                                                        | 9500 / 6 / 622                                                                                                                                          | 1600 / 0 / 71                                                                |
| <i>R</i> <sub>1</sub> , <i>wR</i> <sub>2</sub> [ <i>I</i> > 2σ( <i>I</i> )] | 0.0638, 0.1873                                                                                                                                          | 0.0614, 0.1386                                                               |
| <i>R</i> <sub>1</sub> , <i>wR</i> <sub>2</sub> (all data)                   | 0.0902, 0.1980                                                                                                                                          | 0.1087, 0.1499                                                               |
| Goof on <i>F</i> <sup>2</sup>                                               | 1.05                                                                                                                                                    | 0.863                                                                        |
| largest diff. peak, hole / e·Å <sup>3</sup>                                 | 1.210, -0.878                                                                                                                                           | 0.849, -1.276                                                                |
| CCDC number                                                                 | 2022685                                                                                                                                                 | 2022686                                                                      |

## DFT Calculations

**Computational details:** Zinc was treated with a Stuttgart–Dresden pseudopotential in combination with their adapted basis set.<sup>[S13]</sup> The basis set has been augmented by a set of polarization functions (*f* for Zn).<sup>[S14]</sup> All other atoms have been described with a 6–31G(d,p) double- $\zeta$  basis set.<sup>[S15]</sup> Calculations were carried out at the DFT level of theory using the hybrid functional B3PW91.<sup>[S16,S17]</sup> Geometry optimizations were carried out without any symmetry restrictions, the nature of the extrema (minimum) was verified with analytical frequency calculations. All these computations have been performed with the Gaussian 09<sup>[S18]</sup> suite of programs. The bonding situation was analyzed using the NBO technique.<sup>[S19]</sup>

### [(TMEDA)ZnH(thf)]<sup>+</sup>

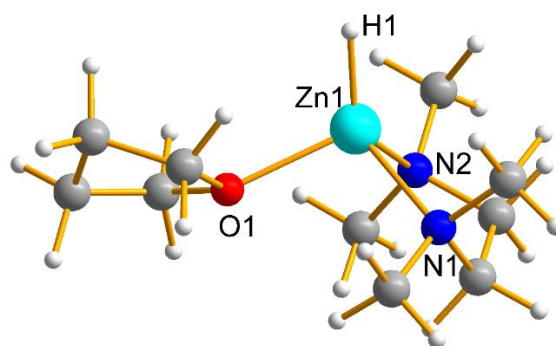

**Figure S137:** DIAMOND representation of the optimized molecular structure of [(TMEDA)ZnH(thf)]<sup>+</sup>.

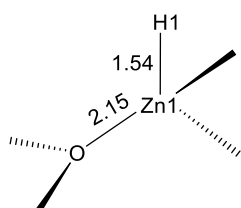

**Natural Charge:** Zn = 1.00  
H = -0.39

**Wiberg Bond Index:** Zn1–H1: 0.77

**Bond:** (1.86963) BD(1) Zn1–H1

(25.52%) 0.5051\*Zn1 s(38.53%)p1.53(58.77%)d0.07(2.70%)f0.00(0.00%)  
(74.48%) 0.8630\*H1 s(99.98%)p0.00(0.02%)

### Analysis of the Bonding:

This is a classical terminal Zn–H bond as found in the two species presented below; Wiberg bond indices and bond description are similar (see below).

## Optimized Molecular Coordinates

39

ZnC<sub>10</sub>N<sub>2</sub>H<sub>25</sub>O

|     |              |              |              |
|-----|--------------|--------------|--------------|
| Zn1 | 12.685256000 | 16.027308000 | 14.085514000 |
| O1  | 13.983852000 | 17.490842000 | 14.973146000 |
| N1  | 12.098397000 | 14.904403000 | 15.826862000 |
| N2  | 10.659244000 | 16.771158000 | 14.084535000 |
| C1  | 15.371290000 | 17.034615000 | 15.057001000 |
| C2  | 13.958536000 | 18.906963000 | 14.630808000 |
| C3  | 10.752106000 | 15.421711000 | 16.169726000 |
| C4  | 13.007069000 | 15.039875000 | 16.982637000 |
| C5  | 12.034342000 | 13.481237000 | 15.424661000 |
| C6  | 9.954238000  | 15.766054000 | 14.919252000 |
| C7  | 10.145781000 | 16.730676000 | 12.696366000 |
| C8  | 10.466101000 | 18.129493000 | 14.630098000 |
| C9  | 16.205604000 | 18.161411000 | 14.470382000 |
| C10 | 15.382628000 | 19.397674000 | 14.838499000 |
| H1  | 13.367513000 | 15.423531000 | 12.839856000 |
| H2  | 15.450448000 | 16.095040000 | 14.503219000 |
| H3  | 15.597854000 | 16.860766000 | 16.114316000 |
| H4  | 13.225314000 | 19.393542000 | 15.278156000 |
| H5  | 13.647844000 | 19.007108000 | 13.583858000 |
| H6  | 10.885584000 | 16.312648000 | 16.790784000 |
| H7  | 10.197263000 | 14.691068000 | 16.774832000 |
| H8  | 13.986625000 | 14.632655000 | 16.723174000 |
| H9  | 12.623692000 | 14.491476000 | 17.853231000 |
| H10 | 13.121125000 | 16.094115000 | 17.242670000 |
| H11 | 11.368965000 | 13.351021000 | 14.569143000 |
| H12 | 11.675039000 | 12.857576000 | 16.254015000 |
| H13 | 13.028740000 | 13.143008000 | 15.126962000 |
| H14 | 9.805923000  | 14.870779000 | 14.307956000 |
| H15 | 8.955626000  | 16.128606000 | 15.200091000 |
| H16 | 10.669658000 | 17.474398000 | 12.092492000 |
| H17 | 9.069541000  | 16.945475000 | 12.667951000 |
| H18 | 10.328737000 | 15.746249000 | 12.260426000 |
| H19 | 10.850273000 | 18.196837000 | 15.649818000 |
| H20 | 9.401395000  | 18.399055000 | 14.637627000 |
| H21 | 11.000288000 | 18.851040000 | 14.009261000 |
| H22 | 17.216497000 | 18.179740000 | 14.883840000 |
| H23 | 16.282991000 | 18.056548000 | 13.383370000 |
| H24 | 15.545141000 | 19.674436000 | 15.885232000 |
| H25 | 15.610297000 | 20.267082000 | 14.217443000 |

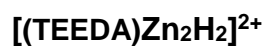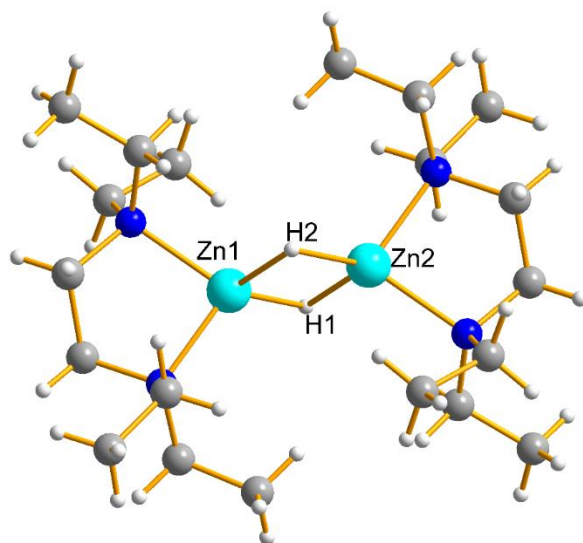

**Figure S138:** DIAMOND representation of the optimized molecular structure of  $[(\text{TEEDA})\text{Zn}_2\text{H}_2]^{2+}$ .

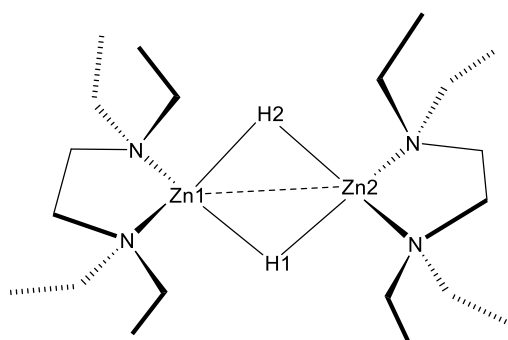

**Natural Charge:**

Zn1 = 0.91761  
Zn2 = 0.91761  
H1 = -0.36259  
H2 = -0.36259

**Natural Electron Configuration:**

Zn1 [core]4s(0.49)3d(9.97)4p(0.58)5s(0.01)4d(0.01)5p(0.01)5d(0.01)  
Zn2 [core]4s(0.49)3d(9.97)4p(0.58)5s(0.01)4d(0.01)5p(0.01)5d(0.01)

**Wiberg Bond Indices:**

Zn1–Zn2: 0.2829  
Zn1–H1: 0.3904  
Zn1–H2: 0.3846  
Zn2–H1: 0.3846  
Zn2–H2: 0.3846  
Zn1: 1.8583  
Zn2: 1.8584  
H1: 0.8720  
H2: 0.8720



**Bond:****1. (1.65185) BD(1) Zn2–H1**

(18.26%) Zn2 s(32.49%)p2.02(65.73%)d0.05(1.77%)f0.00(0.00%)  
(81.74%) H1 s(99.98%)p0.00(0.02%)

**2. (1.65720) BD(1) Zn2–H2**

(18.60%) Zn2 s(35.16%)p1.79(62.97%) d0.05(1.87%)f0.00(0.00%)  
(81.40%) H2 s(99.98%)p0.00(0.02%)

**Donation:**

|                                        |                 |
|----------------------------------------|-----------------|
| Donation from s orbitals Zn1 → Zn2:    | 9,02 kcal/mol   |
| Donation from s orbitals of Zn2 → Zn1: | 33,8 kcal/mol   |
| Donation from d orbitals of Zn2 → Zn1: | 2,74 kcal/mol   |
| Donation from the bond Zn2–H1 → Zn1:   | 283,91 kcal/mol |
| Donation from the bond Zn2–H2 → Zn1:   | 266,48 kcal/mol |

**Optimized Molecular Coordinates**

76

C<sub>20</sub>H<sub>50</sub>N<sub>4</sub>Zn<sub>2</sub>

|     |          |          |          |
|-----|----------|----------|----------|
| Zn1 | 13.77827 | 12.95281 | 0.20210  |
| Zn2 | 15.64070 | 14.47647 | -0.20210 |
| N1  | 11.73827 | 13.16377 | 0.20550  |
| N2  | 13.55915 | 10.90184 | 0.23324  |
| N3  | 17.68070 | 14.26551 | -0.20550 |
| N4  | 15.85982 | 16.52744 | -0.23324 |
| C1  | 11.30515 | 11.81773 | 0.70476  |
| C2  | 11.31336 | 13.40716 | -1.21033 |
| C3  | 11.17130 | 14.19353 | 1.13720  |
| C4  | 14.32291 | 10.26631 | -0.89514 |
| C5  | 12.08335 | 10.70665 | 0.03026  |
| C6  | 13.94524 | 10.30214 | 1.55578  |
| C7  | 18.11382 | 15.61154 | -0.70476 |
| C8  | 18.10561 | 14.02212 | 1.21033  |
| C9  | 18.24766 | 13.23575 | -1.13720 |
| C10 | 15.09606 | 17.16297 | 0.89514  |
| C11 | 17.33562 | 16.72263 | -0.03026 |
| C12 | 15.47373 | 17.12714 | -1.55578 |
| C13 | 9.82142  | 13.35100 | -1.47761 |
| C14 | 11.55618 | 15.60680 | 0.78419  |
| C15 | 13.95529 | 8.81708  | -1.20907 |
| C16 | 15.32498 | 10.69973 | 2.03360  |
| C17 | 19.59755 | 14.07827 | 1.47761  |
| C18 | 17.86279 | 11.82247 | -0.78419 |
| C19 | 15.46368 | 18.61219 | 1.20907  |
| C20 | 14.09399 | 16.72955 | -2.03360 |
| H1  | 14.84034 | 14.03522 | 1.65285  |
| H2  | 14.57863 | 13.39406 | -1.65285 |
| H3  | 10.35854 | 11.69917 | 0.53078  |
| H4  | 11.44058 | 11.77010 | 1.66420  |
| H5  | 11.74972 | 12.75053 | -1.77641 |
| H6  | 11.63761 | 14.28201 | -1.47887 |
| H7  | 11.47454 | 14.00169 | 2.03865  |
| H8  | 10.20296 | 14.12252 | 1.13090  |
| H9  | 15.26752 | 10.30327 | -0.68459 |
| H10 | 14.18112 | 10.79749 | -1.69572 |

|     |          |          |          |
|-----|----------|----------|----------|
| H11 | 11.81515 | 9.85022  | 0.39966  |
| H12 | 11.88497 | 10.69975 | -0.91909 |
| H13 | 13.90780 | 9.33523  | 1.48265  |
| H14 | 13.29569 | 10.57261 | 2.22272  |
| H15 | 19.06042 | 15.73010 | -0.53078 |
| H16 | 17.97839 | 15.65917 | -1.66420 |
| H17 | 17.66925 | 14.67875 | 1.77641  |
| H18 | 17.78136 | 13.14726 | 1.47887  |
| H19 | 17.94443 | 13.42759 | -2.03865 |
| H20 | 19.21601 | 13.30676 | -1.13090 |
| H21 | 14.15144 | 17.12600 | 0.68459  |
| H22 | 15.23785 | 16.63178 | 1.69572  |
| H23 | 17.60382 | 17.57906 | -0.39966 |
| H24 | 17.53399 | 16.72952 | 0.91909  |
| H25 | 15.51117 | 18.09404 | -1.48265 |
| H26 | 16.12328 | 16.85667 | -2.22272 |
| H27 | 9.65502  | 13.53425 | -2.40553 |
| H28 | 9.37460  | 14.00474 | -0.93674 |
| H29 | 9.49121  | 12.47564 | -1.26076 |
| H30 | 11.16026 | 15.84727 | -0.05673 |
| H31 | 12.51214 | 15.67094 | 0.71737  |
| H32 | 11.24289 | 16.20508 | 1.46752  |
| H33 | 14.52924 | 8.48454  | -1.90248 |
| H34 | 13.04146 | 8.77449  | -1.50156 |
| H35 | 14.06384 | 8.28145  | -0.41857 |
| H36 | 15.98276 | 10.39429 | 1.40322  |
| H37 | 15.49464 | 10.29998 | 2.88966  |
| H38 | 15.37410 | 11.65492 | 2.11051  |
| H39 | 19.76395 | 13.89503 | 2.40553  |
| H40 | 20.04437 | 13.42454 | 0.93674  |
| H41 | 19.92776 | 14.95364 | 1.26076  |
| H42 | 18.25871 | 11.58200 | 0.05673  |
| H43 | 16.90682 | 11.75834 | -0.71737 |
| H44 | 18.17608 | 11.22420 | -1.46752 |
| H45 | 14.88973 | 18.94474 | 1.90248  |
| H46 | 16.37751 | 18.65479 | 1.50156  |
| H47 | 15.35513 | 19.14783 | 0.41857  |
| H48 | 13.43620 | 17.03499 | -1.40322 |
| H49 | 13.92433 | 17.12930 | -2.88966 |
| H50 | 14.04487 | 15.77436 | -2.11051 |

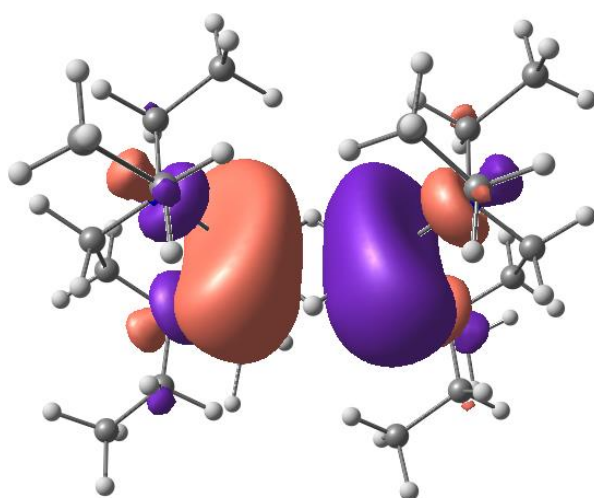

**LUMO, E = -0.2414**

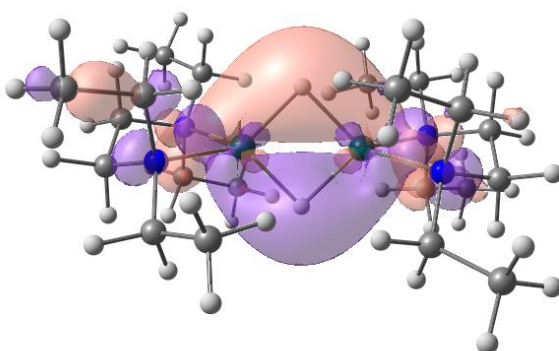

**HOMO-1, E = -0.4921**

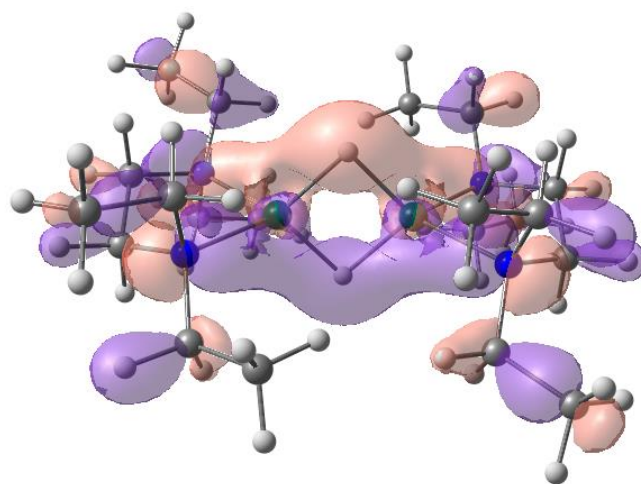

**HOMO<sub>-2</sub>, E = -0.4948**

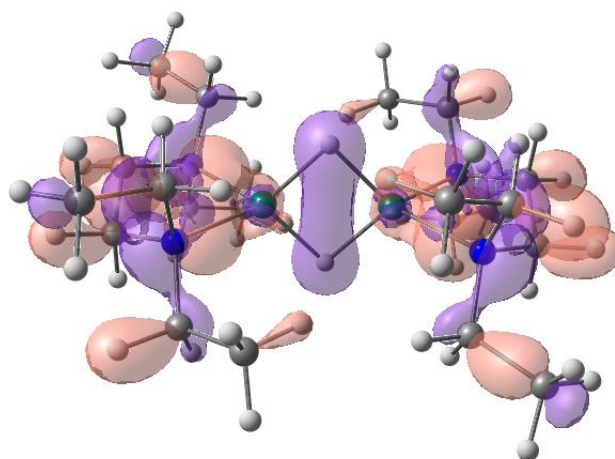

**HOMO<sub>-3</sub>, E = -0.5082**

The HOMO is not shown because it involves mainly the interaction between the metal centers and the ligands TEEDA.

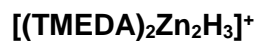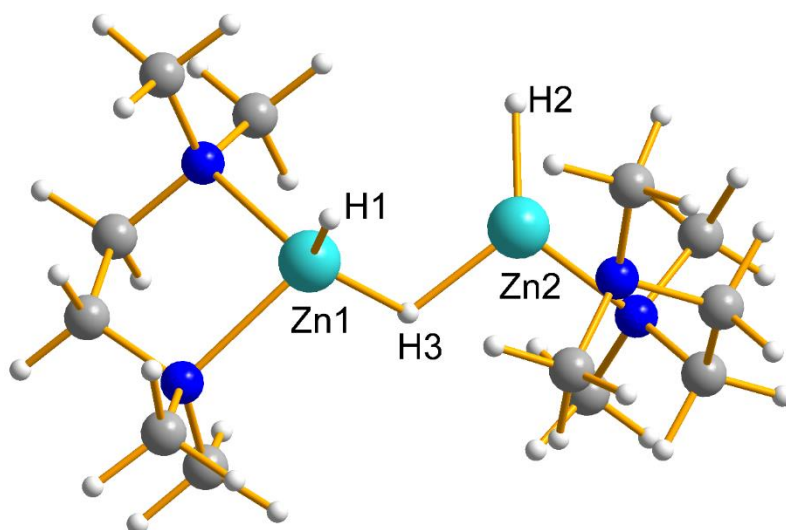

Figure S139: DIAMOND representation of the optimized molecular structure of  $[(\text{TMEDA})_2\text{Zn}_2\text{H}_3]^+$ .

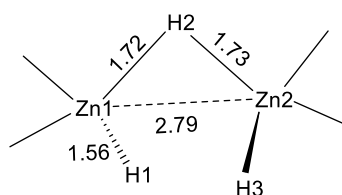

**Natural Charge:**

|      |       |
|------|-------|
| Zn1: | 0.76  |
| Zn2: | 0.76  |
| H1:  | -0.36 |
| H2:  | -0.40 |
| H3:  | -0.36 |

**Wiberg Bond Indices:**

|         |      |
|---------|------|
| Zn1-H1: | 0.76 |
| Zn1-H2: | 0.37 |
| Zn2-H2: | 0.37 |
| Zn2-H3: | 0.76 |

**Bond:**

(1.89755) BD(1) Zn1-H1  
(28.71%) 0.5358\*Zn1 s(43.09%)p1.29(55.39%)d0.04(1.52%)f0.00(0.00%)  
(71.29%) 0.8444\*H1 s(99.98%)p0.00(0.02%)

(1.90166) BD(1) Zn2-H3  
(28.87%) 0.5373\*Zn2 s(43.84%) p1.25(54.59%)d0.04(1.57%)f0.00(0.00%)  
(71.13%) 0.8434\*H3 s(99.98%)p0.00(0.02%)

### Second Order Study:

Donation from lone pair of the bridging H2 to an empty *sp* orbital (7.6%*s*, 91.3%*p*) at Zn1:  
81.98 kcal/mol

Donation from lone pair of the bridging H2 to an empty *sp* orbital (7.6%*s*, 91.3%*p*) at Zn2:  
79.18 kcal/mol

### Analysis of the Bonding:

Donation from the *s* lone pair of the bridging H2 to the empty *sp* orbitals of Zn1 and Zn2 leads to a 3c-2e bond between Zn1–H2–Zn2. In line with a 3c-2e bond, the Wiberg bond indices of 0.37 correspond to half of that of a normal 2c-2e Zn–H bond.

### Optimized Structure

53

Zn<sub>2</sub>C<sub>12</sub>N<sub>4</sub>H<sub>35</sub>

|     |              |              |              |
|-----|--------------|--------------|--------------|
| Zn1 | 2.223870000  | 0.004002000  | 14.511442000 |
| Zn2 | -0.038889000 | -1.433080000 | 15.318682000 |
| N1  | 4.272935000  | 0.324455000  | 15.187741000 |
| N2  | 1.900508000  | 2.052461000  | 15.170133000 |
| N3  | -0.556291000 | -2.880354000 | 16.876005000 |
| N4  | 0.056049000  | -3.167495000 | 14.020782000 |
| C1  | 4.373963000  | 1.800822000  | 15.225822000 |
| C2  | 4.546765000  | -0.265434000 | 16.509786000 |
| C3  | 5.221956000  | -0.223953000 | 14.199631000 |
| C4  | 3.147557000  | 2.433332000  | 15.870522000 |
| C5  | 0.738136000  | 2.230560000  | 16.060958000 |
| C6  | 1.703976000  | 2.866867000  | 13.952487000 |
| C7  | -0.331898000 | -4.200425000 | 16.246698000 |
| C8  | -1.982028000 | -2.683777000 | 17.205955000 |
| C9  | 0.249996000  | -2.745469000 | 18.100976000 |
| C10 | -0.709245000 | -4.188676000 | 14.770000000 |
| C11 | -0.614124000 | -2.852068000 | 12.742330000 |
| C12 | 1.429506000  | -3.626939000 | 13.744394000 |
| H1  | 2.090063000  | -0.245331000 | 12.973405000 |
| H2  | 1.590304000  | -1.031965000 | 15.727508000 |
| H3  | -1.172288000 | -0.404584000 | 15.012871000 |
| H4  | 5.279752000  | 2.116324000  | 15.764625000 |
| H5  | 4.479442000  | 2.150710000  | 14.194292000 |
| H6  | 3.836613000  | 0.104705000  | 17.251174000 |
| H7  | 5.567363000  | -0.032022000 | 16.844988000 |
| H8  | 4.435150000  | -1.350171000 | 16.450727000 |
| H9  | 5.136828000  | -1.312717000 | 14.178934000 |
| H10 | 6.258026000  | 0.042349000  | 14.451136000 |
| H11 | 4.980746000  | 0.157551000  | 13.205358000 |
| H12 | 3.059896000  | 2.106030000  | 16.910988000 |
| H13 | 3.265599000  | 3.526524000  | 15.891745000 |
| H14 | -0.169282000 | 1.913229000  | 15.544038000 |
| H15 | 0.631299000  | 3.280260000  | 16.368233000 |
| H16 | 0.858588000  | 1.609876000  | 16.951898000 |
| H17 | 2.544478000  | 2.744003000  | 13.267163000 |
| H18 | 1.598073000  | 3.930793000  | 14.206665000 |
| H19 | 0.803405000  | 2.529842000  | 13.435937000 |
| H20 | 0.727491000  | -4.449413000 | 16.361008000 |
| H21 | -0.900953000 | -4.984295000 | 16.767637000 |
| H22 | -2.126028000 | -1.678034000 | 17.605366000 |
| H23 | -2.318550000 | -3.420295000 | 17.949221000 |
| H24 | -2.598631000 | -2.772573000 | 16.310131000 |
| H25 | 1.311091000  | -2.836486000 | 17.857998000 |
| H26 | -0.015276000 | -3.510790000 | 18.843909000 |

|     |              |              |              |
|-----|--------------|--------------|--------------|
| H27 | 0.077800000  | -1.760966000 | 18.542360000 |
| H28 | -1.772555000 | -3.956006000 | 14.655767000 |
| H29 | -0.552766000 | -5.188632000 | 14.339482000 |
| H30 | -1.613918000 | -2.458366000 | 12.937318000 |
| H31 | -0.690921000 | -3.743601000 | 12.104665000 |
| H32 | -0.038976000 | -2.086607000 | 12.217291000 |
| H33 | 1.971049000  | -2.834392000 | 13.223490000 |
| H34 | 1.423721000  | -4.530536000 | 13.118266000 |
| H35 | 1.956279000  | -3.847955000 | 14.675059000 |

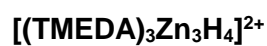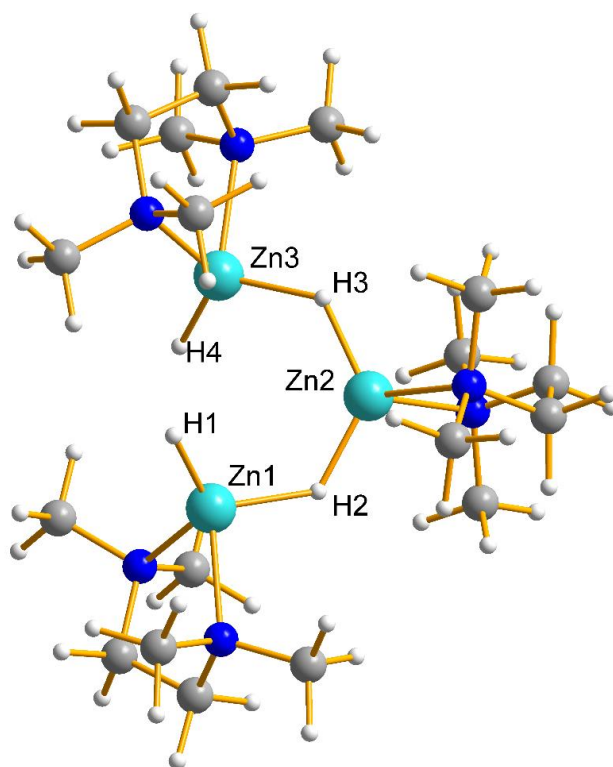

**Figure S140:** DIAMOND representation of the optimized molecular structure of [(TMEDA)<sub>3</sub>Zn<sub>3</sub>H<sub>4</sub>]<sup>2+</sup>.

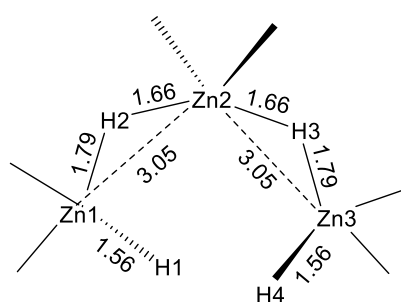

**Natural Charge:**

Zn1= 0.87  
 Zn2= 0.97  
 Zn3= 0.87  
 H1= -0.39  
 H2= -0.45  
 H3= -0.45  
 H4= -0.39

**Wiberg Bond Indices:**

Zn1–H1: 0.70  
Zn1–H2: 0.29  
Zn2–H2: 0.40  
Zn2–H3: 0.40  
Zn3–H3: 0.29  
Zn3–H4: 0.70  
Zn1–Zn2: 0.12  
Zn2–Zn3: 0.12

**NBO Analysis:**

(1.92788) BD(1) Zn1–H1

(29.32%) 0.5415\*Zn1 s(74.12%)p0.33(24.57%)d0.02(1.31%)f0.00(0.00%)  
(70.68%) 0.8407\*H1 s(99.98%)p0.00(0.02%)

(1.73783) BD(1) Zn2–H2

(17.17%) Zn2 s(43.41%)p(55.32%)d(1.27%)  
(82.83%) H2 s(99.99%)p(0.01%)

A bond exists between Zn2 and H2.

**Second Order Study for H2:**

→ Donation from the Zn2–H2 bond to the empty *sp* orbital (25%*s*, 75%*p*) at Zn1:  
75.58 kcal/mol

(1.92839) BD(1) Zn3–H4

(29.32%) 0.5414\*Zn3 s(74.13%)p0.33(24.56%)d0.02(1.31%)f0.00(0.00%)  
(70.68%) 0.8407\*H4 s(99.98%)p0.00(0.02%)

(1.73764) BD(1) Zn2–H3

(17.21%) Zn2 s(43.57%)p(55.14%)d(1.29%)  
(82.79%) H3 s(99.99%)p0.00(0.01%)

A bond exists between Zn2 and H3.

**Second Order Study for H3:**

→ Donation from the Zn2–H3 bond to the empty *sp* orbital (25%*s*, 75%*p*) at Zn3:  
75.82 kcal/mol.

**Analysis of the Bonding:**

The structure can be defined as an adduct between a neutral ZnH<sub>2</sub> fragment and two [ZnH]<sup>+</sup> cations. The two Zn–H bonds of the Zn<sub>3</sub>H<sub>2</sub> (Zn2–H1 and Zn2–H3) moiety are weakened because of the donation to the empty *sp* orbitals of the Zn cations (Zn1 and Zn3).

**Optimized Structure**

79

Zn<sub>3</sub>C<sub>18</sub>N<sub>6</sub>H<sub>52</sub>

|     |              |              |             |
|-----|--------------|--------------|-------------|
| Zn1 | 21.689880000 | 7.529445000  | 6.452191000 |
| Zn2 | 24.109301000 | 9.252877000  | 5.767868000 |
| Zn3 | 21.808262000 | 11.100681000 | 4.986130000 |
| N1  | 20.596890000 | 6.636427000  | 4.836727000 |
| N2  | 21.844086000 | 5.513451000  | 7.224777000 |
| N3  | 25.708618000 | 9.024864000  | 4.348404000 |
| N4  | 25.652735000 | 9.412606000  | 7.257376000 |



|     |              |              |             |
|-----|--------------|--------------|-------------|
| N5  | 20.707132000 | 12.053347000 | 6.563246000 |
| N6  | 22.089433000 | 13.103961000 | 4.217857000 |
| C1  | 20.282709000 | 5.263915000  | 5.310781000 |
| C2  | 21.392071000 | 6.591890000  | 3.591660000 |
| C3  | 19.341749000 | 7.378322000  | 4.575926000 |
| C4  | 21.444846000 | 4.656655000  | 6.082882000 |
| C5  | 20.885315000 | 5.389936000  | 8.346859000 |
| C6  | 23.185082000 | 5.125359000  | 7.700116000 |
| C7  | 25.545956000 | 9.869206000  | 3.145897000 |
| C8  | 26.912147000 | 9.448216000  | 5.109871000 |
| C9  | 25.824786000 | 7.611503000  | 3.927140000 |
| C10 | 25.802962000 | 10.818644000 | 7.692037000 |
| C11 | 25.405359000 | 8.569468000  | 8.446345000 |
| C12 | 26.872995000 | 8.948681000  | 6.547699000 |
| C13 | 21.457446000 | 12.053062000 | 7.836635000 |
| C14 | 20.486278000 | 13.441755000 | 6.082520000 |
| C15 | 19.404741000 | 11.381173000 | 6.776677000 |
| C16 | 21.168401000 | 13.273692000 | 3.070638000 |
| C17 | 21.704917000 | 13.981912000 | 5.348443000 |
| C18 | 23.460729000 | 13.421480000 | 3.778033000 |
| H1  | 21.117649000 | 8.644068000  | 7.383256000 |
| H2  | 23.332935000 | 7.788726000  | 5.794798000 |
| H3  | 23.408541000 | 10.754396000 | 5.703808000 |
| H4  | 21.211846000 | 10.016324000 | 4.034589000 |
| H5  | 20.019356000 | 4.615140000  | 4.464477000 |
| H6  | 19.395372000 | 5.324762000  | 5.947377000 |
| H7  | 21.634864000 | 7.612637000  | 3.288524000 |
| H8  | 20.827355000 | 6.105225000  | 2.785486000 |
| H9  | 22.321117000 | 6.040864000  | 3.752751000 |
| H10 | 18.760302000 | 7.455292000  | 5.497402000 |
| H11 | 18.738245000 | 6.869372000  | 3.813218000 |
| H12 | 19.587046000 | 8.383587000  | 4.228105000 |
| H13 | 21.173338000 | 3.649130000  | 6.428030000 |
| H14 | 22.316853000 | 4.546142000  | 5.430480000 |
| H15 | 21.190630000 | 6.053792000  | 9.157856000 |
| H16 | 20.851411000 | 4.358041000  | 8.720275000 |
| H17 | 19.882789000 | 5.685823000  | 8.034095000 |
| H18 | 23.914816000 | 5.254366000  | 6.897072000 |
| H19 | 23.203502000 | 4.078119000  | 8.029953000 |
| H20 | 23.466625000 | 5.755961000  | 8.546371000 |
| H21 | 24.648882000 | 9.563399000  | 2.602786000 |
| H22 | 26.410375000 | 9.775779000  | 2.475789000 |
| H23 | 25.440835000 | 10.914821000 | 3.441767000 |
| H24 | 26.951947000 | 10.541422000 | 5.089120000 |
| H25 | 27.826478000 | 9.087805000  | 4.619046000 |
| H26 | 25.942487000 | 6.959063000  | 4.794189000 |
| H27 | 26.685473000 | 7.472921000  | 3.260116000 |
| H28 | 24.916826000 | 7.315899000  | 3.398145000 |
| H29 | 25.985250000 | 11.469511000 | 6.835036000 |
| H30 | 26.636621000 | 10.921328000 | 8.398665000 |
| H31 | 24.883449000 | 11.146320000 | 8.180609000 |
| H32 | 24.497172000 | 8.906984000  | 8.950728000 |
| H33 | 26.242284000 | 8.627083000  | 9.154218000 |
| H34 | 25.273910000 | 7.530006000  | 8.139498000 |
| H35 | 26.876727000 | 7.854766000  | 6.569881000 |
| H36 | 27.776782000 | 9.279179000  | 7.077549000 |
| H37 | 21.634779000 | 11.020307000 | 8.144562000 |
| H38 | 20.890109000 | 12.567526000 | 8.623512000 |
| H39 | 22.419618000 | 12.554534000 | 7.712014000 |
| H40 | 20.233587000 | 14.104276000 | 6.921287000 |

|     |              |              |             |
|-----|--------------|--------------|-------------|
| H41 | 19.617727000 | 13.431485000 | 5.417941000 |
| H42 | 18.852621000 | 11.338864000 | 5.835155000 |
| H43 | 18.803657000 | 11.920605000 | 7.520121000 |
| H44 | 19.581943000 | 10.363087000 | 7.128651000 |
| H45 | 21.461499000 | 12.593746000 | 2.268554000 |
| H46 | 21.196537000 | 14.305371000 | 2.696006000 |
| H47 | 20.144311000 | 13.029039000 | 3.356840000 |
| H48 | 21.502667000 | 15.003705000 | 4.997708000 |
| H49 | 22.561193000 | 14.040372000 | 6.027968000 |
| H50 | 24.160697000 | 13.262532000 | 4.601980000 |
| H51 | 23.540305000 | 14.464174000 | 3.442945000 |
| H52 | 23.733835000 | 12.771689000 | 2.943645000 |

## References

- [S1] a) G. D. Barbaras, C. Dillard, A. E. Finholt, T. Wartik, K. E. Wilzbach, H. I. Schlesinger, *J. Am. Chem. Soc.* **1951**, *73*, 4585-4590. b) E. C. Ashby, John J. Watkins, *Inorg. Chem.* **1977**, *16*, 2070-2075. c) E. C. Ashby, J. J. Watkins, D. Greig, D. F. Shriver, *Inorg. Synth.*, **2007**, 6-9.
- [S2] M. Brookhart, B. Grant, A. F. Volpe, *Organometallics* **1992**, *11*, 3920-3922.
- [S3] M. Ito, M. Itazaki, T. Abe, H. Nakazawa, *Chem. Lett.* **2016**, *45*, 1434-1436.
- [S4] T. J. Herrington, A. J. W. Thom, A. J. P. Whitea, A. E. Ashley, *Dalton Trans.* **2012**, *41*, 9019-9022.
- [S5] S. Enthaler, M. Weidauer, J. Gonzales, private CSD communication, CCDC1034047, 2014.
- [S6] I. N. Jung, W. P. Weber, *J. Org. Chem.*, **1976**, *41*, 946-948.
- [S7] G. Timothé, C. Clément, T. Pierre, C. Thibault, *Synlett.*, **2017**, *28*, 2473–2477.
- [S8] H. Watanabe, K. Higuchi, M. Kobayashi, M. Hara, Y. Koike, T. Kitahara, Y. Nagai, *J. Chem. Soc., Chem. Commun.*, **1977**, 534-535.
- [S9] G. M. Sheldrick, *Acta Cryst.* **2015**, *A71*, 3-8.
- [S10] G. M. Sheldrick, *Acta Cryst.* **2008**, *A64*, 112-122.
- [S11] O. V. Dolomanov, L. J. Bourhis, R. J. Gildea, J. A. K. Howard, H. Puschmann, *J. Appl. Cryst.* **2009**, *42*, 339-341.
- [S12] H. Putz, K. Brandenburg, Diamond Version 4.6.0, *Crystal Impact GbR*, Bonn, **2019**.
- [S13] D. Andrae, U. Haeussermann, M. Dolg, H. Stoll, H. Preuss, *Theor. Chim. Acta* **1990**, *77*, 123–141.
- [S14] A. W. Ehlers, M. Böhme, S. Dapprich, A. Gobbi, A. Höllwarth, V. Jonas, K. F. Köhler, R. Stegmann, A. Veldkamp, G. Frenking, *Chem. Phys. Lett.* **1993**, *208*, 111–114.
- [S15] P. C. Hariharan, J. A. Pople, *Theor. Chim. Acta* **1973**, *28*, 213–222.
- [S16] A. D. Becke, *J. Chem. Phys.* **1993**, *98*, 5648–5652.
- [S17] K. Burke, J. P. Perdew, W. Yang, *Electronic Density Functional Theory: Recent Progress and New Directions*, (Ed: J. F. Dobson; G. Vignale, M. P. Das), Springer, Heidelberg, **1998**.
- [S18] Gaussian 09, Revision D.01, M. J. Frisch, G. W. Trucks, H. B. Schlegel, G. E. Scuseria, M. A. Robb, J. R. Cheeseman, G. Scalmani, V. Barone, B. Mennucci, G. A. Petersson,

H. Nakatsuji, M. Caricato, X. Li, H. P. Hratchian, A. F. Izmaylov, J. Bloino, G. Zheng, J. L. Sonnenberg, M. Hada, M. Ehara, K. Toyota, R. Fukuda, J. Hasegawa, M. Ishida, T. Nakajima, Y. Honda, O. Kitao, H. Nakai, T. Vreven, J. A. Montgomery, Jr., J. E. Peralta, F. Ogliaro, M. Bearpark, J. J. Heyd, E. Brothers, K. N. Kudin, V. N. Staroverov, R. Kobayashi, J. Normand, K. Raghavachari, A. Rendell, J. C. Burant, S. S. Iyengar, J. Tomasi, M. Cossi, N. Rega, J. M. Millam, M. Klene, J. E. Knox, J. B. Cross, V. Bakken, C. Adamo, J. Jaramillo, R. Gomperts, R. E. Stratmann, O. Yazyev, A. J. Austin, R. Cammi, C. Pomelli, J. W. Ochterski, R. L. Martin, K. Morokuma, V. G. Zakrzewski, G. A. Voth, P. Salvador, J. J. Dannenberg, S. Dapprich, A. D. Daniels, Ö. Farkas, J. B. Foresman, J. V. Ortiz, J. Cioslowski, and D. J. Fox, Gaussian, Inc., Wallingford CT, **2009**.

[S19] A. E. Reed, L. A. Curtiss and F. Weinhold, *Chem. Rev.* **1988**, *88*, 899.
